# Supplementary material for: Paired analysis of host and pathogen genomes identifies determinants of human tuberculosis
Source: Nat Commun. 2024 Nov 29;15:10393. doi: 10.1038/s41467-024-54741-w (PMC11607449; doi:10.1038/s41467-024-54741-w)
Supplement: Supplementary file 3 — Supplementary Data 1-13 [file 41467_2024_54741_MOESM3_ESM.xlsx]

## Sheet: ST1_Data_QC
Supplementary Data 1: Summary of cohort size, characteristics and quality control criteria.
	Cohort characteristic		QC criteria
Enrolled participant (N)	Median Age (range)	Sex (% male)	individuals with multi-infection	HIV positive individual	Individuals post QC
1632	25 (8-85)	0.626	31	45	1556

## Sheet: ST2_top_association_summary
Supplementary Data 2. Association statistics of rs3130660 with an Mtb phylogenetic marker (Position 271640). Odds Ratio (OR), 95% confidence interval (CI), and P-value are obtained from running a mixed regression model including genetic relatedness matrix as a random effect, and age and sex as fixed effects.
rs3130660-A allele	Absence of the Mtb g2g-L2 marker		Presence of the Mtb g2g-L2 marker		OR (95% CI)	P-value
	N	Frequency	N	Frequency
	1454	0.00687758	102	0.0686275	10.06 (4.87-20.77)	7.91971e-08

## Sheet: ST3_correlated_Mtb_positions
Supplementary Data 3. Mtb positions that are in high linkage with the top associated Mtb position (271640, bold). Each Mtb variant is annotated by its correlation with Mtb position 271640, functional annotation predicted by variant effect predictor (VEP), rv ID, gene name, gene description, amino acid change, functional consequence predicted by SIFT. A SIFT score < 0.05 is predicted to be deleter…
Mtb position	Pearson r2	VEP annotation	Rv_tag	Gene	Description	Amino acid change	SIFT score	SIFT prediction	SIFT note
74822	0.913672	missense_variant	Rv0067c	Rv0067c	transcriptional regulator TetR-family	p.Glu126Gly	0.18	TOLERATED
123493	0.904746	missense_variant	Rv0104	Rv0104	hypothetical protein	p.Tyr393Asp	0	AFFECT PROTEIN FUNCTION	LOW CONFIDENCE
127075	0.894965	missense_variant	Rv0107c	ctpI	cation-transporter P-type ATPase CtpI	p.Val1156Ala	0.12	TOLERATED
258682	0.904746	missense_variant	Rv0215c	fadE3	acyl-CoA dehydrogenase FadE3	p.Tyr59His	0	AFFECT PROTEIN FUNCTION	LOW CONFIDENCE
271640	1	synonymous_variant	Rv0227c	Rv0227c	membrane protein	-	-	-
389038	0.904746	missense_variant	Rv0321	dcd	dCTP deaminase, dUMP-forming	p.Arg153Ser	0.08	TOLERATED
425871	0.898434	missense_variant	Rv0355c	PPE8	PPE family protein PPE8	p.Gly2937Arg	0	AFFECT PROTEIN FUNCTION	LOW CONFIDENCE
478662	0.904746	missense_variant	Rv0400c	fadE7	acyl-CoA dehydrogenase FadE7	p.Met364Ile	0.49	TOLERATED
484428	0.924341	missense_variant	Rv0404	fadD30	Probable long-chain-fatty-acid--AMP ligase FadD30	p.Ser151Phe	0.02	AFFECT PROTEIN FUNCTION	LOW CONFIDENCE
502284	0.894965	missense_variant	Rv0416	thiS	possible protein thiS	p.Val40Met	0	AFFECT PROTEIN FUNCTION
565961	0.924341	synonymous_variant	Rv0475	hbhA	heparin-binding hemagglutinin	-	-	-
610604	0.914538	synonymous_variant	Rv0518	Rv0518	GDSL lipase Rv0518	-	-	-
687191	0.904746	missense_variant	Rv0589	mce2A	MCE-family protein Mce2A	p.Ala124Val	0.26	TOLERATED
703356	0.904746	missense_variant	Rv0608	vapB28	antitoxin VapB28	p.Ala38Val	0.18	TOLERATED
779630	0.924341	synonymous_variant	Rv0679c	Rv0679c	threonine rich protein	-	-	-
846841	0.855953	missense_variant	Rv0754	PE_PGRS11	PE-PGRS family protein PE_PGRS11	p.Val228Gly	0	AFFECT PROTEIN FUNCTION	LOW CONFIDENCE
847613	0.934155	missense_variant	Rv0754	PE_PGRS11	PE-PGRS family protein PE_PGRS11	p.Glu485Asp	0	AFFECT PROTEIN FUNCTION	LOW CONFIDENCE
854588	0.924341	synonymous_variant	Rv0760c	Rv0760c	steroid delta-isomerase	-	-	-
932074	0.914538	upstream_gene_variant	Rv0834c	PE_PGRS14	PE-PGRS family protein PE_PGRS14	-	-	-
947499	0.914538	missense_variant	Rv0850	Rv0850	transposase	p.Asp63Gly	0	AFFECT PROTEIN FUNCTION	LOW CONFIDENCE
1072850	0.914538	synonymous_variant	Rv0959	Rv0959	hypothetical protein	-	-	-
1141362	0.904746	missense_variant	Rv1020	mfd	Ttanscription-repair-coupling facto	p.Val799Ala	0.01	AFFECT PROTEIN FUNCTION
1154646	0.914538	missense_variant	Rv1030	kdpB	potassium-transporting ATPase ATP-binding subunit	p.Ser308Phe	0	AFFECT PROTEIN FUNCTION
1249019	0.914538	missense_variant	Rv1125	Rv1125	WS_DGAT_C domain-containing protein	p.Arg313Gln
1249360	0.933275	missense_variant	Rv1126c	Rv1126c	conserved protein	p.Asp192Glu	1	TOLERATED
1284616	0.904746	missense_variant	Rv1158c	Rv1158c	alanine and proline rich protein	p.Gly83Trp
1433314	0.894965	missense_variant	Rv1280c	oppA	periplasmic oligopeptide-binding lipoprotein OppA	p.Leu43Ile	0.3	TOLERATED
1528771	0.914538	synonymous_variant	Rv1358	Rv1358	transcriptional regulator	-	-	-
1566863	0.914538	synonymous_variant	Rv1392	metK	S-adenosylmethionine synthase	-	-	-
1601344	0.933275	synonymous_variant	Rv1426c	lipO	esterase LipO	-	-	-
1689708	0.914538	synonymous_variant	Rv1498c	Rv1498c	methyltransferase	-	-	-
1703555	0.914538	missense_variant	Rv1511	gmdA	GDP-D-mannose dehydratase GmdA	p.Tyr161Ser	0.23	TOLERATED
1829423	0.855953	synonymous_variant	Rv1627c	Rv1627c	nonspecific lipid-transfer protein	-	-	-
1854169	0.894965	synonymous_variant	Rv1644	tsnR	23S rRNA methyltransferase TsnR	-	-
1892228	0.914538	synonymous_variant	Rv1665	pks11	chalcone synthase Pks11	-	-	-
1965811	0.914538	missense_variant	Rv1738	Rv1738	hypothetical protein	p.Arg52His	0.09	TOLERATED
2004869	0.864855	missense_variant	Rv1770	Rv1770	conserved protein	p.Gly331Asp	NA	NA
2029015	0.914538	synonymous_variant	Rv1790	PPE27	PPE family protein PPE27	-	-	-
2190485	0.932556	missense_variant	Rv1937	Rv1937	oxidoreductase	p.Arg664Ser	0	AFFECT PROTEIN FUNCTION	LOW CONFIDENCE
2209526	0.875437	missense_variant	Rv1966	mce3A	MCE-family protein Mce3A	p.Gln67Arg	NA	NA
2244857	0.914538	missense_variant	Rv1999c	Rv1999c	APA family basic amino acid/polyamine antiporter	p.Trp94Cys	0.07	TOLERATED
2291161	0.934155	synonymous_variant	Rv2045c	lipT	carboxylesterase LipT	-	-	-
2310984	0.807436	missense_variant	Rv2052c	Rv2052c	hypothetical protein	p.Arg512Trp	0	AFFECT PROTEIN FUNCTION	LOW CONFIDENCE
2315726	0.904746	missense_variant	Rv2059	Rv2059	zinc/manganese transporter substrate-binding protein	p.Leu185Phe	0.06	AFFECT PROTEIN FUNCTION
2437470	0.855953	synonymous_variant	Rv2175c	Rv2175c	DNA-binding protein	-	-	-
2474686	0.898434	synonymous_variant	Rv2209	Rv2209	integral membrane protein	-	-	-
2479912	0.913672	upstream_gene_variant	Rv2210c	ilvE	branched-chain-amino-acid aminotransferase IlvE	-	-	-
2596089	0.904746	missense_variant	Rv2323c	Rv2323c	hypothetical protein	p.Trp61Arg	0.31	TOLERATED
2670972	0.913672	missense_variant	Rv2382c	mbtC	mycobactin polyketide synthetase MbtC	p.Tyr211Cys	0.2	TOLERATED
2724503	0.924341	synonymous_variant	Rv2427c	proA	gamma-glutamyl phosphate reductase ProA	-	-	-
2852811	0.903887	upstream_gene_variant	Rv2524c	fas	fatty acid synthase Fas	-	-	-
2916261	0.894965	upstream_gene_variant	Rv2585c	Rv2585c	peptide/nickel transporter substrate-binding protein	-	-	-
2992031	0.885196	synonymous_variant	Rv2676c	Rv2676c	YihY family protein	-	-	-
3001498	0.934155	synonymous_variant	Rv2684	arsA	uncharacterized transporter	-	-	-
3020635	0.914538	missense_variant	Rv2707	Rv2707	YihY family protein	p.Leu21Phe	NA	NA
3067039	0.894113	missense_variant	Rv2753c	dapA	dihydrodipicolinate synthase DapA	p.Leu29Pro	0.01	AFFECT PROTEIN FUNCTION
3102253	0.844752	upstream_gene_variant	Rv2789c	fadE21	acyl-CoA dehydrogenase FadE21	-	-	-
3195498	0.904746	synonymous_variant	Rv2885c	Rv2885c	transposase	-	-	-
3313568	0.904746	missense_variant	Rv2961	Rv2961	transposase	p.Gly96Ser	0	AFFECT PROTEIN FUNCTION
3355057	0.898434	missense_variant	Rv2996c	serA1	d-3-phosphoglycerate dehydrogenase SerA1	p.Val5Ile	0.67	TOLERATED
3652422	0.894965	missense_variant	Rv3270	ctpC	metal cation-transporter P-type ATPase CtpC	p.Asp633Asn	0.02	AFFECT PROTEIN FUNCTION
3674138	0.885196	synonymous_variant	Rv3293	pcd	piperideine-6-carboxylic acid dehydrogenase Pcd	-	-	-
3783714	0.884349	missense_variant	Rv3370c	dnaE2	DNA polymerase III alpha subunit DnaE2	p.Val343Ile	0.05	TOLERATED
3853726	0.914538	missense_variant	Rv3434c	Rv3434c	transmembrane protein	p.Leu68Arg	0	AFFECT PROTEIN FUNCTION
3868748	0.904746	missense_variant	Rv3448	eccD4	ESX-4 secretion system protein EccD4	p.Gly133Ser	NA	NA
3958086	0.894965	missense_variant	Rv3521	Rv3521	hypothetical protein	p.Tyr189Ser	NA	NA
4015101	0.904746	missense_variant	Rv3573c	fadE34	acyl-CoA dehydrogenase FadE34	p.Ala371Val	0.13	TOLERATED
4123836	0.885196	missense_variant	Rv3682	ponA2	bifunctional membrane-associated penicillin-binding protein 1A/1B PonA2	p.Asp641Asn	0	AFFECT PROTEIN FUNCTION	LOW CONFIDENCE
4147033	0.932556	missense_variant	Rv3704c	gshA	cysteine ligase GshA	p.Arg385Leu	0	AFFECT PROTEIN FUNCTION	LOW CONFIDENCE
4179930	0.845404	missense_variant	Rv3729	Rv3729	transferase	p.Arg549Lys	0.05	TOLERATED
4215793	0.916726	upstream_gene_variant	Rv3764c	tcrY	OmpR family two-component system sensor histidine kinase	-	-	-
4252333	0.914538	missense_variant	Rv3797	fadE35	probable acyl-CoA dehydrogenase FadE35	p.Asp417Asn	0.03	AFFECT PROTEIN FUNCTION
4288859	0.914538	missense_variant	Rv3823c	mmpL8	sulfolipid-1 transporter MmpL8	p.Arg891Cys	0	AFFECT PROTEIN FUNCTION
4292267	0.904746	missense_variant	Rv3824c	papA1	acyltransferase PapA1	p.Gly303Asp	0.32	TOLERATED
4349047	0.913672	missense_variant	Rv3871	eccCb1	ESX-1 secretion system protein EccCb1	p.Ser74Phe	0.04	AFFECT PROTEIN FUNCTION	LOW CONFIDENCE
4357675	0.933275	missense_variant	Rv3879c	espK	ESX-1 secretion-associated protein EspK	p.Val703Ala	0	AFFECT PROTEIN FUNCTION	LOW CONFIDENCE
4386971	0.934155	upstream_gene_variant	Rv3896c	Rv3896c	hypothetical protein	-	-	-
4391427	0.923468	synonymous_variant	Rv3906c	Rv3906c	hypothetical protein	-	-	-
4401732	0.904746	missense_variant	Rv3913	trxB2	thioredoxin reductase	p.Thr2Asn	0	AFFECT PROTEIN FUNCTION	LOW CONFIDENCE

## Sheet: ST4_secondary_analysis_g2g_rs31
Supplementary Data 4. Association statistics of rs3130660 wtih L2 vs L4 lineage. Odds Ratio (OR), 95% confidence interval (CI), and P-value are obtained from running a mixed regression model including genetic relatedness matrix as a random effect, and age and sex as fix effects.
rs3130660-A allele	L2		L4		OR (95% CI)	P-value
	N	Frequency	N	Frequency
	178	0.0421348	1378	0.00689405	5.96 (2.97-11.97)	1.41705e-06

## Sheet: ST5_coloc_results
Supplementary Data 5: colocalization analysis of the host genomic locus that is significantly associated with the Mtb genome. Posterior probability obtained using the coloc software is shown between the g2g summary statistics and each of the 48 cis-, protein coding genesin each of the 109 RNA sequencing dataset included in the eQTL catalog release 6.
RNAseq_dataset	Gene	coloc_posterior_probability
Alasoo_2018_macrophage_naive	HLA-A	0.143145
Alasoo_2018_macrophage_IFNg	HLA-A	0.0893728
Alasoo_2018_macrophage_Salmonella	HLA-A	0.569925
Alasoo_2018_macrophage_IFNg+Salmonella	HLA-A	0.471759
BLUEPRINT_monocyte	HLA-A	0.435803
BLUEPRINT_neutrophil	HLA-A	0.52123
BLUEPRINT_T-cell	HLA-A	0.382734
Bossini-Castillo_2019_Treg_naive	HLA-A	0.496561
Braineac2_putamen	HLA-A	0.110266
Braineac2_substantia_nigra	HLA-A	0.0806521
BrainSeq_brain	HLA-A	0.466587
CAP_LCL_naive	HLA-A	0.477388
CAP_LCL_statin	HLA-A	0.439917
CommonMind_DLPFC_naive	HLA-A	0.473999
FUSION_muscle_naive	HLA-A	0.393127
FUSION_adipose_naive	HLA-A	0.446032
GENCORD_LCL	HLA-A	0.480399
GENCORD_fibroblast	HLA-A	0.464665
GENCORD_T-cell	HLA-A	0.477909
GEUVADIS_LCL	HLA-A	0.473571
GTEx_adipose_subcutaneous	HLA-A	0.461832
GTEx_adipose_visceral	HLA-A	0.46308
GTEx_adrenal_gland	HLA-A	0.397748
GTEx_artery_aorta	HLA-A	0.498584
GTEx_artery_coronary	HLA-A	0.499158
GTEx_artery_tibial	HLA-A	0.498756
GTEx_brain_amygdala	HLA-A	0.458472
GTEx_brain_anterior_cingulate_cortex	HLA-A	0.494983
GTEx_brain_caudate	HLA-A	0.463504
GTEx_brain_cerebellar_hemisphere	HLA-A	0.463354
GTEx_brain_cerebellum	HLA-A	0.498404
GTEx_brain_cortex	HLA-A	0.576671
GTEx_brain_frontal_cortex	HLA-A	0.529515
GTEx_brain_hippocampus	HLA-A	0.373298
GTEx_brain_hypothalamus	HLA-A	0.443496
GTEx_brain_nucleus_accumbens	HLA-A	0.475288
GTEx_brain_putamen	HLA-A	0.46377
GTEx_brain_spinal_cord	HLA-A	0.345806
GTEx_brain_substantia_nigra	HLA-A	0.0913591
GTEx_breast	HLA-A	0.480691
GTEx_fibroblast	HLA-A	0.45525
GTEx_LCL	HLA-A	0.424106
GTEx_colon_sigmoid	HLA-A	0.500123
GTEx_colon_transverse	HLA-A	0.503496
GTEx_esophagus_gej	HLA-A	0.497956
GTEx_esophagus_mucosa	HLA-A	0.430637
GTEx_esophagus_muscularis	HLA-A	0.502401
GTEx_heart_atrial_appendage	HLA-A	0.504348
GTEx_heart_left_ventricle	HLA-A	0.615532
GTEx_kidney_cortex	HLA-A	0.201186
GTEx_liver	HLA-A	0.132899
GTEx_lung	HLA-A	0.465407
GTEx_minor_salivary_gland	HLA-A	0.175214
GTEx_muscle	HLA-A	0.392193
GTEx_nerve_tibial	HLA-A	0.489724
GTEx_ovary	HLA-A	0.49951
GTEx_pancreas	HLA-A	0.531566
GTEx_pituitary	HLA-A	0.446034
GTEx_prostate	HLA-A	0.493229
GTEx_skin_not_sun_exposed	HLA-A	0.471803
GTEx_skin_sun_exposed	HLA-A	0.461668
GTEx_small_intestine	HLA-A	0.426386
GTEx_spleen	HLA-A	0.45771
GTEx_stomach	HLA-A	0.49662
GTEx_testis	HLA-A	0.498846
GTEx_thyroid	HLA-A	0.502236
GTEx_uterus	HLA-A	0.496769
GTEx_vagina	HLA-A	0.457952
GTEx_blood	HLA-A	0.454948
HipSci_iPSC	HLA-A	0.477886
iPSCORE_iPSC	HLA-A	0.454325
Lepik_2017_blood	HLA-A	0.480225
Nedelec_2016_macrophage_Listeria	HLA-A	0.299963
Nedelec_2016_macrophage_naive	HLA-A	0.263994
Nedelec_2016_macrophage_Salmonella	HLA-A	0.504331
Peng_2018_placenta_naive	HLA-A	0.157812
PhLiPS_iPSC	HLA-A	0.467836
PhLiPS_HLC	HLA-A	0.111696
Quach_2016_monocyte_naive	HLA-A	0.484934
Quach_2016_monocyte_LPS	HLA-A	0.489503
Quach_2016_monocyte_Pam3CSK4	HLA-A	0.449246
Quach_2016_monocyte_R848	HLA-A	0.499792
Quach_2016_monocyte_IAV	HLA-A	0.50209
ROSMAP_brain_naive	HLA-A	0.479621
Schmiedel_2018_Tfh_memory	HLA-A	0.463276
Schmiedel_2018_Th17_memory	HLA-A	0.463273
Schmiedel_2018_Th1_memory	HLA-A	0.500854
Schmiedel_2018_Th2_memory	HLA-A	0.462345
Schmiedel_2018_Th1-17_memory	HLA-A	0.458662
Schmiedel_2018_Treg_memory	HLA-A	0.440479
Schmiedel_2018_Treg_naive	HLA-A	0.429033
Schmiedel_2018_B-cell_naive	HLA-A	0.0751256
Schmiedel_2018_CD4_T-cell_naive	HLA-A	0.113655
Schmiedel_2018_CD4_T-cell_anti-CD3-CD28	HLA-A	0.276453
Schmiedel_2018_CD8_T-cell_naive	HLA-A	0.373393
Schmiedel_2018_CD8_T-cell_anti-CD3-CD28	HLA-A	0.151147
Schmiedel_2018_monocyte_CD16_naive	HLA-A	0.177761
Schmiedel_2018_monocyte_naive	HLA-A	0.0800398
Schmiedel_2018_NK-cell_naive	HLA-A	0.134388
Schwartzentruber_2018_sensory_neuron	HLA-A	0.397684
Steinberg_2020_synovium_naive	HLA-A	0.0878102
Steinberg_2020_low_grade_cartilage_naive	HLA-A	0.499053
Steinberg_2020_high_grade_cartilage_naive	HLA-A	0.158527
TwinsUK_fat	HLA-A	0.485132
TwinsUK_LCL	HLA-A	0.48495
TwinsUK_skin	HLA-A	0.484429
TwinsUK_blood	HLA-A	0.48367
van_de_Bunt_2015_pancreatic_islet	HLA-A	0.508083
Young_2019_microglia_naive	HLA-A	0.100077
Alasoo_2018_macrophage_naive	ZNRD1	0.107326
Alasoo_2018_macrophage_IFNg	ZNRD1	0.0864081
Alasoo_2018_macrophage_Salmonella	ZNRD1	0.116831
Alasoo_2018_macrophage_IFNg+Salmonella	ZNRD1	0.0933718
BLUEPRINT_monocyte	ZNRD1	0.438392
BLUEPRINT_neutrophil	ZNRD1	0.153672
BLUEPRINT_T-cell	ZNRD1	0.409133
Bossini-Castillo_2019_Treg_naive	ZNRD1	0.209803
Braineac2_putamen	ZNRD1	0.0931816
Braineac2_substantia_nigra	ZNRD1	0.0970061
BrainSeq_brain	ZNRD1	0.469836
CAP_LCL_naive	ZNRD1	0.473147
CAP_LCL_statin	ZNRD1	0.471216
CommonMind_DLPFC_naive	ZNRD1	0.46971
FUSION_muscle_naive	ZNRD1	0.47164
FUSION_adipose_naive	ZNRD1	0.222692
GENCORD_LCL	ZNRD1	0.264927
GENCORD_fibroblast	ZNRD1	0.106525
GENCORD_T-cell	ZNRD1	0.317288
GEUVADIS_LCL	ZNRD1	0.469839
GTEx_adipose_subcutaneous	ZNRD1	0.404461
GTEx_adipose_visceral	ZNRD1	0.38703
GTEx_adrenal_gland	ZNRD1	0.105798
GTEx_artery_aorta	ZNRD1	0.380581
GTEx_artery_coronary	ZNRD1	0.0913574
GTEx_artery_tibial	ZNRD1	0.327098
GTEx_brain_amygdala	ZNRD1	0.0916545
GTEx_brain_anterior_cingulate_cortex	ZNRD1	0.119021
GTEx_brain_caudate	ZNRD1	0.222947
GTEx_brain_cerebellar_hemisphere	ZNRD1	0.245306
GTEx_brain_cerebellum	ZNRD1	0.203282
GTEx_brain_cortex	ZNRD1	0.140063
GTEx_brain_frontal_cortex	ZNRD1	0.157311
GTEx_brain_hippocampus	ZNRD1	0.0976799
GTEx_brain_hypothalamus	ZNRD1	0.137223
GTEx_brain_nucleus_accumbens	ZNRD1	0.107849
GTEx_brain_putamen	ZNRD1	0.0853844
GTEx_brain_spinal_cord	ZNRD1	0.111369
GTEx_brain_substantia_nigra	ZNRD1	0.0865069
GTEx_breast	ZNRD1	0.1367
GTEx_fibroblast	ZNRD1	0.472178
GTEx_LCL	ZNRD1	0.228245
GTEx_colon_sigmoid	ZNRD1	0.322788
GTEx_colon_transverse	ZNRD1	0.400255
GTEx_esophagus_gej	ZNRD1	0.161168
GTEx_esophagus_mucosa	ZNRD1	0.425455
GTEx_esophagus_muscularis	ZNRD1	0.381318
GTEx_heart_atrial_appendage	ZNRD1	0.119965
GTEx_heart_left_ventricle	ZNRD1	0.277944
GTEx_kidney_cortex	ZNRD1	0.0841275
GTEx_liver	ZNRD1	0.132856
GTEx_lung	ZNRD1	0.497246
GTEx_minor_salivary_gland	ZNRD1	0.120556
GTEx_muscle	ZNRD1	0.470833
GTEx_nerve_tibial	ZNRD1	0.380173
GTEx_ovary	ZNRD1	0.125206
GTEx_pancreas	ZNRD1	0.368085
GTEx_pituitary	ZNRD1	0.261424
GTEx_prostate	ZNRD1	0.155946
GTEx_skin_not_sun_exposed	ZNRD1	0.315907
GTEx_skin_sun_exposed	ZNRD1	0.390845
GTEx_small_intestine	ZNRD1	0.274845
GTEx_spleen	ZNRD1	0.393232
GTEx_stomach	ZNRD1	0.118652
GTEx_testis	ZNRD1	0.107522
GTEx_thyroid	ZNRD1	0.382011
GTEx_uterus	ZNRD1	0.108034
GTEx_vagina	ZNRD1	0.0917695
GTEx_blood	ZNRD1	0.472231
HipSci_iPSC	ZNRD1	0.403713
iPSCORE_iPSC	ZNRD1	0.0907802
Lepik_2017_blood	ZNRD1	0.431072
Nedelec_2016_macrophage_Listeria	ZNRD1	0.157231
Nedelec_2016_macrophage_naive	ZNRD1	0.102971
Nedelec_2016_macrophage_Salmonella	ZNRD1	0.112783
Peng_2018_placenta_naive	ZNRD1	0.0791955
PhLiPS_iPSC	ZNRD1	0.0977281
PhLiPS_HLC	ZNRD1	0.095436
Quach_2016_monocyte_naive	ZNRD1	0.469355
Quach_2016_monocyte_LPS	ZNRD1	0.388741
Quach_2016_monocyte_Pam3CSK4	ZNRD1	0.484815
Quach_2016_monocyte_R848	ZNRD1	0.127206
Quach_2016_monocyte_IAV	ZNRD1	0.141275
ROSMAP_brain_naive	ZNRD1	0.469884
Schmiedel_2018_Tfh_memory	ZNRD1	0.0878352
Schmiedel_2018_Th17_memory	ZNRD1	0.0865005
Schmiedel_2018_Th1_memory	ZNRD1	0.0849493
Schmiedel_2018_Th2_memory	ZNRD1	0.107959
Schmiedel_2018_Th1-17_memory	ZNRD1	0.12119
Schmiedel_2018_Treg_memory	ZNRD1	0.239808
Schmiedel_2018_Treg_naive	ZNRD1	0.0782701
Schmiedel_2018_B-cell_naive	ZNRD1	0.0853872
Schmiedel_2018_CD4_T-cell_naive	ZNRD1	0.0951522
Schmiedel_2018_CD4_T-cell_anti-CD3-CD28	ZNRD1	0.0892319
Schmiedel_2018_CD8_T-cell_naive	ZNRD1	0.118109
Schmiedel_2018_CD8_T-cell_anti-CD3-CD28	ZNRD1	0.0916067
Schmiedel_2018_monocyte_CD16_naive	ZNRD1	0.269162
Schmiedel_2018_monocyte_naive	ZNRD1	0.292699
Schmiedel_2018_NK-cell_naive	ZNRD1	0.0839868
Schwartzentruber_2018_sensory_neuron	ZNRD1	0.0878543
Steinberg_2020_synovium_naive	ZNRD1	0.0892868
Steinberg_2020_low_grade_cartilage_naive	ZNRD1	0.0820385
Steinberg_2020_high_grade_cartilage_naive	ZNRD1	0.0999844
TwinsUK_fat	ZNRD1	0.383823
TwinsUK_LCL	ZNRD1	0.405005
TwinsUK_skin	ZNRD1	0.424915
TwinsUK_blood	ZNRD1	0.101614
van_de_Bunt_2015_pancreatic_islet	ZNRD1	0.0897533
Young_2019_microglia_naive	ZNRD1	0.0996739
Alasoo_2018_macrophage_naive	PPP1R11	0.073986
Alasoo_2018_macrophage_IFNg	PPP1R11	0.0852426
Alasoo_2018_macrophage_Salmonella	PPP1R11	0.0803486
Alasoo_2018_macrophage_IFNg+Salmonella	PPP1R11	0.0842713
BLUEPRINT_monocyte	PPP1R11	0.080253
BLUEPRINT_neutrophil	PPP1R11	0.173139
BLUEPRINT_T-cell	PPP1R11	0.232751
Bossini-Castillo_2019_Treg_naive	PPP1R11	0.0832364
Braineac2_putamen	PPP1R11	0.0948898
Braineac2_substantia_nigra	PPP1R11	0.0870688
BrainSeq_brain	PPP1R11	0.182591
CAP_LCL_naive	PPP1R11	0.0819388
CAP_LCL_statin	PPP1R11	0.0830373
CommonMind_DLPFC_naive	PPP1R11	0.0959454
FUSION_muscle_naive	PPP1R11	0.087039
FUSION_adipose_naive	PPP1R11	0.0771793
GENCORD_LCL	PPP1R11	0.100329
GENCORD_fibroblast	PPP1R11	0.0762733
GENCORD_T-cell	PPP1R11	0.140115
GEUVADIS_LCL	PPP1R11	0.236121
GTEx_adipose_subcutaneous	PPP1R11	0.146613
GTEx_adipose_visceral	PPP1R11	0.194442
GTEx_adrenal_gland	PPP1R11	0.246905
GTEx_artery_aorta	PPP1R11	0.099317
GTEx_artery_coronary	PPP1R11	0.103452
GTEx_artery_tibial	PPP1R11	0.185857
GTEx_brain_amygdala	PPP1R11	0.0782578
GTEx_brain_anterior_cingulate_cortex	PPP1R11	0.0821911
GTEx_brain_caudate	PPP1R11	0.080471
GTEx_brain_cerebellar_hemisphere	PPP1R11	0.423907
GTEx_brain_cerebellum	PPP1R11	0.412332
GTEx_brain_cortex	PPP1R11	0.08653
GTEx_brain_frontal_cortex	PPP1R11	0.0884304
GTEx_brain_hippocampus	PPP1R11	0.103608
GTEx_brain_hypothalamus	PPP1R11	0.0797071
GTEx_brain_nucleus_accumbens	PPP1R11	0.0847725
GTEx_brain_putamen	PPP1R11	0.0801161
GTEx_brain_spinal_cord	PPP1R11	0.0867778
GTEx_brain_substantia_nigra	PPP1R11	0.101411
GTEx_breast	PPP1R11	0.0785274
GTEx_fibroblast	PPP1R11	0.158559
GTEx_LCL	PPP1R11	0.097269
GTEx_colon_sigmoid	PPP1R11	0.170255
GTEx_colon_transverse	PPP1R11	0.0693513
GTEx_esophagus_gej	PPP1R11	0.0745886
GTEx_esophagus_mucosa	PPP1R11	0.0894931
GTEx_esophagus_muscularis	PPP1R11	0.071387
GTEx_heart_atrial_appendage	PPP1R11	0.0754358
GTEx_heart_left_ventricle	PPP1R11	0.0939561
GTEx_kidney_cortex	PPP1R11	0.0821878
GTEx_liver	PPP1R11	0.0810889
GTEx_lung	PPP1R11	0.0893957
GTEx_minor_salivary_gland	PPP1R11	0.0837919
GTEx_muscle	PPP1R11	0.0625071
GTEx_nerve_tibial	PPP1R11	0.0857047
GTEx_ovary	PPP1R11	0.0787712
GTEx_pancreas	PPP1R11	0.114408
GTEx_pituitary	PPP1R11	0.106738
GTEx_prostate	PPP1R11	0.0812043
GTEx_skin_not_sun_exposed	PPP1R11	0.0690221
GTEx_skin_sun_exposed	PPP1R11	0.247437
GTEx_small_intestine	PPP1R11	0.101486
GTEx_spleen	PPP1R11	0.0818363
GTEx_stomach	PPP1R11	0.0848912
GTEx_testis	PPP1R11	0.303317
GTEx_thyroid	PPP1R11	0.087121
GTEx_uterus	PPP1R11	0.119361
GTEx_vagina	PPP1R11	0.0923913
GTEx_blood	PPP1R11	0.0634024
HipSci_iPSC	PPP1R11	0.0977448
iPSCORE_iPSC	PPP1R11	0.151007
Lepik_2017_blood	PPP1R11	0.576345
Nedelec_2016_macrophage_Listeria	PPP1R11	0.137264
Nedelec_2016_macrophage_naive	PPP1R11	0.0887636
Nedelec_2016_macrophage_Salmonella	PPP1R11	0.454382
Peng_2018_placenta_naive	PPP1R11	0.0871108
PhLiPS_iPSC	PPP1R11	0.086686
PhLiPS_HLC	PPP1R11	0.096872
Quach_2016_monocyte_naive	PPP1R11	0.12104
Quach_2016_monocyte_LPS	PPP1R11	0.593965
Quach_2016_monocyte_Pam3CSK4	PPP1R11	0.554966
Quach_2016_monocyte_R848	PPP1R11	0.553561
Quach_2016_monocyte_IAV	PPP1R11	0.273102
ROSMAP_brain_naive	PPP1R11	0.122765
Schmiedel_2018_Tfh_memory	PPP1R11	0.101901
Schmiedel_2018_Th17_memory	PPP1R11	0.103351
Schmiedel_2018_Th1_memory	PPP1R11	0.0939482
Schmiedel_2018_Th2_memory	PPP1R11	0.0890484
Schmiedel_2018_Th1-17_memory	PPP1R11	0.0827279
Schmiedel_2018_Treg_memory	PPP1R11	0.0787313
Schmiedel_2018_Treg_naive	PPP1R11	0.10515
Schmiedel_2018_B-cell_naive	PPP1R11	0.0930248
Schmiedel_2018_CD4_T-cell_naive	PPP1R11	0.14109
Schmiedel_2018_CD4_T-cell_anti-CD3-CD28	PPP1R11	0.326826
Schmiedel_2018_CD8_T-cell_naive	PPP1R11	0.085984
Schmiedel_2018_CD8_T-cell_anti-CD3-CD28	PPP1R11	0.222992
Schmiedel_2018_monocyte_CD16_naive	PPP1R11	0.0881498
Schmiedel_2018_monocyte_naive	PPP1R11	0.0865409
Schmiedel_2018_NK-cell_naive	PPP1R11	0.0857086
Schwartzentruber_2018_sensory_neuron	PPP1R11	0.0815019
Steinberg_2020_synovium_naive	PPP1R11	0.0874347
Steinberg_2020_low_grade_cartilage_naive	PPP1R11	0.0922906
Steinberg_2020_high_grade_cartilage_naive	PPP1R11	0.0838127
TwinsUK_fat	PPP1R11	0.103357
TwinsUK_LCL	PPP1R11	0.555967
TwinsUK_skin	PPP1R11	0.0740277
TwinsUK_blood	PPP1R11	0.0830753
van_de_Bunt_2015_pancreatic_islet	PPP1R11	0.0974174
Young_2019_microglia_naive	PPP1R11	0.0889927
Alasoo_2018_macrophage_naive	RNF39	NA
Alasoo_2018_macrophage_IFNg	RNF39	NA
Alasoo_2018_macrophage_Salmonella	RNF39	NA
Alasoo_2018_macrophage_IFNg+Salmonella	RNF39	NA
BLUEPRINT_monocyte	RNF39	NA
BLUEPRINT_neutrophil	RNF39	NA
BLUEPRINT_T-cell	RNF39	NA
Bossini-Castillo_2019_Treg_naive	RNF39	NA
Braineac2_putamen	RNF39	0.0812473
Braineac2_substantia_nigra	RNF39	0.0953796
BrainSeq_brain	RNF39	0.525369
CAP_LCL_naive	RNF39	NA
CAP_LCL_statin	RNF39	NA
CommonMind_DLPFC_naive	RNF39	0.472703
FUSION_muscle_naive	RNF39	NA
FUSION_adipose_naive	RNF39	NA
GENCORD_LCL	RNF39	0.0869124
GENCORD_fibroblast	RNF39	0.126842
GENCORD_T-cell	RNF39	0.11286
GEUVADIS_LCL	RNF39	0.329352
GTEx_adipose_subcutaneous	RNF39	0.176404
GTEx_adipose_visceral	RNF39	0.0907812
GTEx_adrenal_gland	RNF39	0.392361
GTEx_artery_aorta	RNF39	0.566077
GTEx_artery_coronary	RNF39	0.177844
GTEx_artery_tibial	RNF39	0.566491
GTEx_brain_amygdala	RNF39	0.545554
GTEx_brain_anterior_cingulate_cortex	RNF39	0.237971
GTEx_brain_caudate	RNF39	0.561162
GTEx_brain_cerebellar_hemisphere	RNF39	0.469988
GTEx_brain_cerebellum	RNF39	0.470166
GTEx_brain_cortex	RNF39	0.519932
GTEx_brain_frontal_cortex	RNF39	0.413296
GTEx_brain_hippocampus	RNF39	0.435746
GTEx_brain_hypothalamus	RNF39	0.474324
GTEx_brain_nucleus_accumbens	RNF39	0.561009
GTEx_brain_putamen	RNF39	0.570172
GTEx_brain_spinal_cord	RNF39	0.361291
GTEx_brain_substantia_nigra	RNF39	0.532522
GTEx_breast	RNF39	0.140985
GTEx_fibroblast	RNF39	0.166462
GTEx_LCL	RNF39	0.117172
GTEx_colon_sigmoid	RNF39	0.209481
GTEx_colon_transverse	RNF39	0.249299
GTEx_esophagus_gej	RNF39	0.10494
GTEx_esophagus_mucosa	RNF39	0.379864
GTEx_esophagus_muscularis	RNF39	0.10912
GTEx_heart_atrial_appendage	RNF39	0.120189
GTEx_heart_left_ventricle	RNF39	0.318368
GTEx_kidney_cortex	RNF39	0.0802185
GTEx_liver	RNF39	0.0850462
GTEx_lung	RNF39	0.41699
GTEx_minor_salivary_gland	RNF39	0.0890971
GTEx_muscle	RNF39	0.514375
GTEx_nerve_tibial	RNF39	0.572637
GTEx_ovary	RNF39	0.0816641
GTEx_pancreas	RNF39	0.481887
GTEx_pituitary	RNF39	0.504788
GTEx_prostate	RNF39	0.101962
GTEx_skin_not_sun_exposed	RNF39	0.322929
GTEx_skin_sun_exposed	RNF39	0.381929
GTEx_small_intestine	RNF39	0.102564
GTEx_spleen	RNF39	0.406631
GTEx_stomach	RNF39	0.103008
GTEx_testis	RNF39	0.429428
GTEx_thyroid	RNF39	0.469969
GTEx_uterus	RNF39	0.214569
GTEx_vagina	RNF39	0.115266
GTEx_blood	RNF39	0.622629
HipSci_iPSC	RNF39	0.477647
iPSCORE_iPSC	RNF39	0.464853
Lepik_2017_blood	RNF39	NA
Nedelec_2016_macrophage_Listeria	RNF39	NA
Nedelec_2016_macrophage_naive	RNF39	NA
Nedelec_2016_macrophage_Salmonella	RNF39	NA
Peng_2018_placenta_naive	RNF39	0.166678
PhLiPS_iPSC	RNF39	0.471382
PhLiPS_HLC	RNF39	NA
Quach_2016_monocyte_naive	RNF39	0.126165
Quach_2016_monocyte_LPS	RNF39	0.0930493
Quach_2016_monocyte_Pam3CSK4	RNF39	0.115239
Quach_2016_monocyte_R848	RNF39	0.254893
Quach_2016_monocyte_IAV	RNF39	0.109342
ROSMAP_brain_naive	RNF39	NA
Schmiedel_2018_Tfh_memory	RNF39	NA
Schmiedel_2018_Th17_memory	RNF39	NA
Schmiedel_2018_Th1_memory	RNF39	NA
Schmiedel_2018_Th2_memory	RNF39	NA
Schmiedel_2018_Th1-17_memory	RNF39	NA
Schmiedel_2018_Treg_memory	RNF39	NA
Schmiedel_2018_Treg_naive	RNF39	NA
Schmiedel_2018_B-cell_naive	RNF39	NA
Schmiedel_2018_CD4_T-cell_naive	RNF39	NA
Schmiedel_2018_CD4_T-cell_anti-CD3-CD28	RNF39	NA
Schmiedel_2018_CD8_T-cell_naive	RNF39	NA
Schmiedel_2018_CD8_T-cell_anti-CD3-CD28	RNF39	NA
Schmiedel_2018_monocyte_CD16_naive	RNF39	NA
Schmiedel_2018_monocyte_naive	RNF39	NA
Schmiedel_2018_NK-cell_naive	RNF39	NA
Schwartzentruber_2018_sensory_neuron	RNF39	0.442904
Steinberg_2020_synovium_naive	RNF39	0.0793524
Steinberg_2020_low_grade_cartilage_naive	RNF39	NA
Steinberg_2020_high_grade_cartilage_naive	RNF39	NA
TwinsUK_fat	RNF39	0.0902765
TwinsUK_LCL	RNF39	0.372694
TwinsUK_skin	RNF39	0.101961
TwinsUK_blood	RNF39	0.126106
van_de_Bunt_2015_pancreatic_islet	RNF39	0.0867698
Young_2019_microglia_naive	RNF39	0.113476
Alasoo_2018_macrophage_naive	TRIM31	NA
Alasoo_2018_macrophage_IFNg	TRIM31	0.0827709
Alasoo_2018_macrophage_Salmonella	TRIM31	0.117385
Alasoo_2018_macrophage_IFNg+Salmonella	TRIM31	0.0871786
BLUEPRINT_monocyte	TRIM31	NA
BLUEPRINT_neutrophil	TRIM31	NA
BLUEPRINT_T-cell	TRIM31	NA
Bossini-Castillo_2019_Treg_naive	TRIM31	NA
Braineac2_putamen	TRIM31	0.086375
Braineac2_substantia_nigra	TRIM31	0.0942254
BrainSeq_brain	TRIM31	NA
CAP_LCL_naive	TRIM31	0.349943
CAP_LCL_statin	TRIM31	0.177553
CommonMind_DLPFC_naive	TRIM31	NA
FUSION_muscle_naive	TRIM31	NA
FUSION_adipose_naive	TRIM31	NA
GENCORD_LCL	TRIM31	0.105715
GENCORD_fibroblast	TRIM31	NA
GENCORD_T-cell	TRIM31	NA
GEUVADIS_LCL	TRIM31	0.354931
GTEx_adipose_subcutaneous	TRIM31	NA
GTEx_adipose_visceral	TRIM31	NA
GTEx_adrenal_gland	TRIM31	0.45029
GTEx_artery_aorta	TRIM31	NA
GTEx_artery_coronary	TRIM31	NA
GTEx_artery_tibial	TRIM31	NA
GTEx_brain_amygdala	TRIM31	NA
GTEx_brain_anterior_cingulate_cortex	TRIM31	NA
GTEx_brain_caudate	TRIM31	NA
GTEx_brain_cerebellar_hemisphere	TRIM31	0.470719
GTEx_brain_cerebellum	TRIM31	0.469243
GTEx_brain_cortex	TRIM31	NA
GTEx_brain_frontal_cortex	TRIM31	NA
GTEx_brain_hippocampus	TRIM31	NA
GTEx_brain_hypothalamus	TRIM31	NA
GTEx_brain_nucleus_accumbens	TRIM31	NA
GTEx_brain_putamen	TRIM31	NA
GTEx_brain_spinal_cord	TRIM31	NA
GTEx_brain_substantia_nigra	TRIM31	NA
GTEx_breast	TRIM31	0.275224
GTEx_fibroblast	TRIM31	NA
GTEx_LCL	TRIM31	0.117674
GTEx_colon_sigmoid	TRIM31	0.140744
GTEx_colon_transverse	TRIM31	0.0810734
GTEx_esophagus_gej	TRIM31	NA
GTEx_esophagus_mucosa	TRIM31	NA
GTEx_esophagus_muscularis	TRIM31	NA
GTEx_heart_atrial_appendage	TRIM31	NA
GTEx_heart_left_ventricle	TRIM31	NA
GTEx_kidney_cortex	TRIM31	NA
GTEx_liver	TRIM31	0.581948
GTEx_lung	TRIM31	0.461306
GTEx_minor_salivary_gland	TRIM31	0.12269
GTEx_muscle	TRIM31	NA
GTEx_nerve_tibial	TRIM31	NA
GTEx_ovary	TRIM31	NA
GTEx_pancreas	TRIM31	NA
GTEx_pituitary	TRIM31	NA
GTEx_prostate	TRIM31	0.108804
GTEx_skin_not_sun_exposed	TRIM31	0.406131
GTEx_skin_sun_exposed	TRIM31	0.513368
GTEx_small_intestine	TRIM31	0.0991366
GTEx_spleen	TRIM31	NA
GTEx_stomach	TRIM31	0.137139
GTEx_testis	TRIM31	0.367234
GTEx_thyroid	TRIM31	0.443759
GTEx_uterus	TRIM31	NA
GTEx_vagina	TRIM31	0.106086
GTEx_blood	TRIM31	NA
HipSci_iPSC	TRIM31	NA
iPSCORE_iPSC	TRIM31	NA
Lepik_2017_blood	TRIM31	NA
Nedelec_2016_macrophage_Listeria	TRIM31	NA
Nedelec_2016_macrophage_naive	TRIM31	NA
Nedelec_2016_macrophage_Salmonella	TRIM31	NA
Peng_2018_placenta_naive	TRIM31	0.104838
PhLiPS_iPSC	TRIM31	NA
PhLiPS_HLC	TRIM31	NA
Quach_2016_monocyte_naive	TRIM31	NA
Quach_2016_monocyte_LPS	TRIM31	NA
Quach_2016_monocyte_Pam3CSK4	TRIM31	NA
Quach_2016_monocyte_R848	TRIM31	NA
Quach_2016_monocyte_IAV	TRIM31	0.212234
ROSMAP_brain_naive	TRIM31	NA
Schmiedel_2018_Tfh_memory	TRIM31	NA
Schmiedel_2018_Th17_memory	TRIM31	NA
Schmiedel_2018_Th1_memory	TRIM31	NA
Schmiedel_2018_Th2_memory	TRIM31	NA
Schmiedel_2018_Th1-17_memory	TRIM31	NA
Schmiedel_2018_Treg_memory	TRIM31	NA
Schmiedel_2018_Treg_naive	TRIM31	NA
Schmiedel_2018_B-cell_naive	TRIM31	NA
Schmiedel_2018_CD4_T-cell_naive	TRIM31	NA
Schmiedel_2018_CD4_T-cell_anti-CD3-CD28	TRIM31	0.246984
Schmiedel_2018_CD8_T-cell_naive	TRIM31	NA
Schmiedel_2018_CD8_T-cell_anti-CD3-CD28	TRIM31	NA
Schmiedel_2018_monocyte_CD16_naive	TRIM31	NA
Schmiedel_2018_monocyte_naive	TRIM31	NA
Schmiedel_2018_NK-cell_naive	TRIM31	NA
Schwartzentruber_2018_sensory_neuron	TRIM31	NA
Steinberg_2020_synovium_naive	TRIM31	NA
Steinberg_2020_low_grade_cartilage_naive	TRIM31	NA
Steinberg_2020_high_grade_cartilage_naive	TRIM31	NA
TwinsUK_fat	TRIM31	NA
TwinsUK_LCL	TRIM31	NA
TwinsUK_skin	TRIM31	0.464405
TwinsUK_blood	TRIM31	NA
van_de_Bunt_2015_pancreatic_islet	TRIM31	0.126912
Young_2019_microglia_naive	TRIM31	NA
Alasoo_2018_macrophage_naive	TRIM40	NA
Alasoo_2018_macrophage_IFNg	TRIM40	NA
Alasoo_2018_macrophage_Salmonella	TRIM40	NA
Alasoo_2018_macrophage_IFNg+Salmonella	TRIM40	NA
BLUEPRINT_monocyte	TRIM40	NA
BLUEPRINT_neutrophil	TRIM40	NA
BLUEPRINT_T-cell	TRIM40	NA
Bossini-Castillo_2019_Treg_naive	TRIM40	NA
Braineac2_putamen	TRIM40	0.0819458
Braineac2_substantia_nigra	TRIM40	0.084367
BrainSeq_brain	TRIM40	NA
CAP_LCL_naive	TRIM40	NA
CAP_LCL_statin	TRIM40	NA
CommonMind_DLPFC_naive	TRIM40	NA
FUSION_muscle_naive	TRIM40	NA
FUSION_adipose_naive	TRIM40	NA
GENCORD_LCL	TRIM40	NA
GENCORD_fibroblast	TRIM40	NA
GENCORD_T-cell	TRIM40	NA
GEUVADIS_LCL	TRIM40	NA
GTEx_adipose_subcutaneous	TRIM40	NA
GTEx_adipose_visceral	TRIM40	NA
GTEx_adrenal_gland	TRIM40	NA
GTEx_artery_aorta	TRIM40	NA
GTEx_artery_coronary	TRIM40	NA
GTEx_artery_tibial	TRIM40	NA
GTEx_brain_amygdala	TRIM40	NA
GTEx_brain_anterior_cingulate_cortex	TRIM40	NA
GTEx_brain_caudate	TRIM40	NA
GTEx_brain_cerebellar_hemisphere	TRIM40	NA
GTEx_brain_cerebellum	TRIM40	NA
GTEx_brain_cortex	TRIM40	NA
GTEx_brain_frontal_cortex	TRIM40	NA
GTEx_brain_hippocampus	TRIM40	NA
GTEx_brain_hypothalamus	TRIM40	NA
GTEx_brain_nucleus_accumbens	TRIM40	NA
GTEx_brain_putamen	TRIM40	NA
GTEx_brain_spinal_cord	TRIM40	NA
GTEx_brain_substantia_nigra	TRIM40	NA
GTEx_breast	TRIM40	NA
GTEx_fibroblast	TRIM40	NA
GTEx_LCL	TRIM40	NA
GTEx_colon_sigmoid	TRIM40	0.0744929
GTEx_colon_transverse	TRIM40	0.35804
GTEx_esophagus_gej	TRIM40	NA
GTEx_esophagus_mucosa	TRIM40	NA
GTEx_esophagus_muscularis	TRIM40	NA
GTEx_heart_atrial_appendage	TRIM40	NA
GTEx_heart_left_ventricle	TRIM40	NA
GTEx_kidney_cortex	TRIM40	0.106655
GTEx_liver	TRIM40	0.0849824
GTEx_lung	TRIM40	NA
GTEx_minor_salivary_gland	TRIM40	NA
GTEx_muscle	TRIM40	NA
GTEx_nerve_tibial	TRIM40	NA
GTEx_ovary	TRIM40	NA
GTEx_pancreas	TRIM40	NA
GTEx_pituitary	TRIM40	NA
GTEx_prostate	TRIM40	NA
GTEx_skin_not_sun_exposed	TRIM40	NA
GTEx_skin_sun_exposed	TRIM40	NA
GTEx_small_intestine	TRIM40	0.105438
GTEx_spleen	TRIM40	NA
GTEx_stomach	TRIM40	0.120357
GTEx_testis	TRIM40	0.366937
GTEx_thyroid	TRIM40	NA
GTEx_uterus	TRIM40	NA
GTEx_vagina	TRIM40	NA
GTEx_blood	TRIM40	NA
HipSci_iPSC	TRIM40	NA
iPSCORE_iPSC	TRIM40	NA
Lepik_2017_blood	TRIM40	0.301311
Nedelec_2016_macrophage_Listeria	TRIM40	NA
Nedelec_2016_macrophage_naive	TRIM40	NA
Nedelec_2016_macrophage_Salmonella	TRIM40	NA
Peng_2018_placenta_naive	TRIM40	0.277588
PhLiPS_iPSC	TRIM40	NA
PhLiPS_HLC	TRIM40	NA
Quach_2016_monocyte_naive	TRIM40	NA
Quach_2016_monocyte_LPS	TRIM40	NA
Quach_2016_monocyte_Pam3CSK4	TRIM40	NA
Quach_2016_monocyte_R848	TRIM40	NA
Quach_2016_monocyte_IAV	TRIM40	0.11151
ROSMAP_brain_naive	TRIM40	NA
Schmiedel_2018_Tfh_memory	TRIM40	NA
Schmiedel_2018_Th17_memory	TRIM40	NA
Schmiedel_2018_Th1_memory	TRIM40	NA
Schmiedel_2018_Th2_memory	TRIM40	NA
Schmiedel_2018_Th1-17_memory	TRIM40	NA
Schmiedel_2018_Treg_memory	TRIM40	NA
Schmiedel_2018_Treg_naive	TRIM40	NA
Schmiedel_2018_B-cell_naive	TRIM40	NA
Schmiedel_2018_CD4_T-cell_naive	TRIM40	NA
Schmiedel_2018_CD4_T-cell_anti-CD3-CD28	TRIM40	NA
Schmiedel_2018_CD8_T-cell_naive	TRIM40	NA
Schmiedel_2018_CD8_T-cell_anti-CD3-CD28	TRIM40	NA
Schmiedel_2018_monocyte_CD16_naive	TRIM40	NA
Schmiedel_2018_monocyte_naive	TRIM40	NA
Schmiedel_2018_NK-cell_naive	TRIM40	NA
Schwartzentruber_2018_sensory_neuron	TRIM40	NA
Steinberg_2020_synovium_naive	TRIM40	NA
Steinberg_2020_low_grade_cartilage_naive	TRIM40	NA
Steinberg_2020_high_grade_cartilage_naive	TRIM40	NA
TwinsUK_fat	TRIM40	NA
TwinsUK_LCL	TRIM40	NA
TwinsUK_skin	TRIM40	NA
TwinsUK_blood	TRIM40	NA
van_de_Bunt_2015_pancreatic_islet	TRIM40	NA
Young_2019_microglia_naive	TRIM40	NA
Alasoo_2018_macrophage_naive	TRIM10	NA
Alasoo_2018_macrophage_IFNg	TRIM10	0.0972035
Alasoo_2018_macrophage_Salmonella	TRIM10	NA
Alasoo_2018_macrophage_IFNg+Salmonella	TRIM10	NA
BLUEPRINT_monocyte	TRIM10	NA
BLUEPRINT_neutrophil	TRIM10	NA
BLUEPRINT_T-cell	TRIM10	NA
Bossini-Castillo_2019_Treg_naive	TRIM10	NA
Braineac2_putamen	TRIM10	0.0852303
Braineac2_substantia_nigra	TRIM10	0.083653
BrainSeq_brain	TRIM10	NA
CAP_LCL_naive	TRIM10	NA
CAP_LCL_statin	TRIM10	NA
CommonMind_DLPFC_naive	TRIM10	NA
FUSION_muscle_naive	TRIM10	NA
FUSION_adipose_naive	TRIM10	NA
GENCORD_LCL	TRIM10	NA
GENCORD_fibroblast	TRIM10	NA
GENCORD_T-cell	TRIM10	NA
GEUVADIS_LCL	TRIM10	NA
GTEx_adipose_subcutaneous	TRIM10	NA
GTEx_adipose_visceral	TRIM10	NA
GTEx_adrenal_gland	TRIM10	NA
GTEx_artery_aorta	TRIM10	NA
GTEx_artery_coronary	TRIM10	NA
GTEx_artery_tibial	TRIM10	NA
GTEx_brain_amygdala	TRIM10	NA
GTEx_brain_anterior_cingulate_cortex	TRIM10	NA
GTEx_brain_caudate	TRIM10	NA
GTEx_brain_cerebellar_hemisphere	TRIM10	NA
GTEx_brain_cerebellum	TRIM10	NA
GTEx_brain_cortex	TRIM10	NA
GTEx_brain_frontal_cortex	TRIM10	NA
GTEx_brain_hippocampus	TRIM10	NA
GTEx_brain_hypothalamus	TRIM10	NA
GTEx_brain_nucleus_accumbens	TRIM10	NA
GTEx_brain_putamen	TRIM10	NA
GTEx_brain_spinal_cord	TRIM10	NA
GTEx_brain_substantia_nigra	TRIM10	NA
GTEx_breast	TRIM10	NA
GTEx_fibroblast	TRIM10	NA
GTEx_LCL	TRIM10	NA
GTEx_colon_sigmoid	TRIM10	0.0909487
GTEx_colon_transverse	TRIM10	0.0859829
GTEx_esophagus_gej	TRIM10	0.082514
GTEx_esophagus_mucosa	TRIM10	NA
GTEx_esophagus_muscularis	TRIM10	0.0810869
GTEx_heart_atrial_appendage	TRIM10	NA
GTEx_heart_left_ventricle	TRIM10	NA
GTEx_kidney_cortex	TRIM10	0.100788
GTEx_liver	TRIM10	0.125741
GTEx_lung	TRIM10	0.0821744
GTEx_minor_salivary_gland	TRIM10	NA
GTEx_muscle	TRIM10	NA
GTEx_nerve_tibial	TRIM10	NA
GTEx_ovary	TRIM10	NA
GTEx_pancreas	TRIM10	NA
GTEx_pituitary	TRIM10	NA
GTEx_prostate	TRIM10	NA
GTEx_skin_not_sun_exposed	TRIM10	0.107812
GTEx_skin_sun_exposed	TRIM10	0.23918
GTEx_small_intestine	TRIM10	0.0990978
GTEx_spleen	TRIM10	0.0899087
GTEx_stomach	TRIM10	NA
GTEx_testis	TRIM10	NA
GTEx_thyroid	TRIM10	NA
GTEx_uterus	TRIM10	NA
GTEx_vagina	TRIM10	NA
GTEx_blood	TRIM10	0.122396
HipSci_iPSC	TRIM10	NA
iPSCORE_iPSC	TRIM10	NA
Lepik_2017_blood	TRIM10	0.558502
Nedelec_2016_macrophage_Listeria	TRIM10	NA
Nedelec_2016_macrophage_naive	TRIM10	NA
Nedelec_2016_macrophage_Salmonella	TRIM10	NA
Peng_2018_placenta_naive	TRIM10	0.0850876
PhLiPS_iPSC	TRIM10	NA
PhLiPS_HLC	TRIM10	NA
Quach_2016_monocyte_naive	TRIM10	NA
Quach_2016_monocyte_LPS	TRIM10	NA
Quach_2016_monocyte_Pam3CSK4	TRIM10	NA
Quach_2016_monocyte_R848	TRIM10	NA
Quach_2016_monocyte_IAV	TRIM10	NA
ROSMAP_brain_naive	TRIM10	NA
Schmiedel_2018_Tfh_memory	TRIM10	NA
Schmiedel_2018_Th17_memory	TRIM10	NA
Schmiedel_2018_Th1_memory	TRIM10	NA
Schmiedel_2018_Th2_memory	TRIM10	NA
Schmiedel_2018_Th1-17_memory	TRIM10	NA
Schmiedel_2018_Treg_memory	TRIM10	NA
Schmiedel_2018_Treg_naive	TRIM10	NA
Schmiedel_2018_B-cell_naive	TRIM10	NA
Schmiedel_2018_CD4_T-cell_naive	TRIM10	NA
Schmiedel_2018_CD4_T-cell_anti-CD3-CD28	TRIM10	NA
Schmiedel_2018_CD8_T-cell_naive	TRIM10	NA
Schmiedel_2018_CD8_T-cell_anti-CD3-CD28	TRIM10	NA
Schmiedel_2018_monocyte_CD16_naive	TRIM10	NA
Schmiedel_2018_monocyte_naive	TRIM10	NA
Schmiedel_2018_NK-cell_naive	TRIM10	NA
Schwartzentruber_2018_sensory_neuron	TRIM10	NA
Steinberg_2020_synovium_naive	TRIM10	0.0855754
Steinberg_2020_low_grade_cartilage_naive	TRIM10	NA
Steinberg_2020_high_grade_cartilage_naive	TRIM10	NA
TwinsUK_fat	TRIM10	NA
TwinsUK_LCL	TRIM10	NA
TwinsUK_skin	TRIM10	0.235807
TwinsUK_blood	TRIM10	0.237685
van_de_Bunt_2015_pancreatic_islet	TRIM10	NA
Young_2019_microglia_naive	TRIM10	NA
Alasoo_2018_macrophage_naive	TRIM15	NA
Alasoo_2018_macrophage_IFNg	TRIM15	0.0875175
Alasoo_2018_macrophage_Salmonella	TRIM15	NA
Alasoo_2018_macrophage_IFNg+Salmonella	TRIM15	NA
BLUEPRINT_monocyte	TRIM15	NA
BLUEPRINT_neutrophil	TRIM15	NA
BLUEPRINT_T-cell	TRIM15	NA
Bossini-Castillo_2019_Treg_naive	TRIM15	NA
Braineac2_putamen	TRIM15	0.0797412
Braineac2_substantia_nigra	TRIM15	NA
BrainSeq_brain	TRIM15	NA
CAP_LCL_naive	TRIM15	NA
CAP_LCL_statin	TRIM15	NA
CommonMind_DLPFC_naive	TRIM15	NA
FUSION_muscle_naive	TRIM15	NA
FUSION_adipose_naive	TRIM15	NA
GENCORD_LCL	TRIM15	NA
GENCORD_fibroblast	TRIM15	NA
GENCORD_T-cell	TRIM15	NA
GEUVADIS_LCL	TRIM15	NA
GTEx_adipose_subcutaneous	TRIM15	NA
GTEx_adipose_visceral	TRIM15	NA
GTEx_adrenal_gland	TRIM15	NA
GTEx_artery_aorta	TRIM15	NA
GTEx_artery_coronary	TRIM15	NA
GTEx_artery_tibial	TRIM15	NA
GTEx_brain_amygdala	TRIM15	NA
GTEx_brain_anterior_cingulate_cortex	TRIM15	NA
GTEx_brain_caudate	TRIM15	NA
GTEx_brain_cerebellar_hemisphere	TRIM15	NA
GTEx_brain_cerebellum	TRIM15	NA
GTEx_brain_cortex	TRIM15	NA
GTEx_brain_frontal_cortex	TRIM15	NA
GTEx_brain_hippocampus	TRIM15	NA
GTEx_brain_hypothalamus	TRIM15	NA
GTEx_brain_nucleus_accumbens	TRIM15	NA
GTEx_brain_putamen	TRIM15	NA
GTEx_brain_spinal_cord	TRIM15	NA
GTEx_brain_substantia_nigra	TRIM15	NA
GTEx_breast	TRIM15	NA
GTEx_fibroblast	TRIM15	NA
GTEx_LCL	TRIM15	NA
GTEx_colon_sigmoid	TRIM15	0.114391
GTEx_colon_transverse	TRIM15	0.0861921
GTEx_esophagus_gej	TRIM15	NA
GTEx_esophagus_mucosa	TRIM15	NA
GTEx_esophagus_muscularis	TRIM15	NA
GTEx_heart_atrial_appendage	TRIM15	NA
GTEx_heart_left_ventricle	TRIM15	NA
GTEx_kidney_cortex	TRIM15	0.102783
GTEx_liver	TRIM15	0.082302
GTEx_lung	TRIM15	0.0923584
GTEx_minor_salivary_gland	TRIM15	NA
GTEx_muscle	TRIM15	NA
GTEx_nerve_tibial	TRIM15	NA
GTEx_ovary	TRIM15	NA
GTEx_pancreas	TRIM15	NA
GTEx_pituitary	TRIM15	NA
GTEx_prostate	TRIM15	NA
GTEx_skin_not_sun_exposed	TRIM15	0.0978718
GTEx_skin_sun_exposed	TRIM15	0.107002
GTEx_small_intestine	TRIM15	0.101906
GTEx_spleen	TRIM15	0.0988622
GTEx_stomach	TRIM15	0.121802
GTEx_testis	TRIM15	NA
GTEx_thyroid	TRIM15	NA
GTEx_uterus	TRIM15	NA
GTEx_vagina	TRIM15	NA
GTEx_blood	TRIM15	NA
HipSci_iPSC	TRIM15	NA
iPSCORE_iPSC	TRIM15	0.0992437
Lepik_2017_blood	TRIM15	NA
Nedelec_2016_macrophage_Listeria	TRIM15	NA
Nedelec_2016_macrophage_naive	TRIM15	NA
Nedelec_2016_macrophage_Salmonella	TRIM15	NA
Peng_2018_placenta_naive	TRIM15	0.150972
PhLiPS_iPSC	TRIM15	0.102804
PhLiPS_HLC	TRIM15	NA
Quach_2016_monocyte_naive	TRIM15	NA
Quach_2016_monocyte_LPS	TRIM15	NA
Quach_2016_monocyte_Pam3CSK4	TRIM15	NA
Quach_2016_monocyte_R848	TRIM15	NA
Quach_2016_monocyte_IAV	TRIM15	NA
ROSMAP_brain_naive	TRIM15	NA
Schmiedel_2018_Tfh_memory	TRIM15	NA
Schmiedel_2018_Th17_memory	TRIM15	NA
Schmiedel_2018_Th1_memory	TRIM15	NA
Schmiedel_2018_Th2_memory	TRIM15	NA
Schmiedel_2018_Th1-17_memory	TRIM15	NA
Schmiedel_2018_Treg_memory	TRIM15	NA
Schmiedel_2018_Treg_naive	TRIM15	NA
Schmiedel_2018_B-cell_naive	TRIM15	NA
Schmiedel_2018_CD4_T-cell_naive	TRIM15	NA
Schmiedel_2018_CD4_T-cell_anti-CD3-CD28	TRIM15	NA
Schmiedel_2018_CD8_T-cell_naive	TRIM15	NA
Schmiedel_2018_CD8_T-cell_anti-CD3-CD28	TRIM15	NA
Schmiedel_2018_monocyte_CD16_naive	TRIM15	NA
Schmiedel_2018_monocyte_naive	TRIM15	NA
Schmiedel_2018_NK-cell_naive	TRIM15	NA
Schwartzentruber_2018_sensory_neuron	TRIM15	NA
Steinberg_2020_synovium_naive	TRIM15	0.0917641
Steinberg_2020_low_grade_cartilage_naive	TRIM15	NA
Steinberg_2020_high_grade_cartilage_naive	TRIM15	NA
TwinsUK_fat	TRIM15	NA
TwinsUK_LCL	TRIM15	NA
TwinsUK_skin	TRIM15	0.0940053
TwinsUK_blood	TRIM15	NA
van_de_Bunt_2015_pancreatic_islet	TRIM15	0.0832862
Young_2019_microglia_naive	TRIM15	NA
Alasoo_2018_macrophage_naive	TRIM26	0.100694
Alasoo_2018_macrophage_IFNg	TRIM26	0.124652
Alasoo_2018_macrophage_Salmonella	TRIM26	0.0921088
Alasoo_2018_macrophage_IFNg+Salmonella	TRIM26	0.163512
BLUEPRINT_monocyte	TRIM26	0.400204
BLUEPRINT_neutrophil	TRIM26	0.305952
BLUEPRINT_T-cell	TRIM26	0.096231
Bossini-Castillo_2019_Treg_naive	TRIM26	0.323847
Braineac2_putamen	TRIM26	0.114425
Braineac2_substantia_nigra	TRIM26	0.0944247
BrainSeq_brain	TRIM26	0.545888
CAP_LCL_naive	TRIM26	0.173823
CAP_LCL_statin	TRIM26	0.115889
CommonMind_DLPFC_naive	TRIM26	0.748298
FUSION_muscle_naive	TRIM26	0.414511
FUSION_adipose_naive	TRIM26	0.48305
GENCORD_LCL	TRIM26	0.325172
GENCORD_fibroblast	TRIM26	0.0957821
GENCORD_T-cell	TRIM26	0.0892308
GEUVADIS_LCL	TRIM26	0.10691
GTEx_adipose_subcutaneous	TRIM26	0.150683
GTEx_adipose_visceral	TRIM26	0.122756
GTEx_adrenal_gland	TRIM26	0.0942263
GTEx_artery_aorta	TRIM26	0.343095
GTEx_artery_coronary	TRIM26	0.104663
GTEx_artery_tibial	TRIM26	0.510959
GTEx_brain_amygdala	TRIM26	0.0965344
GTEx_brain_anterior_cingulate_cortex	TRIM26	0.125185
GTEx_brain_caudate	TRIM26	0.10671
GTEx_brain_cerebellar_hemisphere	TRIM26	0.434134
GTEx_brain_cerebellum	TRIM26	0.466841
GTEx_brain_cortex	TRIM26	0.22148
GTEx_brain_frontal_cortex	TRIM26	0.120965
GTEx_brain_hippocampus	TRIM26	0.0975313
GTEx_brain_hypothalamus	TRIM26	0.101882
GTEx_brain_nucleus_accumbens	TRIM26	0.0951626
GTEx_brain_putamen	TRIM26	0.113124
GTEx_brain_spinal_cord	TRIM26	0.108283
GTEx_brain_substantia_nigra	TRIM26	0.0959906
GTEx_breast	TRIM26	0.0962532
GTEx_fibroblast	TRIM26	0.138372
GTEx_LCL	TRIM26	0.0878371
GTEx_colon_sigmoid	TRIM26	0.0990794
GTEx_colon_transverse	TRIM26	0.0880449
GTEx_esophagus_gej	TRIM26	0.190788
GTEx_esophagus_mucosa	TRIM26	0.214217
GTEx_esophagus_muscularis	TRIM26	0.848141
GTEx_heart_atrial_appendage	TRIM26	0.1391
GTEx_heart_left_ventricle	TRIM26	0.0898159
GTEx_kidney_cortex	TRIM26	0.0972074
GTEx_liver	TRIM26	0.0825988
GTEx_lung	TRIM26	0.085641
GTEx_minor_salivary_gland	TRIM26	0.12252
GTEx_muscle	TRIM26	0.635999
GTEx_nerve_tibial	TRIM26	0.52478
GTEx_ovary	TRIM26	0.100974
GTEx_pancreas	TRIM26	0.455004
GTEx_pituitary	TRIM26	0.0893605
GTEx_prostate	TRIM26	0.117169
GTEx_skin_not_sun_exposed	TRIM26	0.213216
GTEx_skin_sun_exposed	TRIM26	0.137724
GTEx_small_intestine	TRIM26	0.118684
GTEx_spleen	TRIM26	0.106286
GTEx_stomach	TRIM26	0.0992051
GTEx_testis	TRIM26	0.692861
GTEx_thyroid	TRIM26	0.358072
GTEx_uterus	TRIM26	0.101898
GTEx_vagina	TRIM26	0.0852903
GTEx_blood	TRIM26	0.135251
HipSci_iPSC	TRIM26	0.119125
iPSCORE_iPSC	TRIM26	0.09906
Lepik_2017_blood	TRIM26	0.427994
Nedelec_2016_macrophage_Listeria	TRIM26	0.0965878
Nedelec_2016_macrophage_naive	TRIM26	0.0839291
Nedelec_2016_macrophage_Salmonella	TRIM26	0.0964027
Peng_2018_placenta_naive	TRIM26	0.0926689
PhLiPS_iPSC	TRIM26	0.104421
PhLiPS_HLC	TRIM26	0.0950814
Quach_2016_monocyte_naive	TRIM26	0.138362
Quach_2016_monocyte_LPS	TRIM26	0.55531
Quach_2016_monocyte_Pam3CSK4	TRIM26	0.425418
Quach_2016_monocyte_R848	TRIM26	0.242831
Quach_2016_monocyte_IAV	TRIM26	0.36067
ROSMAP_brain_naive	TRIM26	0.579616
Schmiedel_2018_Tfh_memory	TRIM26	0.105089
Schmiedel_2018_Th17_memory	TRIM26	0.09084
Schmiedel_2018_Th1_memory	TRIM26	0.0995614
Schmiedel_2018_Th2_memory	TRIM26	0.0941898
Schmiedel_2018_Th1-17_memory	TRIM26	0.100036
Schmiedel_2018_Treg_memory	TRIM26	0.102713
Schmiedel_2018_Treg_naive	TRIM26	0.0899628
Schmiedel_2018_B-cell_naive	TRIM26	0.10512
Schmiedel_2018_CD4_T-cell_naive	TRIM26	0.104147
Schmiedel_2018_CD4_T-cell_anti-CD3-CD28	TRIM26	0.0913909
Schmiedel_2018_CD8_T-cell_naive	TRIM26	0.0963582
Schmiedel_2018_CD8_T-cell_anti-CD3-CD28	TRIM26	0.0950046
Schmiedel_2018_monocyte_CD16_naive	TRIM26	0.0952863
Schmiedel_2018_monocyte_naive	TRIM26	0.0853812
Schmiedel_2018_NK-cell_naive	TRIM26	0.0938223
Schwartzentruber_2018_sensory_neuron	TRIM26	0.107879
Steinberg_2020_synovium_naive	TRIM26	0.093358
Steinberg_2020_low_grade_cartilage_naive	TRIM26	0.105117
Steinberg_2020_high_grade_cartilage_naive	TRIM26	0.0977263
TwinsUK_fat	TRIM26	0.455079
TwinsUK_LCL	TRIM26	0.884285
TwinsUK_skin	TRIM26	0.38065
TwinsUK_blood	TRIM26	0.161176
van_de_Bunt_2015_pancreatic_islet	TRIM26	0.102495
Young_2019_microglia_naive	TRIM26	0.0877023
Alasoo_2018_macrophage_naive	TRIM39	0.152228
Alasoo_2018_macrophage_IFNg	TRIM39	0.129163
Alasoo_2018_macrophage_Salmonella	TRIM39	0.0946758
Alasoo_2018_macrophage_IFNg+Salmonella	TRIM39	0.113105
BLUEPRINT_monocyte	TRIM39	0.110828
BLUEPRINT_neutrophil	TRIM39	0.107241
BLUEPRINT_T-cell	TRIM39	0.186543
Bossini-Castillo_2019_Treg_naive	TRIM39	0.111544
Braineac2_putamen	TRIM39	0.114701
Braineac2_substantia_nigra	TRIM39	0.103947
BrainSeq_brain	TRIM39	0.0874913
CAP_LCL_naive	TRIM39	0.112018
CAP_LCL_statin	TRIM39	0.106456
CommonMind_DLPFC_naive	TRIM39	0.0929197
FUSION_muscle_naive	TRIM39	0.112683
FUSION_adipose_naive	TRIM39	0.0905329
GENCORD_LCL	TRIM39	0.104967
GENCORD_fibroblast	TRIM39	0.169689
GENCORD_T-cell	TRIM39	0.112303
GEUVADIS_LCL	TRIM39	0.112101
GTEx_adipose_subcutaneous	TRIM39	0.285883
GTEx_adipose_visceral	TRIM39	0.0991361
GTEx_adrenal_gland	TRIM39	0.115185
GTEx_artery_aorta	TRIM39	0.167454
GTEx_artery_coronary	TRIM39	0.0985162
GTEx_artery_tibial	TRIM39	0.0898054
GTEx_brain_amygdala	TRIM39	0.0931656
GTEx_brain_anterior_cingulate_cortex	TRIM39	0.097704
GTEx_brain_caudate	TRIM39	0.138243
GTEx_brain_cerebellar_hemisphere	TRIM39	0.105177
GTEx_brain_cerebellum	TRIM39	0.280655
GTEx_brain_cortex	TRIM39	0.0976393
GTEx_brain_frontal_cortex	TRIM39	0.0962188
GTEx_brain_hippocampus	TRIM39	0.129344
GTEx_brain_hypothalamus	TRIM39	0.108526
GTEx_brain_nucleus_accumbens	TRIM39	0.0899174
GTEx_brain_putamen	TRIM39	0.110473
GTEx_brain_spinal_cord	TRIM39	0.102395
GTEx_brain_substantia_nigra	TRIM39	0.101257
GTEx_breast	TRIM39	0.0885347
GTEx_fibroblast	TRIM39	0.131948
GTEx_LCL	TRIM39	0.0947835
GTEx_colon_sigmoid	TRIM39	0.0875224
GTEx_colon_transverse	TRIM39	0.130687
GTEx_esophagus_gej	TRIM39	0.0970553
GTEx_esophagus_mucosa	TRIM39	0.138026
GTEx_esophagus_muscularis	TRIM39	0.102836
GTEx_heart_atrial_appendage	TRIM39	0.0885823
GTEx_heart_left_ventricle	TRIM39	0.0922309
GTEx_kidney_cortex	TRIM39	0.108322
GTEx_liver	TRIM39	0.151237
GTEx_lung	TRIM39	0.0912494
GTEx_minor_salivary_gland	TRIM39	0.107433
GTEx_muscle	TRIM39	0.10901
GTEx_nerve_tibial	TRIM39	0.0862827
GTEx_ovary	TRIM39	0.110205
GTEx_pancreas	TRIM39	0.148983
GTEx_pituitary	TRIM39	0.109211
GTEx_prostate	TRIM39	0.11399
GTEx_skin_not_sun_exposed	TRIM39	0.126534
GTEx_skin_sun_exposed	TRIM39	0.133874
GTEx_small_intestine	TRIM39	0.13526
GTEx_spleen	TRIM39	0.125557
GTEx_stomach	TRIM39	0.0873047
GTEx_testis	TRIM39	0.0931702
GTEx_thyroid	TRIM39	0.110347
GTEx_uterus	TRIM39	0.10666
GTEx_vagina	TRIM39	0.112448
GTEx_blood	TRIM39	0.107372
HipSci_iPSC	TRIM39	0.377079
iPSCORE_iPSC	TRIM39	0.105282
Lepik_2017_blood	TRIM39	0.144383
Nedelec_2016_macrophage_Listeria	TRIM39	0.111766
Nedelec_2016_macrophage_naive	TRIM39	0.0970611
Nedelec_2016_macrophage_Salmonella	TRIM39	0.119935
Peng_2018_placenta_naive	TRIM39	0.108397
PhLiPS_iPSC	TRIM39	0.106159
PhLiPS_HLC	TRIM39	0.11222
Quach_2016_monocyte_naive	TRIM39	0.101636
Quach_2016_monocyte_LPS	TRIM39	0.133906
Quach_2016_monocyte_Pam3CSK4	TRIM39	0.102682
Quach_2016_monocyte_R848	TRIM39	0.107765
Quach_2016_monocyte_IAV	TRIM39	0.104048
ROSMAP_brain_naive	TRIM39	0.102709
Schmiedel_2018_Tfh_memory	TRIM39	0.326541
Schmiedel_2018_Th17_memory	TRIM39	0.111654
Schmiedel_2018_Th1_memory	TRIM39	0.100605
Schmiedel_2018_Th2_memory	TRIM39	0.115384
Schmiedel_2018_Th1-17_memory	TRIM39	0.109176
Schmiedel_2018_Treg_memory	TRIM39	0.109215
Schmiedel_2018_Treg_naive	TRIM39	0.100261
Schmiedel_2018_B-cell_naive	TRIM39	0.0965712
Schmiedel_2018_CD4_T-cell_naive	TRIM39	0.116255
Schmiedel_2018_CD4_T-cell_anti-CD3-CD28	TRIM39	0.10525
Schmiedel_2018_CD8_T-cell_naive	TRIM39	0.105494
Schmiedel_2018_CD8_T-cell_anti-CD3-CD28	TRIM39	0.126502
Schmiedel_2018_monocyte_CD16_naive	TRIM39	0.102858
Schmiedel_2018_monocyte_naive	TRIM39	0.112809
Schmiedel_2018_NK-cell_naive	TRIM39	0.108828
Schwartzentruber_2018_sensory_neuron	TRIM39	0.105731
Steinberg_2020_synovium_naive	TRIM39	0.0972166
Steinberg_2020_low_grade_cartilage_naive	TRIM39	0.103069
Steinberg_2020_high_grade_cartilage_naive	TRIM39	0.111733
TwinsUK_fat	TRIM39	0.133046
TwinsUK_LCL	TRIM39	0.0772466
TwinsUK_skin	TRIM39	0.12424
TwinsUK_blood	TRIM39	0.101762
van_de_Bunt_2015_pancreatic_islet	TRIM39	0.102525
Young_2019_microglia_naive	TRIM39	0.105227
Alasoo_2018_macrophage_naive	TRIM39-RPP21	NA
Alasoo_2018_macrophage_IFNg	TRIM39-RPP21	NA
Alasoo_2018_macrophage_Salmonella	TRIM39-RPP21	NA
Alasoo_2018_macrophage_IFNg+Salmonella	TRIM39-RPP21	NA
BLUEPRINT_monocyte	TRIM39-RPP21	NA
BLUEPRINT_neutrophil	TRIM39-RPP21	NA
BLUEPRINT_T-cell	TRIM39-RPP21	NA
Bossini-Castillo_2019_Treg_naive	TRIM39-RPP21	NA
Braineac2_putamen	TRIM39-RPP21	NA
Braineac2_substantia_nigra	TRIM39-RPP21	NA
BrainSeq_brain	TRIM39-RPP21	NA
CAP_LCL_naive	TRIM39-RPP21	NA
CAP_LCL_statin	TRIM39-RPP21	NA
CommonMind_DLPFC_naive	TRIM39-RPP21	NA
FUSION_muscle_naive	TRIM39-RPP21	NA
FUSION_adipose_naive	TRIM39-RPP21	NA
GENCORD_LCL	TRIM39-RPP21	NA
GENCORD_fibroblast	TRIM39-RPP21	NA
GENCORD_T-cell	TRIM39-RPP21	NA
GEUVADIS_LCL	TRIM39-RPP21	NA
GTEx_adipose_subcutaneous	TRIM39-RPP21	NA
GTEx_adipose_visceral	TRIM39-RPP21	NA
GTEx_adrenal_gland	TRIM39-RPP21	NA
GTEx_artery_aorta	TRIM39-RPP21	NA
GTEx_artery_coronary	TRIM39-RPP21	NA
GTEx_artery_tibial	TRIM39-RPP21	NA
GTEx_brain_amygdala	TRIM39-RPP21	NA
GTEx_brain_anterior_cingulate_cortex	TRIM39-RPP21	NA
GTEx_brain_caudate	TRIM39-RPP21	NA
GTEx_brain_cerebellar_hemisphere	TRIM39-RPP21	NA
GTEx_brain_cerebellum	TRIM39-RPP21	NA
GTEx_brain_cortex	TRIM39-RPP21	NA
GTEx_brain_frontal_cortex	TRIM39-RPP21	NA
GTEx_brain_hippocampus	TRIM39-RPP21	NA
GTEx_brain_hypothalamus	TRIM39-RPP21	NA
GTEx_brain_nucleus_accumbens	TRIM39-RPP21	NA
GTEx_brain_putamen	TRIM39-RPP21	NA
GTEx_brain_spinal_cord	TRIM39-RPP21	NA
GTEx_brain_substantia_nigra	TRIM39-RPP21	NA
GTEx_breast	TRIM39-RPP21	NA
GTEx_fibroblast	TRIM39-RPP21	NA
GTEx_LCL	TRIM39-RPP21	NA
GTEx_colon_sigmoid	TRIM39-RPP21	NA
GTEx_colon_transverse	TRIM39-RPP21	NA
GTEx_esophagus_gej	TRIM39-RPP21	NA
GTEx_esophagus_mucosa	TRIM39-RPP21	NA
GTEx_esophagus_muscularis	TRIM39-RPP21	NA
GTEx_heart_atrial_appendage	TRIM39-RPP21	NA
GTEx_heart_left_ventricle	TRIM39-RPP21	NA
GTEx_kidney_cortex	TRIM39-RPP21	NA
GTEx_liver	TRIM39-RPP21	NA
GTEx_lung	TRIM39-RPP21	NA
GTEx_minor_salivary_gland	TRIM39-RPP21	NA
GTEx_muscle	TRIM39-RPP21	NA
GTEx_nerve_tibial	TRIM39-RPP21	NA
GTEx_ovary	TRIM39-RPP21	NA
GTEx_pancreas	TRIM39-RPP21	NA
GTEx_pituitary	TRIM39-RPP21	NA
GTEx_prostate	TRIM39-RPP21	NA
GTEx_skin_not_sun_exposed	TRIM39-RPP21	NA
GTEx_skin_sun_exposed	TRIM39-RPP21	NA
GTEx_small_intestine	TRIM39-RPP21	NA
GTEx_spleen	TRIM39-RPP21	NA
GTEx_stomach	TRIM39-RPP21	NA
GTEx_testis	TRIM39-RPP21	0.0931916
GTEx_thyroid	TRIM39-RPP21	NA
GTEx_uterus	TRIM39-RPP21	NA
GTEx_vagina	TRIM39-RPP21	NA
GTEx_blood	TRIM39-RPP21	NA
HipSci_iPSC	TRIM39-RPP21	NA
iPSCORE_iPSC	TRIM39-RPP21	NA
Lepik_2017_blood	TRIM39-RPP21	NA
Nedelec_2016_macrophage_Listeria	TRIM39-RPP21	NA
Nedelec_2016_macrophage_naive	TRIM39-RPP21	NA
Nedelec_2016_macrophage_Salmonella	TRIM39-RPP21	NA
Peng_2018_placenta_naive	TRIM39-RPP21	NA
PhLiPS_iPSC	TRIM39-RPP21	NA
PhLiPS_HLC	TRIM39-RPP21	NA
Quach_2016_monocyte_naive	TRIM39-RPP21	NA
Quach_2016_monocyte_LPS	TRIM39-RPP21	NA
Quach_2016_monocyte_Pam3CSK4	TRIM39-RPP21	NA
Quach_2016_monocyte_R848	TRIM39-RPP21	NA
Quach_2016_monocyte_IAV	TRIM39-RPP21	NA
ROSMAP_brain_naive	TRIM39-RPP21	NA
Schmiedel_2018_Tfh_memory	TRIM39-RPP21	NA
Schmiedel_2018_Th17_memory	TRIM39-RPP21	NA
Schmiedel_2018_Th1_memory	TRIM39-RPP21	NA
Schmiedel_2018_Th2_memory	TRIM39-RPP21	NA
Schmiedel_2018_Th1-17_memory	TRIM39-RPP21	NA
Schmiedel_2018_Treg_memory	TRIM39-RPP21	NA
Schmiedel_2018_Treg_naive	TRIM39-RPP21	NA
Schmiedel_2018_B-cell_naive	TRIM39-RPP21	NA
Schmiedel_2018_CD4_T-cell_naive	TRIM39-RPP21	NA
Schmiedel_2018_CD4_T-cell_anti-CD3-CD28	TRIM39-RPP21	NA
Schmiedel_2018_CD8_T-cell_naive	TRIM39-RPP21	NA
Schmiedel_2018_CD8_T-cell_anti-CD3-CD28	TRIM39-RPP21	NA
Schmiedel_2018_monocyte_CD16_naive	TRIM39-RPP21	NA
Schmiedel_2018_monocyte_naive	TRIM39-RPP21	NA
Schmiedel_2018_NK-cell_naive	TRIM39-RPP21	NA
Schwartzentruber_2018_sensory_neuron	TRIM39-RPP21	NA
Steinberg_2020_synovium_naive	TRIM39-RPP21	NA
Steinberg_2020_low_grade_cartilage_naive	TRIM39-RPP21	NA
Steinberg_2020_high_grade_cartilage_naive	TRIM39-RPP21	NA
TwinsUK_fat	TRIM39-RPP21	NA
TwinsUK_LCL	TRIM39-RPP21	NA
TwinsUK_skin	TRIM39-RPP21	NA
TwinsUK_blood	TRIM39-RPP21	NA
van_de_Bunt_2015_pancreatic_islet	TRIM39-RPP21	NA
Young_2019_microglia_naive	TRIM39-RPP21	NA
Alasoo_2018_macrophage_naive	RPP21	0.104225
Alasoo_2018_macrophage_IFNg	RPP21	0.112678
Alasoo_2018_macrophage_Salmonella	RPP21	0.112396
Alasoo_2018_macrophage_IFNg+Salmonella	RPP21	NA
BLUEPRINT_monocyte	RPP21	0.352681
BLUEPRINT_neutrophil	RPP21	0.111618
BLUEPRINT_T-cell	RPP21	0.374106
Bossini-Castillo_2019_Treg_naive	RPP21	0.112275
Braineac2_putamen	RPP21	0.184443
Braineac2_substantia_nigra	RPP21	0.108809
BrainSeq_brain	RPP21	0.285404
CAP_LCL_naive	RPP21	0.106638
CAP_LCL_statin	RPP21	0.131815
CommonMind_DLPFC_naive	RPP21	0.531724
FUSION_muscle_naive	RPP21	0.380909
FUSION_adipose_naive	RPP21	0.380961
GENCORD_LCL	RPP21	0.111002
GENCORD_fibroblast	RPP21	0.124775
GENCORD_T-cell	RPP21	0.11278
GEUVADIS_LCL	RPP21	0.42562
GTEx_adipose_subcutaneous	RPP21	0.380572
GTEx_adipose_visceral	RPP21	0.378395
GTEx_adrenal_gland	RPP21	0.227892
GTEx_artery_aorta	RPP21	0.163319
GTEx_artery_coronary	RPP21	0.133248
GTEx_artery_tibial	RPP21	0.375176
GTEx_brain_amygdala	RPP21	0.159217
GTEx_brain_anterior_cingulate_cortex	RPP21	0.154019
GTEx_brain_caudate	RPP21	0.380777
GTEx_brain_cerebellar_hemisphere	RPP21	0.380787
GTEx_brain_cerebellum	RPP21	0.380347
GTEx_brain_cortex	RPP21	0.380085
GTEx_brain_frontal_cortex	RPP21	0.167637
GTEx_brain_hippocampus	RPP21	0.375795
GTEx_brain_hypothalamus	RPP21	0.494902
GTEx_brain_nucleus_accumbens	RPP21	0.380449
GTEx_brain_putamen	RPP21	0.378776
GTEx_brain_spinal_cord	RPP21	0.112096
GTEx_brain_substantia_nigra	RPP21	0.158613
GTEx_breast	RPP21	0.185023
GTEx_fibroblast	RPP21	0.698192
GTEx_LCL	RPP21	0.19916
GTEx_colon_sigmoid	RPP21	0.380365
GTEx_colon_transverse	RPP21	0.639858
GTEx_esophagus_gej	RPP21	0.364511
GTEx_esophagus_mucosa	RPP21	0.380083
GTEx_esophagus_muscularis	RPP21	0.357295
GTEx_heart_atrial_appendage	RPP21	0.378684
GTEx_heart_left_ventricle	RPP21	0.179531
GTEx_kidney_cortex	RPP21	0.125166
GTEx_liver	RPP21	0.240079
GTEx_lung	RPP21	0.607113
GTEx_minor_salivary_gland	RPP21	0.114389
GTEx_muscle	RPP21	0.380348
GTEx_nerve_tibial	RPP21	0.380589
GTEx_ovary	RPP21	0.116569
GTEx_pancreas	RPP21	0.378319
GTEx_pituitary	RPP21	0.380333
GTEx_prostate	RPP21	0.160086
GTEx_skin_not_sun_exposed	RPP21	0.426946
GTEx_skin_sun_exposed	RPP21	0.375542
GTEx_small_intestine	RPP21	0.130471
GTEx_spleen	RPP21	0.183333
GTEx_stomach	RPP21	0.432184
GTEx_testis	RPP21	0.374164
GTEx_thyroid	RPP21	0.392968
GTEx_uterus	RPP21	0.116146
GTEx_vagina	RPP21	0.125952
GTEx_blood	RPP21	0.375769
HipSci_iPSC	RPP21	0.116311
iPSCORE_iPSC	RPP21	0.108382
Lepik_2017_blood	RPP21	0.293886
Nedelec_2016_macrophage_Listeria	RPP21	0.130928
Nedelec_2016_macrophage_naive	RPP21	0.151916
Nedelec_2016_macrophage_Salmonella	RPP21	0.128701
Peng_2018_placenta_naive	RPP21	0.117415
PhLiPS_iPSC	RPP21	0.114211
PhLiPS_HLC	RPP21	0.118386
Quach_2016_monocyte_naive	RPP21	0.271685
Quach_2016_monocyte_LPS	RPP21	0.107755
Quach_2016_monocyte_Pam3CSK4	RPP21	0.124946
Quach_2016_monocyte_R848	RPP21	0.254537
Quach_2016_monocyte_IAV	RPP21	0.296772
ROSMAP_brain_naive	RPP21	0.384339
Schmiedel_2018_Tfh_memory	RPP21	0.129409
Schmiedel_2018_Th17_memory	RPP21	0.123032
Schmiedel_2018_Th1_memory	RPP21	0.115256
Schmiedel_2018_Th2_memory	RPP21	0.123776
Schmiedel_2018_Th1-17_memory	RPP21	0.121915
Schmiedel_2018_Treg_memory	RPP21	0.130489
Schmiedel_2018_Treg_naive	RPP21	0.135724
Schmiedel_2018_B-cell_naive	RPP21	0.115953
Schmiedel_2018_CD4_T-cell_naive	RPP21	0.110634
Schmiedel_2018_CD4_T-cell_anti-CD3-CD28	RPP21	0.344255
Schmiedel_2018_CD8_T-cell_naive	RPP21	0.128542
Schmiedel_2018_CD8_T-cell_anti-CD3-CD28	RPP21	0.131221
Schmiedel_2018_monocyte_CD16_naive	RPP21	0.143637
Schmiedel_2018_monocyte_naive	RPP21	0.10772
Schmiedel_2018_NK-cell_naive	RPP21	0.14159
Schwartzentruber_2018_sensory_neuron	RPP21	0.107248
Steinberg_2020_synovium_naive	RPP21	0.114809
Steinberg_2020_low_grade_cartilage_naive	RPP21	0.126823
Steinberg_2020_high_grade_cartilage_naive	RPP21	0.108888
TwinsUK_fat	RPP21	0.112229
TwinsUK_LCL	RPP21	0.349968
TwinsUK_skin	RPP21	0.206682
TwinsUK_blood	RPP21	0.308528
van_de_Bunt_2015_pancreatic_islet	RPP21	0.104776
Young_2019_microglia_naive	RPP21	0.120647
Alasoo_2018_macrophage_naive	HLA-E	0.236436
Alasoo_2018_macrophage_IFNg	HLA-E	0.121187
Alasoo_2018_macrophage_Salmonella	HLA-E	0.122417
Alasoo_2018_macrophage_IFNg+Salmonella	HLA-E	0.123909
BLUEPRINT_monocyte	HLA-E	0.217617
BLUEPRINT_neutrophil	HLA-E	0.28538
BLUEPRINT_T-cell	HLA-E	0.221825
Bossini-Castillo_2019_Treg_naive	HLA-E	0.127239
Braineac2_putamen	HLA-E	0.13147
Braineac2_substantia_nigra	HLA-E	0.128215
BrainSeq_brain	HLA-E	0.175901
CAP_LCL_naive	HLA-E	0.121454
CAP_LCL_statin	HLA-E	0.120426
CommonMind_DLPFC_naive	HLA-E	0.228859
FUSION_muscle_naive	HLA-E	0.200398
FUSION_adipose_naive	HLA-E	0.207833
GENCORD_LCL	HLA-E	0.136986
GENCORD_fibroblast	HLA-E	0.134385
GENCORD_T-cell	HLA-E	0.123238
GEUVADIS_LCL	HLA-E	0.122051
GTEx_adipose_subcutaneous	HLA-E	0.251711
GTEx_adipose_visceral	HLA-E	0.218658
GTEx_adrenal_gland	HLA-E	0.123724
GTEx_artery_aorta	HLA-E	0.123129
GTEx_artery_coronary	HLA-E	0.126817
GTEx_artery_tibial	HLA-E	0.163016
GTEx_brain_amygdala	HLA-E	0.117036
GTEx_brain_anterior_cingulate_cortex	HLA-E	0.146268
GTEx_brain_caudate	HLA-E	0.115107
GTEx_brain_cerebellar_hemisphere	HLA-E	0.117289
GTEx_brain_cerebellum	HLA-E	0.127069
GTEx_brain_cortex	HLA-E	0.121821
GTEx_brain_frontal_cortex	HLA-E	0.124838
GTEx_brain_hippocampus	HLA-E	0.117781
GTEx_brain_hypothalamus	HLA-E	0.116276
GTEx_brain_nucleus_accumbens	HLA-E	0.200248
GTEx_brain_putamen	HLA-E	0.138485
GTEx_brain_spinal_cord	HLA-E	0.124947
GTEx_brain_substantia_nigra	HLA-E	0.190684
GTEx_breast	HLA-E	0.270266
GTEx_fibroblast	HLA-E	0.370917
GTEx_LCL	HLA-E	0.121341
GTEx_colon_sigmoid	HLA-E	0.203048
GTEx_colon_transverse	HLA-E	0.2397
GTEx_esophagus_gej	HLA-E	0.218577
GTEx_esophagus_mucosa	HLA-E	0.144521
GTEx_esophagus_muscularis	HLA-E	0.233615
GTEx_heart_atrial_appendage	HLA-E	0.251901
GTEx_heart_left_ventricle	HLA-E	0.134538
GTEx_kidney_cortex	HLA-E	0.123336
GTEx_liver	HLA-E	0.124126
GTEx_lung	HLA-E	0.104517
GTEx_minor_salivary_gland	HLA-E	0.15749
GTEx_muscle	HLA-E	0.150276
GTEx_nerve_tibial	HLA-E	0.293949
GTEx_ovary	HLA-E	0.13203
GTEx_pancreas	HLA-E	0.178054
GTEx_pituitary	HLA-E	0.117942
GTEx_prostate	HLA-E	0.121471
GTEx_skin_not_sun_exposed	HLA-E	0.294843
GTEx_skin_sun_exposed	HLA-E	0.32107
GTEx_small_intestine	HLA-E	0.17943
GTEx_spleen	HLA-E	0.13113
GTEx_stomach	HLA-E	0.153313
GTEx_testis	HLA-E	0.127415
GTEx_thyroid	HLA-E	0.13327
GTEx_uterus	HLA-E	0.136135
GTEx_vagina	HLA-E	0.174422
GTEx_blood	HLA-E	0.195069
HipSci_iPSC	HLA-E	0.119001
iPSCORE_iPSC	HLA-E	0.144026
Lepik_2017_blood	HLA-E	0.477251
Nedelec_2016_macrophage_Listeria	HLA-E	0.133382
Nedelec_2016_macrophage_naive	HLA-E	0.265719
Nedelec_2016_macrophage_Salmonella	HLA-E	0.172627
Peng_2018_placenta_naive	HLA-E	0.191286
PhLiPS_iPSC	HLA-E	0.184748
PhLiPS_HLC	HLA-E	0.145708
Quach_2016_monocyte_naive	HLA-E	0.145186
Quach_2016_monocyte_LPS	HLA-E	0.280632
Quach_2016_monocyte_Pam3CSK4	HLA-E	0.255283
Quach_2016_monocyte_R848	HLA-E	0.210216
Quach_2016_monocyte_IAV	HLA-E	0.133819
ROSMAP_brain_naive	HLA-E	0.136396
Schmiedel_2018_Tfh_memory	HLA-E	0.130066
Schmiedel_2018_Th17_memory	HLA-E	0.124972
Schmiedel_2018_Th1_memory	HLA-E	0.13501
Schmiedel_2018_Th2_memory	HLA-E	0.136185
Schmiedel_2018_Th1-17_memory	HLA-E	0.121315
Schmiedel_2018_Treg_memory	HLA-E	0.129183
Schmiedel_2018_Treg_naive	HLA-E	0.127475
Schmiedel_2018_B-cell_naive	HLA-E	0.120753
Schmiedel_2018_CD4_T-cell_naive	HLA-E	0.125396
Schmiedel_2018_CD4_T-cell_anti-CD3-CD28	HLA-E	0.265789
Schmiedel_2018_CD8_T-cell_naive	HLA-E	0.144692
Schmiedel_2018_CD8_T-cell_anti-CD3-CD28	HLA-E	0.348995
Schmiedel_2018_monocyte_CD16_naive	HLA-E	0.155466
Schmiedel_2018_monocyte_naive	HLA-E	0.122594
Schmiedel_2018_NK-cell_naive	HLA-E	0.124912
Schwartzentruber_2018_sensory_neuron	HLA-E	0.141293
Steinberg_2020_synovium_naive	HLA-E	0.129048
Steinberg_2020_low_grade_cartilage_naive	HLA-E	0.119952
Steinberg_2020_high_grade_cartilage_naive	HLA-E	0.120451
TwinsUK_fat	HLA-E	0.104375
TwinsUK_LCL	HLA-E	0.546616
TwinsUK_skin	HLA-E	0.130888
TwinsUK_blood	HLA-E	0.202562
van_de_Bunt_2015_pancreatic_islet	HLA-E	0.120955
Young_2019_microglia_naive	HLA-E	0.166039
Alasoo_2018_macrophage_naive	GNL1	0.123132
Alasoo_2018_macrophage_IFNg	GNL1	0.130773
Alasoo_2018_macrophage_Salmonella	GNL1	0.136987
Alasoo_2018_macrophage_IFNg+Salmonella	GNL1	0.136064
BLUEPRINT_monocyte	GNL1	0.150916
BLUEPRINT_neutrophil	GNL1	0.118889
BLUEPRINT_T-cell	GNL1	0.11567
Bossini-Castillo_2019_Treg_naive	GNL1	0.122118
Braineac2_putamen	GNL1	0.113709
Braineac2_substantia_nigra	GNL1	0.123913
BrainSeq_brain	GNL1	0.107651
CAP_LCL_naive	GNL1	0.131027
CAP_LCL_statin	GNL1	0.121885
CommonMind_DLPFC_naive	GNL1	0.0939349
FUSION_muscle_naive	GNL1	0.126492
FUSION_adipose_naive	GNL1	0.137948
GENCORD_LCL	GNL1	0.14062
GENCORD_fibroblast	GNL1	0.114673
GENCORD_T-cell	GNL1	0.140019
GEUVADIS_LCL	GNL1	0.21227
GTEx_adipose_subcutaneous	GNL1	0.17624
GTEx_adipose_visceral	GNL1	0.101919
GTEx_adrenal_gland	GNL1	0.135049
GTEx_artery_aorta	GNL1	0.192877
GTEx_artery_coronary	GNL1	0.121716
GTEx_artery_tibial	GNL1	0.12821
GTEx_brain_amygdala	GNL1	0.116436
GTEx_brain_anterior_cingulate_cortex	GNL1	0.142324
GTEx_brain_caudate	GNL1	0.155808
GTEx_brain_cerebellar_hemisphere	GNL1	0.150874
GTEx_brain_cerebellum	GNL1	0.175062
GTEx_brain_cortex	GNL1	0.121355
GTEx_brain_frontal_cortex	GNL1	0.134401
GTEx_brain_hippocampus	GNL1	0.135763
GTEx_brain_hypothalamus	GNL1	0.129521
GTEx_brain_nucleus_accumbens	GNL1	0.15322
GTEx_brain_putamen	GNL1	0.128123
GTEx_brain_spinal_cord	GNL1	0.128436
GTEx_brain_substantia_nigra	GNL1	0.122295
GTEx_breast	GNL1	0.109814
GTEx_fibroblast	GNL1	0.0946572
GTEx_LCL	GNL1	0.136687
GTEx_colon_sigmoid	GNL1	0.211382
GTEx_colon_transverse	GNL1	0.162783
GTEx_esophagus_gej	GNL1	0.146414
GTEx_esophagus_mucosa	GNL1	0.128492
GTEx_esophagus_muscularis	GNL1	0.109268
GTEx_heart_atrial_appendage	GNL1	0.112465
GTEx_heart_left_ventricle	GNL1	0.112214
GTEx_kidney_cortex	GNL1	0.127262
GTEx_liver	GNL1	0.123959
GTEx_lung	GNL1	0.119837
GTEx_minor_salivary_gland	GNL1	0.154892
GTEx_muscle	GNL1	0.109962
GTEx_nerve_tibial	GNL1	0.104289
GTEx_ovary	GNL1	0.120474
GTEx_pancreas	GNL1	0.137933
GTEx_pituitary	GNL1	0.121288
GTEx_prostate	GNL1	0.143687
GTEx_skin_not_sun_exposed	GNL1	0.16924
GTEx_skin_sun_exposed	GNL1	0.0994457
GTEx_small_intestine	GNL1	0.15687
GTEx_spleen	GNL1	0.146226
GTEx_stomach	GNL1	0.108594
GTEx_testis	GNL1	0.201138
GTEx_thyroid	GNL1	0.114942
GTEx_uterus	GNL1	0.137249
GTEx_vagina	GNL1	0.126381
GTEx_blood	GNL1	0.129164
HipSci_iPSC	GNL1	0.110175
iPSCORE_iPSC	GNL1	0.127245
Lepik_2017_blood	GNL1	0.191425
Nedelec_2016_macrophage_Listeria	GNL1	0.130558
Nedelec_2016_macrophage_naive	GNL1	0.134532
Nedelec_2016_macrophage_Salmonella	GNL1	0.163216
Peng_2018_placenta_naive	GNL1	0.132573
PhLiPS_iPSC	GNL1	0.148891
PhLiPS_HLC	GNL1	0.123848
Quach_2016_monocyte_naive	GNL1	0.131606
Quach_2016_monocyte_LPS	GNL1	0.153842
Quach_2016_monocyte_Pam3CSK4	GNL1	0.32451
Quach_2016_monocyte_R848	GNL1	0.19551
Quach_2016_monocyte_IAV	GNL1	0.112278
ROSMAP_brain_naive	GNL1	0.127043
Schmiedel_2018_Tfh_memory	GNL1	0.13851
Schmiedel_2018_Th17_memory	GNL1	0.137548
Schmiedel_2018_Th1_memory	GNL1	0.122012
Schmiedel_2018_Th2_memory	GNL1	0.132831
Schmiedel_2018_Th1-17_memory	GNL1	0.126829
Schmiedel_2018_Treg_memory	GNL1	0.123451
Schmiedel_2018_Treg_naive	GNL1	0.123147
Schmiedel_2018_B-cell_naive	GNL1	0.119936
Schmiedel_2018_CD4_T-cell_naive	GNL1	0.125771
Schmiedel_2018_CD4_T-cell_anti-CD3-CD28	GNL1	0.12953
Schmiedel_2018_CD8_T-cell_naive	GNL1	0.122991
Schmiedel_2018_CD8_T-cell_anti-CD3-CD28	GNL1	0.136305
Schmiedel_2018_monocyte_CD16_naive	GNL1	0.124903
Schmiedel_2018_monocyte_naive	GNL1	0.119772
Schmiedel_2018_NK-cell_naive	GNL1	0.135996
Schwartzentruber_2018_sensory_neuron	GNL1	0.128361
Steinberg_2020_synovium_naive	GNL1	0.129261
Steinberg_2020_low_grade_cartilage_naive	GNL1	0.148223
Steinberg_2020_high_grade_cartilage_naive	GNL1	0.131708
TwinsUK_fat	GNL1	0.113641
TwinsUK_LCL	GNL1	0.150809
TwinsUK_skin	GNL1	0.116455
TwinsUK_blood	GNL1	0.129166
van_de_Bunt_2015_pancreatic_islet	GNL1	0.119644
Young_2019_microglia_naive	GNL1	0.161473
Alasoo_2018_macrophage_naive	PRR3	0.114559
Alasoo_2018_macrophage_IFNg	PRR3	0.129148
Alasoo_2018_macrophage_Salmonella	PRR3	0.121709
Alasoo_2018_macrophage_IFNg+Salmonella	PRR3	0.117632
BLUEPRINT_monocyte	PRR3	0.142177
BLUEPRINT_neutrophil	PRR3	0.132407
BLUEPRINT_T-cell	PRR3	0.113777
Bossini-Castillo_2019_Treg_naive	PRR3	0.128157
Braineac2_putamen	PRR3	0.124789
Braineac2_substantia_nigra	PRR3	0.133123
BrainSeq_brain	PRR3	0.116615
CAP_LCL_naive	PRR3	0.123371
CAP_LCL_statin	PRR3	0.123131
CommonMind_DLPFC_naive	PRR3	0.158603
FUSION_muscle_naive	PRR3	0.137282
FUSION_adipose_naive	PRR3	0.132054
GENCORD_LCL	PRR3	0.12884
GENCORD_fibroblast	PRR3	0.122462
GENCORD_T-cell	PRR3	0.120215
GEUVADIS_LCL	PRR3	0.130438
GTEx_adipose_subcutaneous	PRR3	0.43271
GTEx_adipose_visceral	PRR3	0.10304
GTEx_adrenal_gland	PRR3	0.112676
GTEx_artery_aorta	PRR3	0.219214
GTEx_artery_coronary	PRR3	0.122691
GTEx_artery_tibial	PRR3	0.127445
GTEx_brain_amygdala	PRR3	0.134994
GTEx_brain_anterior_cingulate_cortex	PRR3	0.159529
GTEx_brain_caudate	PRR3	0.116142
GTEx_brain_cerebellar_hemisphere	PRR3	0.117165
GTEx_brain_cerebellum	PRR3	0.127919
GTEx_brain_cortex	PRR3	0.124285
GTEx_brain_frontal_cortex	PRR3	0.115262
GTEx_brain_hippocampus	PRR3	0.125118
GTEx_brain_hypothalamus	PRR3	0.124948
GTEx_brain_nucleus_accumbens	PRR3	0.130671
GTEx_brain_putamen	PRR3	0.115258
GTEx_brain_spinal_cord	PRR3	0.124059
GTEx_brain_substantia_nigra	PRR3	0.135545
GTEx_breast	PRR3	0.104067
GTEx_fibroblast	PRR3	0.496273
GTEx_LCL	PRR3	0.123605
GTEx_colon_sigmoid	PRR3	0.110828
GTEx_colon_transverse	PRR3	0.104862
GTEx_esophagus_gej	PRR3	0.142997
GTEx_esophagus_mucosa	PRR3	0.132186
GTEx_esophagus_muscularis	PRR3	0.111788
GTEx_heart_atrial_appendage	PRR3	0.11869
GTEx_heart_left_ventricle	PRR3	0.103477
GTEx_kidney_cortex	PRR3	0.131955
GTEx_liver	PRR3	0.123652
GTEx_lung	PRR3	0.175949
GTEx_minor_salivary_gland	PRR3	0.121289
GTEx_muscle	PRR3	0.0993319
GTEx_nerve_tibial	PRR3	0.106435
GTEx_ovary	PRR3	0.125682
GTEx_pancreas	PRR3	0.132615
GTEx_pituitary	PRR3	0.121217
GTEx_prostate	PRR3	0.121527
GTEx_skin_not_sun_exposed	PRR3	0.135602
GTEx_skin_sun_exposed	PRR3	0.138634
GTEx_small_intestine	PRR3	0.127429
GTEx_spleen	PRR3	0.138692
GTEx_stomach	PRR3	0.104773
GTEx_testis	PRR3	0.125056
GTEx_thyroid	PRR3	0.134238
GTEx_uterus	PRR3	0.121338
GTEx_vagina	PRR3	0.128661
GTEx_blood	PRR3	0.152969
HipSci_iPSC	PRR3	0.110705
iPSCORE_iPSC	PRR3	0.127136
Lepik_2017_blood	PRR3	0.184585
Nedelec_2016_macrophage_Listeria	PRR3	0.172662
Nedelec_2016_macrophage_naive	PRR3	0.114711
Nedelec_2016_macrophage_Salmonella	PRR3	0.200503
Peng_2018_placenta_naive	PRR3	0.145256
PhLiPS_iPSC	PRR3	0.131086
PhLiPS_HLC	PRR3	0.129302
Quach_2016_monocyte_naive	PRR3	0.15665
Quach_2016_monocyte_LPS	PRR3	0.135443
Quach_2016_monocyte_Pam3CSK4	PRR3	0.14577
Quach_2016_monocyte_R848	PRR3	0.128851
Quach_2016_monocyte_IAV	PRR3	0.131828
ROSMAP_brain_naive	PRR3	0.131365
Schmiedel_2018_Tfh_memory	PRR3	0.133298
Schmiedel_2018_Th17_memory	PRR3	0.141732
Schmiedel_2018_Th1_memory	PRR3	0.129507
Schmiedel_2018_Th2_memory	PRR3	0.146501
Schmiedel_2018_Th1-17_memory	PRR3	0.135831
Schmiedel_2018_Treg_memory	PRR3	0.14587
Schmiedel_2018_Treg_naive	PRR3	0.129112
Schmiedel_2018_B-cell_naive	PRR3	0.231054
Schmiedel_2018_CD4_T-cell_naive	PRR3	0.130249
Schmiedel_2018_CD4_T-cell_anti-CD3-CD28	PRR3	0.132733
Schmiedel_2018_CD8_T-cell_naive	PRR3	0.131882
Schmiedel_2018_CD8_T-cell_anti-CD3-CD28	PRR3	0.132226
Schmiedel_2018_monocyte_CD16_naive	PRR3	0.126282
Schmiedel_2018_monocyte_naive	PRR3	0.132339
Schmiedel_2018_NK-cell_naive	PRR3	0.145849
Schwartzentruber_2018_sensory_neuron	PRR3	0.121652
Steinberg_2020_synovium_naive	PRR3	0.120887
Steinberg_2020_low_grade_cartilage_naive	PRR3	0.127955
Steinberg_2020_high_grade_cartilage_naive	PRR3	0.15114
TwinsUK_fat	PRR3	0.120875
TwinsUK_LCL	PRR3	0.135944
TwinsUK_skin	PRR3	0.121699
TwinsUK_blood	PRR3	0.11612
van_de_Bunt_2015_pancreatic_islet	PRR3	0.121836
Young_2019_microglia_naive	PRR3	0.128879
Alasoo_2018_macrophage_naive	ABCF1	0.136504
Alasoo_2018_macrophage_IFNg	ABCF1	0.124947
Alasoo_2018_macrophage_Salmonella	ABCF1	0.119778
Alasoo_2018_macrophage_IFNg+Salmonella	ABCF1	0.119326
BLUEPRINT_monocyte	ABCF1	0.125792
BLUEPRINT_neutrophil	ABCF1	0.377417
BLUEPRINT_T-cell	ABCF1	0.34053
Bossini-Castillo_2019_Treg_naive	ABCF1	0.173633
Braineac2_putamen	ABCF1	0.115383
Braineac2_substantia_nigra	ABCF1	0.121387
BrainSeq_brain	ABCF1	0.12392
CAP_LCL_naive	ABCF1	0.164402
CAP_LCL_statin	ABCF1	0.20931
CommonMind_DLPFC_naive	ABCF1	0.116261
FUSION_muscle_naive	ABCF1	0.344488
FUSION_adipose_naive	ABCF1	0.33229
GENCORD_LCL	ABCF1	0.145098
GENCORD_fibroblast	ABCF1	0.127256
GENCORD_T-cell	ABCF1	0.149918
GEUVADIS_LCL	ABCF1	0.349091
GTEx_adipose_subcutaneous	ABCF1	0.108585
GTEx_adipose_visceral	ABCF1	0.155085
GTEx_adrenal_gland	ABCF1	0.252814
GTEx_artery_aorta	ABCF1	0.232773
GTEx_artery_coronary	ABCF1	0.149663
GTEx_artery_tibial	ABCF1	0.197863
GTEx_brain_amygdala	ABCF1	0.126986
GTEx_brain_anterior_cingulate_cortex	ABCF1	0.121404
GTEx_brain_caudate	ABCF1	0.121021
GTEx_brain_cerebellar_hemisphere	ABCF1	0.124088
GTEx_brain_cerebellum	ABCF1	0.123898
GTEx_brain_cortex	ABCF1	0.12515
GTEx_brain_frontal_cortex	ABCF1	0.14391
GTEx_brain_hippocampus	ABCF1	0.126559
GTEx_brain_hypothalamus	ABCF1	0.11771
GTEx_brain_nucleus_accumbens	ABCF1	0.115109
GTEx_brain_putamen	ABCF1	0.120722
GTEx_brain_spinal_cord	ABCF1	0.126452
GTEx_brain_substantia_nigra	ABCF1	0.151956
GTEx_breast	ABCF1	0.189339
GTEx_fibroblast	ABCF1	0.243683
GTEx_LCL	ABCF1	0.2924
GTEx_colon_sigmoid	ABCF1	0.13617
GTEx_colon_transverse	ABCF1	0.130437
GTEx_esophagus_gej	ABCF1	0.306481
GTEx_esophagus_mucosa	ABCF1	0.121435
GTEx_esophagus_muscularis	ABCF1	0.419141
GTEx_heart_atrial_appendage	ABCF1	0.118903
GTEx_heart_left_ventricle	ABCF1	0.247922
GTEx_kidney_cortex	ABCF1	0.1314
GTEx_liver	ABCF1	0.121195
GTEx_lung	ABCF1	0.150546
GTEx_minor_salivary_gland	ABCF1	0.135493
GTEx_muscle	ABCF1	0.288185
GTEx_nerve_tibial	ABCF1	0.336854
GTEx_ovary	ABCF1	0.16474
GTEx_pancreas	ABCF1	0.149738
GTEx_pituitary	ABCF1	0.112164
GTEx_prostate	ABCF1	0.130423
GTEx_skin_not_sun_exposed	ABCF1	0.347631
GTEx_skin_sun_exposed	ABCF1	0.338786
GTEx_small_intestine	ABCF1	0.126704
GTEx_spleen	ABCF1	0.147142
GTEx_stomach	ABCF1	0.179913
GTEx_testis	ABCF1	0.296059
GTEx_thyroid	ABCF1	0.409414
GTEx_uterus	ABCF1	0.207945
GTEx_vagina	ABCF1	0.135365
GTEx_blood	ABCF1	0.104273
HipSci_iPSC	ABCF1	0.147266
iPSCORE_iPSC	ABCF1	0.13211
Lepik_2017_blood	ABCF1	0.391728
Nedelec_2016_macrophage_Listeria	ABCF1	0.161105
Nedelec_2016_macrophage_naive	ABCF1	0.13036
Nedelec_2016_macrophage_Salmonella	ABCF1	0.173714
Peng_2018_placenta_naive	ABCF1	0.170908
PhLiPS_iPSC	ABCF1	0.127343
PhLiPS_HLC	ABCF1	0.129507
Quach_2016_monocyte_naive	ABCF1	0.435339
Quach_2016_monocyte_LPS	ABCF1	0.441875
Quach_2016_monocyte_Pam3CSK4	ABCF1	0.442088
Quach_2016_monocyte_R848	ABCF1	0.440883
Quach_2016_monocyte_IAV	ABCF1	0.443947
ROSMAP_brain_naive	ABCF1	0.171018
Schmiedel_2018_Tfh_memory	ABCF1	0.125706
Schmiedel_2018_Th17_memory	ABCF1	0.131168
Schmiedel_2018_Th1_memory	ABCF1	0.123635
Schmiedel_2018_Th2_memory	ABCF1	0.128205
Schmiedel_2018_Th1-17_memory	ABCF1	0.126692
Schmiedel_2018_Treg_memory	ABCF1	0.13279
Schmiedel_2018_Treg_naive	ABCF1	0.13199
Schmiedel_2018_B-cell_naive	ABCF1	0.132161
Schmiedel_2018_CD4_T-cell_naive	ABCF1	0.12594
Schmiedel_2018_CD4_T-cell_anti-CD3-CD28	ABCF1	0.327959
Schmiedel_2018_CD8_T-cell_naive	ABCF1	0.148573
Schmiedel_2018_CD8_T-cell_anti-CD3-CD28	ABCF1	0.298198
Schmiedel_2018_monocyte_CD16_naive	ABCF1	0.132003
Schmiedel_2018_monocyte_naive	ABCF1	0.122303
Schmiedel_2018_NK-cell_naive	ABCF1	0.122997
Schwartzentruber_2018_sensory_neuron	ABCF1	0.152136
Steinberg_2020_synovium_naive	ABCF1	0.136841
Steinberg_2020_low_grade_cartilage_naive	ABCF1	0.123663
Steinberg_2020_high_grade_cartilage_naive	ABCF1	0.118246
TwinsUK_fat	ABCF1	0.379868
TwinsUK_LCL	ABCF1	0.276693
TwinsUK_skin	ABCF1	0.346313
TwinsUK_blood	ABCF1	0.165706
van_de_Bunt_2015_pancreatic_islet	ABCF1	0.143932
Young_2019_microglia_naive	ABCF1	0.11502
Alasoo_2018_macrophage_naive	PPP1R10	0.128409
Alasoo_2018_macrophage_IFNg	PPP1R10	0.128125
Alasoo_2018_macrophage_Salmonella	PPP1R10	0.121901
Alasoo_2018_macrophage_IFNg+Salmonella	PPP1R10	0.132992
BLUEPRINT_monocyte	PPP1R10	0.130227
BLUEPRINT_neutrophil	PPP1R10	0.120805
BLUEPRINT_T-cell	PPP1R10	0.123036
Bossini-Castillo_2019_Treg_naive	PPP1R10	0.118534
Braineac2_putamen	PPP1R10	0.119771
Braineac2_substantia_nigra	PPP1R10	0.14039
BrainSeq_brain	PPP1R10	0.0991859
CAP_LCL_naive	PPP1R10	0.122844
CAP_LCL_statin	PPP1R10	0.126231
CommonMind_DLPFC_naive	PPP1R10	0.108915
FUSION_muscle_naive	PPP1R10	0.116989
FUSION_adipose_naive	PPP1R10	0.13629
GENCORD_LCL	PPP1R10	0.166059
GENCORD_fibroblast	PPP1R10	0.136232
GENCORD_T-cell	PPP1R10	0.136047
GEUVADIS_LCL	PPP1R10	0.110673
GTEx_adipose_subcutaneous	PPP1R10	0.0971296
GTEx_adipose_visceral	PPP1R10	0.101524
GTEx_adrenal_gland	PPP1R10	0.116864
GTEx_artery_aorta	PPP1R10	0.407109
GTEx_artery_coronary	PPP1R10	0.179912
GTEx_artery_tibial	PPP1R10	0.124847
GTEx_brain_amygdala	PPP1R10	0.125295
GTEx_brain_anterior_cingulate_cortex	PPP1R10	0.123069
GTEx_brain_caudate	PPP1R10	0.132961
GTEx_brain_cerebellar_hemisphere	PPP1R10	0.121595
GTEx_brain_cerebellum	PPP1R10	0.12224
GTEx_brain_cortex	PPP1R10	0.130947
GTEx_brain_frontal_cortex	PPP1R10	0.128496
GTEx_brain_hippocampus	PPP1R10	0.124079
GTEx_brain_hypothalamus	PPP1R10	0.153495
GTEx_brain_nucleus_accumbens	PPP1R10	0.111341
GTEx_brain_putamen	PPP1R10	0.133742
GTEx_brain_spinal_cord	PPP1R10	0.125782
GTEx_brain_substantia_nigra	PPP1R10	0.127602
GTEx_breast	PPP1R10	0.112605
GTEx_fibroblast	PPP1R10	0.200505
GTEx_LCL	PPP1R10	0.143191
GTEx_colon_sigmoid	PPP1R10	0.175637
GTEx_colon_transverse	PPP1R10	0.118251
GTEx_esophagus_gej	PPP1R10	0.112244
GTEx_esophagus_mucosa	PPP1R10	0.222992
GTEx_esophagus_muscularis	PPP1R10	0.134759
GTEx_heart_atrial_appendage	PPP1R10	0.11156
GTEx_heart_left_ventricle	PPP1R10	0.193853
GTEx_kidney_cortex	PPP1R10	0.132429
GTEx_liver	PPP1R10	0.123837
GTEx_lung	PPP1R10	0.105552
GTEx_minor_salivary_gland	PPP1R10	0.124784
GTEx_muscle	PPP1R10	0.0985366
GTEx_nerve_tibial	PPP1R10	0.105837
GTEx_ovary	PPP1R10	0.114382
GTEx_pancreas	PPP1R10	0.158683
GTEx_pituitary	PPP1R10	0.128354
GTEx_prostate	PPP1R10	0.117702
GTEx_skin_not_sun_exposed	PPP1R10	0.110865
GTEx_skin_sun_exposed	PPP1R10	0.121184
GTEx_small_intestine	PPP1R10	0.158194
GTEx_spleen	PPP1R10	0.128698
GTEx_stomach	PPP1R10	0.113621
GTEx_testis	PPP1R10	0.140086
GTEx_thyroid	PPP1R10	0.108523
GTEx_uterus	PPP1R10	0.121142
GTEx_vagina	PPP1R10	0.12626
GTEx_blood	PPP1R10	0.092881
HipSci_iPSC	PPP1R10	0.137294
iPSCORE_iPSC	PPP1R10	0.122453
Lepik_2017_blood	PPP1R10	0.130961
Nedelec_2016_macrophage_Listeria	PPP1R10	0.162114
Nedelec_2016_macrophage_naive	PPP1R10	0.133646
Nedelec_2016_macrophage_Salmonella	PPP1R10	0.123253
Peng_2018_placenta_naive	PPP1R10	0.127591
PhLiPS_iPSC	PPP1R10	0.124417
PhLiPS_HLC	PPP1R10	0.126925
Quach_2016_monocyte_naive	PPP1R10	0.125848
Quach_2016_monocyte_LPS	PPP1R10	0.124501
Quach_2016_monocyte_Pam3CSK4	PPP1R10	0.128817
Quach_2016_monocyte_R848	PPP1R10	0.118197
Quach_2016_monocyte_IAV	PPP1R10	0.181097
ROSMAP_brain_naive	PPP1R10	0.112729
Schmiedel_2018_Tfh_memory	PPP1R10	0.121947
Schmiedel_2018_Th17_memory	PPP1R10	0.129795
Schmiedel_2018_Th1_memory	PPP1R10	0.137608
Schmiedel_2018_Th2_memory	PPP1R10	0.127242
Schmiedel_2018_Th1-17_memory	PPP1R10	0.138656
Schmiedel_2018_Treg_memory	PPP1R10	0.134342
Schmiedel_2018_Treg_naive	PPP1R10	0.138801
Schmiedel_2018_B-cell_naive	PPP1R10	0.126717
Schmiedel_2018_CD4_T-cell_naive	PPP1R10	0.126316
Schmiedel_2018_CD4_T-cell_anti-CD3-CD28	PPP1R10	0.125848
Schmiedel_2018_CD8_T-cell_naive	PPP1R10	0.124359
Schmiedel_2018_CD8_T-cell_anti-CD3-CD28	PPP1R10	0.137158
Schmiedel_2018_monocyte_CD16_naive	PPP1R10	0.137222
Schmiedel_2018_monocyte_naive	PPP1R10	0.125145
Schmiedel_2018_NK-cell_naive	PPP1R10	0.161306
Schwartzentruber_2018_sensory_neuron	PPP1R10	0.125672
Steinberg_2020_synovium_naive	PPP1R10	0.139525
Steinberg_2020_low_grade_cartilage_naive	PPP1R10	0.124272
Steinberg_2020_high_grade_cartilage_naive	PPP1R10	0.128783
TwinsUK_fat	PPP1R10	0.115069
TwinsUK_LCL	PPP1R10	0.109196
TwinsUK_skin	PPP1R10	0.136164
TwinsUK_blood	PPP1R10	0.216276
van_de_Bunt_2015_pancreatic_islet	PPP1R10	0.117585
Young_2019_microglia_naive	PPP1R10	0.125357
Alasoo_2018_macrophage_naive	MRPS18B	0.122719
Alasoo_2018_macrophage_IFNg	MRPS18B	0.122456
Alasoo_2018_macrophage_Salmonella	MRPS18B	0.128324
Alasoo_2018_macrophage_IFNg+Salmonella	MRPS18B	0.129848
BLUEPRINT_monocyte	MRPS18B	0.136078
BLUEPRINT_neutrophil	MRPS18B	0.15293
BLUEPRINT_T-cell	MRPS18B	0.146067
Bossini-Castillo_2019_Treg_naive	MRPS18B	0.127229
Braineac2_putamen	MRPS18B	0.128933
Braineac2_substantia_nigra	MRPS18B	0.13223
BrainSeq_brain	MRPS18B	0.151891
CAP_LCL_naive	MRPS18B	0.125624
CAP_LCL_statin	MRPS18B	0.131147
CommonMind_DLPFC_naive	MRPS18B	0.156988
FUSION_muscle_naive	MRPS18B	0.106651
FUSION_adipose_naive	MRPS18B	0.126671
GENCORD_LCL	MRPS18B	0.131266
GENCORD_fibroblast	MRPS18B	0.127012
GENCORD_T-cell	MRPS18B	0.119208
GEUVADIS_LCL	MRPS18B	0.138092
GTEx_adipose_subcutaneous	MRPS18B	0.136817
GTEx_adipose_visceral	MRPS18B	0.10728
GTEx_adrenal_gland	MRPS18B	0.116378
GTEx_artery_aorta	MRPS18B	0.102589
GTEx_artery_coronary	MRPS18B	0.116141
GTEx_artery_tibial	MRPS18B	0.125301
GTEx_brain_amygdala	MRPS18B	0.130009
GTEx_brain_anterior_cingulate_cortex	MRPS18B	0.128666
GTEx_brain_caudate	MRPS18B	0.135881
GTEx_brain_cerebellar_hemisphere	MRPS18B	0.163802
GTEx_brain_cerebellum	MRPS18B	0.147519
GTEx_brain_cortex	MRPS18B	0.120382
GTEx_brain_frontal_cortex	MRPS18B	0.119116
GTEx_brain_hippocampus	MRPS18B	0.118709
GTEx_brain_hypothalamus	MRPS18B	0.13585
GTEx_brain_nucleus_accumbens	MRPS18B	0.114151
GTEx_brain_putamen	MRPS18B	0.125545
GTEx_brain_spinal_cord	MRPS18B	0.124555
GTEx_brain_substantia_nigra	MRPS18B	0.128198
GTEx_breast	MRPS18B	0.157133
GTEx_fibroblast	MRPS18B	0.112103
GTEx_LCL	MRPS18B	0.133667
GTEx_colon_sigmoid	MRPS18B	0.107429
GTEx_colon_transverse	MRPS18B	0.154881
GTEx_esophagus_gej	MRPS18B	0.107663
GTEx_esophagus_mucosa	MRPS18B	0.106864
GTEx_esophagus_muscularis	MRPS18B	0.100902
GTEx_heart_atrial_appendage	MRPS18B	0.124752
GTEx_heart_left_ventricle	MRPS18B	0.126053
GTEx_kidney_cortex	MRPS18B	0.125705
GTEx_liver	MRPS18B	0.125227
GTEx_lung	MRPS18B	0.125871
GTEx_minor_salivary_gland	MRPS18B	0.118197
GTEx_muscle	MRPS18B	0.122537
GTEx_nerve_tibial	MRPS18B	0.123024
GTEx_ovary	MRPS18B	0.120681
GTEx_pancreas	MRPS18B	0.120799
GTEx_pituitary	MRPS18B	0.122402
GTEx_prostate	MRPS18B	0.142464
GTEx_skin_not_sun_exposed	MRPS18B	0.224579
GTEx_skin_sun_exposed	MRPS18B	0.170703
GTEx_small_intestine	MRPS18B	0.133077
GTEx_spleen	MRPS18B	0.135875
GTEx_stomach	MRPS18B	0.108945
GTEx_testis	MRPS18B	0.149458
GTEx_thyroid	MRPS18B	0.0947094
GTEx_uterus	MRPS18B	0.118531
GTEx_vagina	MRPS18B	0.137618
GTEx_blood	MRPS18B	0.0969482
HipSci_iPSC	MRPS18B	0.124933
iPSCORE_iPSC	MRPS18B	0.128059
Lepik_2017_blood	MRPS18B	0.124636
Nedelec_2016_macrophage_Listeria	MRPS18B	0.168509
Nedelec_2016_macrophage_naive	MRPS18B	0.147501
Nedelec_2016_macrophage_Salmonella	MRPS18B	0.123885
Peng_2018_placenta_naive	MRPS18B	0.141083
PhLiPS_iPSC	MRPS18B	0.138831
PhLiPS_HLC	MRPS18B	0.126849
Quach_2016_monocyte_naive	MRPS18B	0.119103
Quach_2016_monocyte_LPS	MRPS18B	0.122342
Quach_2016_monocyte_Pam3CSK4	MRPS18B	0.128744
Quach_2016_monocyte_R848	MRPS18B	0.151582
Quach_2016_monocyte_IAV	MRPS18B	0.119943
ROSMAP_brain_naive	MRPS18B	0.205316
Schmiedel_2018_Tfh_memory	MRPS18B	0.129567
Schmiedel_2018_Th17_memory	MRPS18B	0.154206
Schmiedel_2018_Th1_memory	MRPS18B	0.123074
Schmiedel_2018_Th2_memory	MRPS18B	0.137099
Schmiedel_2018_Th1-17_memory	MRPS18B	0.135851
Schmiedel_2018_Treg_memory	MRPS18B	0.135045
Schmiedel_2018_Treg_naive	MRPS18B	0.136732
Schmiedel_2018_B-cell_naive	MRPS18B	0.151923
Schmiedel_2018_CD4_T-cell_naive	MRPS18B	0.151152
Schmiedel_2018_CD4_T-cell_anti-CD3-CD28	MRPS18B	0.121795
Schmiedel_2018_CD8_T-cell_naive	MRPS18B	0.132714
Schmiedel_2018_CD8_T-cell_anti-CD3-CD28	MRPS18B	0.121784
Schmiedel_2018_monocyte_CD16_naive	MRPS18B	0.13718
Schmiedel_2018_monocyte_naive	MRPS18B	0.12373
Schmiedel_2018_NK-cell_naive	MRPS18B	0.13376
Schwartzentruber_2018_sensory_neuron	MRPS18B	0.159944
Steinberg_2020_synovium_naive	MRPS18B	0.126669
Steinberg_2020_low_grade_cartilage_naive	MRPS18B	0.127142
Steinberg_2020_high_grade_cartilage_naive	MRPS18B	0.127304
TwinsUK_fat	MRPS18B	0.112306
TwinsUK_LCL	MRPS18B	0.174774
TwinsUK_skin	MRPS18B	0.103381
TwinsUK_blood	MRPS18B	0.135427
van_de_Bunt_2015_pancreatic_islet	MRPS18B	0.120422
Young_2019_microglia_naive	MRPS18B	0.140136
Alasoo_2018_macrophage_naive	ATAT1	0.121871
Alasoo_2018_macrophage_IFNg	ATAT1	0.128865
Alasoo_2018_macrophage_Salmonella	ATAT1	0.134636
Alasoo_2018_macrophage_IFNg+Salmonella	ATAT1	0.139326
BLUEPRINT_monocyte	ATAT1	0.127326
BLUEPRINT_neutrophil	ATAT1	0.117728
BLUEPRINT_T-cell	ATAT1	0.134216
Bossini-Castillo_2019_Treg_naive	ATAT1	0.126095
Braineac2_putamen	ATAT1	0.123017
Braineac2_substantia_nigra	ATAT1	0.126765
BrainSeq_brain	ATAT1	0.143888
CAP_LCL_naive	ATAT1	0.124219
CAP_LCL_statin	ATAT1	0.126369
CommonMind_DLPFC_naive	ATAT1	0.129411
FUSION_muscle_naive	ATAT1	0.112047
FUSION_adipose_naive	ATAT1	0.117768
GENCORD_LCL	ATAT1	0.149267
GENCORD_fibroblast	ATAT1	0.123788
GENCORD_T-cell	ATAT1	0.190487
GEUVADIS_LCL	ATAT1	0.131072
GTEx_adipose_subcutaneous	ATAT1	0.112929
GTEx_adipose_visceral	ATAT1	0.149198
GTEx_adrenal_gland	ATAT1	0.206845
GTEx_artery_aorta	ATAT1	0.11697
GTEx_artery_coronary	ATAT1	0.109473
GTEx_artery_tibial	ATAT1	0.111298
GTEx_brain_amygdala	ATAT1	0.512203
GTEx_brain_anterior_cingulate_cortex	ATAT1	0.231821
GTEx_brain_caudate	ATAT1	0.298647
GTEx_brain_cerebellar_hemisphere	ATAT1	0.133379
GTEx_brain_cerebellum	ATAT1	0.123481
GTEx_brain_cortex	ATAT1	0.146968
GTEx_brain_frontal_cortex	ATAT1	0.161334
GTEx_brain_hippocampus	ATAT1	0.164745
GTEx_brain_hypothalamus	ATAT1	0.153368
GTEx_brain_nucleus_accumbens	ATAT1	0.151155
[truncated: 3,234 more rows]

## Sheet: ST6_20_infection_genes
Supplementary Data 6. Top 20 Mtb infection induced genes taken from Babunovic et al. 2022 (PMID:35038923).
Gene name
CCL15
CXCL10
CXCL11
IDO1
ETV7
CCL8
PDGFRL
RSAD2
IFI44L
PTGIR
CD38
IFITM1
CCL4
ISG20
SGPP2
TNFAIP6
APOBEC3A
CCL4L2
MX1
TNIP3

## Sheet: ST7_DEGs
Supplementary Data 7. A list of differentially expressed genes that are either Mtb strain specific (g2g-L2 vs non-g2g-L2) or host genotype specific (rs3130660-TT vs rs3130660-AT). The P-values are FDR-adjusted. We reported all genes that have an absolute log2 fold-change in expression greater or equal than 0.7 and FDR-adjusted p-value of 0.01.
gene_symbol	ENSEMBL_ID	adjP	log2FoldChange	Type
HLA-DQB1	ENSG00000179344	6.09e-08	3.11568	TT-specific
ENSG00000280071	ENSG00000280071	0.00254076	2.9537	TT-specific
SLC2A5	ENSG00000142583	2.67e-06	2.76631	TT-specific
UTS2	ENSG00000049247	0.005248	2.64381	TT-specific
FOLR3	ENSG00000110203	0.00945174	2.49186	TT-specific
PRUNE2	ENSG00000106772	1.15e-14	2.32092	TT-specific
ZP3	ENSG00000188372	7.05e-06	2.17533	TT-specific
SHF	ENSG00000138606	2.63e-06	2.03644	TT-specific
TRGV5P	ENSG00000228668	0.00117119	1.98941	TT-specific
TRGV5	ENSG00000211697	0.00084683	1.96447	TT-specific
AMZ1	ENSG00000174945	2.09e-05	1.90576	TT-specific
NLRP2	ENSG00000022556	3.21e-05	1.87714	TT-specific
ORM1	ENSG00000229314	0.00752768	1.87608	TT-specific
ENSG00000250726	ENSG00000250726	1.77e-05	1.85518	TT-specific
HERC2P3	ENSG00000180229	6.52e-07	1.83001	TT-specific
LINC00926	ENSG00000247982	0.00947121	1.7797	TT-specific
TPTEP1	ENSG00000290418	5.12e-13	1.7755	TT-specific
ENSG00000283633	ENSG00000283633	3.23e-07	1.76152	TT-specific
TPTEP1	ENSG00000100181	0.00322576	1.68716	TT-specific
KRT79	ENSG00000185640	3.54e-05	1.66712	TT-specific
FCAR	ENSG00000186431	0.00263529	1.6665	TT-specific
NBPF3	ENSG00000142794	1.77e-07	1.65889	TT-specific
GLB1L	ENSG00000163521	2.41e-05	1.65496	TT-specific
RAB38	ENSG00000123892	7.1e-09	1.58947	TT-specific
ZBTB7C	ENSG00000184828	3.28e-06	1.55822	TT-specific
ENSG00000290897	ENSG00000290897	0.00379043	1.54575	TT-specific
RBP1	ENSG00000114115	0.00511647	1.51321	TT-specific
AKR1C3	ENSG00000196139	0.00279922	1.50489	TT-specific
PGBD5	ENSG00000177614	3.08e-08	1.49273	TT-specific
ENSG00000204971	ENSG00000204971	0.0002784	1.4733	TT-specific
IMPA2	ENSG00000141401	0.00034446	1.46817	TT-specific
MMP17	ENSG00000198598	5.03e-10	1.46083	TT-specific
HLA-DQB2	ENSG00000232629	3.54e-06	1.45242	TT-specific
CYTL1	ENSG00000170891	1.13e-08	1.42734	TT-specific
TMEM163	ENSG00000152128	1.82e-05	1.39553	TT-specific
GOLM1	ENSG00000135052	0.00040492	1.39071	TT-specific
MXRA7	ENSG00000182534	0.00067817	1.37284	TT-specific
PDE6G	ENSG00000185527	1.17e-06	1.36472	TT-specific
ENSG00000285283	ENSG00000285283	0.00437156	1.36408	TT-specific
SPON2	ENSG00000159674	0.00095751	1.36348	TT-specific
SIRPAP1	ENSG00000225774	0.00065915	1.32558	TT-specific
HCAR3	ENSG00000255398	5.44e-06	1.31004	TT-specific
LILRA4	ENSG00000239961	0.00035126	1.30266	TT-specific
SPARC	ENSG00000113140	0.0009635	1.30033	TT-specific
TRAPPC2L	ENSG00000167515	0.00135721	1.28298	TT-specific
MXI1	ENSG00000119950	7.37e-09	1.28082	TT-specific
TUBB4A	ENSG00000104833	7.83e-05	1.28041	TT-specific
PLA2G4C	ENSG00000105499	4.66e-08	1.26916	TT-specific
APOC2	ENSG00000234906	0.00122994	1.26857	TT-specific
ENSG00000242282	ENSG00000242282	0.00463272	1.26375	TT-specific
DNAJC5B	ENSG00000147570	0.00020427	1.2511	TT-specific
UCHL1	ENSG00000154277	1.68e-11	1.24003	TT-specific
BMP6	ENSG00000153162	2.35e-10	1.22881	TT-specific
DPEP2	ENSG00000167261	5.76e-06	1.22428	TT-specific
ENSG00000257764	ENSG00000257764	0.00024043	1.22243	TT-specific
ENSG00000289439	ENSG00000289439	0.00144721	1.21459	TT-specific
ANGPTL6	ENSG00000130812	1.83e-05	1.21168	TT-specific
PHPT1	ENSG00000054148	5.49e-09	1.20167	TT-specific
DIXDC1	ENSG00000150764	1.06e-05	1.20028	TT-specific
HCAR2	ENSG00000182782	2.57e-06	1.19787	TT-specific
LINC01705	ENSG00000232679	0.00125504	1.19685	TT-specific
FUT10	ENSG00000172728	2.29e-07	1.19325	TT-specific
TMEM119	ENSG00000183160	0.00154723	1.19287	TT-specific
CST7	ENSG00000077984	0.00250621	1.186	TT-specific
KALRN	ENSG00000160145	5.81e-05	1.18504	TT-specific
ENSG00000257767	ENSG00000257767	0.0044031	1.1842	TT-specific
CDA	ENSG00000158825	0.00074415	1.18125	TT-specific
SYNJ2	ENSG00000078269	0.00100611	1.17914	TT-specific
ADK	ENSG00000156110	3.68e-05	1.16307	TT-specific
CYGB	ENSG00000161544	6.83e-05	1.16182	TT-specific
AK8	ENSG00000165695	3.08e-05	1.15705	TT-specific
SLIT3	ENSG00000184347	0.0012971	1.14674	TT-specific
ETNK2	ENSG00000143845	0.00012448	1.14296	TT-specific
L1CAM	ENSG00000198910	2.4e-06	1.14259	TT-specific
TNFRSF10D	ENSG00000173530	5.45e-06	1.13304	TT-specific
JAML	ENSG00000160593	0.00656557	1.13254	TT-specific
APOC1	ENSG00000130208	0.00072834	1.13034	TT-specific
TMEM91	ENSG00000142046	4.27e-05	1.13007	TT-specific
ICAM4	ENSG00000105371	1.01e-05	1.12949	TT-specific
HES2	ENSG00000069812	0.00160205	1.12742	TT-specific
ENSG00000249456	ENSG00000249456	0.00489678	1.1258	TT-specific
PSAT1	ENSG00000135069	6.69e-05	1.11449	TT-specific
TNS2	ENSG00000111077	6.16e-05	1.10658	TT-specific
ALDH4A1	ENSG00000159423	1.69e-07	1.10007	TT-specific
LAMB2	ENSG00000172037	0.00032829	1.08491	TT-specific
CSTA	ENSG00000121552	0.00846966	1.08469	TT-specific
NME4	ENSG00000103202	0.00010393	1.08064	TT-specific
PRKAG2-AS1	ENSG00000239911	1.45e-06	1.07797	TT-specific
ENSG00000289136	ENSG00000289136	0.00049308	1.07555	TT-specific
CAMK2B	ENSG00000058404	0.00213922	1.07425	TT-specific
SULT1A2	ENSG00000197165	0.00465838	1.07404	TT-specific
GSTM3	ENSG00000134202	0.00245647	1.07309	TT-specific
RAC3	ENSG00000169750	9.81e-05	1.06885	TT-specific
EPN2	ENSG00000072134	7.5e-05	1.06762	TT-specific
SEPTIN4	ENSG00000108387	7.61e-06	1.06371	TT-specific
DTNA	ENSG00000134769	8.02e-07	1.06159	TT-specific
GCLC	ENSG00000001084	0.00241038	1.06137	TT-specific
RBP7	ENSG00000162444	0.00012185	1.05933	TT-specific
RGS1	ENSG00000090104	0.00010561	1.0527	TT-specific
AREG	ENSG00000109321	0.00976012	1.04113	TT-specific
SGCB	ENSG00000163069	1.23e-05	1.03604	TT-specific
TRIM2	ENSG00000109654	2.91e-05	1.02913	TT-specific
RETREG1	ENSG00000154153	0.00020138	1.01916	TT-specific
HILPDA	ENSG00000135245	0.00023714	1.01878	TT-specific
PLIN2	ENSG00000147872	0.00016172	1.01481	TT-specific
RAP1GAP	ENSG00000076864	3.28e-06	1.01161	TT-specific
TMEM9B-AS1	ENSG00000254860	0.00055945	1.00784	TT-specific
HS3ST2	ENSG00000122254	0.00496124	1.0034	TT-specific
TMEM158	ENSG00000249992	6.49e-05	1.00324	TT-specific
ARMC9	ENSG00000135931	5.88e-07	1.00167	TT-specific
HCST	ENSG00000126264	0.00657068	0.999743	TT-specific
ENSG00000237550	ENSG00000237550	1.48e-05	0.998841	TT-specific
RPL23AP82	ENSG00000184319	0.00585768	0.992363	TT-specific
ENSG00000290376	ENSG00000290376	0.0004214	0.991778	TT-specific
TIMM10	ENSG00000134809	1.14e-05	0.989043	TT-specific
ST3GAL6-AS1	ENSG00000239445	5.78e-05	0.988381	TT-specific
MRPL23	ENSG00000214026	1.73e-05	0.980844	TT-specific
XYLT1	ENSG00000103489	0.00316821	0.95891	TT-specific
ENSG00000291128	ENSG00000291128	0.00190968	0.957684	TT-specific
ZNF331	ENSG00000130844	0.00792186	0.952329	TT-specific
CLCN4	ENSG00000073464	3.02e-05	0.951779	TT-specific
ISYNA1	ENSG00000105655	0.00104525	0.950581	TT-specific
OLR1	ENSG00000173391	0.00206035	0.944385	TT-specific
SRP9P1	ENSG00000180581	0.00417175	0.941302	TT-specific
ENSG00000291110	ENSG00000291110	0.00847843	0.937391	TT-specific
LINC03014	ENSG00000240859	0.00064461	0.935115	TT-specific
XRRA1	ENSG00000166435	0.00106583	0.931119	TT-specific
STOX2	ENSG00000173320	0.00028152	0.929654	TT-specific
CMBL	ENSG00000164237	0.00057506	0.92663	TT-specific
LINC02975	ENSG00000224307	9.72e-05	0.923765	TT-specific
C11orf96	ENSG00000187479	7.27e-07	0.921385	TT-specific
SSC4D	ENSG00000146700	9.84e-07	0.920694	TT-specific
RFLNB	ENSG00000183688	0.00872344	0.916704	TT-specific
RHOF	ENSG00000139725	2.52e-05	0.915611	TT-specific
ENSG00000226281	ENSG00000226281	0.00045611	0.913617	TT-specific
MEP1A	ENSG00000112818	4.48e-05	0.911132	TT-specific
C17orf97	ENSG00000187624	0.00370483	0.905409	TT-specific
ENSG00000237773	ENSG00000237773	0.00099563	0.904521	TT-specific
CEP70	ENSG00000114107	3.74e-05	0.901212	TT-specific
RPL23AP7	ENSG00000240356	5.17e-05	0.901119	TT-specific
CDH23	ENSG00000107736	1.86e-06	0.900379	TT-specific
TTC12	ENSG00000149292	0.00267084	0.895649	TT-specific
AVPI1	ENSG00000119986	0.00033144	0.89371	TT-specific
CERK	ENSG00000100422	4.88e-05	0.8879	TT-specific
NEDD4L	ENSG00000049759	0.00098958	0.887165	TT-specific
SCOC-AS1	ENSG00000196951	0.00143792	0.88614	TT-specific
MPC2	ENSG00000143158	0.00062206	0.881803	TT-specific
SLC1A5	ENSG00000105281	0.00014389	0.874474	TT-specific
ME1	ENSG00000065833	9.86e-08	0.868945	TT-specific
DTX2P1-UPK3BP1-PMS2P11	ENSG00000265479	0.0041321	0.868784	TT-specific
ECHDC2	ENSG00000121310	0.00042747	0.868343	TT-specific
ENSG00000273272	ENSG00000273272	0.00576993	0.867701	TT-specific
POR	ENSG00000127948	0.00106673	0.866338	TT-specific
TRPA1	ENSG00000104321	0.005122	0.864794	TT-specific
TRAPPC6A	ENSG00000007255	5.49e-09	0.864268	TT-specific
RBM38	ENSG00000132819	0.00585653	0.863062	TT-specific
RPL36A	ENSG00000241343	0.00081561	0.861056	TT-specific
DDIT4	ENSG00000168209	0.00232233	0.85992	TT-specific
TNFSF14	ENSG00000125735	2.67e-07	0.859207	TT-specific
ERCC6L2-AS1	ENSG00000175611	0.00087354	0.858207	TT-specific
SERPINB6	ENSG00000124570	4.07e-05	0.855112	TT-specific
ZNF433-AS1	ENSG00000219665	0.00414842	0.854839	TT-specific
ENSG00000258504	ENSG00000258504	0.00273284	0.852955	TT-specific
GCHFR	ENSG00000137880	0.00941084	0.848938	TT-specific
ATP9A	ENSG00000054793	0.00577659	0.844266	TT-specific
ENSG00000223969	ENSG00000223969	0.00216034	0.836422	TT-specific
SLC16A1	ENSG00000155380	0.00222313	0.835216	TT-specific
DYNLT2B	ENSG00000213123	0.00032996	0.826652	TT-specific
IAH1	ENSG00000134330	6.86e-05	0.826586	TT-specific
HYAL3	ENSG00000186792	0.0010318	0.826052	TT-specific
CYB5A	ENSG00000166347	1.26e-07	0.824465	TT-specific
GPER1	ENSG00000164850	1.06e-05	0.823814	TT-specific
TMEM45A	ENSG00000181458	0.00134523	0.822364	TT-specific
SLC25A29	ENSG00000197119	9.06e-05	0.820733	TT-specific
QPRT	ENSG00000103485	0.0004168	0.819057	TT-specific
ENSG00000288997	ENSG00000288997	0.00079465	0.818329	TT-specific
PDK1-AS1	ENSG00000225205	2.09e-06	0.814172	TT-specific
TET2-AS1	ENSG00000251586	0.00029398	0.81151	TT-specific
TXNRD1	ENSG00000198431	2.4e-06	0.811486	TT-specific
CBFA2T3	ENSG00000129993	0.00292791	0.8106	TT-specific
TBC1D7	ENSG00000145979	2.95e-09	0.807468	TT-specific
TDRD9	ENSG00000156414	3.58e-05	0.805896	TT-specific
CEP112	ENSG00000154240	0.00091077	0.794915	TT-specific
B9D1	ENSG00000108641	0.00719417	0.793414	TT-specific
NBR2	ENSG00000198496	0.00240663	0.792242	TT-specific
PROC	ENSG00000115718	0.00084737	0.792203	TT-specific
SLC66A3	ENSG00000162976	0.00054701	0.790586	TT-specific
PABPC4	ENSG00000090621	2.67e-06	0.78891	TT-specific
RASSF8	ENSG00000123094	3.18e-07	0.787457	TT-specific
ADCY3	ENSG00000138031	1.82e-08	0.781222	TT-specific
AZU1	ENSG00000172232	0.00096682	0.779785	TT-specific
RPS4X	ENSG00000198034	4.69e-05	0.778722	TT-specific
ENSG00000290873	ENSG00000290873	0.00043731	0.776397	TT-specific
ENSG00000261487	ENSG00000261487	0.00949181	0.775752	TT-specific
TRAF4	ENSG00000076604	0.00010761	0.774993	TT-specific
LINC03015	ENSG00000242474	0.00665473	0.773538	TT-specific
TRIB3	ENSG00000101255	0.00016173	0.771066	TT-specific
GEM	ENSG00000164949	0.00023421	0.770842	TT-specific
SLC27A1	ENSG00000130304	5.61e-06	0.769694	TT-specific
VARS2	ENSG00000137411	0.00325451	0.76849	TT-specific
LGALSL	ENSG00000119862	0.00677938	0.768189	TT-specific
HRK	ENSG00000135116	0.00057574	0.767969	TT-specific
ABCB6	ENSG00000115657	0.00119036	0.767795	TT-specific
ASNS	ENSG00000070669	2.53e-05	0.766306	TT-specific
TREM2	ENSG00000095970	0.00069045	0.76594	TT-specific
FXYD2	ENSG00000137731	0.00211444	0.76588	TT-specific
CNKSR3	ENSG00000153721	7.43e-05	0.764655	TT-specific
NATD1	ENSG00000274180	9.14e-06	0.761943	TT-specific
PRKX	ENSG00000183943	0.00404171	0.75515	TT-specific
RPS2P5	ENSG00000240342	0.00379264	0.755076	TT-specific
CHAC1	ENSG00000128965	0.00023741	0.754471	TT-specific
SLC16A5	ENSG00000170190	3.91e-05	0.753455	TT-specific
PTGFRN	ENSG00000134247	0.0042644	0.753053	TT-specific
ITGB1BP1	ENSG00000119185	0.00134468	0.751866	TT-specific
LAMP1	ENSG00000185896	0.0017015	0.744952	TT-specific
MUC20P1	ENSG00000224769	0.00227894	0.743556	TT-specific
POLD4	ENSG00000175482	0.00067745	0.742552	TT-specific
STK32C	ENSG00000165752	9.01e-07	0.74174	TT-specific
GALNS	ENSG00000141012	1.08e-06	0.741196	TT-specific
CMTM8	ENSG00000170293	0.00431481	0.741176	TT-specific
PNPLA4	ENSG00000006757	0.0006304	0.740353	TT-specific
CD9	ENSG00000010278	3.21e-05	0.740184	TT-specific
ENSG00000253123	ENSG00000253123	0.00775513	0.738458	TT-specific
MAD2L2	ENSG00000116670	4.77e-06	0.737804	TT-specific
FAM228B	ENSG00000219626	0.00025142	0.734907	TT-specific
SNHG8	ENSG00000269893	0.00814898	0.734384	TT-specific
ZBTB8OS	ENSG00000176261	9.94e-05	0.731531	TT-specific
RCSD1	ENSG00000198771	2.36e-08	0.730519	TT-specific
ACOT4	ENSG00000177465	0.00645229	0.727864	TT-specific
CXCR5	ENSG00000160683	6.65e-06	0.726657	TT-specific
SGMS2	ENSG00000164023	0.0009805	0.725462	TT-specific
FTLP3	ENSG00000226608	2.53e-05	0.725265	TT-specific
HR	ENSG00000168453	0.00303136	0.724316	TT-specific
GALNT18	ENSG00000110328	0.0001357	0.722965	TT-specific
C7orf50	ENSG00000146540	5.44e-06	0.721181	TT-specific
PINK1	ENSG00000158828	8.01e-06	0.71804	TT-specific
TP53TG1	ENSG00000182165	0.00313186	0.717096	TT-specific
TM4SF19-DYNLT2B	ENSG00000273331	0.00055396	0.716685	TT-specific
MPZL3	ENSG00000160588	0.00025855	0.71601	TT-specific
FCRLB	ENSG00000162746	0.00949058	0.714979	TT-specific
ENSG00000272831	ENSG00000272831	0.00830024	0.71069	TT-specific
PHLPP1	ENSG00000081913	0.00261638	0.710047	TT-specific
RASGEF1A	ENSG00000198915	0.00043365	0.709854	TT-specific
OLFM2	ENSG00000105088	0.00601188	0.708517	TT-specific
FXYD5	ENSG00000089327	2.63e-06	0.706673	TT-specific
SSR4	ENSG00000180879	2.93e-05	0.706016	TT-specific
MPST	ENSG00000128309	0.00418713	0.705908	TT-specific
EMC3	ENSG00000125037	3.07e-05	0.704494	TT-specific
CTH	ENSG00000116761	1.14e-05	0.704222	TT-specific
GPAT3	ENSG00000138678	0.00729357	0.700476	TT-specific
HERC2P9	ENSG00000291082	0.00397034	0.700068	TT-specific
PDPN	ENSG00000162493	0.00911186	-0.700613	AT-specific
HMMR	ENSG00000072571	0.00641245	-0.700756	AT-specific
EHD4	ENSG00000103966	0.00013128	-0.701216	AT-specific
ENPP4	ENSG00000001561	9.74e-05	-0.701417	AT-specific
NUP50	ENSG00000093000	0.00396981	-0.701438	AT-specific
NADK	ENSG00000008130	3.82e-05	-0.701953	AT-specific
IL10RA	ENSG00000110324	3.38e-06	-0.702197	AT-specific
IRAK3	ENSG00000090376	0.0019527	-0.704602	AT-specific
OGFRL1	ENSG00000119900	0.00063634	-0.705201	AT-specific
ADPGK-AS1	ENSG00000260898	3.51e-05	-0.705445	AT-specific
PIK3R1	ENSG00000145675	0.00010251	-0.705667	AT-specific
MCUB	ENSG00000005059	0.00713887	-0.706684	AT-specific
THEMIS2	ENSG00000130775	1.09e-05	-0.710112	AT-specific
VDR	ENSG00000111424	9.23e-05	-0.710437	AT-specific
LILRB3	ENSG00000204577	0.00012076	-0.712289	AT-specific
CERS6	ENSG00000172292	2.4e-06	-0.713009	AT-specific
AKAP7	ENSG00000118507	0.00999675	-0.713041	AT-specific
ANKRD12	ENSG00000101745	0.00534806	-0.713652	AT-specific
PTGR2	ENSG00000140043	8.47e-05	-0.714526	AT-specific
CCNE2	ENSG00000175305	0.00463272	-0.714531	AT-specific
GALNT4	ENSG00000257594	2.49e-05	-0.715772	AT-specific
DCK	ENSG00000156136	4.82e-05	-0.716376	AT-specific
GTF2B	ENSG00000137947	4.63e-05	-0.716386	AT-specific
RET	ENSG00000165731	0.00739921	-0.718908	AT-specific
CSF1R	ENSG00000182578	5.97e-06	-0.719451	AT-specific
TRIM38	ENSG00000112343	1.02e-05	-0.720357	AT-specific
ABRACL	ENSG00000146386	0.00374328	-0.721452	AT-specific
NHLRC3	ENSG00000188811	5.97e-05	-0.723434	AT-specific
EXT1	ENSG00000182197	0.00059412	-0.724901	AT-specific
CYLD	ENSG00000083799	9.17e-06	-0.725603	AT-specific
YEATS2	ENSG00000163872	0.00020376	-0.726009	AT-specific
OGFR	ENSG00000060491	6.76e-07	-0.727294	AT-specific
PANX1	ENSG00000110218	0.00034754	-0.729237	AT-specific
TMEM150B	ENSG00000180061	1.13e-05	-0.729995	AT-specific
DISC1	ENSG00000162946	2.41e-05	-0.73005	AT-specific
BEX3	ENSG00000166681	0.00082881	-0.732843	AT-specific
ENTPD5	ENSG00000187097	0.00146989	-0.73456	AT-specific
CTSV	ENSG00000136943	0.00117006	-0.735011	AT-specific
TJP1	ENSG00000104067	0.00069999	-0.735375	AT-specific
MALAT1	ENSG00000251562	0.00966967	-0.735872	AT-specific
ZNRF2	ENSG00000180233	0.00010087	-0.736384	AT-specific
IFNAR2	ENSG00000159110	0.00414715	-0.736836	AT-specific
HACD4	ENSG00000188921	0.0002008	-0.737697	AT-specific
BLVRA	ENSG00000106605	0.00017428	-0.738573	AT-specific
CAPN3	ENSG00000092529	0.00055945	-0.741542	AT-specific
RIPK2	ENSG00000104312	4.88e-07	-0.742273	AT-specific
KAT2B	ENSG00000114166	0.00044402	-0.743906	AT-specific
RNF19A	ENSG00000034677	0.00094732	-0.744335	AT-specific
SNX10-AS1	ENSG00000225792	0.00282224	-0.744662	AT-specific
ENSG00000259972	ENSG00000259972	0.00993304	-0.745187	AT-specific
CYBC1	ENSG00000178927	5.68e-11	-0.745497	AT-specific
CLSTN1	ENSG00000171603	0.00177564	-0.745633	AT-specific
CASP8	ENSG00000064012	0.0002109	-0.746198	AT-specific
LGALS9	ENSG00000168961	0.00012082	-0.747166	AT-specific
DIP2B	ENSG00000066084	2.81e-05	-0.749958	AT-specific
ENSG00000267002	ENSG00000267002	0.00137532	-0.751937	AT-specific
FMR1	ENSG00000102081	6.12e-05	-0.752276	AT-specific
SLCO4A1	ENSG00000101187	0.00023749	-0.752361	AT-specific
FEM1C	ENSG00000145780	0.00085134	-0.75392	AT-specific
DOCK8	ENSG00000107099	0.0002811	-0.754733	AT-specific
CHI3L2	ENSG00000064886	0.00945174	-0.75591	AT-specific
SCRN1	ENSG00000136193	0.00154723	-0.75624	AT-specific
WASL	ENSG00000106299	3.68e-05	-0.756246	AT-specific
REC8	ENSG00000100918	0.00523019	-0.756846	AT-specific
SLC7A11	ENSG00000151012	0.0096312	-0.758747	AT-specific
ZBED1	ENSG00000214717	1.19e-05	-0.759371	AT-specific
NA	ENSG00000214717.12_PAR_Y	1.19e-05	-0.759371	AT-specific
NAGK	ENSG00000124357	0.00011021	-0.760055	AT-specific
NT5C2	ENSG00000076685	7.46e-06	-0.76007	AT-specific
RNF138	ENSG00000134758	0.00020266	-0.760328	AT-specific
TRIM56	ENSG00000169871	0.00125669	-0.760391	AT-specific
BIRC3	ENSG00000023445	0.0024849	-0.762892	AT-specific
AP1S2	ENSG00000182287	6.92e-06	-0.763984	AT-specific
ADCY7	ENSG00000121281	1.39e-08	-0.765131	AT-specific
TVP23C-CDRT4	ENSG00000259024	0.00849912	-0.765896	AT-specific
STIMATE	ENSG00000213533	0.0004865	-0.766872	AT-specific
IRF1-AS1	ENSG00000197536	0.00568069	-0.771393	AT-specific
TRIM26	ENSG00000234127	4.03e-05	-0.772408	AT-specific
TEC	ENSG00000135605	0.00036927	-0.772478	AT-specific
SASH3	ENSG00000122122	0.00016172	-0.772805	AT-specific
SGTB	ENSG00000197860	9.35e-05	-0.773938	AT-specific
ZNF718	ENSG00000250312	5.62e-05	-0.774518	AT-specific
BCOR	ENSG00000183337	9.84e-07	-0.77547	AT-specific
LAIR1	ENSG00000167613	0.00031104	-0.776125	AT-specific
BATF3	ENSG00000123685	0.0018093	-0.776325	AT-specific
HMGB1P3	ENSG00000250011	0.0093613	-0.7807	AT-specific
PTGS1	ENSG00000095303	3.41e-05	-0.782095	AT-specific
LILRB2	ENSG00000131042	0.00270529	-0.782172	AT-specific
FAM111A	ENSG00000166801	6.14e-05	-0.782431	AT-specific
LINC02777	ENSG00000232453	0.00371843	-0.783274	AT-specific
SIPA1L1	ENSG00000197555	0.00024993	-0.784283	AT-specific
ELL2	ENSG00000118985	0.00141765	-0.784925	AT-specific
NBN	ENSG00000104320	0.00069265	-0.787591	AT-specific
RBCK1	ENSG00000125826	7.84e-06	-0.787902	AT-specific
ELK3	ENSG00000111145	1.4e-05	-0.788842	AT-specific
LINC02542	ENSG00000226453	0.0008985	-0.789167	AT-specific
RAB24	ENSG00000169228	2.43e-05	-0.789767	AT-specific
LIMD1-AS1	ENSG00000230530	0.00038342	-0.791102	AT-specific
ANKRD29	ENSG00000154065	0.00033832	-0.794526	AT-specific
CORO1A	ENSG00000102879	3.24e-06	-0.795775	AT-specific
TM4SF19-AS1	ENSG00000235897	0.00851521	-0.796931	AT-specific
ENSG00000287263	ENSG00000287263	0.00143792	-0.797208	AT-specific
MIR142HG	ENSG00000265206	0.00043182	-0.798185	AT-specific
LIMK2	ENSG00000182541	1.13e-08	-0.798946	AT-specific
SWT1	ENSG00000116668	9.13e-05	-0.79936	AT-specific
ANPEP	ENSG00000166825	0.00013795	-0.800046	AT-specific
CENPN	ENSG00000166451	0.00207511	-0.800656	AT-specific
C1QB	ENSG00000173369	0.00085806	-0.805071	AT-specific
SLC30A1	ENSG00000170385	0.00090612	-0.805825	AT-specific
BLNK	ENSG00000095585	7.64e-05	-0.805954	AT-specific
ADAP2	ENSG00000184060	5.16e-05	-0.808248	AT-specific
POMZP3	ENSG00000146707	0.00299894	-0.809386	AT-specific
CBX6	ENSG00000183741	0.0015154	-0.809821	AT-specific
LRRC25	ENSG00000175489	0.00269879	-0.81136	AT-specific
PLK1	ENSG00000166851	0.00203012	-0.813366	AT-specific
ZC3H12A	ENSG00000163874	9.14e-06	-0.81347	AT-specific
GOLGA8A	ENSG00000175265	0.00152403	-0.815963	AT-specific
NAMPT	ENSG00000105835	0.00130258	-0.817118	AT-specific
CD72	ENSG00000137101	0.00065296	-0.818338	AT-specific
C15orf48	ENSG00000166920	6.14e-06	-0.819501	AT-specific
FPR3	ENSG00000187474	0.00051834	-0.82076	AT-specific
AMD1	ENSG00000123505	0.00106951	-0.82077	AT-specific
DSTNP1	ENSG00000230982	0.00916351	-0.821876	AT-specific
RERE	ENSG00000142599	4.48e-05	-0.822566	AT-specific
ENSG00000254929	ENSG00000254929	0.00245017	-0.823594	AT-specific
USP30-AS1	ENSG00000256262	0.00340305	-0.82735	AT-specific
ENSG00000250378	ENSG00000250378	1.03e-06	-0.827742	AT-specific
CDCP1	ENSG00000163814	0.00165951	-0.829614	AT-specific
MUC20	ENSG00000176945	0.0012855	-0.829926	AT-specific
TNFRSF11A	ENSG00000141655	8.86e-05	-0.830372	AT-specific
INPP5D	ENSG00000168918	9.21e-05	-0.832121	AT-specific
FMN1	ENSG00000248905	5.35e-05	-0.832381	AT-specific
PARP11	ENSG00000111224	0.00014344	-0.833088	AT-specific
FBXO32	ENSG00000156804	0.00059722	-0.833801	AT-specific
PDE4B	ENSG00000184588	0.00313403	-0.835282	AT-specific
MAML2	ENSG00000184384	2.41e-05	-0.838359	AT-specific
MGAT4A	ENSG00000071073	0.00763427	-0.839782	AT-specific
MOV10	ENSG00000155363	0.00158076	-0.839985	AT-specific
ARHGAP27	ENSG00000159314	0.00526497	-0.840347	AT-specific
ZNF124	ENSG00000196418	1.36e-06	-0.840943	AT-specific
CD40	ENSG00000101017	0.00541319	-0.841001	AT-specific
ENSG00000285608	ENSG00000285608	0.00027574	-0.844288	AT-specific
TMEM273	ENSG00000204161	0.00103276	-0.845737	AT-specific
ZNF467	ENSG00000181444	0.0013463	-0.847239	AT-specific
FCRL6	ENSG00000181036	2.76e-05	-0.848233	AT-specific
CPM	ENSG00000135678	0.0004741	-0.848367	AT-specific
BLTP1	ENSG00000138688	0.00030112	-0.848993	AT-specific
SFMBT2	ENSG00000198879	1.77e-07	-0.850866	AT-specific
TFEC	ENSG00000105967	2.31e-05	-0.851699	AT-specific
STK17B	ENSG00000081320	0.0004366	-0.852511	AT-specific
HLA-F-AS1	ENSG00000214922	0.00989112	-0.852535	AT-specific
HPS5	ENSG00000110756	3.51e-05	-0.852739	AT-specific
STOM	ENSG00000148175	2.14e-06	-0.853604	AT-specific
CLEC1A	ENSG00000150048	0.00087501	-0.855127	AT-specific
CCR5	ENSG00000160791	4.88e-05	-0.855254	AT-specific
GTF2H2	ENSG00000145736	0.00471898	-0.858716	AT-specific
CFP	ENSG00000126759	0.00455887	-0.859435	AT-specific
CBR1	ENSG00000159228	5.3e-06	-0.859578	AT-specific
SCARF1	ENSG00000074660	0.00013127	-0.861359	AT-specific
ENSG00000259354	ENSG00000259354	0.00667409	-0.861419	AT-specific
SLC7A7	ENSG00000155465	4.77e-06	-0.862317	AT-specific
CLEC7A	ENSG00000172243	0.0001357	-0.864232	AT-specific
FCGR1CP	ENSG00000265531	0.00937847	-0.866584	AT-specific
EXOSC9	ENSG00000123737	0.00206527	-0.867097	AT-specific
CA2	ENSG00000104267	0.00362541	-0.86812	AT-specific
LYN	ENSG00000254087	0.0001309	-0.868825	AT-specific
ADGRE2	ENSG00000127507	0.0029406	-0.870066	AT-specific
AGAP9	ENSG00000204172	3.99e-06	-0.870202	AT-specific
AGRN	ENSG00000188157	9.44e-06	-0.870244	AT-specific
TRAFD1	ENSG00000135148	5.57e-05	-0.871578	AT-specific
RAD9A	ENSG00000172613	0.00014612	-0.872893	AT-specific
ENSG00000260877	ENSG00000260877	0.00824981	-0.873098	AT-specific
EPHB2	ENSG00000133216	0.0031804	-0.873564	AT-specific
HTATSF1P2	ENSG00000271361	3.23e-07	-0.874848	AT-specific
SNX20	ENSG00000167208	1.09e-05	-0.877567	AT-specific
CD300LF	ENSG00000186074	1.56e-05	-0.878065	AT-specific
BMPR2	ENSG00000204217	9.84e-05	-0.879423	AT-specific
RBMS2	ENSG00000076067	0.00736006	-0.880744	AT-specific
SP100	ENSG00000067066	1.56e-05	-0.882086	AT-specific
ITPRIPL2	ENSG00000205730	9.1e-08	-0.882346	AT-specific
BAZ1A	ENSG00000198604	4.5e-05	-0.885411	AT-specific
CMIP	ENSG00000153815	2.36e-09	-0.887763	AT-specific
GTPBP1	ENSG00000100226	0.00155435	-0.88998	AT-specific
ACSM5	ENSG00000183549	0.00256359	-0.895615	AT-specific
MOB3B	ENSG00000120162	0.00063651	-0.8973	AT-specific
INTS6L	ENSG00000165359	3.86e-05	-0.897444	AT-specific
CD2AP	ENSG00000198087	0.00014256	-0.898958	AT-specific
PLD4	ENSG00000166428	0.00284395	-0.899004	AT-specific
MSR1	ENSG00000038945	0.00057506	-0.899273	AT-specific
MIR155HG	ENSG00000234883	0.00183425	-0.899725	AT-specific
FCGR3A	ENSG00000203747	0.0063274	-0.902416	AT-specific
BTN2A1	ENSG00000112763	3.11e-09	-0.902876	AT-specific
NRIP1	ENSG00000180530	7.81e-05	-0.903107	AT-specific
SLC18B1	ENSG00000146409	3.51e-05	-0.907137	AT-specific
C3AR1	ENSG00000171860	0.00353375	-0.908133	AT-specific
SLFN11	ENSG00000172716	0.00164455	-0.911528	AT-specific
ARHGAP24	ENSG00000138639	1.97e-06	-0.91194	AT-specific
GALM	ENSG00000143891	0.00030318	-0.91222	AT-specific
ZNF841	ENSG00000197608	9.07e-06	-0.913391	AT-specific
DEK	ENSG00000124795	1.52e-06	-0.914463	AT-specific
MACF1	ENSG00000127603	2.11e-06	-0.918311	AT-specific
HDX	ENSG00000165259	0.00013388	-0.919125	AT-specific
PSMB8	ENSG00000204264	0.00065155	-0.921032	AT-specific
RESF1	ENSG00000174718	3.09e-05	-0.922724	AT-specific
LRRK2	ENSG00000188906	7.43e-05	-0.923306	AT-specific
ZNF731P	ENSG00000227671	5.08e-05	-0.924074	AT-specific
ENSG00000259865	ENSG00000259865	1.47e-06	-0.925998	AT-specific
C1orf21	ENSG00000116667	6.99e-05	-0.926022	AT-specific
LINC02785	ENSG00000226822	0.00709752	-0.9285	AT-specific
GPRC5D-AS1	ENSG00000247498	0.0019766	-0.929473	AT-specific
TNFSF12-TNFSF13	ENSG00000248871	0.00343497	-0.931198	AT-specific
FAM8A1	ENSG00000137414	3.16e-05	-0.93268	AT-specific
ANKFY1	ENSG00000185722	7.22e-06	-0.933889	AT-specific
MYO10	ENSG00000145555	0.00119699	-0.934504	AT-specific
LINC02978	ENSG00000265743	0.00790257	-0.934544	AT-specific
TCF7L2	ENSG00000148737	3.1e-05	-0.936146	AT-specific
IL18	ENSG00000150782	0.00090646	-0.936338	AT-specific
MLKL	ENSG00000168404	0.00063505	-0.939291	AT-specific
ITGA4	ENSG00000115232	4.13e-05	-0.939322	AT-specific
SPTLC2	ENSG00000100596	0.00060284	-0.944133	AT-specific
GCNT1	ENSG00000187210	0.00590798	-0.945281	AT-specific
BAALC	ENSG00000164929	0.00295018	-0.947201	AT-specific
LINC01410	ENSG00000238113	0.00023466	-0.94935	AT-specific
IRF1	ENSG00000125347	7.9e-07	-0.951104	AT-specific
GPR155	ENSG00000163328	4.9e-05	-0.951669	AT-specific
TICAM2	ENSG00000243414	0.00255474	-0.952837	AT-specific
CASP10	ENSG00000003400	0.00026034	-0.954217	AT-specific
CKB	ENSG00000166165	0.00092745	-0.956023	AT-specific
ADGRE1	ENSG00000174837	0.00019463	-0.959059	AT-specific
TRIM69	ENSG00000185880	0.0002853	-0.961613	AT-specific
FAM72B	ENSG00000188610	0.00084737	-0.962689	AT-specific
PCED1B-AS1	ENSG00000247774	0.00672215	-0.96343	AT-specific
RNF144B	ENSG00000137393	2.64e-05	-0.964339	AT-specific
UNC93B1	ENSG00000110057	1.84e-05	-0.964584	AT-specific
MYD88	ENSG00000172936	0.00033262	-0.966281	AT-specific
C1QA	ENSG00000173372	0.00014906	-0.967734	AT-specific
GATM	ENSG00000171766	0.00222073	-0.968525	AT-specific
ENSG00000269053	ENSG00000269053	0.00529231	-0.9733	AT-specific
MVB12B	ENSG00000196814	0.00051834	-0.977573	AT-specific
PI4K2B	ENSG00000038210	0.00098648	-0.978192	AT-specific
ENSG00000288924	ENSG00000288924	6.02e-06	-0.980954	AT-specific
SP140L	ENSG00000185404	9.44e-05	-0.981434	AT-specific
ZNF710	ENSG00000140548	9.44e-06	-0.983117	AT-specific
SRGAP2B	ENSG00000196369	0.00026518	-0.984573	AT-specific
TMEM229B	ENSG00000198133	0.0026929	-0.985224	AT-specific
MARCKSL1	ENSG00000175130	2.57e-06	-0.987263	AT-specific
CDK1	ENSG00000170312	0.00717644	-0.990047	AT-specific
LAMB1	ENSG00000091136	0.00375857	-0.994227	AT-specific
TEKT4P2	ENSG00000291050	0.00014338	-0.994298	AT-specific
DYNLT1	ENSG00000146425	0.0001475	-0.995987	AT-specific
RIN2	ENSG00000132669	1.9e-05	-0.99859	AT-specific
RHOU	ENSG00000116574	1.06e-07	-0.999906	AT-specific
ENSG00000260772	ENSG00000260772	0.0011211	-1.00044	AT-specific
PSMB8-AS1	ENSG00000204261	0.00020307	-1.00272	AT-specific
ENSG00000255921	ENSG00000255921	0.00017317	-1.00315	AT-specific
ICAM1	ENSG00000090339	3.48e-08	-1.00413	AT-specific
GRIN3A	ENSG00000198785	1.03e-05	-1.00679	AT-specific
MARCHF1	ENSG00000145416	0.00066467	-1.00899	AT-specific
NLRP3	ENSG00000162711	0.00068655	-1.01327	AT-specific
NLRC5	ENSG00000140853	0.00042535	-1.01339	AT-specific
IKBKE	ENSG00000263528	0.00207814	-1.01376	AT-specific
PARP12	ENSG00000059378	2.12e-05	-1.01386	AT-specific
BACE2	ENSG00000182240	0.00300321	-1.01498	AT-specific
NCF1	ENSG00000158517	0.00145452	-1.01699	AT-specific
KIAA1671	ENSG00000197077	0.00254028	-1.0182	AT-specific
ODF3B	ENSG00000177989	6.2e-05	-1.01999	AT-specific
MYC	ENSG00000136997	2.95e-09	-1.02059	AT-specific
ENSG00000290867	ENSG00000290867	0.0022319	-1.02455	AT-specific
DNAAF1	ENSG00000154099	0.00803228	-1.02473	AT-specific
CKAP4	ENSG00000136026	0.00013408	-1.0263	AT-specific
ENSG00000263165	ENSG00000263165	0.00504747	-1.02697	AT-specific
ZNF107	ENSG00000196247	0.00526365	-1.02703	AT-specific
TRIM21	ENSG00000132109	3.57e-05	-1.02794	AT-specific
HMGN2P46	ENSG00000179362	0.00234185	-1.02826	AT-specific
MCL1	ENSG00000143384	2.65e-08	-1.02828	AT-specific
CISH	ENSG00000114737	0.00244286	-1.02893	AT-specific
RICTOR	ENSG00000164327	2.72e-05	-1.02985	AT-specific
JAK2	ENSG00000096968	0.00153288	-1.0305	AT-specific
RN7SL138P	ENSG00000266274	0.00324505	-1.03294	AT-specific
NFE2L3	ENSG00000050344	0.00086358	-1.034	AT-specific
NCOA7	ENSG00000111912	0.00037	-1.03667	AT-specific
DOCK10	ENSG00000135905	0.00227091	-1.03804	AT-specific
RUBCN	ENSG00000145016	0.00019463	-1.04224	AT-specific
ITPR2	ENSG00000123104	2e-05	-1.04294	AT-specific
RTCB	ENSG00000100220	0.00015885	-1.04403	AT-specific
ZNFX1	ENSG00000124201	0.00011493	-1.0471	AT-specific
LRRC8C	ENSG00000171488	7.23e-06	-1.04728	AT-specific
C1GALT1	ENSG00000106392	2.7e-05	-1.05032	AT-specific
JAK3	ENSG00000105639	0.00072309	-1.05068	AT-specific
PIK3CD	ENSG00000171608	1.31e-06	-1.05339	AT-specific
SUGCT-AS1	ENSG00000203446	5.85e-08	-1.05448	AT-specific
NUB1	ENSG00000013374	0.0002512	-1.05859	AT-specific
CHROMR	ENSG00000223960	0.00051834	-1.05883	AT-specific
JADE2	ENSG00000043143	1.13e-05	-1.06007	AT-specific
ID3	ENSG00000117318	0.00242525	-1.06162	AT-specific
BLZF1	ENSG00000117475	0.00047956	-1.06559	AT-specific
ENSG00000264456	ENSG00000264456	1.14e-05	-1.06728	AT-specific
EHBP1L1	ENSG00000173442	1.33e-05	-1.06789	AT-specific
ID2	ENSG00000115738	1.14e-05	-1.06802	AT-specific
PTGES3P1	ENSG00000234518	0.00040712	-1.07563	AT-specific
ALOX5AP	ENSG00000132965	0.00012953	-1.07763	AT-specific
GJA5	ENSG00000265107	0.001061	-1.07878	AT-specific
TENT5A	ENSG00000112773	0.00082498	-1.07896	AT-specific
HISLA	ENSG00000258867	0.00044604	-1.07932	AT-specific
ENSG00000267745	ENSG00000267745	0.00066597	-1.0794	AT-specific
IL1B	ENSG00000125538	0.0038313	-1.07953	AT-specific
PIK3R6	ENSG00000276231	0.00017812	-1.08374	AT-specific
TREM1	ENSG00000124731	1.33e-05	-1.08559	AT-specific
RNASE2	ENSG00000169385	7.59e-06	-1.08562	AT-specific
FBXO6	ENSG00000116663	3.09e-05	-1.0867	AT-specific
XRN1	ENSG00000114127	0.00270529	-1.08887	AT-specific
GAS6	ENSG00000183087	0.00430462	-1.09139	AT-specific
ABCG1	ENSG00000160179	0.00536988	-1.09437	AT-specific
LINC01181	ENSG00000250929	0.00039679	-1.09725	AT-specific
ANO5	ENSG00000171714	1.75e-05	-1.10073	AT-specific
ADAR	ENSG00000160710	3.57e-05	-1.10122	AT-specific
ZC3HAV1	ENSG00000105939	9.29e-05	-1.10245	AT-specific
TRANK1	ENSG00000168016	0.00069265	-1.10575	AT-specific
TAGAP	ENSG00000164691	0.00300321	-1.10876	AT-specific
GIMAP2	ENSG00000106560	0.0001113	-1.11005	AT-specific
PHF11	ENSG00000136147	9.44e-06	-1.11309	AT-specific
CCDC200	ENSG00000236383	0.00084737	-1.11536	AT-specific
NAIP	ENSG00000249437	1.09e-05	-1.11561	AT-specific
NOD2	ENSG00000167207	0.00140342	-1.11597	AT-specific
TMEM268	ENSG00000157693	0.00029778	-1.11691	AT-specific
CCZ1	ENSG00000122674	6.3e-05	-1.11702	AT-specific
CLEC4A	ENSG00000111729	0.00478964	-1.11862	AT-specific
PLS3	ENSG00000102024	0.00681175	-1.11895	AT-specific
SSTR2	ENSG00000180616	2.37e-05	-1.1214	AT-specific
SLAMF1	ENSG00000117090	0.00171472	-1.12444	AT-specific
PTAFR	ENSG00000169403	1.39e-08	-1.12518	AT-specific
PALM2AKAP2	ENSG00000157654	0.0001582	-1.13812	AT-specific
LMNB1	ENSG00000113368	1.27e-05	-1.13816	AT-specific
LINC01358	ENSG00000237352	0.00101355	-1.13946	AT-specific
ZNF277	ENSG00000198839	0.00013098	-1.14022	AT-specific
AOC1	ENSG00000002726	0.0085032	-1.14088	AT-specific
IRF9	ENSG00000213928	1.59e-05	-1.14223	AT-specific
GSDMD	ENSG00000104518	9.44e-10	-1.14485	AT-specific
CD180	ENSG00000134061	0.0004295	-1.14504	AT-specific
PMP22	ENSG00000109099	0.00581845	-1.14901	AT-specific
LINC01506	ENSG00000234506	0.00522815	-1.15238	AT-specific
ABI3	ENSG00000108798	0.00267393	-1.15323	AT-specific
MS4A7	ENSG00000166927	0.00078291	-1.15387	AT-specific
LINC00623	ENSG00000226067	2.36e-05	-1.15703	AT-specific
CLEC2D	ENSG00000069493	0.00021689	-1.16154	AT-specific
PSTPIP2	ENSG00000152229	0.0002966	-1.16305	AT-specific
CCL22	ENSG00000102962	0.00143792	-1.16523	AT-specific
UBE2D1	ENSG00000072401	5.62e-06	-1.16766	AT-specific
TASL	ENSG00000120280	1.08e-07	-1.16865	AT-specific
CMTR1	ENSG00000137200	5.25e-05	-1.17332	AT-specific
ASCL2	ENSG00000183734	8e-05	-1.17564	AT-specific
SLAMF6	ENSG00000162739	0.00079303	-1.18704	AT-specific
DAPP1	ENSG00000070190	1.03e-07	-1.18763	AT-specific
N4BP1	ENSG00000102921	1.39e-06	-1.19445	AT-specific
LMO2	ENSG00000135363	0.00060517	-1.19552	AT-specific
ENSG00000284634	ENSG00000284634	0.00594021	-1.19777	AT-specific
TNFSF13	ENSG00000161955	2.67e-06	-1.20381	AT-specific
RBM43	ENSG00000184898	5.02e-05	-1.20866	AT-specific
ENSG00000250138	ENSG00000250138	2.4e-06	-1.21256	AT-specific
TNFSF15	ENSG00000181634	0.00717654	-1.2152	AT-specific
RPLP0P2	ENSG00000243742	0.00109175	-1.21768	AT-specific
PARP10	ENSG00000178685	3.6e-06	-1.2187	AT-specific
CYSLTR1	ENSG00000173198	1.65e-06	-1.21947	AT-specific
ETV5	ENSG00000244405	3.95e-06	-1.21965	AT-specific
MAFB	ENSG00000204103	0.00110459	-1.22417	AT-specific
APOBEC3F	ENSG00000128394	0.00038677	-1.22726	AT-specific
SLFN5	ENSG00000166750	0.00321485	-1.22822	AT-specific
ENSG00000272345	ENSG00000272345	0.00092326	-1.23453	AT-specific
MIR3945HG	ENSG00000251230	4.57e-05	-1.23767	AT-specific
TMEM106A	ENSG00000184988	5.49e-06	-1.23942	AT-specific
ATP8A1	ENSG00000124406	6.02e-06	-1.24449	AT-specific
GPR84	ENSG00000139572	0.00038505	-1.25207	AT-specific
ZNG1C	ENSG00000196873	0.00217821	-1.25239	AT-specific
BAMBI	ENSG00000095739	0.00012855	-1.25348	AT-specific
CCL23	ENSG00000274736	0.00030656	-1.25383	AT-specific
MS4A4A	ENSG00000110079	3.08e-06	-1.25593	AT-specific
PDCD1LG2	ENSG00000197646	7.68e-06	-1.25647	AT-specific
KIAA0040	ENSG00000235750	3.67e-05	-1.25823	AT-specific
CNP	ENSG00000173786	2.87e-05	-1.25894	AT-specific
ATF5	ENSG00000169136	3.38e-06	-1.26215	AT-specific
ENSG00000291135	ENSG00000291135	6.39e-05	-1.26391	AT-specific
MPEG1	ENSG00000197629	0.00013795	-1.264	AT-specific
CARD16	ENSG00000204397	0.00019365	-1.26537	AT-specific
MYO1G	ENSG00000136286	0.00106583	-1.26696	AT-specific
ENSG00000248187	ENSG00000248187	4.9e-05	-1.26996	AT-specific
SERPINE2	ENSG00000135919	1.9e-05	-1.27059	AT-specific
NCF1B	ENSG00000290838	0.00390506	-1.27299	AT-specific
GFRA2	ENSG00000168546	7.85e-07	-1.27305	AT-specific
SLFN12	ENSG00000172123	1.79e-05	-1.27382	AT-specific
SLC25A28	ENSG00000155287	8.18e-06	-1.28332	AT-specific
GBP3	ENSG00000117226	0.00011628	-1.28341	AT-specific
BISPR	ENSG00000282851	1.87e-05	-1.28877	AT-specific
KCTD12	ENSG00000178695	2.55e-09	-1.28882	AT-specific
DOK2	ENSG00000147443	1.23e-05	-1.29178	AT-specific
MARCKS	ENSG00000277443	1.87e-05	-1.29647	AT-specific
PCLAF	ENSG00000166803	0.00437603	-1.29894	AT-specific
ITGB8	ENSG00000105855	6.53e-05	-1.30076	AT-specific
SOCS1	ENSG00000185338	0.00010408	-1.30141	AT-specific
TNIP3	ENSG00000050730	0.00014366	-1.30235	AT-specific
ADAMTSL4	ENSG00000143382	9.4e-06	-1.30798	AT-specific
LGALS3BP	ENSG00000108679	0.0001887	-1.31024	AT-specific
TDRD7	ENSG00000196116	2.7e-05	-1.31068	AT-specific
SCO2	ENSG00000284194	0.0006702	-1.31114	AT-specific
TYMP	ENSG00000025708	1.41e-07	-1.31122	AT-specific
PPM1N	ENSG00000213889	5.44e-08	-1.31224	AT-specific
LINC02574	ENSG00000233975	0.00028656	-1.31294	AT-specific
IL15	ENSG00000164136	6.45e-05	-1.31598	AT-specific
CMKLR1	ENSG00000174600	0.00012947	-1.31866	AT-specific
SSB	ENSG00000138385	9.5e-05	-1.31928	AT-specific
RGL1	ENSG00000143344	4.88e-05	-1.32279	AT-specific
MASTL	ENSG00000120539	0.00012925	-1.32552	AT-specific
PHACTR4	ENSG00000204138	2.63e-06	-1.3272	AT-specific
ZNF618	ENSG00000157657	6.28e-05	-1.33008	AT-specific
NMI	ENSG00000123609	2.33e-05	-1.33634	AT-specific
LYSMD2	ENSG00000140280	5.61e-06	-1.33721	AT-specific
SERPINB9	ENSG00000170542	4.85e-06	-1.34515	AT-specific
TRIM25	ENSG00000121060	4.22e-06	-1.34563	AT-specific
ENSG00000277400	ENSG00000277400	2.14e-05	-1.34651	AT-specific
LILRA5	ENSG00000187116	0.00039679	-1.36024	AT-specific
RND3	ENSG00000115963	0.00013799	-1.36265	AT-specific
GIMAP1-GIMAP5	ENSG00000281887	0.00906332	-1.36525	AT-specific
TYMS	ENSG00000176890	0.00730115	-1.3671	AT-specific
FGD2	ENSG00000146192	0.00068359	-1.37063	AT-specific
CD47	ENSG00000196776	3.81e-05	-1.37736	AT-specific
ACVRL1	ENSG00000139567	1.82e-05	-1.37913	AT-specific
TAP1	ENSG00000168394	2.06e-05	-1.37931	AT-specific
TRIM5	ENSG00000132256	0.00174578	-1.38097	AT-specific
PTGER2	ENSG00000125384	1.84e-05	-1.38451	AT-specific
SHFL	ENSG00000130813	0.00017428	-1.38843	AT-specific
STING1	ENSG00000184584	2.71e-08	-1.38905	AT-specific
CCL3	ENSG00000277632	1.48e-05	-1.38934	AT-specific
MCOLN2	ENSG00000153898	0.003703	-1.39173	AT-specific
TRIM34	ENSG00000258659	9.53e-06	-1.39371	AT-specific
SPRED1	ENSG00000166068	4.23e-06	-1.40554	AT-specific
UBA7	ENSG00000182179	2.19e-05	-1.40693	AT-specific
GIMAP4	ENSG00000133574	0.00616004	-1.40969	AT-specific
LINC00996	ENSG00000242258	0.0001742	-1.41266	AT-specific
CLEC12A	ENSG00000172322	0.00937847	-1.41928	AT-specific
SRGAP2	ENSG00000266028	1.09e-05	-1.43148	AT-specific
LILRB1	ENSG00000104972	2.67e-06	-1.43267	AT-specific
OLIG1	ENSG00000184221	0.00175996	-1.44047	AT-specific
CFB	ENSG00000243649	0.00024514	-1.4432	AT-specific
ENSG00000289692	ENSG00000289692	0.00206722	-1.44552	AT-specific
TRIM14	ENSG00000106785	5.97e-05	-1.44648	AT-specific
UBE2L6	ENSG00000156587	4.4e-05	-1.44902	AT-specific
RNF19B	ENSG00000116514	3.32e-05	-1.45036	AT-specific
CD274	ENSG00000120217	3.3e-05	-1.45085	AT-specific
PLEKHA7	ENSG00000166689	3.9e-06	-1.45289	AT-specific
DSP	ENSG00000096696	1.5e-05	-1.45833	AT-specific
TCF4	ENSG00000196628	1.47e-05	-1.45952	AT-specific
VAV3	ENSG00000134215	6.04e-05	-1.46003	AT-specific
HPGD	ENSG00000164120	0.00343424	-1.46386	AT-specific
BST2	ENSG00000130303	6.55e-06	-1.46483	AT-specific
IFI16	ENSG00000163565	1.97e-06	-1.46811	AT-specific
DEF6	ENSG00000023892	5.31e-10	-1.46961	AT-specific
LPAR1	ENSG00000198121	3.92e-08	-1.47885	AT-specific
PTGIR	ENSG00000160013	2.9e-05	-1.4789	AT-specific
ST8SIA4	ENSG00000113532	3.94e-06	-1.48367	AT-specific
METTL7B	ENSG00000170439	0.00878971	-1.49242	AT-specific
FFAR2	ENSG00000126262	0.00037723	-1.49694	AT-specific
DTX3L	ENSG00000163840	1.37e-05	-1.50197	AT-specific
CLEC4E	ENSG00000166523	0.00124334	-1.50248	AT-specific
ENSG00000267520	ENSG00000267520	0.00036398	-1.50534	AT-specific
RAB39A	ENSG00000179331	9.3e-07	-1.51812	AT-specific
SLA	ENSG00000155926	5.49e-09	-1.52032	AT-specific
MNDA	ENSG00000163563	0.00106179	-1.52208	AT-specific
CGAS	ENSG00000164430	1.77e-06	-1.52209	AT-specific
CD79A	ENSG00000105369	0.00019832	-1.53	AT-specific
LINC02528	ENSG00000226004	0.00217243	-1.53527	AT-specific
ENSG00000291032	ENSG00000291032	0.00099381	-1.54405	AT-specific
ATP10A	ENSG00000206190	0.00047914	-1.54459	AT-specific
DUSP6	ENSG00000139318	2.95e-09	-1.55392	AT-specific
FAM72A	ENSG00000196550	1.87e-05	-1.55675	AT-specific
P2RY6	ENSG00000171631	5.08e-05	-1.56333	AT-specific
PLAAT4	ENSG00000133321	0.00027013	-1.56714	AT-specific
TLR3	ENSG00000164342	0.00068359	-1.57373	AT-specific
OVCH1-AS1	ENSG00000257599	0.00329822	-1.57429	AT-specific
ENSG00000261759	ENSG00000261759	0.00088631	-1.57579	AT-specific
TOR1B	ENSG00000136816	7.94e-05	-1.5782	AT-specific
NPIPA5	ENSG00000183793	0.00413666	-1.58593	AT-specific
ENSG00000273124	ENSG00000273124	0.00736006	-1.59185	AT-specific
LAP3	ENSG00000002549	7.86e-05	-1.59489	AT-specific
DSTNP2	ENSG00000248593	0.00245017	-1.61386	AT-specific
MRC1	ENSG00000260314	1.8e-07	-1.61787	AT-specific
CCR1	ENSG00000163823	1.5e-06	-1.62032	AT-specific
SRGAP2C	ENSG00000171943	7.05e-06	-1.62335	AT-specific
DTX2P1	ENSG00000186704	0.00014338	-1.62717	AT-specific
CD14	ENSG00000170458	0.00051834	-1.63343	AT-specific
TGFBI	ENSG00000120708	0.0002167	-1.63864	AT-specific
ADM	ENSG00000148926	1.84e-05	-1.63877	AT-specific
APOBEC3B	ENSG00000179750	0.00019033	-1.64037	AT-specific
STAT2	ENSG00000170581	2.7e-05	-1.641	AT-specific
SELL	ENSG00000188404	9.58e-05	-1.64659	AT-specific
IL1RN	ENSG00000136689	0.00352606	-1.64886	AT-specific
CASP1	ENSG00000137752	7.34e-05	-1.64887	AT-specific
CSF2RB	ENSG00000100368	5.49e-09	-1.65334	AT-specific
TAP2	ENSG00000204267	7.84e-06	-1.65502	AT-specific
CCND1	ENSG00000110092	0.00098648	-1.65674	AT-specific
GPR141	ENSG00000187037	0.00553065	-1.65985	AT-specific
DYSF	ENSG00000135636	9.17e-06	-1.66021	AT-specific
ENSG00000225886	ENSG00000225886	9.27e-05	-1.66171	AT-specific
LAMP3	ENSG00000078081	3.78e-05	-1.66429	AT-specific
SHOX2	ENSG00000168779	9.1e-08	-1.67221	AT-specific
SEMA4D	ENSG00000187764	4.15e-07	-1.68176	AT-specific
LINC01954	ENSG00000271952	0.00026157	-1.69491	AT-specific
VAMP5	ENSG00000168899	0.00046769	-1.69873	AT-specific
PPM1K	ENSG00000163644	9.98e-06	-1.70231	AT-specific
CHKB-CPT1B	ENSG00000254413	3.67e-05	-1.70235	AT-specific
GBP2	ENSG00000162645	0.00017081	-1.7059	AT-specific
APOL1	ENSG00000100342	9.48e-06	-1.70612	AT-specific
PSMB9	ENSG00000240065	6.45e-05	-1.70776	AT-specific
IL4I1	ENSG00000104951	2.84e-05	-1.70829	AT-specific
IGF2BP3	ENSG00000136231	1.63e-05	-1.70953	AT-specific
GIMAP7	ENSG00000179144	5.62e-05	-1.71267	AT-specific
C1RL	ENSG00000139178	5.16e-07	-1.74199	AT-specific
SECTM1	ENSG00000141574	0.00047411	-1.74398	AT-specific
KITLG	ENSG00000049130	3.02e-05	-1.74444	AT-specific
TNFSF13B	ENSG00000102524	0.00016219	-1.75128	AT-specific
APOBEC3G	ENSG00000239713	1.73e-05	-1.7567	AT-specific
SNX7	ENSG00000162627	0.00031597	-1.76191	AT-specific
NDRG2	ENSG00000165795	0.00057928	-1.76314	AT-specific
ZNF702P	ENSG00000242779	3.82e-05	-1.77324	AT-specific
C1R	ENSG00000159403	1.09e-05	-1.77484	AT-specific
TLR2	ENSG00000137462	5.9e-07	-1.77742	AT-specific
SASH1	ENSG00000111961	2.15e-05	-1.78453	AT-specific
CCL4	ENSG00000275302	0.00013077	-1.79569	AT-specific
HSH2D	ENSG00000196684	0.0011614	-1.80627	AT-specific
CD209	ENSG00000090659	2.38e-08	-1.81027	AT-specific
GIMAP8	ENSG00000171115	6.95e-06	-1.82116	AT-specific
PML	ENSG00000140464	5.44e-06	-1.82741	AT-specific
CD163	ENSG00000177575	0.00019219	-1.84763	AT-specific
SPP1	ENSG00000118785	0.00028278	-1.84863	AT-specific
ENPP2	ENSG00000136960	1.75e-06	-1.85739	AT-specific
SDS	ENSG00000135094	0.00090589	-1.86065	AT-specific
APOL6	ENSG00000221963	1.92e-06	-1.86066	AT-specific
FGL2	ENSG00000127951	4.48e-05	-1.86866	AT-specific
SP140	ENSG00000079263	9.16e-05	-1.8698	AT-specific
NAIPP3	ENSG00000248477	9.36e-05	-1.88206	AT-specific
NAIPP1	ENSG00000250687	9.36e-05	-1.88206	AT-specific
SCG5	ENSG00000166922	9.53e-06	-1.88353	AT-specific
DNAJC19P9	ENSG00000258608	0.00099381	-1.89253	AT-specific
IL3RA	ENSG00000185291	9.44e-06	-1.89376	AT-specific
NA	ENSG00000185291.12_PAR_Y	9.44e-06	-1.89376	AT-specific
ENSG00000291221	ENSG00000291221	5.56e-05	-1.90655	AT-specific
IL6	ENSG00000136244	0.00010485	-1.93019	AT-specific
TNFAIP6	ENSG00000123610	1.14e-05	-1.94309	AT-specific
HS3ST3B1	ENSG00000125430	4.36e-09	-1.94807	AT-specific
IRF7	ENSG00000185507	6.49e-05	-1.94896	AT-specific
MT1X	ENSG00000187193	1.4e-05	-1.95599	AT-specific
ENSG00000280852	ENSG00000280852	0.00376906	-1.95764	AT-specific
PARP14	ENSG00000173193	3.21e-05	-1.97	AT-specific
IFI6	ENSG00000126709	2.18e-05	-1.99077	AT-specific
LINC01138	ENSG00000274020	8e-05	-1.9956	AT-specific
HSPA7	ENSG00000225217	0.00017594	-1.99903	AT-specific
HAPLN3	ENSG00000140511	5.53e-07	-2.0005	AT-specific
DHX58	ENSG00000108771	2.47e-05	-2.00608	AT-specific
B3GNT7	ENSG00000156966	2.09e-06	-2.00693	AT-specific
MMP1	ENSG00000196611	0.00038677	-2.01177	AT-specific
DDX60	ENSG00000137628	2.53e-05	-2.0171	AT-specific
SLC8A1	ENSG00000183023	2.95e-09	-2.02306	AT-specific
IFI35	ENSG00000068079	3.09e-05	-2.02623	AT-specific
IL15RA	ENSG00000134470	4.02e-07	-2.03529	AT-specific
RNF213	ENSG00000173821	5.04e-06	-2.05069	AT-specific
OLFML2B	ENSG00000162745	0.00069999	-2.0543	AT-specific
IFIT5	ENSG00000152778	4.63e-05	-2.06378	AT-specific
CLDN23	ENSG00000253958	1.17e-06	-2.06722	AT-specific
SCIN	ENSG00000006747	5.27e-07	-2.06777	AT-specific
LILRB5	ENSG00000105609	1.05e-07	-2.07721	AT-specific
APOL3	ENSG00000128284	3.57e-05	-2.09034	AT-specific
STAP1	ENSG00000035720	0.00459232	-2.10997	AT-specific
RTP4	ENSG00000136514	1.71e-05	-2.11061	AT-specific
TRIM22	ENSG00000132274	0.0003542	-2.12037	AT-specific
HERC6	ENSG00000138642	8.48e-05	-2.12081	AT-specific
ZBP1	ENSG00000124256	0.00072704	-2.12429	AT-specific
EIF2AK2	ENSG00000055332	9.74e-05	-2.12883	AT-specific
SP110	ENSG00000135899	9.48e-05	-2.14358	AT-specific
PNPT1	ENSG00000138035	9.84e-05	-2.15645	AT-specific
SCIMP	ENSG00000161929	2.67e-06	-2.17805	AT-specific
MMP12	ENSG00000262406	0.00076873	-2.18552	AT-specific
AIM2	ENSG00000163568	3.91e-05	-2.19343	AT-specific
LY6E	ENSG00000160932	2.99e-06	-2.20153	AT-specific
ENSG00000291077	ENSG00000291077	2.29e-05	-2.20617	AT-specific
C1S	ENSG00000182326	1.08e-07	-2.20962	AT-specific
SLC39A8	ENSG00000138821	2.95e-09	-2.21538	AT-specific
PARP9	ENSG00000138496	5.16e-05	-2.23026	AT-specific
NEXN	ENSG00000162614	0.00023384	-2.24842	AT-specific
FOLR2	ENSG00000165457	5.01e-07	-2.26577	AT-specific
STAT1	ENSG00000115415	9.48e-06	-2.27462	AT-specific
SERPING1	ENSG00000149131	4.88e-07	-2.30524	AT-specific
CCL2	ENSG00000108691	6.97e-05	-2.3124	AT-specific
PROCR	ENSG00000101000	2.7e-07	-2.31676	AT-specific
MT1F	ENSG00000198417	5.04e-06	-2.37905	AT-specific
IFIH1	ENSG00000115267	2.15e-05	-2.37943	AT-specific
IL1R2	ENSG00000115590	3.04e-09	-2.38332	AT-specific
SAMSN1	ENSG00000155307	1.77e-07	-2.39172	AT-specific
SIGLEC14	ENSG00000254415	0.00094168	-2.39713	AT-specific
CCL15	ENSG00000275718	1.04e-07	-2.40123	AT-specific
DDX60L	ENSG00000181381	2.8e-07	-2.40374	AT-specific
PLSCR1	ENSG00000188313	2.88e-05	-2.43415	AT-specific
HLA-DRB6	ENSG00000229391	0.00777943	-2.43772	AT-specific
IGFBP4	ENSG00000141753	4.81e-05	-2.44694	AT-specific
CD80	ENSG00000121594	2.89e-08	-2.44901	AT-specific
MTCO1P12	ENSG00000237973	0.00095776	-2.47678	AT-specific
GIMAP5	ENSG00000196329	2.08e-05	-2.49063	AT-specific
JUP	ENSG00000173801	2.06e-05	-2.52808	AT-specific
CCL5	ENSG00000271503	5.58e-06	-2.55159	AT-specific
SAMD9L	ENSG00000177409	2.83e-05	-2.55373	AT-specific
PDGFRL	ENSG00000104213	2.63e-06	-2.55431	AT-specific
GMPR	ENSG00000137198	7.69e-05	-2.57598	AT-specific
CXCL1	ENSG00000163739	8.83e-06	-2.5859	AT-specific
FN1	ENSG00000115414	0.00098179	-2.59105	AT-specific
NEURL3	ENSG00000163121	2.07e-06	-2.59774	AT-specific
HELZ2	ENSG00000130589	6.83e-05	-2.61099	AT-specific
IFITM2	ENSG00000185201	0.0005123	-2.61645	AT-specific
OAS1	ENSG00000089127	3.3e-05	-2.63968	AT-specific
CLEC5A	ENSG00000258227	2.55e-07	-2.64848	AT-specific
CXCL9	ENSG00000138755	7.29e-05	-2.67695	AT-specific
ENSG00000276664	ENSG00000276664	0.00318064	-2.68423	AT-specific
MT1M	ENSG00000205364	2.84e-05	-2.68817	AT-specific
HESX1	ENSG00000163666	0.00030897	-2.69178	AT-specific
ETV7	ENSG00000010030	1.86e-05	-2.7005	AT-specific
GIMAP6	ENSG00000133561	0.00014791	-2.70876	AT-specific
SAMD9	ENSG00000205413	2.98e-05	-2.78606	AT-specific
GCH1	ENSG00000131979	5.15e-06	-2.7892	AT-specific
HPSE	ENSG00000173083	4.33e-05	-2.81833	AT-specific
CCL7	ENSG00000108688	7.93e-05	-2.82325	AT-specific
CD38	ENSG00000004468	2.35e-05	-2.8858	AT-specific
RIGI	ENSG00000107201	9.84e-05	-2.89563	AT-specific
IFI44	ENSG00000137965	0.00010489	-2.89869	AT-specific
NT5C3A	ENSG00000122643	8.13e-05	-2.91887	AT-specific
GBP1	ENSG00000117228	1.09e-05	-2.92979	AT-specific
MT1E	ENSG00000169715	2.89e-08	-2.94513	AT-specific
CCL24	ENSG00000106178	1.09e-05	-2.95155	AT-specific
IL7R	ENSG00000168685	2.4e-06	-2.99025	AT-specific
OAS2	ENSG00000111335	6.95e-05	-2.99995	AT-specific
BATF2	ENSG00000168062	9.66e-06	-3.02726	AT-specific
TTC39B	ENSG00000155158	1.08e-05	-3.07144	AT-specific
MT2A	ENSG00000125148	6.72e-10	-3.17258	AT-specific
IFITM3	ENSG00000142089	5.08e-05	-3.2138	AT-specific
OAS3	ENSG00000111331	6.66e-05	-3.3031	AT-specific
OASL	ENSG00000135114	0.00018362	-3.31844	AT-specific
CCL18	ENSG00000275385	2.36e-09	-3.35006	AT-specific
CDC42EP1	ENSG00000128283	7.29e-06	-3.37891	AT-specific
IDO1	ENSG00000131203	0.00032261	-3.38455	AT-specific
HERC5	ENSG00000138646	8.63e-05	-3.38563	AT-specific
USP18	ENSG00000184979	9.85e-05	-3.46495	AT-specific
MT1G	ENSG00000125144	2.16e-05	-3.48757	AT-specific
XAF1	ENSG00000132530	1.18e-05	-3.49602	AT-specific
MX2	ENSG00000183486	5.46e-05	-3.49978	AT-specific
EPSTI1	ENSG00000133106	9.44e-06	-3.52167	AT-specific
CMPK2	ENSG00000134326	8.49e-06	-3.52257	AT-specific
IFIT3	ENSG00000119917	6.21e-05	-3.58043	AT-specific
ISG15	ENSG00000187608	3.91e-05	-3.58163	AT-specific
SIGLEC1	ENSG00000088827	5.97e-06	-3.5906	AT-specific
MT1H	ENSG00000205358	0.00034446	-3.59154	AT-specific
GBP4	ENSG00000162654	1.02e-05	-3.62469	AT-specific
CCL13	ENSG00000181374	5.07e-05	-3.65194	AT-specific
ISG20	ENSG00000172183	3.66e-05	-3.67419	AT-specific
ENSG00000276345	ENSG00000276345	2.37e-05	-3.70615	AT-specific
GBP5	ENSG00000154451	3.33e-06	-3.74251	AT-specific
CALHM6	ENSG00000188820	2.89e-08	-3.78792	AT-specific
CXCL5	ENSG00000163735	2.63e-06	-3.89573	AT-specific
MX1	ENSG00000157601	0.0002272	-3.98938	AT-specific
CXCL11	ENSG00000169248	3.44e-06	-4.00317	AT-specific
IFI27	ENSG00000165949	0.00014389	-4.03032	AT-specific
APOBEC3A	ENSG00000128383	5.66e-05	-4.22796	AT-specific
RSAD2	ENSG00000134321	5.23e-06	-4.28916	AT-specific
IFITM1	ENSG00000185885	3.95e-05	-4.30617	AT-specific
IFIT1	ENSG00000185745	8.86e-05	-4.48704	AT-specific
IFIT2	ENSG00000119922	3.07e-05	-4.48815	AT-specific
TNFSF10	ENSG00000121858	1.33e-05	-4.6326	AT-specific
IFI44L	ENSG00000137959	4.43e-05	-4.65984	AT-specific
LGALS2	ENSG00000100079	1.35e-05	-4.85262	AT-specific
CCL8	ENSG00000108700	1.46e-05	-5.29242	AT-specific
CXCL10	ENSG00000169245	6.58e-06	-5.87713	AT-specific
IL7R	ENSG00000168685	0.00506548	1.73368	g2g-L2-specific
HSD11B1	ENSG00000117594	0.00135731	1.57313	g2g-L2-specific
CXCL5	ENSG00000163735	0.00037329	1.57267	g2g-L2-specific
CCL24	ENSG00000106178	0.00105236	1.50425	g2g-L2-specific
MT1H	ENSG00000205358	0.00246393	1.4573	g2g-L2-specific
CCL15	ENSG00000275718	0.00132013	1.38516	g2g-L2-specific
G0S2	ENSG00000123689	0.00063837	1.3804	g2g-L2-specific
COLEC12	ENSG00000158270	3.45e-06	1.29119	g2g-L2-specific
INHBA	ENSG00000122641	0.00307153	1.26428	g2g-L2-specific
MT1G	ENSG00000125144	0.00368949	1.22638	g2g-L2-specific
CLEC5A	ENSG00000258227	2e-05	1.16758	g2g-L2-specific
CCL18	ENSG00000275385	0.00010842	1.12779	g2g-L2-specific
MRC1	ENSG00000260314	7.28e-06	1.12224	g2g-L2-specific
CRIM1	ENSG00000150938	4.85e-05	1.07501	g2g-L2-specific
ENSG00000289530	ENSG00000289530	0.00658551	1.06128	g2g-L2-specific
SLC5A3	ENSG00000198743	2.74e-05	1.03622	g2g-L2-specific
CLEC4A	ENSG00000111729	5.45e-05	1.02898	g2g-L2-specific
SLC7A11	ENSG00000151012	0.0001045	1.01729	g2g-L2-specific
CISH	ENSG00000114737	0.00072946	0.974218	g2g-L2-specific
TNIP3	ENSG00000050730	0.00766297	0.97115	g2g-L2-specific
SGPP2	ENSG00000163082	0.00071727	0.969415	g2g-L2-specific
NPIPB13	ENSG00000198064	0.00043889	0.968135	g2g-L2-specific
IL3RA	ENSG00000185291	0.00848554	0.936338	g2g-L2-specific
NA	ENSG00000185291.12_PAR_Y	0.00848554	0.936338	g2g-L2-specific
CHST2	ENSG00000175040	0.00027925	0.934876	g2g-L2-specific
EBI3	ENSG00000105246	0.00198296	0.918727	g2g-L2-specific
TNFSF15	ENSG00000181634	0.00027614	0.916929	g2g-L2-specific
AFDN	ENSG00000130396	9.92e-05	0.908418	g2g-L2-specific
CLEC6A	ENSG00000205846	0.0001342	0.898209	g2g-L2-specific
LINC00937	ENSG00000226091	0.00767858	0.881403	g2g-L2-specific
NPIPA5	ENSG00000183793	0.00676995	0.864176	g2g-L2-specific
SEMA3A	ENSG00000075213	7.7e-05	0.856945	g2g-L2-specific
MOB3B	ENSG00000120162	0.00033842	0.851126	g2g-L2-specific
BHLHE41	ENSG00000123095	0.00017429	0.83477	g2g-L2-specific
SPRED1	ENSG00000166068	6.38e-06	0.829517	g2g-L2-specific
CLEC4E	ENSG00000166523	0.00492133	0.8244	g2g-L2-specific
ENSG00000290385	ENSG00000290385	0.00369504	0.823565	g2g-L2-specific
SLC39A8	ENSG00000138821	5.48e-05	0.818818	g2g-L2-specific
PRH1	ENSG00000231887	0.00887467	0.81752	g2g-L2-specific
PLAU	ENSG00000122861	2.36e-05	0.816218	g2g-L2-specific
VNN1	ENSG00000112299	8.67e-05	0.808308	g2g-L2-specific
SLC25A40	ENSG00000075303	5.57e-05	0.801835	g2g-L2-specific
ENSG00000260772	ENSG00000260772	0.00367251	0.800337	g2g-L2-specific
PRKAG2-AS2	ENSG00000242048	0.00191747	0.798288	g2g-L2-specific
FMNL1-DT	ENSG00000267121	0.00017302	0.789234	g2g-L2-specific
HIP1	ENSG00000127946	1.4e-05	0.78568	g2g-L2-specific
STAC	ENSG00000144681	0.00677445	0.777613	g2g-L2-specific
TNFRSF4	ENSG00000186827	0.00854113	0.775166	g2g-L2-specific
TGFA	ENSG00000163235	0.00111888	0.774555	g2g-L2-specific
NPIPA2	ENSG00000254852	0.00830845	0.765998	g2g-L2-specific
TM4SF1	ENSG00000169908	0.00560868	0.765994	g2g-L2-specific
MRNIP	ENSG00000161010	2e-05	0.762694	g2g-L2-specific
JAKMIP2	ENSG00000176049	1.31e-05	0.757625	g2g-L2-specific
CLEC12A	ENSG00000172322	0.00045821	0.747059	g2g-L2-specific
KSR1	ENSG00000141068	0.00098836	0.745201	g2g-L2-specific
ENSG00000266490	ENSG00000266490	0.00056243	0.744429	g2g-L2-specific
KLF5	ENSG00000102554	0.00012399	0.740676	g2g-L2-specific
AKR1C3	ENSG00000196139	0.00030095	0.740538	g2g-L2-specific
ACO1	ENSG00000122729	1.87e-05	0.732039	g2g-L2-specific
SYT1	ENSG00000067715	0.00038249	0.72581	g2g-L2-specific
ZFYVE16	ENSG00000039319	3.38e-05	0.720862	g2g-L2-specific
RBPJ	ENSG00000168214	4.35e-05	0.709821	g2g-L2-specific
LPAR1	ENSG00000198121	0.00017302	0.708385	g2g-L2-specific
CCL20	ENSG00000115009	0.00550492	0.700646	g2g-L2-specific
LINC02828	ENSG00000224164	0.00671962	-0.700786	non-g2g-L2-specific
GBP2	ENSG00000162645	0.00506811	-0.702118	non-g2g-L2-specific
PML	ENSG00000140464	0.00440629	-0.702162	non-g2g-L2-specific
MNDA	ENSG00000163563	0.00349215	-0.720638	non-g2g-L2-specific
ARHGAP27	ENSG00000159314	0.00022664	-0.720704	non-g2g-L2-specific
APOBEC3G	ENSG00000239713	0.00548623	-0.721349	non-g2g-L2-specific
USP30-AS1	ENSG00000256262	0.00093484	-0.723456	non-g2g-L2-specific
APOBEC3F	ENSG00000128394	0.00381116	-0.724783	non-g2g-L2-specific
ASCL2	ENSG00000183734	0.0011838	-0.740517	non-g2g-L2-specific
BST2	ENSG00000130303	0.00056192	-0.742012	non-g2g-L2-specific
LILRA5	ENSG00000187116	0.00082785	-0.742315	non-g2g-L2-specific
FGD2	ENSG00000146192	0.00209333	-0.761344	non-g2g-L2-specific
LGALS3BP	ENSG00000108679	0.00183319	-0.788201	non-g2g-L2-specific
TMEM37	ENSG00000171227	0.00487911	-0.791538	non-g2g-L2-specific
PSMB9	ENSG00000240065	0.00735702	-0.817711	non-g2g-L2-specific
BSCL2	ENSG00000168000	0.00056589	-0.821953	non-g2g-L2-specific
UBE2L6	ENSG00000156587	0.00088847	-0.82473	non-g2g-L2-specific
IFIH1	ENSG00000115267	0.00529145	-0.833264	non-g2g-L2-specific
IFIT5	ENSG00000152778	0.00251024	-0.860363	non-g2g-L2-specific
SAMD9	ENSG00000205413	0.00806232	-0.883403	non-g2g-L2-specific
HAPLN3	ENSG00000140511	0.00296306	-0.915892	non-g2g-L2-specific
JUP	ENSG00000173801	0.00201789	-0.937217	non-g2g-L2-specific
PARP9	ENSG00000138496	0.00136524	-0.937405	non-g2g-L2-specific
SLC38A5	ENSG00000017483	0.00251024	-0.939326	non-g2g-L2-specific
CCL7	ENSG00000108688	0.00386083	-0.942356	non-g2g-L2-specific
ATP10A	ENSG00000206190	0.00159564	-0.943431	non-g2g-L2-specific
HERC6	ENSG00000138642	0.00391825	-0.948718	non-g2g-L2-specific
HES4	ENSG00000188290	0.00103455	-0.956406	non-g2g-L2-specific
CFB	ENSG00000243649	0.00155398	-0.963412	non-g2g-L2-specific
ENSG00000289754	ENSG00000289754	0.00014835	-0.971373	non-g2g-L2-specific
GCH1	ENSG00000131979	0.0080285	-0.97142	non-g2g-L2-specific
SP140	ENSG00000079263	0.00155903	-0.976235	non-g2g-L2-specific
SDS	ENSG00000135094	0.0001327	-0.977302	non-g2g-L2-specific
IL15RA	ENSG00000134470	0.00290094	-0.979986	non-g2g-L2-specific
TRIM5	ENSG00000132256	0.00064512	-0.990924	non-g2g-L2-specific
DHX58	ENSG00000108771	0.00193644	-1.00575	non-g2g-L2-specific
RTP4	ENSG00000136514	0.00306039	-1.03313	non-g2g-L2-specific
SERPING1	ENSG00000149131	0.00238433	-1.04232	non-g2g-L2-specific
ENSG00000291077	ENSG00000291077	0.00128257	-1.05105	non-g2g-L2-specific
CD38	ENSG00000004468	0.00805633	-1.07725	non-g2g-L2-specific
SP110	ENSG00000135899	0.00071744	-1.08217	non-g2g-L2-specific
PLSCR1	ENSG00000188313	0.00098836	-1.08526	non-g2g-L2-specific
IFI6	ENSG00000126709	0.00118744	-1.09279	non-g2g-L2-specific
HELZ2	ENSG00000130589	0.00360414	-1.12484	non-g2g-L2-specific
IGFBP4	ENSG00000141753	0.00023346	-1.13168	non-g2g-L2-specific
IRF7	ENSG00000185507	0.0007947	-1.1393	non-g2g-L2-specific
HSH2D	ENSG00000196684	0.00186632	-1.17049	non-g2g-L2-specific
IFI35	ENSG00000068079	0.0007947	-1.17601	non-g2g-L2-specific
PDGFRL	ENSG00000104213	0.00086346	-1.17686	non-g2g-L2-specific
NUPR1	ENSG00000176046	1.87e-05	-1.18358	non-g2g-L2-specific
NEURL3	ENSG00000163121	0.00035089	-1.19759	non-g2g-L2-specific
BATF2	ENSG00000168062	0.00312173	-1.20262	non-g2g-L2-specific
XAF1	ENSG00000132530	0.00701041	-1.20874	non-g2g-L2-specific
RIGI	ENSG00000107201	0.00245707	-1.23551	non-g2g-L2-specific
LY6E	ENSG00000160932	0.00106307	-1.24408	non-g2g-L2-specific
ZBP1	ENSG00000124256	0.00172623	-1.25568	non-g2g-L2-specific
RN7SL2	ENSG00000274012	0.00752835	-1.30853	non-g2g-L2-specific
NT5C3A	ENSG00000122643	0.00334946	-1.35614	non-g2g-L2-specific
GBP1	ENSG00000117228	0.00275427	-1.36641	non-g2g-L2-specific
IFITM2	ENSG00000185201	0.00041091	-1.37004	non-g2g-L2-specific
OAS2	ENSG00000111335	0.00392025	-1.37855	non-g2g-L2-specific
IFI44	ENSG00000137965	0.00187529	-1.3844	non-g2g-L2-specific
SIGLEC1	ENSG00000088827	0.00175627	-1.40221	non-g2g-L2-specific
TRIM22	ENSG00000132274	0.00022359	-1.43514	non-g2g-L2-specific
ETV7	ENSG00000010030	0.00127103	-1.44787	non-g2g-L2-specific
CMPK2	ENSG00000134326	0.00466291	-1.4617	non-g2g-L2-specific
OAS3	ENSG00000111331	0.00207797	-1.48961	non-g2g-L2-specific
OAS1	ENSG00000089127	0.00049472	-1.50868	non-g2g-L2-specific
GMPR	ENSG00000137198	0.00083574	-1.51046	non-g2g-L2-specific
GBP4	ENSG00000162654	0.00420944	-1.52337	non-g2g-L2-specific
EPSTI1	ENSG00000133106	0.00291013	-1.53477	non-g2g-L2-specific
SECTM1	ENSG00000141574	0.00015034	-1.53759	non-g2g-L2-specific
AXL	ENSG00000167601	0.00011396	-1.54811	non-g2g-L2-specific
IDO1	ENSG00000131203	0.00699031	-1.55979	non-g2g-L2-specific
GBP5	ENSG00000154451	0.00237556	-1.56987	non-g2g-L2-specific
HERC5	ENSG00000138646	0.00121115	-1.65251	non-g2g-L2-specific
HESX1	ENSG00000163666	0.00139445	-1.67219	non-g2g-L2-specific
MX2	ENSG00000183486	0.00122535	-1.71944	non-g2g-L2-specific
IFIT3	ENSG00000119917	0.00139445	-1.85441	non-g2g-L2-specific
IFITM3	ENSG00000142089	0.00015194	-1.86215	non-g2g-L2-specific
CXCL11	ENSG00000169248	0.001007	-1.86604	non-g2g-L2-specific
USP18	ENSG00000184979	0.00126028	-1.91309	non-g2g-L2-specific
MX1	ENSG00000157601	0.00162053	-1.93983	non-g2g-L2-specific
IFI44L	ENSG00000137959	0.00235619	-2.03135	non-g2g-L2-specific
APOBEC3A	ENSG00000128383	0.00277251	-2.10301	non-g2g-L2-specific
CCL8	ENSG00000108700	0.00439514	-2.13361	non-g2g-L2-specific
ENSG00000285025	ENSG00000285025	0.00514052	-2.15055	non-g2g-L2-specific
RSAD2	ENSG00000134321	0.00116482	-2.17818	non-g2g-L2-specific
IFIT2	ENSG00000119922	0.00193325	-2.20027	non-g2g-L2-specific
OASL	ENSG00000135114	0.00026153	-2.22545	non-g2g-L2-specific
ISG20	ENSG00000172183	0.00019866	-2.24585	non-g2g-L2-specific
ISG15	ENSG00000187608	0.00028572	-2.26667	non-g2g-L2-specific
ENSG00000273730	ENSG00000273730	0.00740881	-2.28874	non-g2g-L2-specific
RNA5-8SN5	ENSG00000274917	0.00740881	-2.28874	non-g2g-L2-specific
RNA5-8SN3	ENSG00000275215	0.00740881	-2.28874	non-g2g-L2-specific
ENSG00000275757	ENSG00000275757	0.00740881	-2.28874	non-g2g-L2-specific
RNA5-8SN4	ENSG00000276700	0.00740881	-2.28874	non-g2g-L2-specific
ENSG00000277739	ENSG00000277739	0.00740881	-2.28874	non-g2g-L2-specific
RNA5-8SN1	ENSG00000278189	0.00740881	-2.28874	non-g2g-L2-specific
RNA5-8SN2	ENSG00000278233	0.00740881	-2.28874	non-g2g-L2-specific
TNFSF10	ENSG00000121858	0.00057206	-2.31781	non-g2g-L2-specific
IFIT1	ENSG00000185745	0.00096949	-2.38448	non-g2g-L2-specific
IFI27	ENSG00000165949	0.00071744	-2.41133	non-g2g-L2-specific
SNORD3D	ENSG00000281000	0.00287905	-2.44011	non-g2g-L2-specific
IFITM1	ENSG00000185885	0.00102878	-2.63774	non-g2g-L2-specific
CXCL10	ENSG00000169245	0.00165707	-2.87872	non-g2g-L2-specific
RNU4-2	ENSG00000202538	0.00332303	-2.99049	non-g2g-L2-specific
RNA5S12	ENSG00000199270	0.00338638	-3.4267	non-g2g-L2-specific
RNA5S11	ENSG00000199334	0.00338638	-3.4267	non-g2g-L2-specific
RNA5S3	ENSG00000199337	0.00338638	-3.4267	non-g2g-L2-specific
RNA5S1	ENSG00000199352	0.00338638	-3.4267	non-g2g-L2-specific
RNA5S5	ENSG00000199396	0.00338638	-3.4267	non-g2g-L2-specific
RNA5S10	ENSG00000199910	0.00338638	-3.4267	non-g2g-L2-specific
RNA5S8	ENSG00000200343	0.00338638	-3.4267	non-g2g-L2-specific
RNA5S17	ENSG00000200370	0.00338638	-3.4267	non-g2g-L2-specific
RNA5S4	ENSG00000200381	0.00338638	-3.4267	non-g2g-L2-specific
RNA5S6	ENSG00000200624	0.00338638	-3.4267	non-g2g-L2-specific
RNA5S14	ENSG00000201355	0.00338638	-3.4267	non-g2g-L2-specific
RNA5S2	ENSG00000201588	0.00338638	-3.4267	non-g2g-L2-specific
RNA5S15	ENSG00000201925	0.00338638	-3.4267	non-g2g-L2-specific
RNA5S16	ENSG00000202257	0.00338638	-3.4267	non-g2g-L2-specific
RNA5S7	ENSG00000202521	0.00338638	-3.4267	non-g2g-L2-specific
RNA5S13	ENSG00000202526	0.00338638	-3.4267	non-g2g-L2-specific

## Sheet: ST8_TypeI_IFN_genes
Supplementary Data 8. A list of Type I IFN genes used in Figure 3e.
Gene name
ISG15
MX1
MX2
IFIT1
IRF1
IRF7
PSMB8
STAT1
SOCS1
USP18

## Sheet: ST9_lipid_stats
Supplementary Data 9. Statistics of whole cell lipidomic analysis from three g2g-L2 and eight non-g2g-L2 strains. The first column (id) shows unique ion peak identifiers assigned to mass spectrometry peaks based on a 10ppm match to the exact mass of a theoretical lipid. We calculated the median ion peak intensity of three replicates for each strain tested. We used the limma package in R to test f…
	Strain type
id	non-g2g-L2	g2g-L2	non-g2g-L2	non-g2g-L2	non-g2g-L2	g2g-L2	g2g-L2	non-g2g-L2	non-g2g-L2	non-g2g-L2	non-g2g-L2	log2-fold-change	adjusted p value (Benjamini-Hochberg)
mz_1554.1320	8.11978	5.09517	8.54422	7.91382	7.91728	5.83673	4.45217	7.80491	6.2929	7.51947	7.80086	2.61113	0.901489
mz_0621.4337	9.04049	12.5836	7.57956	9.01197	8.60768	11.6736	10.0592	8.9362	8.16692	8.36805	9.21639	-2.82287	0.901489
mz_1740.4671	8.17736	6.76078	12.1208	12.4582	8.20063	5.20939	4.56991	9.02	10.697	11.2977	12.3886	5.03167	0.901489
mz_2171.8853	8.62532	4.85639	8.30004	8.96832	8.98658	7.48181	6.12184	8.80265	8.68947	7.8696	8.73881	2.46925	0.901489
mz_1162.9642	7.86217	5.53773	7.26272	7.79584	7.85143	5.3221	6.34946	7.48323	9.11884	8.95661	8.58791	2.37841	0.901489
mz_1813.1102	7.5793	5.08262	5.7921	7.71619	7.16569	4.75705	5.39651	7.75	7.12366	7.22179	7.72474	2.18046	0.901489
mz_0608.2806	7.43652	8.55676	7.41126	5.91904	7.33631	9.11598	8.94949	6.57748	6.73047	6.87896	5.87373	-2.10361	0.901489
mz_1778.1986	8.56823	5.74833	8.39628	8.01617	8.63124	6.47949	6.45463	8.0105	7.10797	8.07408	8.7989	1.97294	0.901489
mz_1237.0690	6.49964	9.36599	7.20048	7.51373	6.24359	8.41445	9.78068	7.52856	7.68603	7.4264	6.5324	-2.10819	0.901489
mz_0853.3382	7.13683	9.56554	6.46285	5.05633	5.36536	10.7493	7.45309	6.17553	6.43014	7.06314	6.83164	-2.94076	0.901489
mz_0540.2662	13.5236	10.0903	13.6829	10.1235	12.2557	9.10356	9.4976	15.5188	13.5221	13.6108	15.0335	3.84504	0.901489
mz_0924.5315	5.30928	7.96832	6.50664	4.78213	5.12836	7.94671	8.28551	4.45022	7.05363	4.45442	6.26766	-2.5728	0.901489
mz_0907.6327	9.40935	7.30242	9.36485	10.3935	9.8155	7.12113	8.37995	10.2916	8.62684	10.355	9.45868	2.11325	0.901489
mz_2127.8966	7.40106	3.74379	6.71055	7.99779	7.93517	5.47761	6.24849	7.75379	6.95132	7.19603	7.55973	2.28155	0.901489
mz_0694.5028	7.99216	6.64028	8.39957	9.05687	7.81588	6.00525	5.80725	9.05641	7.35854	8.21902	7.59095	2.03525	0.901489
mz_0967.6046	13.8522	12.3428	14.354	12.7314	13.3983	8.71441	11.219	13.214	14.7108	14.6191	13.0146	2.97808	0.901489
mz_1173.7427	6.93755	5.06111	8.13921	8.1557	7.91329	4.35286	7.09474	7.44348	8.10992	8.116	7.78941	2.32267	0.901489
mz_2580.7428	9.91382	8.36944	10.1999	9.00532	8.88399	7.10277	8.08186	10.2404	10.0369	10.2468	10.3913	2.01344	0.923922
mz_0929.5361	7.27351	10.1322	7.75984	7.20396	7.12525	9.86693	8.19565	7.55476	7.31606	6.18709	7.96029	-2.10068	0.985976
mz_0892.6426	9.72519	7.94873	9.39979	9.96729	9.99614	8.50651	7.45402	9.15259	9.43017	9.35229	9.74849	1.62674	0.985976
mz_1569.1316	8.32255	7.11478	9.24087	9.14838	9.27963	6.86919	8.09367	9.08723	9.33289	9.41263	8.7432	1.71171	0.985976
mz_1220.8037	7.44312	6.12723	7.95398	7.66813	6.93572	6.23285	5.88238	7.97034	8.62932	7.63906	8.25779	1.73136	0.985976
mz_3045.5390	7.90772	6.37146	7.88063	8.4443	8.09814	5.30326	7.01002	8.8223	7.85905	9.03928	7.4239	1.95617	0.985976
mz_1111.6266	5.94018	10.5481	6.55291	7.28403	7.59646	9.80357	8.17417	7.40744	8.54251	6.32508	6.29623	-2.51551	0.985976
mz_0849.5217	9.33871	8.65161	9.7022	9.90503	8.87594	7.44674	7.00805	9.79587	9.17166	9.29391	10.0282	1.81181	0.985976
mz_0785.5338	13.4915	14.6094	13.0331	14.1391	13.6807	15.8465	15.4175	14.1396	13.4315	12.9346	12.4754	-1.87543	0.985976
mz_1597.1555	9.02403	11.3857	7.91641	7.94554	9.49764	11.6308	9.82695	7.22889	9.56432	7.91254	9.27625	-2.40213	0.985976
mz_0556.2129	7.06665	8.22549	6.54133	7.73015	6.5803	8.79994	8.77836	5.70746	7.28092	5.88859	6.8002	-1.90181	0.985976
mz_1915.0295	8.833	6.9842	8.67556	8.80081	9.21217	6.52723	8.19171	8.81159	8.84131	8.90117	8.90241	1.63787	0.985976
mz_2566.7999	10.0667	7.54194	10.3859	9.81833	9.12358	8.82553	8.60302	10.4634	10.003	10.1775	10.0484	1.68735	0.985976
mz_0940.6567	7.80765	5.64816	8.27988	8.83741	8.83626	5.46061	7.88834	8.14567	8.30125	8.54423	8.04155	2.01687	0.985976
mz_2202.5386	8.16129	6.54363	7.64442	7.83712	7.22256	5.53658	6.33282	8.0561	7.55113	7.86275	7.21641	1.55629	0.985976
mz_1120.8245	8.64572	5.30863	8.25371	7.94079	7.56055	6.17489	7.18109	8.72769	7.6278	7.41333	8.47698	1.85929	0.985976
mz_0788.4356	8.25022	10.694	8.51278	7.50525	7.87206	12.4633	8.50857	6.64141	7.39157	7.84115	4.68353	-3.21802	0.985976
mz_0823.5971	11.3919	10.6817	12.0193	10.9433	12.6536	9.67634	8.85673	12.2992	10.722	12.003	11.732	1.98229	0.985976
mz_0782.5541	11.5294	9.32051	10.6106	10.7978	10.813	9.3485	9.6113	11.0648	11.2504	10.3425	10.7456	1.4675	0.985976
mz_1649.1715	9.43863	12.1199	8.22639	8.31973	10.2561	10.9731	11.3086	10.5294	8.06936	8.21963	6.54929	-2.76612	0.985976
mz_1193.9199	8.79637	6.21914	8.58313	8.25521	8.64803	7.38003	6.15931	8.48872	7.47965	8.77654	7.56163	1.7375	0.985976
mz_0615.4384	8.98797	6.85392	9.31138	8.3787	9.21512	8.38702	5.62357	8.79855	8.63276	9.15492	8.73574	1.94705	0.985976
mz_2341.5053	8.08339	9.24339	7.90262	6.84563	8.3606	8.71605	10.1653	7.53496	6.94404	7.90144	7.10283	-1.79047	0.985976
mz_2474.6798	8.14504	9.00435	7.86666	8.83799	7.17786	10.4786	10.0909	8.7362	7.44213	8.26477	7.89512	-1.81223	0.985976
mz_2956.4660	7.1685	8.88456	6.35785	6.15425	6.92085	8.76191	8.41372	8.4113	6.34245	6.21953	7.02717	-1.86149	0.985976
mz_1411.9609	8.91029	5.07513	9.12654	8.90125	7.39663	7.37699	6.7393	8.42943	7.85506	7.98578	8.65364	2.01019	0.985976
mz_2175.3042	7.39515	7.34482	8.15196	8.38675	8.40946	6.35131	6.08437	8.42359	7.66543	8.67484	8.44519	1.60055	0.985976
mz_1761.1738	6.36797	6.68007	6.19541	7.69605	7.64777	2.47315	4.77113	8.40565	8.41987	7.45327	7.10533	2.76997	0.985976
mz_0650.5001	9.58071	7.61234	9.59659	8.24681	9.72554	7.57052	6.97265	8.9869	8.46952	9.60397	8.4312	1.69498	0.985976
mz_0924.4329	7.19058	9.07111	6.51286	6.85972	7.11809	12.7243	7.81909	8.01115	6.38621	6.99333	7.20529	-2.83686	0.985976
mz_0961.5870	7.30155	6.18912	9.5688	9.10557	9.66713	8.24352	6.09914	9.55977	9.0606	8.92668	8.76164	2.15004	0.985976
mz_1643.8123	7.0728	8.33594	6.35718	6.34605	7.54595	12.3445	8.45742	7.34475	8.14322	6.52177	6.57212	-2.72466	0.985976
mz_1774.1742	9.43683	6.10219	8.34486	7.75501	8.03645	7.27549	6.84786	9.29841	9.19454	10.2527	8.02974	2.05172	0.985976
mz_0960.5843	14.5956	12.8565	14.1703	12.7187	14.7463	11.768	11.6246	15.3743	13.0116	15.0487	14.2101	2.15144	0.985976
mz_1165.9305	13.1374	10.4466	10.3982	9.74602	12.0353	9.10513	7.41086	12.2934	13.1026	14.4521	12.7784	3.25541	0.985976
mz_1856.2948	6.40861	7.90504	6.78943	6.51664	6.65645	8.26277	8.13366	6.85929	5.54556	6.82071	7.22307	-1.49802	0.985976
mz_0900.5244	9.74307	6.54084	7.17293	6.90887	8.07364	6.77554	5.14967	8.51077	8.62534	8.70861	9.28536	2.22322	0.985976
mz_1757.2079	8.78574	6.98504	8.07489	8.7176	8.02448	5.52362	6.69105	7.33757	7.94138	8.28172	7.43707	1.67515	0.985976
mz_0977.6852	10.6844	10.0195	9.84548	9.94892	11.1939	8.39162	8.17756	11.355	11.635	11.782	10.4266	1.99603	0.985976
mz_2424.2379	7.25988	6.3596	8.01407	8.4167	7.83681	6.23093	6.94126	7.79161	8.42628	7.90024	7.7963	1.41964	0.985976
mz_1332.8738	9.229	9.89823	9.44659	8.65297	9.81293	12.1696	13.7007	8.92106	10.2561	10.0157	10.1273	-2.36515	0.985976
mz_1004.5870	7.98239	6.83123	7.59681	7.35317	10.057	5.37153	6.13592	8.41573	7.45526	8.10839	8.09216	2.01972	0.985976
mz_0573.3874	11.5811	12.5616	12.3683	10.7181	11.0028	12.7936	13.3977	10.6257	11.792	11.0434	11.2744	-1.61695	0.985976
mz_1134.6868	7.85484	6.25102	7.29809	8.67406	7.99999	6.95594	6.1921	8.14412	7.60052	7.96327	7.73568	1.44247	0.985976
mz_1018.7189	11.6726	10.1454	10.4395	9.99324	11.592	9.4092	9.14944	11.5583	12.05	11.7715	12.0335	1.82082	0.985976
mz_1684.4045	7.95478	5.47749	7.37795	7.84428	7.93583	7.20187	5.6261	7.38651	8.33108	8.26409	7.06839	1.66854	0.985976
mz_0902.5917	10.1643	8.47191	10.3126	9.77604	9.66759	8.16811	8.85256	10.2217	9.36694	9.43949	10.2152	1.39796	0.985976
mz_2192.8900	10.7743	10.9307	11.1945	10.7126	11.6085	8.94152	8.13555	11.7995	11.1313	11.2127	11.2761	1.87776	0.985976
mz_1017.7188	12.9685	11.7273	12.7606	12.5168	12.5693	11.226	10.7166	13.4196	12.5572	13.6367	11.9499	1.57403	0.985976
mz_2416.7182	7.79432	6.54708	8.66741	8.48728	8.63384	7.00395	7.17942	8.13536	8.25108	7.89583	8.16266	1.34333	0.985976
mz_2083.7965	7.55837	6.53199	6.88008	6.95981	6.93929	4.77984	5.27429	8.46716	6.96432	8.55924	6.94128	1.87999	0.985976
mz_0713.4211	7.47761	7.61873	7.76171	8.61838	7.66224	4.71422	4.78703	7.53439	8.56003	6.9204	8.43278	2.16428	0.985976
mz_1774.5182	10.9462	7.79693	11.3835	8.98409	8.85262	7.82916	6.88884	9.48314	9.0042	10.5562	8.59152	2.22023	0.985976
mz_1482.3778	10.1537	8.55391	10.783	10.7063	10.7802	9.54578	6.54105	9.35895	9.83583	10.4557	9.83577	2.02511	0.985976
mz_1742.4827	12.6914	7.40437	13.5132	12.9269	9.37509	8.6551	11.7411	13.7146	12.2228	12.6345	13.3417	3.28567	0.985976
mz_0865.3191	7.03019	10.2768	6.97574	6.64141	7.29825	7.58622	7.72704	5.85129	5.39172	5.16762	5.52373	-2.29503	0.985976
mz_1051.7302	9.25864	14.3286	8.86512	10.5414	11.9851	13.1259	10.879	9.6938	11.1411	9.72739	10.1305	-2.60994	0.985976
mz_2617.1736	8.62844	5.8868	8.47317	8.0844	8.06865	6.89939	6.53124	6.98031	7.51025	8.76659	7.89442	1.61163	0.985976
mz_1329.7095	7.39739	8.65946	7.45395	5.9796	7.44122	8.82959	8.93556	6.67255	6.41975	8.07478	7.6648	-1.6702	0.985976
mz_2158.5769	9.07609	4.33383	8.72056	7.73698	8.8025	7.88865	7.33134	9.2057	8.22249	9.29633	9.08917	2.25079	0.985976
mz_1409.2172	9.49816	4.64499	6.47938	7.95869	8.99301	6.41874	6.9928	8.85428	8.61528	7.40301	8.5309	2.27275	0.985976
mz_1427.7979	8.07709	9.66881	6.52672	6.75634	6.53512	12.0005	8.35766	8.12061	9.19856	7.26451	7.2299	-2.54537	0.985976
mz_1522.1320	6.6659	8.67254	6.49731	5.03576	6.64951	8.70428	8.41757	8.60235	6.79984	5.94408	6.26819	-2.04026	0.985976
mz_2807.7256	6.90142	5.70819	7.62692	8.04271	7.41262	4.89964	6.15092	7.03391	6.25002	6.72998	7.7331	1.63008	0.985976
mz_0674.4637	9.89848	8.15288	9.21051	8.68213	8.59335	6.64366	8.21206	11.225	9.61646	9.91233	10.0821	1.98302	0.985976
mz_2119.6438	7.86981	3.63019	7.09662	7.9392	6.99742	5.53114	6.6996	6.78565	6.86271	6.94476	7.3273	1.94096	0.985976
mz_0821.4786	7.15112	10.3777	5.71297	7.02466	8.51864	9.4017	8.63978	5.85829	7.14366	5.78299	8.94284	-2.45617	0.985976
mz_0829.2827	6.45152	9.37266	6.37688	8.07787	7.31944	9.6353	8.25381	5.72776	7.99843	4.26185	6.85893	-2.45317	0.985976
mz_0979.6939	6.80883	4.59007	4.83591	8.3328	7.74151	4.92936	5.73116	7.69188	8.41821	8.84835	7.36802	2.42216	0.985976
mz_1093.8519	6.67228	5.78448	7.12833	8.23452	7.26196	5.4763	5.38937	6.75277	7.74996	6.43615	6.61616	1.55647	0.985976
mz_0410.3754	8.46683	7.12799	8.37275	9.048	8.79923	7.27594	5.89048	7.77889	7.87485	8.07989	7.95169	1.53171	0.985976
mz_1643.2337	8.33025	4.67265	8.59537	8.29837	8.04268	6.01001	7.30098	7.08911	8.46786	6.76562	8.07789	1.96385	0.985976
mz_2841.0965	9.28821	7.94284	9.65138	9.26836	10.3875	9.0087	8.09791	9.51002	10.0395	10.786	10.6162	1.59357	0.985976
mz_1585.1348	9.18219	6.6976	8.87037	7.6443	9.77793	7.87233	5.8753	7.59755	9.39776	9.82453	8.48205	2.03201	0.985976
mz_1834.9195	6.85281	7.97052	7.10137	5.42749	7.7062	12.0648	8.27568	6.05116	5.68836	7.98154	6.85249	-2.72933	0.985976
mz_1604.2079	10.745	12.5184	10.1916	9.41043	10.8978	12.6313	11.8795	8.7224	11.4168	7.44754	10.4489	-2.43299	0.985976
mz_1733.9752	10.8343	8.19145	11.5946	10.4814	11.8032	8.87743	10.9063	12.3027	10.4553	11.2457	12.0238	2.01756	0.985976
mz_0881.5725	11.6576	9.3624	13.1758	12.5843	13.2798	12.396	10.5917	15.1673	13.3686	13.5376	12.5527	2.3821	0.985976
mz_0295.1516	9.61959	10.4208	10.3891	7.00706	8.74223	10.4802	10.9793	8.71812	7.39165	7.83755	7.72389	-2.19815	0.985976
mz_2846.4330	7.8972	6.65548	8.64108	7.86061	8.6875	7.29345	6.22435	8.57192	7.18579	8.33737	8.51534	1.48767	0.985976
mz_1661.7568	8.96064	5.35027	9.21674	8.4224	9.38653	7.96573	6.60768	8.62448	9.23077	6.95556	8.49107	2.0198	0.985976
mz_1488.2944	8.95046	8.33576	9.0311	11.0797	9.49512	6.50435	8.02977	9.31272	8.96965	11.7735	10.0234	2.20615	0.985976
mz_1052.7408	5.52431	9.14688	5.44929	8.55594	7.81557	10.013	9.38843	8.28781	8.30128	6.03427	6.98873	-2.39645	0.985976
mz_1226.2713	6.04681	10.5754	7.03375	6.3023	6.74753	8.72554	9.32444	6.64795	8.08767	9.70212	7.04461	-2.3402	0.985976
mz_0844.6637	9.42187	7.59681	8.11429	9.54758	8.41611	7.34114	7.85234	9.41766	9.22339	8.7599	9.29943	1.42826	0.985976
mz_1242.7404	8.74472	6.40872	8.75405	9.2252	8.26927	7.38762	7.4013	7.83158	7.93947	8.67499	8.54869	1.43262	0.985976
mz_0802.4512	5.61129	8.28229	7.02452	7.3519	8.25236	10.8658	8.61265	5.31164	7.80594	6.53992	7.48403	-2.33087	0.985976
mz_1306.8987	9.12162	9.14679	9.23548	8.92198	10.154	5.68186	7.64748	9.46967	9.97725	9.18182	9.69815	1.97795	0.985976
mz_0520.4572	8.5189	6.1871	7.19374	8.69048	7.3825	6.15365	6.58064	8.46684	8.42766	7.17132	7.24338	1.57972	0.985976
mz_0333.1908	9.80383	11.6442	9.12926	9.77807	9.12078	11.4707	9.86626	8.56847	9.03866	10.177	8.00536	-1.79105	0.985976
mz_0501.2976	9.86859	10.7479	11.7007	12.0857	10.1207	8.85989	8.39236	12.768	12.842	12.2097	11.8205	2.3436	0.985976
mz_1352.0612	8.5571	10.8017	8.57813	11.1425	10.4013	12.7754	11.0895	10.0244	8.95636	7.86886	8.654	-2.28272	0.985976
mz_0672.2028	9.29336	3.20376	7.40167	7.50118	10.727	5.64917	8.1344	10.6575	9.53494	7.30908	8.79108	3.23954	0.985976
mz_1454.0443	7.44227	9.32697	7.55512	6.64245	7.44203	11.6257	9.39467	6.44065	8.06574	10.1168	8.14107	-2.38502	0.985976
mz_1253.2948	7.89316	6.49615	5.9644	6.21011	7.48929	4.13275	3.76298	8.14715	6.03937	6.54845	7.99652	2.23876	0.985976
mz_1396.0276	6.87728	8.76471	8.48468	8.87721	6.80412	9.80459	9.44332	7.4821	7.63006	6.97192	7.96194	-1.70137	0.985976
mz_2400.7021	11.3205	11.1151	11.2462	12.4789	11.5038	8.51556	10.7037	12.2215	11.9834	12.163	12.2202	1.78077	0.985976
mz_2460.1635	7.33624	11.2141	9.22801	8.2627	8.12732	10.2477	10.0289	9.24504	10.1577	8.49645	7.36834	-1.96918	0.985976
mz_2944.5148	8.77231	6.81362	7.77087	10.063	9.67791	8.17246	6.90232	8.34427	9.49499	8.93126	9.20003	1.7357	0.985976
mz_0596.4368	7.63574	5.79982	7.32848	8.07631	7.77601	7.37304	5.35519	7.57383	7.60744	7.71596	7.40343	1.46363	0.985976
mz_1780.1379	8.75984	8.75349	8.99825	9.01003	9.07049	6.20139	7.29386	9.2649	8.95515	9.36159	8.5797	1.58375	0.985976
mz_1512.9810	7.57196	5.82389	7.32531	8.98909	7.85751	7.4747	6.66907	8.45856	8.94102	8.50673	8.52052	1.61545	0.985976
mz_0996.7322	10.0162	9.5913	10.2207	10.6538	11.3686	8.86985	8.09893	10.5907	10.6989	9.42373	10.2115	1.54466	0.985976
mz_1681.2651	8.68141	5.26277	7.92663	6.18101	5.35629	4.55424	6.0827	9.01695	7.37942	8.81057	8.81515	2.47103	0.985976
mz_1200.7662	6.92608	4.36627	7.23328	7.15331	6.92618	6.22286	6.48503	7.48265	7.9671	7.44035	6.90539	1.56291	0.985976
mz_3129.3982	6.51427	5.66525	5.92778	7.84444	8.02811	5.23818	4.64742	7.37762	8.40878	7.4142	5.62715	1.95917	0.985976
mz_1907.0509	8.58274	8.41654	8.26524	7.82606	7.71235	4.78711	5.75112	8.97005	8.41272	9.177	8.04947	2.0562	0.985976
mz_2804.0218	7.48484	6.07411	8.85092	8.72164	8.63958	7.09348	7.14491	8.08663	8.8347	7.23448	8.8868	1.57161	0.985976
mz_1208.8643	13.1646	12.4101	13.052	12.6148	12.3123	10.5593	9.97052	14.4309	11.6093	14.2554	13.0877	2.08589	0.985976
mz_1381.1859	6.89078	7.92648	5.19018	6.46864	6.84254	7.39463	8.22078	6.47976	6.56072	6.61361	6.54305	-1.39864	0.985976
mz_0789.5311	8.19023	5.79114	7.58712	8.03227	7.96756	6.68388	7.44283	7.61844	8.08532	8.45168	7.96692	1.34816	0.985976
mz_1134.7591	7.34867	4.66392	5.51835	7.19006	7.93103	5.25178	4.48426	5.19527	6.4392	6.31681	7.05081	1.82379	0.985976
mz_0291.1802	7.49887	4.44231	8.22123	4.49524	7.70976	5.06546	4.99829	7.04706	7.63094	6.11155	6.89671	2.11607	0.985976
mz_2806.0163	10.1081	9.01688	9.38867	10.4107	10.3758	8.38856	7.81414	9.61329	9.82062	9.17436	9.41186	1.38139	0.985976
mz_0610.3562	9.64604	5.64387	10.0214	7.84495	7.63977	6.84784	7.47027	8.04293	7.96159	8.20545	8.98693	1.88964	0.985976
mz_0596.3331	11.5894	10.1391	11.7098	11.2901	12.4374	9.58112	10.8652	10.8741	11.3594	11.4793	11.9081	1.38579	0.985976
mz_1021.4544	8.78544	6.60218	8.27695	8.42669	8.70227	7.65859	7.14304	8.46251	8.38425	8.16697	7.81912	1.24342	0.985976
mz_1480.4595	8.42309	6.01617	9.03089	8.20582	8.37316	8.13805	5.7104	9.37146	7.80136	7.68011	8.08135	1.74936	0.985976
mz_1593.1035	8.19855	5.20698	8.98604	7.43691	6.19101	6.48883	5.59528	6.55241	7.37684	8.36039	9.08088	2.00918	0.985976
mz_0777.3586	6.03409	9.73142	6.64808	7.08358	6.91787	13.4904	7.86644	8.95768	9.14472	7.03009	5.64519	-3.18008	0.985976
mz_1917.7862	9.23605	6.66853	9.84296	9.92077	9.69308	8.65854	8.95424	10.7035	10.9148	8.76519	10.2205	1.81835	0.985976
mz_1729.6075	8.8348	6.54833	9.0042	6.90035	8.06063	6.57011	5.37065	6.67414	8.73837	7.44544	8.04687	1.80007	0.985976
mz_1050.6724	15.4537	16.7631	16.3599	16.0572	15.2804	17.0289	17.0504	16.0064	15.182	15.3368	15.8433	-1.25753	0.985976
mz_1078.8832	8.36824	7.04016	9.49011	8.4659	8.99349	7.61339	7.65349	9.05835	7.98002	8.63593	9.05051	1.31964	0.985976
mz_1179.7599	11.7379	12.6967	12.6934	12.087	12.1323	12.9317	14.2299	11.5849	10.3914	11.3456	11.254	-1.6328	0.985976
mz_2879.0452	9.05758	5.81177	8.13139	9.14691	9.44097	8.5133	7.05612	8.61182	8.57271	9.07405	8.31097	1.66624	0.985976
mz_1474.0732	9.18217	5.81871	8.48002	8.55126	6.64204	6.8584	7.00083	7.84868	8.40029	8.92671	7.85374	1.6763	0.985976
mz_1771.5750	10.4387	4.68866	10.9226	11.4302	7.93481	5.50759	11.2115	11.0377	10.6059	11.4723	11.1377	3.48658	0.985976
mz_1141.6239	8.72799	7.40226	8.91218	9.50164	7.71339	7.47561	7.38714	9.54998	8.3059	10.4157	10.1921	1.7432	0.985976
mz_2186.3735	6.35648	5.26723	7.39433	7.87414	7.71372	6.40148	6.18888	6.6837	8.20145	8.02583	7.47581	1.51315	0.985976
mz_1904.0178	13.1439	12.8063	12.4438	13.2666	13.1195	11.1212	10.3115	12.6412	12.6608	13.0641	13.3893	1.55314	0.985976
mz_1215.9098	12.3273	8.24125	10.0093	8.14875	11.9581	9.72877	7.40916	11.9426	12.2178	12.4745	10.2377	2.70478	0.985976
mz_1074.6571	6.26717	8.82074	5.89829	7.78817	6.4659	8.82696	8.64973	7.94142	6.44788	5.78273	8.52046	-1.87681	0.985976
mz_1179.8057	6.78772	8.27885	7.98139	9.43758	8.59864	5.16917	5.19795	9.14903	8.33862	8.85845	7.92222	2.16889	0.985976
mz_0591.2889	10.6034	10.9641	10.3443	10.7513	9.32813	11.3405	12.2494	10.3299	9.4322	8.45505	9.62888	-1.65888	0.985976
mz_1454.0166	9.85586	8.54762	9.97984	9.56152	9.66897	8.98226	7.73136	9.64682	9.80239	8.96362	10.0537	1.27117	0.985976
mz_1206.5667	6.51428	7.38848	6.26057	4.71388	5.50957	10.8802	8.38489	7.55897	7.97531	7.18738	6.26207	-2.38677	0.985976
mz_1711.3327	6.96334	9.89051	7.11919	9.96859	8.79402	9.79629	9.20697	6.50494	7.21645	6.86891	6.95703	-2.0822	0.985976
mz_2841.0812	8.64923	7.4905	10.5968	10.4288	9.36538	9.28978	8.09857	9.4422	10.8795	10.3916	10.2629	1.70909	0.985976
mz_2186.8795	8.67441	7.90704	9.15194	9.39244	8.47369	5.30216	7.48866	7.50901	8.77838	8.8386	8.36436	1.74857	0.985976
mz_0959.6465	8.36208	9.7382	7.42285	9.29846	9.98124	10.8736	11.5545	9.78963	5.60637	7.33381	6.52057	-2.68271	0.985976
mz_1494.7309	7.30218	10.3384	8.31917	7.55222	5.54837	11.836	8.56542	7.43254	10.3971	5.84166	7.31639	-2.7829	0.985976
mz_1238.1047	6.3118	8.76669	7.77369	6.36417	7.81993	11.1974	8.76976	6.45613	6.62523	8.76569	8.85047	-2.20706	0.985976
mz_2170.5503	12.2664	11.9081	12.106	12.4572	11.4105	6.76237	9.2715	12.0574	11.6043	11.652	10.6096	2.45645	0.985976
mz_1076.8981	9.90546	8.04356	8.69478	9.59675	8.57358	7.58694	7.62249	10.655	9.84554	8.80661	8.5493	1.57739	0.985976
mz_3128.1028	10.6156	8.18614	10.42	11.0474	10.3666	9.40225	10.4579	11.4216	10.887	10.8996	10.9358	1.47544	0.985976
mz_0944.7325	9.68307	8.64015	9.47613	10.1246	9.11373	8.28528	7.66392	9.31918	9.90875	8.67972	9.79077	1.31554	0.985976
mz_0944.6597	8.96572	6.60821	9.44055	8.21512	7.82729	7.66312	7.89944	9.30451	8.67917	9.00758	9.27674	1.44933	0.985976
mz_2878.7980	7.88627	5.10985	7.34131	8.17193	5.15353	4.51123	6.5314	6.94332	7.80024	7.4487	7.94223	1.95178	0.985976
mz_1503.1363	7.52639	8.53717	6.73666	6.18764	8.19736	8.82515	7.95697	7.1316	5.45741	6.35774	6.60109	-1.66527	0.985976
mz_1267.7302	8.447	6.3083	8.37467	8.2774	7.2472	5.94185	7.76476	7.63833	8.13774	8.42728	8.40841	1.44812	0.985976
mz_1636.2600	7.41176	6.45842	9.20817	9.13893	6.57519	6.67757	6.24392	7.36029	8.83365	8.88758	9.1513	1.86089	0.985976
mz_1631.8180	8.71456	9.74141	6.70064	7.01979	8.30367	13.7331	8.94463	6.96825	10.4154	7.15598	7.81084	-2.92022	0.985976
mz_1372.0382	7.0929	10.4155	8.27103	7.48116	7.62985	9.01571	8.78304	8.83343	7.88549	6.61281	8.33098	-1.63754	0.985976
mz_1062.6935	7.56869	7.68943	8.1734	8.39524	8.83643	7.08459	5.0355	7.77194	8.59874	8.20073	8.27316	1.62412	0.985976
mz_2308.5194	7.68111	8.89792	8.02956	8.83615	8.4908	9.22141	12.7357	7.46983	8.93235	8.15819	6.71975	-2.24529	0.985976
mz_0613.2467	7.64498	9.84225	6.95756	5.75355	7.45676	7.86275	7.89954	7.56892	6.15539	6.51431	6.59886	-1.70356	0.985976
mz_2520.7944	8.78417	6.91057	7.3456	8.45019	8.40509	6.31645	7.82341	9.40678	9.31572	8.04751	8.75693	1.54719	0.985976
mz_0691.5534	11.7038	8.5448	10.3478	9.87254	11.0634	9.42488	9.4083	10.6882	10.3973	9.81366	10.5712	1.43125	0.985976
mz_1389.8398	6.80651	7.73839	6.40636	4.85561	5.61124	7.39304	7.5407	6.77682	5.83267	6.75762	5.46143	-1.49384	0.985976
mz_1124.8440	8.65114	7.80232	9.30048	7.54915	8.78577	7.13737	7.00416	8.77693	9.07475	9.33609	8.19671	1.39426	0.985976
mz_2876.0218	8.71845	8.96137	9.59883	10.1664	9.50161	7.77065	8.20934	9.8704	9.80833	9.44145	9.77695	1.29652	0.985976
mz_2520.1649	7.88215	8.64738	3.58131	6.75845	5.99468	8.36482	8.05508	5.17756	5.59012	6.8055	7.16871	-2.23595	0.985976
mz_2809.0186	10.0875	9.9869	10.4137	10.2318	10.7417	8.28934	7.58637	9.63889	10.9631	9.55142	10.0099	1.5839	0.985976
mz_1809.4951	12.5658	9.61848	12.5115	12.7308	8.78635	7.82362	11.3208	13.6354	13.0443	12.5133	14.3008	2.92338	0.985976
mz_0972.7838	9.69989	8.12821	9.76581	11.0292	10.6639	10.1678	8.7553	10.5795	11.4848	10.9072	10.6337	1.57841	0.985976
mz_2862.0425	8.59794	8.03606	8.1727	9.48895	9.42383	7.72435	7.4076	8.90096	8.86969	8.93114	9.74583	1.29371	0.985976
mz_0837.5920	13.2515	15.4276	14.1982	13.834	13.2803	15.7718	14.2078	12.9886	13.056	14.7831	13.6291	-1.50813	0.985976
mz_2616.7064	11.2919	8.10377	10.8483	11.2456	10.2718	9.20115	10.5838	10.7667	11.3896	10.1743	10.8217	1.55497	0.985976
mz_0876.6535	15.2806	14.332	15.417	15.3574	15.6847	14.7509	14.4576	17.0884	16.2602	15.7265	16.7406	1.43092	0.985976
mz_0784.4406	8.22368	11.1853	7.96769	8.04658	8.71856	10.6003	8.17317	8.32741	8.98926	6.55525	7.52	-1.9427	0.985976
mz_1442.9613	8.52401	7.03411	8.3035	8.02445	9.00838	6.744	7.96475	8.66206	8.62324	8.02532	8.79377	1.24797	0.985976
mz_0974.6093	10.0086	10.8873	8.92691	8.96377	8.89296	10.6846	10.7223	9.74297	9.99625	9.10942	10.116	-1.29513	0.985976
mz_1863.3230	7.11359	8.85375	7.05405	7.50473	7.67866	7.89009	8.28204	6.40287	6.21836	6.30094	7.44345	-1.37738	0.985976
mz_1444.2013	7.89688	9.34178	7.48637	8.8681	7.04443	10.7715	8.25952	7.26988	8.0296	7.03559	8.38547	-1.70555	0.985976
mz_0461.3837	8.6356	9.2118	5.60149	9.4365	9.55169	10.6925	12.5745	8.30828	8.47197	8.99471	8.11253	-2.43714	0.985976
mz_0927.5687	8.3113	5.66968	8.12292	8.00575	8.67191	6.88576	7.59821	8.43158	7.24163	8.80846	7.8211	1.45894	0.985976
mz_0773.5784	7.92057	11.6902	10.747	11.0322	10.0375	11.7095	12.209	10.4178	9.83534	10.065	10.8286	-1.75905	0.985976
mz_1032.8331	8.38578	11.7549	8.3954	9.40295	11.5828	12.8993	11.8371	10.0905	11.0282	9.787	11.4506	-2.14835	0.985976
mz_1408.9853	10.2697	9.69555	9.5099	10.2607	11.1477	8.47761	9.0499	10.537	10.914	10.5052	10.1183	1.33348	0.985976
mz_1687.2236	10.6358	11.6786	9.56113	9.27423	9.40675	11.2038	10.6105	10.3007	10.4319	9.00053	8.69137	-1.50147	0.985976
mz_0766.4876	10.0211	13.0037	9.98219	10.3442	10.6819	11.7144	10.7927	10.4355	10.9204	10.4989	8.78076	-1.62883	0.985976
mz_2172.8274	7.88045	6.59467	7.96993	7.84988	7.87451	5.65206	5.95565	6.83799	7.40864	6.21492	7.84376	1.41755	0.985976
mz_0607.4344	9.27914	10.7826	10.2272	6.77612	9.47382	11.1897	9.93898	8.9364	8.05687	8.04509	9.05795	-1.90554	0.985976
mz_1501.1508	7.06061	9.09625	6.15717	9.50974	7.10786	8.75859	9.14002	6.29204	7.03615	6.02577	7.55439	-1.90532	0.985976
mz_0603.3304	7.83001	5.39661	8.35043	8.66227	8.63366	7.07714	7.87495	8.37997	7.87701	8.22362	8.09277	1.47332	0.985976
mz_1841.8777	7.64439	8.42679	6.59305	7.69658	6.95853	13.4159	7.71447	7.95377	5.67774	7.3905	5.12716	-2.97219	0.985976
mz_0717.5827	8.6568	7.25153	8.55002	8.19753	7.2276	4.40341	5.61852	6.63706	6.28373	7.97995	8.9393	2.05118	0.985976
mz_1952.4603	6.16565	10.3928	9.94037	9.1615	9.44374	10.7529	10.2113	6.24844	9.07515	6.83008	6.78025	-2.49669	0.985976
mz_1239.6661	9.50008	7.03047	9.37657	7.94208	8.67732	7.68291	7.83328	9.33767	8.93873	8.05154	9.6201	1.41496	0.985976
mz_1504.1075	8.14032	6.90599	8.40848	8.02848	7.86406	7.57925	5.97683	7.52053	8.46399	7.95921	8.31115	1.26634	0.985976
mz_1977.5155	6.08728	4.50033	7.45709	6.77632	7.59915	5.61403	6.39387	6.82474	6.4953	7.56137	6.93442	1.46422	0.985976
mz_1922.0743	12.2927	10.0945	12.1752	11.6736	12.0044	9.42793	11.059	10.1513	11.5233	12.0303	12.0125	1.5391	0.985976
mz_1243.9544	7.11213	8.10033	6.93302	7.3096	7.99402	9.03612	9.33831	8.54289	7.54147	6.92201	7.17424	-1.38375	0.985976
mz_1202.8945	8.41743	5.99389	6.19526	6.93443	7.31186	5.34624	5.68435	6.76323	6.53597	8.03776	8.80312	1.70006	0.985976
mz_2064.7251	6.31989	5.71246	7.97815	7.88613	7.74633	6.32203	6.36773	6.92184	8.07536	7.35118	7.58387	1.34877	0.985976
mz_0701.4998	13.3976	13.8001	13.1847	12.1506	12.8208	13.7309	16.1421	11.4995	13.1898	13.1912	13.195	-1.72903	0.985976
mz_1797.2913	9.87266	8.24841	9.36719	11.0948	9.08283	8.44296	9.10805	9.55577	10.2753	10.9416	10.8303	1.52775	0.985976
mz_1579.4024	9.4071	7.64869	10.3571	8.7392	9.31203	8.79336	7.41242	9.15025	9.58543	9.04255	8.87545	1.35715	0.985976
mz_1413.8997	8.77465	5.58915	8.44218	9.50587	9.30815	8.78042	7.08457	9.19355	9.13903	8.07733	8.55213	1.72273	0.985976
mz_0611.2592	7.36324	9.06192	7.93957	8.93631	8.95255	9.1123	11.9564	8.21141	8.59759	7.13703	8.23911	-1.87145	0.985976
mz_1788.4882	11.3071	10.2147	12.4016	10.9579	10.8833	8.76626	10.6297	12.903	10.755	11.1453	12.2684	1.70749	0.985976
mz_1695.2596	7.41561	4.05591	4.88117	8.7678	7.68946	5.89074	4.95502	6.85147	5.75919	7.73098	8.29733	2.2069	0.985976
mz_0525.3198	14.5181	15.2647	16.1773	15.061	14.2775	17.4198	17.0976	14.1111	15.5584	12.4188	13.7237	-2.11331	0.985976
mz_1740.1982	7.66506	5.92298	6.62863	7.98939	8.39874	5.98116	5.36958	7.60967	6.55762	6.71253	6.41316	1.48894	0.985976
mz_2582.6974	9.04973	8.50731	9.01835	9.58127	9.11043	8.22434	6.06991	9.43021	8.95766	8.96652	8.56844	1.4848	0.985976
mz_3014.5818	10.4944	9.20642	10.0646	10.307	11.0057	8.43827	9.37642	10.2069	9.2184	10.8719	10.4244	1.31712	0.985976
mz_1790.1986	14.6263	12.8307	13.3204	14.1657	13.6341	12.4821	13.2548	14.2334	13.8158	14.2437	14.7455	1.24223	0.985976
mz_1672.4491	8.08097	6.39623	8.44488	8.77501	9.50975	7.1531	8.86749	9.48047	9.30979	10.6407	10.1643	1.82846	0.985976
mz_2535.2045	9.14489	6.57936	9.60451	7.73424	9.8575	7.34441	8.51666	9.73118	9.69343	8.90226	8.30176	1.64108	0.985976
mz_0821.7357	7.65599	9.92377	8.21038	8.53716	9.20436	9.26096	9.19926	7.78502	7.95252	6.63698	7.95585	-1.46905	0.985976
mz_0693.3949	9.03706	8.72852	7.40141	6.34138	4.68697	8.69399	8.06538	5.1634	5.58987	3.733	5.6701	-2.54307	0.985976
mz_0594.3859	11.3549	10.2651	10.9083	11.6449	10.9972	9.84045	9.50228	11.3593	10.2116	10.8098	11.3668	1.21234	0.985976
mz_1111.8334	12.1575	10.7505	11.6626	12.6687	12.4444	11.2693	11.1193	12.862	13.8401	14.687	11.9921	1.74293	0.985976
mz_1353.3336	7.00456	8.43618	5.9218	8.39754	7.4746	9.48359	8.05318	6.48225	6.98264	7.5724	7.10074	-1.54059	0.985976
mz_1113.7435	9.58339	7.79276	10.3365	10.3237	9.92881	9.42229	8.90729	11.225	10.6936	9.94808	9.28635	1.45824	0.985976
mz_1471.0949	6.85689	7.41964	6.35177	4.68333	4.77788	7.78047	7.94975	4.00669	5.47172	7.72463	5.80436	-2.00696	0.985976
mz_0613.3922	9.77082	6.32275	8.55226	8.40835	8.00628	8.39371	5.83686	8.24191	8.05288	8.21282	8.56205	1.62481	0.985976
mz_0884.6351	7.64719	9.28304	7.78372	7.22241	8.03361	10.4692	8.96778	8.1826	9.14346	8.47165	8.62917	-1.43412	0.985976
mz_1068.6988	6.53285	9.04702	7.11142	9.24818	7.22087	9.96907	10.0962	8.80541	8.61308	5.9666	8.32939	-1.97564	0.985976
mz_2981.5229	10.3826	10.8374	9.74201	10.642	10.3611	11.0792	13.8321	10.2538	9.55787	10.512	10.4605	-1.67725	0.985976
mz_1872.3648	9.3446	6.29118	6.74849	7.79269	6.94528	6.12432	6.95581	8.27363	9.18514	8.43882	8.33806	1.67623	0.985976
mz_1728.4671	12.6307	5.71153	13.1167	12.6675	8.273	8.36465	12.0409	14.2523	11.6908	12.6831	12.8273	3.56198	0.985976
mz_1608.1701	6.58115	8.01321	6.33789	7.33138	6.94006	7.56902	8.76072	6.6746	7.53231	5.54689	6.88651	-1.38547	0.985976
mz_2972.5461	8.77997	7.69711	8.22451	9.06634	8.975	7.77986	6.03282	8.42672	8.37016	8.49514	7.84771	1.35326	0.985976
mz_1051.5765	9.36858	9.08233	9.56647	7.62073	9.16256	10.5406	10.9574	8.45355	8.43726	7.24817	8.22837	-1.68273	0.985976
mz_0847.5317	9.61681	8.80178	8.72144	9.94295	10.4427	6.17879	8.5436	9.9899	11.1364	8.21663	10.5469	1.98531	0.985976
mz_1173.6750	5.98104	8.58755	7.08374	7.22373	6.78537	8.54357	10.436	8.2603	8.5146	7.6169	8.13061	-1.7395	0.985976
mz_1533.1218	8.46628	8.14352	8.12036	7.37834	9.01799	5.74083	4.09208	8.38284	8.01021	8.85612	6.62954	2.11557	0.985976
mz_1500.3027	8.29742	6.04061	8.70937	7.82152	8.29751	6.45423	8.26733	7.94211	8.27418	8.48413	8.72374	1.39802	0.985976
mz_1207.8453	10.499	11.0583	11.9278	11.1722	10.8364	8.85758	9.83185	13.3855	11.633	12.8864	12.0248	1.87972	0.985976
mz_0691.1974	12.0668	7.77061	11.846	13.2634	7.54889	6.62329	8.41304	14.5421	12.2111	7.29347	13.0922	3.88069	0.985976
mz_0947.6558	7.48082	7.80733	7.69664	6.66585	8.67503	5.39338	4.44257	8.01752	8.33771	7.03821	8.15969	1.87784	0.985976
mz_2836.8739	7.45959	6.27462	7.21938	7.922	7.38411	3.33426	7.2529	7.61999	7.55338	7.27146	7.25405	1.83991	0.985976
mz_0862.6978	8.65108	6.87836	8.60197	8.81513	8.55553	6.43602	8.02681	7.56375	8.37081	9.23901	7.99135	1.35985	0.985976
mz_1156.8162	10.5777	13.0477	11.8547	12.8927	11.4703	12.5126	13.1081	10.8934	11.237	11.7727	10.6124	-1.4756	0.985976
mz_1739.1896	7.28643	8.79374	7.83422	5.74392	8.55344	9.28407	8.57609	8.0505	6.40677	5.02374	6.18443	-1.9992	0.985976
mz_0959.6944	7.61675	6.03171	8.41536	7.64805	8.08624	6.68717	6.21487	7.70627	6.30261	8.5191	7.40332	1.40096	0.985976
mz_0857.3504	7.67398	10.6099	5.69338	6.40102	6.26924	11.6718	7.09836	9.3304	8.07469	6.0688	7.55975	-2.65944	0.985976
mz_1415.9512	8.80483	7.20838	9.16105	9.51321	7.74979	7.42756	8.165	8.98426	8.57187	9.18827	9.14254	1.28917	0.985976
mz_1072.8515	10.2371	9.16295	9.7009	10.6637	10.1105	9.01431	8.95598	10.5984	10.1417	9.85098	9.82913	1.09714	0.985976
mz_2263.5429	5.9229	8.54854	6.64395	4.61459	6.69519	7.46545	8.81515	4.89081	6.80282	4.7967	8.54781	-2.16203	0.985976
mz_2308.5593	9.29069	9.72354	9.19011	9.30128	9.70469	10.796	12.9818	8.49542	10.7114	9.24683	8.92639	-1.80877	0.985976
mz_0890.6199	9.06678	8.94845	8.61691	9.22731	8.04884	5.04859	6.22393	9.09605	8.60279	9.26829	7.63918	1.95545	0.985976
mz_1815.8858	8.39753	8.00671	7.07282	5.86597	5.38193	11.8353	7.10724	5.92347	6.58247	5.37824	7.01707	-2.53066	0.985976
mz_0689.3073	10.6235	12.1757	7.18642	10.5529	8.67974	12.8722	10.1983	10.7372	10.3118	7.16097	7.58639	-2.64385	0.985976
mz_1193.9175	7.44335	6.10301	7.80119	8.76669	9.02816	8.06049	6.98442	8.59935	8.8908	8.45681	9.09967	1.46144	0.985976
mz_1621.9580	7.45506	6.23179	7.79807	7.58249	6.09362	5.36726	4.64846	7.47037	7.8178	7.66835	5.24426	1.72542	0.985976
mz_0858.5737	10.0525	8.71646	10.2722	8.60803	8.74233	7.49672	7.96048	9.89445	8.59458	10.2432	10.0802	1.50305	0.985976
mz_0877.6562	11.3942	12.2411	12.998	11.8515	13.1429	10.1618	10.5366	12.5865	12.3127	12.9906	13.9202	1.66974	0.985976
mz_1616.1457	8.21227	6.05531	8.97487	7.59864	6.84464	7.6589	4.80836	7.27644	8.07676	8.89935	7.58864	1.75976	0.985976
mz_0885.8355	7.80939	5.16418	7.47255	6.72374	6.54965	5.13863	7.00398	7.31573	8.18507	8.70958	6.5772	1.64893	0.985976
mz_2834.4330	7.16533	6.25223	8.29344	7.02132	6.98795	5.93954	6.04504	8.24023	8.38819	6.65642	6.93585	1.38216	0.985976
mz_0644.5107	9.08478	6.72932	7.76948	8.5901	7.14843	6.95425	7.43385	9.69589	8.07661	9.08633	9.08486	1.52792	0.985976
mz_1707.7561	6.28105	9.42511	6.07781	6.81227	6.37748	8.61189	9.05031	9.38557	6.98837	8.42725	6.86195	-1.87763	0.985976
mz_0583.1198	7.90499	8.58627	7.95341	6.24474	8.52876	9.27168	9.97506	7.14819	7.18675	9.0545	6.87152	-1.66606	0.985976
mz_2184.6078	9.87773	9.00436	10.451	10.5259	10.148	9.00087	9.70849	10.6505	10.7189	9.88917	10.5019	1.10748	0.985976
mz_0939.6433	8.08349	6.38078	6.64289	11.049	9.52255	7.40535	7.08141	9.04064	8.82699	9.43809	9.1029	2.00748	0.985976
mz_2127.5531	11.5017	11.247	11.4764	11.9637	11.6759	9.18773	10.7578	11.8695	11.5268	11.6956	11.6017	1.26639	0.985976
mz_1037.6019	8.47337	8.92736	10.5293	8.1183	7.88806	10.8628	10.7734	7.56156	8.78072	6.66663	7.41082	-2.00926	0.985976
mz_1256.8691	8.00343	4.74758	7.76494	8.50555	8.12965	6.03825	7.85819	7.52837	8.72966	7.11507	7.33717	1.67456	0.985976
mz_2118.8978	10.8675	6.73616	7.88878	8.68706	5.94205	5.60611	4.85216	7.4217	9.17238	7.69974	6.99677	2.35303	0.985976
mz_1345.9093	10.8683	12.6576	11.4491	10.8391	10.403	14.7188	11.4247	12.0179	10.7725	11.9298	11.3357	-1.73181	0.985976
mz_1727.5124	10.9839	7.58641	11.5087	12.5175	8.55202	6.13339	11.7452	13.4859	11.6518	11.736	11.583	3.01401	0.985976
mz_1790.0495	8.56416	7.61449	8.9155	8.92891	9.53399	8.12795	7.38999	8.97689	8.1455	9.37406	8.59053	1.16788	0.985976
mz_1534.9865	8.71813	6.0511	8.83101	7.13584	8.14125	7.90832	5.22789	7.74576	8.25818	8.50136	7.08082	1.65578	0.985976
mz_0877.3191	6.85323	10.0489	6.33543	7.59783	8.05407	12.1083	6.76116	7.65914	7.81783	7.2655	7.10016	-2.30407	0.985976
mz_2158.4548	8.58743	8.65258	9.75651	7.9478	8.77203	10.5442	11.3465	7.16119	8.34031	8.92444	8.13401	-1.72812	0.985976
mz_2596.7741	8.2079	7.82839	8.20816	8.63977	7.90327	7.25952	6.54368	8.16382	8.26497	9.06798	8.63469	1.17579	0.985976
mz_0859.6171	8.89134	8.48413	8.5331	8.83839	9.37866	7.55083	8.01449	8.94189	9.65106	9.78085	9.87721	1.22008	0.985976
mz_1201.1407	10.5509	6.72702	10.2718	10.0107	8.37174	5.30915	7.69693	5.94952	8.81879	8.352	9.32615	2.37875	0.985976
mz_0960.7873	7.8546	7.05329	9.32615	8.04855	7.50857	7.2703	6.12507	8.83674	8.51942	8.60501	7.21525	1.42307	0.985976
mz_1615.7867	7.96138	7.74307	5.74805	5.05033	3.34637	11.5424	6.81971	5.24497	6.65506	5.82874	7.25502	-2.81548	0.985976
mz_1525.7367	7.23236	7.59147	6.55564	6.72892	7.15588	12.9424	7.25768	5.35807	7.61035	5.83725	6.08831	-2.69299	0.985976
mz_1811.1098	6.892	8.98428	7.81638	7.00259	8.62913	9.97483	9.02688	7.55579	6.30086	6.35485	9.48972	-1.8235	0.985976
mz_1011.5509	11.0632	10.104	10.3625	9.85101	9.43349	8.2845	7.8995	10.8303	10.1782	9.95595	10.0986	1.45898	0.985976
mz_1256.0472	8.53511	6.68015	7.70775	7.3092	8.34892	6.14653	5.95733	6.09148	8.50165	7.45221	7.92365	1.47241	0.985976
mz_1494.0983	16.9541	15.4306	16.2781	16.8041	16.718	15.8636	16.3355	17.4824	17.2868	17.358	17.2969	1.14574	0.985976
mz_1226.8945	9.39396	8.04674	7.19911	9.76816	9.22491	7.20559	7.21707	9.10573	9.48563	8.91595	8.61136	1.4733	0.985976
mz_0979.6914	11.0714	8.72896	9.07758	8.89726	9.55559	5.93547	9.10493	10.6912	10.2752	9.7184	9.23001	1.89146	0.985976
mz_0740.5460	8.51363	7.51424	9.52495	9.01126	8.26921	8.22207	7.61404	9.14961	9.42527	9.09041	8.56492	1.16021	0.985976
mz_0336.1207	7.78375	8.44185	5.57937	7.1601	9.2631	8.9724	9.2449	6.29768	6.33308	7.53869	6.31682	-1.85231	0.985976
mz_0669.5581	6.58342	9.42585	7.88987	7.70134	7.92821	8.95687	8.61869	8.50208	7.19134	7.04019	4.94838	-1.77737	0.985976
mz_1400.3758	9.21509	7.97847	9.47207	9.2774	9.626	8.02499	9.09006	9.33729	9.64021	11.106	9.91989	1.33473	0.985976
mz_1794.4539	8.75615	5.39359	11.5074	11.1777	6.88237	7.60489	9.03359	12.2234	9.40537	10.9718	13.0274	3.14992	0.985976
mz_0569.0678	7.40101	8.16967	7.4627	5.26548	6.75933	7.94089	8.61046	6.40918	7.9452	6.39784	6.30864	-1.49667	0.985976
mz_2286.2839	9.54131	7.78723	9.63633	8.40962	8.93248	8.87333	5.48386	9.15848	8.89004	8.61584	9.12021	1.65656	0.985976
mz_0943.5636	9.72932	5.88273	9.25267	8.92085	7.34783	5.64581	7.95716	6.99174	8.08953	8.32138	7.85024	1.81771	0.985976
mz_1439.9711	10.2769	9.61121	10.6189	9.88588	10.8398	10.2958	7.16743	11.408	10.4609	10.7479	10.9638	1.62548	0.985976
mz_0795.5779	11.3169	11.1859	11.8923	11.8037	11.9785	10.1879	10.1739	12.3042	12.2287	10.8779	11.4558	1.21637	0.985976
mz_0775.5131	13.1257	14.3569	11.1149	11.2676	13.3403	13.3682	12.4155	10.5495	10.2299	11.2197	10.4803	-1.96424	0.985976
mz_1285.7443	13.159	10.9435	14.2546	12.3501	11.0142	10.7646	11.9568	12.6533	13.1542	13.2804	12.8601	1.61908	0.985976
mz_1427.6887	8.08883	4.28552	6.3508	5.90154	7.32052	6.08279	6.00203	8.93977	7.28072	6.35889	7.99959	1.8233	0.985976
mz_2236.5593	8.386	6.99113	8.51088	8.42157	8.16101	7.34307	7.86698	8.27718	9.49014	8.71048	8.34461	1.13734	0.985976
mz_1706.4368	9.79125	5.99898	10.395	7.99392	7.62135	5.99425	8.01374	8.10802	6.97283	10.6755	10.4026	2.32606	0.985976
mz_2565.7710	7.12531	6.48299	8.69231	7.30352	8.12564	5.17641	7.30237	8.33438	6.69311	8.18782	8.48238	1.54747	0.985976
mz_0565.3112	11.5872	13.1186	10.1717	10.5656	11.2149	11.8317	11.3938	9.98259	10.8234	11.2259	10.5194	-1.35337	0.985976
mz_2543.1959	8.90099	7.10092	8.73349	8.99262	7.37324	5.92067	7.81481	7.79671	8.40222	8.73349	7.87054	1.40494	0.985976
mz_2956.9541	8.59408	7.64285	8.11864	6.56599	7.39466	5.45928	3.75273	7.59668	8.18609	7.91566	6.35759	1.97288	0.985976
mz_1068.6829	17.2227	17.9054	17.1649	16.8638	17.3318	17.8954	18.2679	14.5946	14.6748	15.181	16.5007	-1.83109	0.985976
mz_0967.5401	8.29071	6.09818	7.23188	6.80881	6.21055	6.63821	3.98244	7.68891	6.74928	6.88388	7.87447	1.64437	0.985976
mz_1665.7092	7.84521	9.07142	7.17057	7.84159	8.94231	10.8058	10.3368	7.71851	7.72957	10.6482	6.3861	-2.03608	0.985976
mz_1114.8492	8.73083	8.21597	9.42943	9.37219	8.95953	8.30852	7.21501	8.38458	9.13999	9.98941	9.01239	1.21413	0.985976
mz_1210.9900	9.41813	8.47926	9.69774	10.2959	9.70741	7.00937	9.94465	9.72151	10.4153	10.2675	10.1382	1.47996	0.985976
mz_0647.2909	8.52696	5.93779	8.85131	6.77937	8.82795	5.98759	8.56412	9.01243	8.95	9.13988	8.44476	1.73675	0.985976
mz_1380.2616	8.31836	5.39103	8.22075	7.75343	5.22688	5.00949	6.93879	8.20569	8.06326	7.61664	7.19499	1.79523	0.985976
mz_1045.8770	9.88246	6.51094	9.24162	10.6027	9.2774	7.97874	8.59127	8.48694	10.2683	7.72194	10.1894	1.7652	0.985976
mz_1135.8453	5.66903	7.6287	6.60948	8.15051	7.98359	8.99884	8.73805	6.9383	6.75577	6.91493	5.50668	-1.63916	0.985976
mz_1657.2858	13.7701	11.9856	13.8873	13.7024	11.8193	12.995	11.7968	14.1909	14.3372	15.4217	15.0251	1.76009	0.985976
mz_3009.0355	8.76074	9.02864	9.74221	9.76956	9.28333	6.77792	8.48514	9.00656	9.3807	9.89994	9.88228	1.36843	0.985976
mz_1111.7067	10.6516	12.0043	10.2469	11.3341	11.3326	12.4571	13.3818	10.4731	12.3249	12.1413	10.6743	-1.46706	0.985976
mz_1758.1571	9.22062	6.81183	6.71675	7.43913	7.90401	6.41	6.22459	9.08092	7.44095	7.52388	8.91745	1.54832	0.985976
mz_1697.3007	6.9662	7.35513	5.30938	6.40138	6.61772	7.20516	7.92429	5.45611	6.07114	6.62003	6.57481	-1.24276	0.985976
mz_1783.5750	10.5088	6.33918	10.7389	11.2486	7.57915	5.92239	11.1946	11.9007	11.0839	10.8788	11.3912	2.84751	0.985976
mz_1662.1794	8.77252	5.72682	7.12308	8.31207	7.49757	7.64195	7.16923	8.21207	9.20828	8.66932	9.11675	1.51796	0.985976
mz_1583.1919	8.56948	6.98071	7.22346	7.97351	7.83838	6.23366	6.90548	8.40965	7.28712	7.73628	7.84887	1.15423	0.985976
mz_2539.6748	9.65649	10.0528	9.46441	9.02489	7.40504	10.0107	9.95101	8.8723	8.2258	8.00074	8.4803	-1.3636	0.985976
mz_0616.4184	9.31322	9.90293	8.73545	8.14771	8.81018	10.481	9.93702	7.80599	8.51857	10.1081	7.1086	-1.53852	0.985976
mz_1684.3080	12.0355	10.7685	11.6723	12.5665	11.7395	10.9697	9.83706	10.9172	11.3436	12.1888	11.5268	1.22371	0.985976
mz_0504.2651	6.77415	8.26142	6.55647	6.96203	5.24814	8.80883	7.53109	7.36385	5.96841	6.95066	7.89099	-1.48611	0.985976
mz_0663.4970	8.36426	10.7902	6.78755	5.47036	9.05023	9.1585	9.68024	9.80614	8.24831	6.83789	7.38905	-2.13208	0.985976
mz_0553.2521	8.46127	8.28756	7.07872	7.61152	9.26607	10.6046	10.0329	7.50192	7.45142	8.55867	8.48575	-1.58975	0.985976
mz_1406.4227	6.83679	8.97394	6.72675	8.21209	6.9497	7.53416	10.2235	8.10724	8.11851	6.73237	6.65049	-1.6188	0.985976
mz_1225.8941	8.42649	5.64813	8.53123	7.89999	8.02623	7.71492	7.20336	9.0595	8.64447	7.33352	7.99555	1.38415	0.985976
mz_1109.4704	8.95979	7.39181	9.37894	8.51523	8.84764	8.16822	8.0273	8.88647	10.0325	8.66469	8.86019	1.15574	0.985976
mz_0784.4759	6.41433	7.26657	6.80674	6.18258	5.84532	8.51089	8.07116	7.73243	7.3306	5.91627	6.59922	-1.34611	0.985976
mz_0785.3284	8.28903	5.75218	7.74658	8.15724	7.20858	5.46905	6.81636	8.39857	8.38722	5.49519	7.61924	1.65018	0.985976
mz_3031.0246	9.15557	8.20234	9.70966	9.97102	9.25933	7.19042	7.64979	7.49873	8.4882	9.32798	9.40468	1.42105	0.985976
mz_2337.0091	7.16993	4.53789	7.67641	7.42762	5.5461	7.03328	4.67951	6.29529	8.25829	8.06869	7.23403	1.79265	0.985976
mz_0567.4231	8.41165	8.3722	9.67558	8.94857	10.0143	8.36419	6.02789	8.24494	9.36854	9.21906	9.09124	1.53364	0.985976
mz_2516.2261	8.76179	10.9125	8.94333	8.52494	8.87884	10.0599	9.72108	8.50861	8.57787	8.09919	10.4932	-1.38268	0.985976
mz_2039.3476	8.72635	8.08279	8.83079	8.98028	8.96828	7.70765	8.13847	8.7205	9.92181	8.8672	9.63146	1.10453	0.985976
mz_1211.7428	7.65093	8.68818	9.1289	9.0196	8.81711	4.68227	6.38919	8.37456	9.51136	7.43484	8.20809	1.93163	0.985976
mz_2953.4600	8.92329	6.23682	8.33176	7.18557	6.626	6.39374	6.91513	9.11572	8.87122	8.14505	7.27385	1.54382	0.985976
mz_2329.5417	9.87002	9.94642	9.57583	10.2921	9.80829	10.7858	12.3958	9.7278	9.14741	9.68603	9.54312	-1.33635	0.985976
mz_1730.4464	11.7614	6.61135	12.2026	9.98378	8.44732	8.32869	9.63461	9.05888	10.0517	12.5151	13.6029	2.76141	0.985976
mz_1708.1848	9.71299	8.52738	10.1965	9.87436	8.86886	8.96357	8.82148	10.8532	10.7206	10.3272	9.65045	1.25471	0.985976
mz_1940.6540	11.937	10.1052	10.146	10.2743	11.4034	6.8008	10.0254	11.6714	11.6874	9.56798	10.832	1.96278	0.985976
mz_2856.9517	8.76097	7.54291	8.72433	7.21177	8.10918	6.74382	6.42838	8.16453	8.05509	7.62729	8.24501	1.20723	0.985976
mz_0574.2528	11.4889	10.869	12.0583	7.50415	9.4044	12.653	11.6255	8.37048	9.2007	8.18291	8.41441	-2.38782	0.985976
mz_1498.0827	5.68679	8.22584	5.7994	6.39413	5.92801	8.41582	8.21542	7.84606	6.88641	8.26726	7.07138	-1.55076	0.985976
mz_0774.3896	9.00576	12.3458	7.54469	8.63294	8.32754	10.6666	9.12803	9.1489	10.3754	7.9365	9.6928	-1.8804	0.985976
mz_2179.3797	11.7806	10.2867	12.7716	9.65591	10.6451	9.45105	8.58404	11.2436	10.8362	11.5691	10.2998	1.65963	0.985976
mz_1189.7502	12.9034	12.437	12.8979	13.2332	12.805	14.2514	16.1698	12.7917	11.9238	11.3734	12.0666	-1.7867	0.985976
mz_1052.0730	10.4349	9.38592	10.1645	10.7407	9.68567	9.53343	8.72921	9.93205	10.586	10.7895	10.1221	1.09073	0.985976
mz_0756.3309	5.95875	10.4512	5.84652	6.89791	7.51693	9.49788	7.99205	8.44682	8.57331	7.70251	8.42647	-1.89256	0.985976
mz_1696.1500	8.35052	6.95998	7.64914	6.28251	6.93354	6.71235	5.19208	8.39772	8.13726	8.83265	8.58504	1.60791	0.985976
mz_2383.8449	9.5677	10.0265	9.97674	10.4399	10.0149	7.70192	8.42517	9.84777	9.94326	10.1172	10.0018	1.27077	0.985976
mz_0765.4795	11.7978	14.3462	11.7992	11.098	11.9904	13.3194	11.9063	11.3027	11.6698	12.4151	9.17517	-1.78462	0.985976
mz_1120.9462	9.86874	8.80277	9.78012	9.04022	8.08958	10.2547	12.2902	8.29535	7.036	7.2972	6.761	-2.17819	0.985976
mz_1064.8828	15.4879	14.4911	15.0297	16.0312	15.8861	13.969	14.9133	16.113	15.583	14.97	15.4879	1.11581	0.985976
mz_2159.4627	7.77687	8.55403	9.94974	8.53287	6.60419	11.2837	11.1654	8.91089	8.30166	8.10699	9.2249	-1.90837	0.985976
mz_0796.5545	6.85283	5.95851	7.91359	7.99753	7.76202	6.12103	7.3605	7.10794	7.87325	8.07705	7.86251	1.20083	0.985976
mz_1733.4925	10.0377	6.94094	10.3255	11.1988	7.6153	6.39753	7.75336	8.21049	6.71185	10.1736	10.263	2.28644	0.985976
mz_1374.9348	9.38138	7.56429	10.1196	9.20442	8.6695	8.92551	7.56355	8.86788	8.92367	9.35626	9.24215	1.20283	0.985976
mz_0906.6301	12.5727	11.6673	12.9642	11.8498	11.9109	10.1039	11.4905	11.9234	12.7496	12.2557	12.1578	1.21079	0.985976
mz_1790.1951	9.41417	4.67278	8.1376	8.7662	5.23958	7.11056	5.35691	8.28017	8.84276	8.13354	6.3807	2.18592	0.985976
mz_1083.7023	8.22401	9.9058	9.79074	8.76352	8.50363	10.4256	10.0856	8.39945	9.16545	9.86245	7.8355	-1.32092	0.985976
mz_1290.8091	7.34213	8.80802	8.20143	8.80642	7.25999	8.67737	9.70043	7.08326	8.36887	7.94689	7.20816	-1.2848	0.985976
mz_1183.8275	7.10128	10.0438	8.98703	10.4526	7.64146	10.7261	10.4909	8.21617	9.68697	8.50374	9.2523	-1.69008	0.985976
mz_2055.7652	7.74284	5.00675	7.60428	5.99595	7.89905	6.55073	6.9001	8.91654	8.08742	7.74823	7.58588	1.545	0.985976
mz_1136.8475	9.15307	13.4217	7.98583	8.36472	10.0922	10.9288	9.80879	9.71259	11.4433	8.08421	6.81586	-2.42996	0.985976
mz_1044.6465	7.32036	8.56244	8.22398	8.49027	7.54572	8.73034	9.18567	6.88458	8.19448	6.71337	6.69647	-1.3175	0.985976
mz_0405.1785	9.106	9.08939	9.8164	9.80877	9.38729	8.17789	7.88316	9.97335	10.2565	9.48833	8.7326	1.18768	0.985976
mz_2307.5073	7.53206	7.53543	5.83259	8.38035	7.62236	8.47761	11.2384	7.68977	5.28982	7.30024	5.69705	-2.16577	0.985976
mz_0747.5147	9.52608	7.62687	9.96043	8.87394	9.59648	7.65956	9.29266	10.1153	9.95577	8.6279	9.35561	1.30841	0.985976
mz_0812.5131	10.008	9.33265	10.2075	11.0531	11.3462	9.58667	8.94105	10.2403	9.83845	10.0762	11.2151	1.21132	0.985976
mz_1767.0651	7.52841	8.04793	6.6473	8.06365	6.93635	8.6974	8.11641	6.69271	7.66377	6.15272	6.06125	-1.31897	0.985976
mz_0700.4242	9.71955	8.80219	11.3741	11.2949	9.75116	6.13293	11.5601	12.5956	11.3058	13.462	13.2937	2.76785	0.985976
mz_3127.4037	7.14733	8.10817	8.51172	9.05472	8.62886	4.11407	7.29662	8.44929	8.39377	9.45525	7.82661	1.92716	0.985976
mz_1118.9450	8.82415	7.92017	8.78561	7.95418	8.62438	7.30158	6.5784	8.54944	7.7855	9.36235	8.01578	1.22096	0.985976
mz_1184.6383	8.07398	12.217	8.22068	9.9774	10.3489	10.3023	10.5466	9.78849	8.90347	10.2132	9.71482	-1.61686	0.985976
mz_2182.9245	7.92716	5.99026	7.76995	7.8973	7.99876	7.09348	7.31353	8.02134	8.00443	7.50747	7.67673	1.0513	0.985976
mz_1511.1579	8.05511	5.89701	8.77091	8.32938	9.35865	5.62869	7.09274	5.34688	9.18954	9.33056	7.39929	2.01639	0.985976
mz_2359.6919	12.0328	11.4099	11.5602	11.9499	11.6441	7.83628	11.4498	11.7562	12.5783	12.5494	11.7866	1.75018	0.985976
mz_1233.9091	7.8548	5.11862	7.4133	8.59316	9.71828	4.09906	9.94989	9.34777	9.08636	10.8833	10.2447	2.75352	0.985976
mz_1153.8593	4.71452	9.16792	6.70825	7.3724	9.56993	12.0358	7.39959	7.15376	5.89498	7.24565	7.25913	-2.54462	0.985976
mz_0632.2841	16.4891	15.661	16.1761	16.2561	16.8189	12.3595	15.9292	16.5084	16.1407	15.9757	16.147	1.66411	0.985976
mz_0891.7161	11.3127	9.96286	9.64554	10.9516	11.2692	9.70072	8.3748	10.7882	10.5198	10.2648	10.3199	1.28786	0.985976
mz_2927.9862	6.78983	8.33229	7.35599	6.69083	8.09694	7.98092	7.90751	6.53598	5.56592	6.5398	6.61971	-1.2992	0.985976
mz_0494.2663	6.99321	7.98452	7.44036	6.51936	6.96947	8.20597	9.65374	3.47554	7.77459	6.51403	7.11943	-2.01399	0.985976
mz_1394.9697	15.2682	13.114	14.6426	13.3497	14.4615	13.6063	13.8365	14.8242	16.2462	15.4186	15.3799	1.42995	0.985976
mz_0802.4113	11.3479	10.7285	11.2258	10.2383	8.37204	12.3442	12.8519	10.4759	10.0249	9.46658	10.9135	-1.71676	0.985976
mz_0969.4431	7.4686	6.44065	6.28763	6.57591	6.5251	4.05224	6.09207	7.1422	7.84262	6.68535	7.06512	1.42075	0.985976
mz_1469.3207	11.5474	8.19583	11.1852	11.5567	11.268	9.93367	11.1189	11.0557	10.9357	10.7243	10.8873	1.39557	0.985976
mz_0787.6000	9.51096	7.71396	8.85843	8.13792	9.18857	7.82364	7.58791	8.29851	9.08518	9.24362	8.27845	1.1167	0.985976
mz_1653.7613	6.51954	5.6764	8.07402	7.32345	7.81275	3.80333	8.03418	8.08543	8.08933	7.31991	8.37624	1.86212	0.985976
mz_2115.5092	7.27993	5.43619	6.48308	8.74233	8.96728	7.04592	7.70309	9.48577	9.12557	8.93615	9.20806	1.80012	0.985976
mz_1341.9677	12.8173	9.28749	12.3895	11.9461	12.0188	11.4706	11.3495	12.9084	12.1604	12.079	10.9151	1.45183	0.985976
mz_2647.6520	10.3402	9.98178	10.14	9.08069	10.0233	8.59865	7.28987	9.79553	10.0762	10.312	10.2846	1.38312	0.985976
mz_1443.9759	8.49855	5.14082	8.45766	8.05047	7.9873	6.59185	8.60767	8.70174	7.89735	9.05544	8.1235	1.56639	0.985976
mz_1405.7267	7.75941	9.97579	8.04343	9.20673	8.65773	9.83618	11.6383	9.98334	10.171	7.55263	9.07774	-1.67694	0.985976
mz_0552.3507	11.7497	9.78098	10.9941	11.4571	11.1216	9.77128	11.1701	11.0824	11.8147	11.9655	11.0358	1.16184	0.985976
mz_1194.8965	10.8769	11.2676	9.3668	10.7218	9.74109	11.5883	11.5093	9.78416	10.4298	10.7065	10.7327	-1.1601	0.985976
mz_1493.0201	8.81174	6.48139	8.99601	8.80787	9.44041	6.66084	8.4992	7.67022	8.78389	9.57962	7.5724	1.49396	0.985976
mz_0545.1641	5.64508	9.43716	8.70836	6.589	6.63705	9.18901	9.98638	8.65472	6.61367	8.59509	9.25486	-1.95029	0.985976
mz_1527.3626	10.0883	6.89777	10.6295	11.6146	9.01007	8.40615	10.6201	11.7727	9.97937	10.4719	10.9559	1.92398	0.985976
mz_0275.1489	13.5737	14.7791	12.8269	12.068	10.4916	15.009	12.4544	11.0156	12.7715	12.077	12.9977	-1.85307	0.985976
mz_0989.6965	9.73387	9.77822	9.30382	7.59975	9.40752	10.9672	10.4837	9.97614	8.55727	7.7332	9.0879	-1.48477	0.985976
mz_0759.5170	7.98668	7.33102	7.63697	8.49819	8.27181	7.31087	7.259	9.00428	8.42658	8.79162	8.17358	1.04842	0.985976
mz_0962.6411	10.4362	9.28163	11.2111	10.5934	11.212	9.61522	9.89863	11.5276	10.4983	9.64583	11.3524	1.21111	0.985976
mz_0594.4375	14.4315	15.0301	13.9047	14.8249	12.9385	15.3573	14.9166	13.2698	11.2161	11.6971	13.8239	-1.83802	0.985976
mz_1950.4177	8.93937	7.52887	8.34461	8.13947	8.26699	7.73468	5.0031	8.31742	7.66154	8.13142	7.78661	1.44288	0.985976
mz_2346.2534	9.70636	8.67078	9.94852	8.9595	7.26556	6.98494	7.18006	9.85428	9.41358	8.72923	9.37661	1.54478	0.985976
mz_1030.8045	11.2335	11.1789	10.9427	11.1616	9.71697	11.8083	11.9369	10.1806	10.0023	10.282	9.22016	-1.2989	0.985976
mz_1624.2718	7.23692	5.4848	7.35475	7.53163	7.4489	6.45973	5.19401	6.02374	6.17181	7.28971	6.63574	1.2488	0.985976
mz_1859.2764	7.91225	9.62116	9.8248	10.5157	9.82772	11.1736	12.3203	10.3619	7.3783	8.1932	7.35788	-2.11689	0.985976
mz_1279.8418	6.86477	8.85578	6.20775	8.09679	7.26242	7.82954	8.2624	6.59873	7.76482	6.23233	7.21685	-1.28535	0.985976
mz_1327.1207	9.03968	5.39198	7.65441	7.67162	5.67932	5.13699	5.30066	8.90688	7.21871	6.53568	5.18789	1.96023	0.985976
mz_1764.1829	14.3855	13.2342	13.2583	13.8483	13.2827	12.2537	12.956	14.2658	13.8103	14.178	14.3813	1.11159	0.985976
mz_1686.3099	11.1443	9.32748	12.9564	11.9316	12.4747	13.4355	7.32941	12.3457	12.1873	14.3947	13.6067	2.59936	0.985976
mz_1139.7463	14.6685	15.4755	16.107	14.8381	15.0549	15.7376	16.7015	14.0807	14.2263	13.3535	13.8202	-1.45289	0.985976
mz_0964.8676	8.52962	8.29584	7.66878	7.66486	7.64477	8.86473	9.27649	6.9114	7.65218	6.94575	8.15371	-1.16597	0.985976
mz_1604.4603	7.13243	7.87529	7.80721	7.52021	7.22753	8.86483	9.32857	7.53135	8.19503	7.09557	7.93937	-1.13347	0.985976
mz_1320.8684	8.38946	10.3337	10.8718	9.83838	8.51777	11.4252	12.0994	9.81995	10.6669	10.3661	8.60164	-1.65213	0.985976
mz_0889.5869	18.7258	16.7243	18.144	17.6611	16.7571	16.2843	17.6858	18.8057	18.8054	18.381	19.3235	1.42729	0.985976
mz_0907.5061	7.23218	7.95633	8.38525	8.44447	7.84821	6.85588	4.59417	8.10252	8.3786	7.63806	8.06161	1.54257	0.985976
mz_2172.5034	7.58464	6.41462	7.67509	8.39804	8.4623	7.50111	7.38804	8.32004	8.43595	8.10949	8.33784	1.06416	0.985976
mz_1462.6945	6.8259	6.20197	6.87222	6.74528	6.76837	4.95873	6.27957	7.32759	6.48344	7.67165	6.76989	1.11962	0.985976
mz_1444.4822	8.44637	8.34032	9.80965	9.20917	9.18705	7.76819	7.7497	8.12066	9.59798	8.99864	9.7399	1.18594	0.985976
mz_2744.0006	6.01361	8.83565	6.81612	7.51008	8.10377	9.03642	9.5554	8.35006	8.86605	7.20382	8.31991	-1.49456	0.985976
mz_1109.9458	8.12144	6.86657	7.43862	7.9336	7.63572	6.10108	7.07792	7.50219	7.66708	7.43868	7.67791	0.99505	0.985976
mz_0583.4932	8.13157	5.67664	7.94797	6.77026	7.09915	5.52422	7.2165	7.00833	7.31228	7.1819	7.50462	1.23039	0.985976
mz_1550.0988	9.63271	10.0947	10.9561	11.3944	11.6552	10.9442	7.97246	11.6795	11.5577	11.9037	11.6029	1.62731	0.985976
mz_0452.2783	13.5762	13.1653	14.5415	14.6248	12.9706	16.7042	16.315	12.2566	13.6615	13.778	12.4364	-1.91415	0.985976
mz_2600.2064	7.66222	7.21504	8.74611	8.36812	8.45819	7.59378	7.17926	8.44306	8.94821	8.22363	8.00951	1.02802	0.985976
mz_0828.4904	6.70395	8.44485	8.68799	5.419	6.77479	7.70604	8.62949	6.54395	7.4136	5.9621	5.71286	-1.60784	0.985976
mz_0848.6246	8.8239	12.0974	10.5554	11.5249	9.95158	11.7973	14.0666	9.97175	11.6572	11.1153	12.4856	-1.89303	0.985976
mz_2230.6497	9.04361	8.46282	7.98725	9.2734	8.66205	6.94652	7.68339	9.02803	8.75442	9.06834	8.79487	1.12892	0.985976
mz_1373.0056	7.39438	6.28627	7.43388	9.8917	7.87326	7.19217	6.32368	9.11142	9.50959	11.9411	7.435	2.22309	0.985976
mz_2752.9772	7.09875	9.8591	5.8703	8.0812	7.94793	9.64485	9.34662	8.3994	9.26509	8.77356	8.60305	-1.61195	0.985976
mz_1851.5421	10.7554	8.65511	10.2652	10.8955	7.95287	8.17218	6.26535	11.4619	7.64602	9.30941	12.1391	2.35562	0.985976
mz_0899.5466	8.47285	7.75406	8.52508	8.79257	7.49451	8.21364	4.29641	8.95822	8.47704	9.09902	8.46958	1.7814	0.985976
mz_0876.7416	7.32511	8.2636	7.96645	5.25011	6.51704	8.42156	8.34591	6.83133	7.42472	7.77774	5.86324	-1.47422	0.985976
mz_1973.8477	9.62029	11.6143	8.39336	8.17584	11.6485	12.5372	9.49762	8.6281	8.76855	8.42831	10.0769	-1.99889	0.985976
mz_3099.1035	6.34224	7.67528	9.37247	9.3148	8.54887	6.33487	6.3118	8.09805	8.13642	8.14305	8.72269	1.56084	0.985976
mz_2603.6908	10.8621	9.95942	11.8864	11.419	11.2025	8.63735	10.9007	10.4872	10.8064	12.0135	10.7564	1.34668	0.985976
mz_2120.3891	8.9503	7.70514	8.30038	8.62081	7.59967	6.35567	7.37442	7.73813	9.05808	8.74756	7.88521	1.21744	0.985976
mz_2900.8762	9.94345	8.63989	9.53495	9.95416	9.82793	6.5188	9.44577	9.28147	9.91328	8.82646	9.68694	1.41959	0.985976
mz_2824.0632	12.1214	11.6535	11.4068	12.3707	12.0993	10.4641	11.2294	12.397	12.2583	12.4683	12.1919	1.04858	0.985976
mz_1937.7107	9.94787	4.75341	11.1687	12.0535	6.65387	5.87104	11.2566	12.3575	10.795	10.2571	11.8619	3.34325	0.985976
mz_0528.2662	13.05	12.1946	13.912	14.3552	14.7766	13.2813	12.608	14.2921	13.4	13.5303	13.7012	1.18253	0.985976
mz_2353.4764	5.77382	7.94099	5.34651	6.59749	8.88987	6.94524	10.9397	4.94617	5.1676	7.37411	6.27267	-2.3126	0.985976
mz_0935.5841	15.2745	12.807	14.7899	13.9244	13.5929	14.3535	12.8091	14.9084	14.7359	14.4378	15.4838	1.32023	0.985976
mz_1110.1148	8.59989	5.97123	8.72396	6.90146	6.29208	4.29698	7.36201	7.21143	8.4025	10.275	7.23826	2.07883	0.985976
mz_1861.2921	7.91567	8.83263	6.32178	7.48054	8.6603	9.1345	10.701	8.22093	8.40053	8.46932	8.94525	-1.50427	0.985976
mz_1301.9594	8.03955	4.10901	6.81294	6.59642	8.10619	6.64001	7.36853	7.65648	8.22763	7.85721	7.98268	1.6207	0.985976
mz_1684.1848	10.1364	8.39773	8.3863	10.1149	8.93596	8.04089	8.51121	10.0476	9.43354	9.35569	9.49229	1.17123	0.985976
mz_1483.9556	7.69644	8.9883	7.24248	9.16918	8.0076	10.0617	9.28936	8.09258	7.80727	9.06281	8.44762	-1.25572	0.985976
mz_0591.4395	19.2967	20.2744	19.0936	19.6	18.103	20.1998	19.4247	18.0927	15.69	16.3011	17.8688	-1.96059	0.985976
mz_0734.3722	14.3007	11.1269	13.5031	14.4699	13.6119	12.6032	12.9827	15.5592	14.7353	11.9338	13.5421	1.71939	0.985976
mz_0545.4704	5.54596	12.3071	5.56782	10.3265	10.5226	12.3959	10.1284	6.65135	11.5395	9.33951	8.36368	-3.12835	0.985976
mz_2957.4491	5.18358	8.04651	7.05106	5.56103	6.81476	8.26202	7.84472	8.38479	6.95787	5.89786	6.31167	-1.53075	0.985976
mz_1133.8366	8.93107	8.72549	9.11547	7.59906	10.8811	5.46927	8.0666	9.04452	9.17063	9.35941	9.89351	1.82889	0.985976
mz_1148.7713	9.39757	7.5555	8.82268	8.33999	7.76315	7.7932	7.42873	9.02828	8.31036	8.71432	9.63511	1.15896	0.985976
mz_2505.6693	8.98474	12.3756	10.541	10.2119	11.3806	11.6911	11.4287	11.093	11.0441	7.92644	9.54039	-1.74151	0.985976
mz_0613.1657	7.79441	5.98955	7.51406	7.2562	7.65917	7.5512	5.70065	8.36682	7.03356	7.70074	7.53492	1.19369	0.985976
mz_1160.6535	12.0084	11.9783	12.0183	11.3124	11.5139	9.2081	8.73023	11.6598	11.1759	10.5775	12.2948	1.5979	0.985976
mz_2927.4760	8.98121	7.31541	7.22732	8.74509	8.56779	5.67919	5.10333	7.35657	7.79687	6.74774	6.24364	1.67564	0.985976
mz_2907.8872	7.24916	7.21151	7.6177	8.26203	8.00154	5.05026	5.94221	8.40403	6.67757	6.49144	7.21144	1.42137	0.985976
mz_1951.7264	10.6913	6.1802	11.0349	11.9286	8.105	6.79757	11.4325	12.0076	10.7839	9.77707	11.8534	2.63598	0.985976
mz_1776.1898	10.8612	9.94967	11.4576	10.5945	9.68421	9.13752	9.49583	10.8155	9.97706	11.0213	11.1467	1.16709	0.985976
mz_2307.5515	10.6073	10.7285	10.6025	11.0091	10.5757	11.5309	12.8305	10.1204	9.88278	10.9459	9.38484	-1.30555	0.985976
mz_2198.8417	8.12078	6.82245	5.6588	7.94801	8.41292	7.17945	4.98466	9.20903	8.48925	8.27102	8.30835	1.72342	0.985976
mz_1389.8762	9.9425	10.4347	8.07275	8.50247	9.39351	9.77019	10.4493	8.26148	7.77578	8.85989	9.95864	-1.37219	0.985976
mz_1714.4514	13.1224	10.5833	14.1668	13.3161	10.8412	10.3123	12.177	12.4895	11.4173	13.5004	14.2327	1.86158	0.985976
mz_1853.1931	12.1634	11.5056	11.8146	12.3565	12.4036	10.2316	12.0138	12.676	12.6897	13.227	12.129	1.18215	0.985976
mz_0683.3167	7.37444	4.49916	7.52697	6.40461	8.01823	2.88308	7.9434	6.1894	8.44332	6.55218	7.47025	2.13888	0.985976
mz_2145.6231	8.74898	5.39394	8.59488	9.71705	9.20896	7.64956	6.88011	6.98326	7.87648	7.13617	8.00412	1.64253	0.985976
mz_1496.9211	8.84464	7.65818	8.79549	9.72327	8.58627	7.9352	8.75829	9.35594	9.27592	9.41291	9.37991	1.05457	0.985976
mz_1444.0377	8.18098	6.44184	7.65633	7.85277	7.03485	5.3528	6.51675	6.42345	6.88492	7.1901	7.12257	1.18945	0.985976
mz_0927.5838	7.9971	8.54732	7.13201	7.37574	7.05922	10.5451	7.40361	7.11737	8.16253	7.28053	6.62703	-1.48807	0.985976
mz_0892.7001	8.37882	6.88179	8.10116	8.03398	9.30704	7.48103	6.45809	8.69249	8.86683	6.61949	8.28068	1.34476	0.985976
mz_1843.8933	5.721	7.76883	6.8886	6.5597	7.48915	11.5696	7.23569	5.34828	2.54954	7.50445	7.24048	-2.69539	0.985976
mz_0551.2980	8.99081	9.39302	8.94363	9.07347	9.99738	11.6932	11.3864	10.8026	9.28598	8.9501	8.95268	-1.44963	0.985976
mz_0756.5185	6.91157	8.08664	5.73251	7.99257	5.13733	9.09632	6.93956	6.94109	6.16042	6.9048	6.12519	-1.55266	0.985976
mz_2306.5495	10.3858	10.2503	10.3414	10.5878	10.9209	11.6581	14.2637	9.08256	10.8312	10.4326	9.97336	-1.73794	0.985976
mz_1215.7623	6.92888	8.35452	7.82296	6.19263	6.07288	8.4484	7.68468	6.64459	7.01926	5.74983	8.05784	-1.35143	0.985976
mz_1632.2640	7.81828	5.64757	7.38269	7.42626	7.57604	6.25967	5.61827	5.6447	8.16951	6.41056	7.00177	1.33689	0.985976
mz_0803.5796	9.34745	5.51805	8.89555	8.67589	9.12811	6.01561	8.95214	8.89725	8.06839	9.12439	6.82949	1.79222	0.985976
mz_3142.4299	8.52427	8.50479	8.69065	9.0643	9.08253	7.31023	8.10599	9.38336	9.10177	8.76893	9.3315	1.01974	0.985976
mz_2391.6164	9.37967	6.65573	9.2215	7.9374	6.63965	6.43214	6.60786	7.57325	8.49064	7.29	7.57763	1.44847	0.985976
mz_2390.5096	9.60504	9.13081	10.1733	10.3156	10.0906	8.60791	8.54286	10.1293	9.97127	9.02244	9.24667	1.05876	0.985976
mz_2546.6873	12.6291	12.5052	12.7052	12.3062	13.582	11.17	11.0361	12.6803	12.9508	12.3294	12.4309	1.13133	0.985976
mz_2542.8363	8.11055	6.87349	7.03649	7.86748	7.91689	4.88013	7.60838	7.96091	7.90046	7.34202	8.49443	1.37465	0.985976
mz_0870.6828	12.7945	10.8064	11.9419	12.9879	12.0859	9.94506	12.2248	12.4407	12.8155	12.0731	11.3722	1.32189	0.985976
mz_1868.7420	8.05261	10.1103	8.63149	8.55338	8.9889	10.6396	9.23645	9.53987	9.74761	8.38313	8.25159	-1.2269	0.985976
mz_2643.6783	10.4419	10.8776	8.58341	8.94451	10.167	10.4128	10.7348	9.75939	8.96306	9.92781	8.78756	-1.22821	0.985976
mz_1261.9109	9.08439	7.74199	7.79699	9.37935	8.20579	7.19461	7.18744	8.97719	8.14791	9.41808	7.76602	1.22229	0.985976
mz_1439.2738	8.69742	7.09958	8.38854	8.02989	7.66076	6.20097	5.82617	8.1372	5.7827	7.80732	8.02962	1.4411	0.985976
mz_0816.6195	11.8093	12.433	12.1963	10.3622	11.0814	12.6294	12.3909	11.5042	11.6949	11.3066	11.1531	-1.09592	0.985976
mz_0608.5249	10.2209	8.44422	9.09164	9.44081	10.3014	9.41437	7.80856	9.70899	9.26673	9.49611	10.1796	1.15755	0.985976
mz_2738.7127	8.79031	6.38176	6.81593	8.27889	8.77399	7.83437	6.57472	8.28384	8.80066	7.79133	8.23186	1.29057	0.985976
mz_1771.0627	9.02032	9.3566	9.49713	9.66582	9.2745	8.56127	6.4902	9.36295	9.95918	9.53057	9.44347	1.33322	0.985976
mz_2412.7369	11.0672	10.8322	11.9713	11.7877	11.5247	10.4395	10.9858	12.0811	12.9395	12.2672	11.3947	1.12669	0.985976
mz_1995.4670	7.63478	6.90574	7.29466	6.94084	8.38193	6.88001	6.56999	9.06635	7.78787	8.49189	8.52452	1.23011	0.985976
mz_0612.6289	7.6611	4.83698	6.61714	6.70804	8.32798	6.30677	7.14841	7.27908	7.89009	7.43152	7.60014	1.342	0.985976
mz_1058.7114	6.23966	8.8769	6.60463	7.56118	6.34326	7.79895	9.20317	8.50328	8.41695	7.0207	6.44233	-1.48484	0.985976
mz_1241.8582	8.58488	11.5094	11.0709	11.7257	10.9286	11.2128	12.8793	10.0028	10.5583	8.35507	9.03248	-1.83486	0.985976
mz_1228.0474	7.17926	8.55387	8.03627	6.8049	5.925	8.43745	8.38148	8.0115	5.98089	7.98883	5.43396	-1.53752	0.985976
mz_1218.8271	5.27382	3.77318	7.99021	5.89722	7.98378	5.79657	5.42168	7.98539	7.05119	5.50922	6.48338	1.77463	0.985976
mz_1616.1575	6.48827	6.01858	7.43229	7.64621	7.25499	7.28581	5.07828	7.11474	8.41514	8.08687	7.21887	1.32962	0.985976
mz_1979.3629	12.5297	12.0885	12.8151	12.6751	12.9348	11.8749	11.7485	13.247	13.3836	12.2585	13.2965	0.988603	0.985976
mz_1699.9814	8.21518	7.95986	8.47445	8.21235	7.48496	6.14347	7.49294	8.60925	8.58305	8.44665	8.87651	1.16405	0.985976
mz_1258.9196	10.3243	9.73572	9.94652	10.0338	11.1453	9.0832	9.08757	11.6229	10.6103	9.5327	11.0443	1.23035	0.985976
mz_1771.4266	8.23352	7.43138	8.73052	7.70627	8.09888	7.46022	4.47887	7.543	7.27267	8.31343	7.82467	1.50855	0.985976
mz_0499.1915	9.49777	12.0439	9.98081	7.09417	9.03274	13.0292	8.41196	8.59176	9.09849	8.71554	10.2014	-2.13511	0.985976
mz_2018.4955	7.60278	7.71593	7.40187	7.91995	6.71777	5.41398	4.98698	7.07536	7.27934	7.73519	7.425	1.35569	0.985976
mz_0647.5973	6.06381	7.51009	7.18105	7.29268	6.24059	7.79614	7.67489	6.37949	4.69752	6.9439	5.73595	-1.3435	0.985976
mz_0939.6449	8.73022	7.83866	9.09881	7.97922	7.51803	4.40894	6.32324	9.38266	8.91723	5.61735	8.46813	2.02368	0.985976
mz_1025.8508	9.60028	9.52451	10.5363	10.6206	10.0468	8.41208	6.9678	9.80298	9.79506	8.63637	8.97883	1.4507	0.985976
mz_0859.5960	8.22171	6.83621	9.68509	7.67506	6.6435	7.55745	4.437	7.80103	8.58882	8.77755	7.13195	1.7887	0.985976
mz_2218.3668	7.58348	7.52914	6.39522	8.09295	6.7598	4.71743	5.32767	7.80287	7.10288	7.04176	7.77861	1.46162	0.985976
mz_1553.7680	7.18501	7.01769	5.42232	7.28631	6.7792	11.9901	7.36699	6.83597	7.13787	6.0459	6.63659	-2.12546	0.985976
mz_0936.6547	7.30868	8.56012	6.91637	7.97326	7.66213	9.30465	9.67154	7.91073	9.44053	4.74592	6.21172	-1.9076	0.985976
mz_0707.5232	15.239	19.8151	15.8471	15.4287	18.6404	19.4663	15.2869	15.3791	14.413	16.0732	15.5824	-2.36404	0.985976
mz_0893.6207	8.25901	9.13017	7.5482	7.10775	8.41162	8.82761	9.02451	7.38195	6.48941	6.45855	9.0429	-1.40667	0.985976
mz_1047.7717	7.15035	5.83716	5.57448	7.84917	6.48174	5.70568	4.96239	6.80381	8.0479	5.86045	8.01202	1.47075	0.985976
mz_2177.4005	7.57606	8.81366	8.33849	7.16712	8.36164	8.42511	11.1787	7.20674	7.97099	8.89958	8.39168	-1.48347	0.985976
mz_1509.9219	9.26098	8.14929	9.4645	8.74053	8.78015	8.26839	8.1383	8.74053	9.02062	9.56151	9.64467	0.966356	0.985976
mz_1372.9051	7.54444	8.73232	6.40634	6.71918	8.20942	8.72484	9.09146	7.377	9.01789	7.44075	7.66352	-1.30222	0.985976
mz_1526.3160	8.14529	5.47245	8.29319	7.41642	8.68576	7.71584	7.58192	8.58248	8.40991	8.0355	7.96139	1.26784	0.985976
mz_0289.1646	13.3385	14.8089	12.6053	11.1751	13.0028	15.0785	12.8914	12.5176	13.8003	13.0648	12.8051	-1.47096	0.985976
mz_0907.5881	9.24685	7.23763	9.51606	8.3911	7.65737	6.91296	5.81046	6.14584	8.25547	8.17257	8.45266	1.57605	0.985976
mz_1505.1610	9.0705	6.85899	8.91178	6.74497	8.95436	7.42778	6.93869	7.91462	8.13013	8.67557	8.34018	1.26761	0.985976
mz_1380.3332	7.9886	8.82681	7.90728	7.66377	8.67724	9.00436	9.14934	8.09482	7.07293	7.23265	8.55943	-1.09392	0.985976
mz_1291.8150	8.16186	8.58338	7.264	8.21024	8.38381	9.41589	9.08514	8.24833	7.10717	8.38142	7.87646	-1.07398	0.985976
mz_1284.7799	8.25744	7.96122	10.8231	8.45274	10.3459	7.96986	9.19249	11.358	10.6381	13.522	12.2462	2.33091	0.985976
mz_2160.3977	5.41354	6.06958	8.22234	7.10102	8.51261	6.86931	4.93365	7.35741	7.72817	7.66435	8.38025	1.58995	0.985976
mz_1499.0459	11.0889	13.4534	10.7921	14.081	13.8957	14.5091	14.9101	12.5113	12.3861	13.4976	11.8193	-1.78183	0.985976
mz_2325.4603	8.05314	8.14678	8.09484	6.38236	7.90869	8.4939	10.2727	6.80437	8.45514	6.17846	7.68819	-1.52548	0.985976
mz_1970.4744	8.30421	6.20805	7.65214	7.80773	6.45852	6.50326	7.29607	7.69489	8.84904	8.83966	8.19304	1.30578	0.985976
mz_1172.8922	6.46009	6.67828	5.20624	6.36252	6.95099	9.07785	8.99538	7.91855	7.49667	6.34242	6.75584	-1.56384	0.985976
mz_1526.1058	6.90496	5.15689	7.30298	7.71343	5.17333	5.9946	5.86899	7.04805	6.71986	7.70782	7.48562	1.33352	0.985976
mz_1381.0878	6.90878	7.02658	8.73157	7.7289	8.20471	7.0173	6.88838	8.10497	8.31887	7.98063	8.42895	1.0735	0.985976
mz_1924.6944	9.92363	6.96569	11.1284	11.6946	8.30722	6.49271	11.3192	11.0315	10.2905	10.6443	11.4404	2.29838	0.985976
mz_1094.9199	12.0733	9.67959	11.9782	11.0062	10.3133	11.0944	10.7247	12.8515	11.9678	13.4885	12.9131	1.57441	0.985976
mz_2468.0558	6.84143	7.31659	6.85809	6.39447	6.82925	7.98526	7.93377	7.40552	6.75015	6.82328	6.44714	-0.951541	0.985976
mz_1805.2654	8.07693	7.60408	7.53418	7.58016	8.30541	5.3174	7.76705	8.02365	8.98272	9.25007	9.08421	1.45849	0.985976
mz_1389.2244	11.0204	10.3914	12.2487	10.181	11.0771	9.96962	10.3267	11.6152	12.1521	11.7672	11.211	1.17985	0.985976
mz_0638.3300	6.66797	8.29606	8.06832	5.03534	7.92093	7.96577	11.4357	7.37341	6.63615	8.47099	7.79968	-1.98591	0.985976
mz_0374.3265	13.3365	14.9069	13.2994	12.9455	13.0204	13.5237	14.46	13.6217	12.8794	12.9328	13.9077	-1.05396	0.985976
mz_1195.8782	9.16852	4.87831	6.23584	9.13946	8.31927	6.96657	7.55744	7.78075	8.13206	10.0826	7.73677	1.85697	0.985976
mz_2260.5440	8.05127	5.40724	8.67627	8.54033	8.64913	7.93575	6.96159	8.11106	7.21333	7.32316	8.45388	1.35911	0.985976
mz_1642.1520	7.65359	8.6419	6.13177	6.68457	5.52276	8.96408	9.55396	8.87404	7.88706	6.84775	8.9706	-1.7318	0.985976
mz_1079.8131	11.4369	12.4971	11.9344	11.3169	10.7858	13.7578	11.9631	12.0885	12.268	11.1844	11.3899	-1.18876	0.985976
mz_2632.6649	9.22889	7.6938	9.69795	9.71008	9.36328	7.94033	9.65644	9.7278	9.19305	9.72155	9.78161	1.12284	0.985976
mz_1708.7401	6.89206	6.70236	8.2471	7.32086	5.61323	9.20606	10.1472	5.28091	6.30626	8.17834	6.15836	-1.93556	0.985976
mz_2138.9148	9.5813	9.71728	9.75381	9.67061	9.65014	8.20604	6.53674	9.59466	9.53464	9.74213	8.7192	1.37746	0.985976
mz_1760.1938	7.57367	9.03764	7.95198	7.77689	8.16723	9.84245	7.68525	6.22235	6.84985	8.28536	6.46779	-1.44322	0.985976
mz_2122.3457	11.8746	7.88613	11.1837	9.37457	9.50968	9.7912	10.1661	11.6344	11.0831	10.9189	11.5156	1.60569	0.985976
mz_1799.6215	10.9717	5.56817	11.1678	12.508	8.34212	8.4776	12.0821	12.9364	13.1587	12.3587	11.4564	2.90317	0.985976
mz_1814.1469	6.14037	7.99845	7.1921	7.96432	6.34757	8.05614	8.64656	4.58509	6.07343	7.41474	7.58747	-1.57058	0.985976
mz_2399.5073	8.28985	7.2705	9.01017	9.3404	9.1167	8.93443	7.01247	8.68821	8.39345	9.32184	9.17436	1.17774	0.985976
mz_2884.8222	6.86544	6.57566	6.83425	7.76366	8.79254	4.12278	7.04504	7.5098	8.23705	6.57214	7.41736	1.58454	0.985976
mz_1549.1418	9.52047	8.57742	9.63252	9.71912	9.02563	8.64356	9.36547	10.4692	10.5638	10.5477	10.4559	1.12963	0.985976
mz_0758.4144	13.6153	14.1726	12.6534	13.814	13.5301	14.0759	14.9749	13.116	13.6822	13.4881	13.3711	-0.999011	0.985976
mz_1061.4704	9.62147	8.58593	9.70143	9.45369	9.0092	8.25604	7.15454	8.53391	9.00279	8.5736	8.91577	1.10265	0.985976
mz_2046.4768	11.5595	7.37078	8.46653	9.50105	9.68739	10.1304	6.31213	9.51658	9.95243	9.91344	9.47514	1.82123	0.985976
mz_0855.5204	10.6363	12.1265	11.1299	10.8462	10.026	12.3843	11.1167	8.50842	10.0985	10.4287	11.6581	-1.45932	0.985976
mz_3122.7464	7.3683	5.36645	7.36123	7.41713	7.70668	7.30573	6.79366	7.6673	7.50202	8.05927	7.54404	1.08963	0.985976
mz_1370.0190	13.0274	13.0694	12.255	12.6433	11.6733	14.5563	13.6181	10.7194	12.6699	13.6043	11.9925	-1.4248	0.985976
mz_0885.6284	10.7007	9.03958	9.07053	10.4256	9.28128	9.54029	8.74923	10.6225	11.1981	11.9322	11.245	1.44978	0.985976
mz_1595.0671	7.89918	8.403	5.9675	6.90049	6.88833	7.63382	7.82389	6.42825	6.92969	6.51706	7.22154	-1.10956	0.985976
mz_1854.3872	6.64967	7.98017	4.31368	5.9974	7.30815	7.87487	7.69069	7.5706	7.22996	5.75025	5.13078	-1.60476	0.985976
mz_2414.8912	8.5511	7.91808	8.48613	9.9819	9.39664	5.48191	9.29302	9.6091	9.45622	8.92677	8.9568	1.60624	0.985976
mz_0948.3601	8.52374	8.10313	5.98427	8.97609	7.86961	11.8478	9.40043	7.68537	8.70628	7.83916	8.08771	-1.82475	0.985976
mz_0445.2724	10.5428	9.14787	10.58	9.07858	9.83321	9.46523	8.34882	10.6435	10.0297	10.6777	9.65024	1.14216	0.985976
mz_1860.3496	8.39621	8.01196	9.21556	8.66293	7.51975	7.07409	6.0541	8.60712	7.49134	9.7611	7.93632	1.40207	0.985976
mz_1398.0303	10.0532	10.0933	9.12398	9.71115	8.7119	12.507	9.89614	8.48709	9.12862	9.50558	10.3195	-1.45203	0.985976
mz_1476.1115	5.14059	9.61946	5.3599	6.15081	6.67879	7.15929	6.63885	6.06749	6.17041	6.94671	7.32179	-1.57631	0.985976
mz_1548.0902	8.22901	9.95659	8.6931	7.11901	8.78392	9.40075	10.8046	8.71344	8.40556	8.93843	10.3006	-1.40611	0.985976
mz_0740.3512	10.7587	10.4506	10.5527	11.006	12.1609	10.7424	9.29727	13.0437	11.0657	11.9613	11.8816	1.39041	0.985976
mz_0517.2772	8.71124	10.4621	8.93159	10.5963	10.1289	6.20251	7.13337	10.4066	10.3143	9.22806	9.93654	1.84906	0.985976
mz_0731.5069	8.80125	10.8788	9.38423	9.28667	10.9844	12.0335	11.8313	8.49549	10.735	11.5716	10.4968	-1.61179	0.985976
mz_3001.0668	9.86238	7.27168	9.18698	9.58458	8.72731	7.21089	8.77968	9.47169	8.60425	8.92223	7.80403	1.26635	0.985976
mz_1859.2318	7.98269	9.08772	6.69646	7.76083	8.30205	8.54408	8.60196	7.66815	7.39305	5.22941	7.54121	-1.42286	0.985976
mz_1203.6942	10.1145	10.2256	9.16462	8.41158	8.86285	9.94243	10.3191	8.25134	8.22638	9.19933	9.70611	-1.17028	0.985976
mz_0625.3745	6.74913	5.3782	6.94185	6.66871	8.10944	7.09716	5.92443	7.49906	7.23994	7.70577	7.398	1.15572	0.985976
mz_2761.6032	9.43364	8.87587	10.2618	8.13259	9.43315	7.23651	8.25872	10.0405	9.15051	9.88193	8.85908	1.27546	0.985976
mz_1540.2835	8.13065	7.26775	9.3672	9.15965	9.04589	7.46001	8.19063	8.83831	7.90035	8.6746	8.53927	1.06753	0.985976
mz_1249.8887	8.08155	6.95223	8.21819	8.36167	8.3707	7.04865	4.53181	6.41005	7.90808	8.34529	6.38882	1.58298	0.985976
mz_2258.7772	11.1511	10.2826	10.8484	11.1725	10.6423	9.21263	10.4161	10.6666	11.2128	10.8577	10.9374	0.965668	0.985976
mz_1092.0151	7.93327	9.0504	7.71927	8.35769	8.85242	9.32294	8.83917	7.26173	7.87949	7.51738	8.57715	-1.05854	0.985976
mz_1642.8170	7.01012	7.89246	4.967	7.71988	6.34161	12.455	7.23165	4.6644	8.38903	6.72927	7.66336	-2.50745	0.985976
mz_2798.9979	7.56741	6.65743	8.23381	8.31837	7.91267	6.04614	7.51298	7.34219	7.33044	8.04433	7.59491	1.05416	0.985976
mz_1409.1191	8.87144	7.59456	8.57749	9.68274	8.02112	7.79482	7.52692	8.65125	7.91963	9.17219	8.80457	1.07378	0.985976
mz_0738.4317	11.0932	10.5519	11.5221	12.5416	11.7438	9.98351	11.1862	11.0632	12.3789	11.8345	11.3483	1.11685	0.985976
mz_2114.8524	7.93529	6.79287	6.84453	7.43186	8.31131	6.54555	4.30162	9.04516	6.49559	6.73392	6.94992	1.58843	0.985976
mz_1795.4795	9.74564	6.92244	11.9325	9.37614	8.42797	8.03268	10.9179	13.5454	12.5551	12.0768	13.8017	2.80834	0.985976
mz_2029.0223	6.74736	5.6148	6.44802	7.85328	6.5812	6.26586	6.08515	7.80152	7.79601	6.42388	7.3838	1.14078	0.985976
mz_1689.5398	11.0752	6.20548	12.2521	12.3504	11.0275	6.79959	11.7371	13.2312	12.1777	7.30752	10.4131	2.98195	0.985976
mz_1538.8061	8.51481	8.6493	8.78644	8.89196	8.40663	7.18591	7.16844	8.58319	9.1974	8.75782	8.46573	1.03261	0.985976
mz_1424.6669	8.48995	6.40536	6.5614	6.79812	8.20532	6.73819	3.61442	7.11876	6.31689	7.17283	7.02322	1.62482	0.985976
mz_2165.5096	7.57071	7.39311	8.10522	7.49851	8.50396	6.55637	6.19477	7.5357	6.82549	8.50978	8.60355	1.17936	0.985976
mz_0943.7455	6.48071	7.64286	4.94075	6.93468	4.62698	7.77736	7.01354	4.51072	7.88172	5.65081	5.66812	-1.64111	0.985976
mz_1551.9469	8.24814	5.95226	4.48512	5.4094	8.20097	5.23846	3.60058	6.64143	6.82619	7.73971	7.28669	1.92427	0.985976
mz_0911.6194	11.0469	9.86933	9.07678	10.3632	10.974	8.83327	8.48331	9.922	10.4516	9.71796	10.9423	1.24989	0.985976
mz_1310.8671	7.916	7.97598	8.69012	9.026	8.82778	6.76496	7.28583	8.52522	8.72746	7.38261	8.51961	1.10959	0.985976
mz_1471.0585	8.9912	9.0786	9.49714	8.49896	9.29307	6.87846	7.5721	8.56131	9.17914	9.35375	8.75454	1.17309	0.985976
mz_1455.2045	9.52436	5.35714	5.74053	8.20498	5.68257	6.89986	3.18122	6.72484	8.0012	6.55657	7.60997	2.10956	0.985976
mz_1349.9032	9.84609	9.67092	9.4549	8.00619	9.79978	12.8367	12.915	8.14057	11.3767	11.3162	10.1731	-2.04336	0.985976
mz_2967.4757	8.2882	11.5434	10.604	9.57985	9.90205	11.8365	10.6972	10.6991	11.0552	8.9434	10.3505	-1.43124	0.985976
mz_0710.2548	5.92016	8.30087	4.91764	6.0997	5.70026	8.76906	7.20848	6.01179	9.33067	6.51848	5.70339	-1.81754	0.985976
mz_1340.8976	9.25369	8.06641	6.87118	6.04794	8.31148	4.74028	5.65719	7.42305	8.65688	9.06946	9.08109	1.93472	0.985976
mz_1078.6567	7.37515	8.68188	6.892	6.01036	6.31922	11.4387	6.35289	6.85595	8.05754	6.75233	6.87036	-1.93287	0.985976
mz_0953.5761	9.19762	6.97501	8.99277	8.82771	8.38646	9.01232	7.61767	8.94482	8.9119	9.3198	9.18323	1.10221	0.985976
mz_0881.7205	6.38326	5.78182	6.32399	9.65696	8.8035	6.06673	6.95097	8.19324	8.89158	9.38384	6.96187	1.80827	0.985976
mz_1490.0670	8.36095	8.66435	7.31482	7.85983	6.69453	8.11447	8.95101	6.60457	8.18206	6.5147	7.41563	-1.20822	0.985976
mz_0785.5702	16.5387	17.0312	16.7753	16.4907	16.0256	17.3864	17.601	16.5075	14.7433	14.0603	16.2192	-1.41947	0.985976
mz_2815.8246	7.98279	5.47954	8.85207	9.02394	9.47138	6.54889	7.78212	7.97845	9.17248	5.68587	8.99065	1.79119	0.985976
mz_1292.0223	5.68365	4.46451	7.71619	7.54417	6.6559	7.66788	4.26757	6.66998	7.72299	7.90174	7.39554	1.69462	0.985976
mz_2414.7178	11.423	11.3197	10.9553	12.3221	11.3434	10.2444	10.0327	12.1964	11.5318	11.1596	12.487	1.14508	0.985976
mz_0505.3101	8.25779	10.3172	12.2462	8.49963	10.3806	11.1045	11.6277	8.32019	7.63175	8.58886	8.14123	-2.00817	0.985976
mz_1474.6793	6.14448	7.68708	7.08804	4.86627	4.77505	11.1791	7.94541	8.64681	7.06649	7.7914	7.66653	-2.18158	0.985976
mz_1357.8653	8.83675	7.98284	8.92315	7.58627	7.45456	8.99892	10.6804	8.07881	6.06165	6.55473	6.13612	-1.76672	0.985976
mz_2933.0042	7.50499	7.66336	7.48409	9.15667	7.57647	9.62734	9.95195	6.87646	7.47981	7.38293	8.16935	-1.37704	0.985976
mz_0696.4821	10.1576	10.8967	9.63101	8.93776	10.8271	12.0726	10.6587	10.1782	9.59232	9.80835	10.8635	-1.20985	0.985976
mz_1683.3014	13.4734	9.98578	14.0505	13.523	12.7618	14.6193	10.895	13.7992	12.9872	15.1058	14.6634	1.96217	0.985976
mz_1051.7150	7.88268	7.00008	7.74949	8.01903	8.17321	4.42773	8.08527	7.9836	7.15729	8.54338	9.05522	1.56613	0.985976
mz_3119.0559	7.91684	6.45137	8.2658	6.2232	8.91497	4.97633	7.57117	8.682	7.54054	8.17686	7.18481	1.53017	0.985976
mz_1204.0134	7.59769	5.57589	6.93411	7.39537	7.91145	6.25749	7.54102	8.70704	8.9176	6.80976	8.41357	1.37769	0.985976
mz_0595.3617	7.44938	9.4313	7.86594	9.24432	6.93142	9.166	9.00862	7.7338	7.50648	9.06773	7.86508	-1.24396	0.985976
mz_1565.1086	11.5584	10.8191	9.08662	11.4128	11.4331	7.58341	10.3356	11.9639	11.09	12.7347	12.0546	1.83739	0.985976
mz_0965.4880	7.91386	8.40545	6.21878	6.5233	6.37603	8.07879	8.71776	7.25005	6.55082	7.76867	8.40606	-1.27472	0.985976
mz_2964.0378	9.9102	11.2608	9.72693	9.3997	9.78018	11.0069	10.6778	10.0982	10.9272	9.59178	10.3484	-1.00901	0.985976
mz_1822.4852	7.80233	6.69334	8.60203	7.6707	6.6449	6.13024	7.62649	8.8806	8.24226	9.68782	8.25394	1.40638	0.985976
mz_2885.8629	10.6206	11.1522	11.2074	11.7005	11.3979	10.0744	9.13823	11.5571	11.8971	10.8703	10.9222	1.15001	0.985976
mz_0770.5083	11.7488	8.07249	9.83818	9.35157	9.8165	10.1947	9.1785	11.5178	14.7858	12.5686	12.2427	2.3352	0.985976
mz_0920.6234	5.2544	7.93679	5.89737	8.23179	6.83072	8.49385	7.88181	7.41623	7.37113	5.17881	6.51885	-1.51674	0.985976
mz_0805.3781	7.09352	7.2719	9.62753	10.1798	6.17621	6.29235	6.96771	9.14417	8.90658	8.4927	9.49515	1.79547	0.985976
mz_2210.5953	8.31164	4.488	7.61701	6.78466	7.02623	7.21173	6.71459	7.35765	7.64011	7.8675	7.19403	1.33675	0.985976
mz_1171.8999	6.61908	7.3923	6.12822	7.52501	5.1353	7.5231	8.91787	7.23056	5.65931	5.24804	7.7553	-1.53182	0.985976
mz_2011.7401	7.97429	6.91049	7.94664	8.15282	8.23892	6.38948	8.44995	8.51519	8.57462	9.79906	8.95352	1.26941	0.985976
mz_1446.9460	14.7283	13.5648	14.3539	14.5191	13.1886	12.3038	13.7743	14.127	14.4067	14.9447	14.4897	1.13045	0.985976
mz_1202.0318	7.42432	9.34363	8.89051	7.28266	6.66804	9.51799	8.82947	5.91195	9.03721	8.77351	7.42432	-1.5538	0.985976
mz_1728.2252	10.4491	10.4046	10.4238	11.6593	11.7877	9.19299	11.0559	11.422	12.4355	12.4434	13.2819	1.52002	0.985976
mz_1674.2146	10.5513	2.81989	11.8134	8.38571	6.50826	10.807	5.00976	10.2794	7.84282	14.1073	11.1967	3.87341	0.985976
mz_1783.2757	9.57744	7.77592	8.78403	9.07739	10.2739	6.35192	10.694	11.0234	10.51	11.2524	11.3516	1.95732	0.985976
mz_0579.3667	10.8465	9.61105	10.4709	10.9754	10.5393	8.70027	9.80222	10.0865	9.91836	9.67196	10.8918	1.05391	0.985976
mz_1078.8104	15.661	15.7434	14.5991	15.4322	14.5397	16.9424	15.8369	14.4411	15.092	15.7877	15.1023	-1.09235	0.985976
mz_1875.3077	9.25331	9.10226	8.82416	9.11633	9.94663	9.74202	11.4216	6.95779	7.91347	7.84783	8.45432	-1.5494	0.985976
mz_0990.6852	7.55992	9.2635	7.03127	8.47451	8.00446	8.6292	8.48505	8.44811	7.21101	7.68704	7.51805	-1.05079	0.985976
mz_0614.2572	6.16981	10.9681	10.1446	6.0688	10.8203	10.6232	9.59021	5.58589	6.25235	6.31266	10.0156	-2.72258	0.985976
mz_1533.0656	6.83727	7.1076	6.80834	7.84265	7.71585	4.22668	6.80084	8.20529	7.52837	7.3162	7.21395	1.38845	0.985976
mz_0582.4011	9.751	8.68266	9.15252	9.93185	8.82274	7.62384	8.48223	9.51267	8.95824	9.10955	8.90397	1.00491	0.985976
mz_0681.4947	9.03031	9.8763	10.3456	8.20537	9.54738	6.51687	8.02873	11.6216	9.45091	12.1264	11.983	2.14819	0.985976
mz_0787.6116	8.76379	7.16063	8.55439	8.13961	6.71988	7.42753	6.93438	8.34503	9.04833	8.52168	8.57812	1.15967	0.985976
mz_1111.5214	6.60916	6.8521	7.17306	7.10591	5.06011	8.29306	8.66602	6.42529	7.35592	6.96601	6.2924	-1.31358	0.985976
mz_1890.0011	7.66882	8.72027	7.85041	6.65277	7.82538	8.68488	8.33796	8.27653	7.08384	7.53672	7.71521	-1.00483	0.985976
mz_1033.7103	10.4449	11.6087	11.1593	10.9731	9.24585	11.518	11.5536	10.9497	10.5293	10.5645	9.60685	-1.12589	0.985976
mz_1966.7413	8.35844	5.94706	11.0134	11.8749	7.70263	6.04751	11.3741	13.0045	11.0482	11.4013	11.2149	2.91272	0.985976
mz_2398.4995	8.02183	7.68555	8.61276	8.6221	8.5504	4.34573	8.40161	7.8249	8.72334	8.32484	8.64285	1.60442	0.985976
mz_1308.8541	9.40511	9.8352	10.9104	8.5167	10.9433	12.0202	12.7583	9.09608	10.2576	10.2893	10.174	-1.58881	0.985976
mz_1363.9275	7.60039	8.88297	7.82375	7.23645	7.82997	8.59401	9.33562	8.31034	8.30869	8.43009	8.19897	-0.970205	0.985976
mz_0921.5576	10.1094	8.44052	9.05332	10.6901	10.6511	10.1636	8.92757	10.739	10.9624	10.173	10.6623	1.20286	0.985976
mz_0863.6912	8.36786	6.98926	7.33745	6.70411	8.54061	6.33973	6.549	7.50843	7.62228	8.33197	7.44785	1.10657	0.985976
mz_1086.8671	13.3885	11.519	12.5137	11.791	11.7997	10.5069	12.4845	13.0677	12.9731	13.1999	13.6678	1.29672	0.985976
mz_1286.7877	10.6001	9.219	10.2134	9.76971	10.284	8.10959	9.61157	10.1086	9.30141	12.525	10.5773	1.4424	0.985976
mz_0666.5303	15.3143	16.775	15.6932	17.1161	16.6957	17.2006	17.1518	16.2111	14.654	15.442	15.0733	-1.26751	0.985976
mz_2384.1748	10.0103	9.09779	9.92441	10.0902	9.78446	7.36549	10.2169	10.6357	10.3992	9.88845	10.3897	1.2469	0.985976
mz_1143.8774	11.9008	10.9669	10.2942	11.5319	11.6883	9.58286	10.2913	10.8966	12.351	11.5796	11.3218	1.16515	0.985976
mz_1011.5693	10.4821	7.71827	8.25197	6.9242	7.32473	5.23422	6.48821	7.68364	7.54642	8.37494	8.83662	1.69784	0.985976
mz_0819.4055	8.0423	10.4737	7.49807	5.80216	7.77745	14.0529	6.53669	8.7511	8.97641	7.49833	6.79964	-2.71126	0.985976
mz_2093.5037	9.34395	6.56984	8.95766	9.56975	9.317	9.20347	8.8026	10.3347	9.32009	9.14046	9.89924	1.29339	0.985976
mz_1309.8620	6.54727	9.15271	8.10661	6.3683	7.22604	8.5837	7.08365	8.06389	6.3808	5.94299	6.09479	-1.43202	0.985976
mz_1250.9720	8.2835	4.52494	7.729	5.15155	7.30144	7.24825	5.22205	8.375	6.66925	8.30489	7.26485	1.71986	0.985976
mz_1514.0796	8.09001	7.33665	8.27217	7.76047	8.13293	7.17817	5.35408	7.69021	8.30031	7.44448	6.85649	1.19542	0.985976
mz_3116.0664	7.40086	4.82989	7.06494	7.25634	6.59184	6.10724	7.39831	7.57484	8.0839	7.0337	8.15612	1.28351	0.985976
mz_2195.5581	6.79603	4.89721	6.07885	6.10417	8.17607	6.77777	5.88606	7.48091	7.62231	7.74135	7.48486	1.33189	0.985976
mz_1373.9241	8.41007	7.64419	7.4723	7.70513	8.92045	5.57427	7.94664	8.1354	8.59678	9.34005	8.50013	1.33001	0.985976
mz_2491.6579	5.87961	7.95958	5.79414	6.81787	8.32699	8.91495	7.31865	7.3271	5.38078	6.79408	6.69314	-1.43768	0.985976
mz_1417.9110	15.8974	14.9555	15.5997	15.8585	15.6255	14.1299	14.5104	15.6194	15.6854	14.3665	15.7353	1.01655	0.985976
mz_1473.9642	13.2666	12.9316	13.1102	13.1561	14.1537	10.9518	12.5339	13.4985	12.6375	13.5988	12.9473	1.15698	0.985976
mz_1268.8844	7.92605	8.43413	7.7857	9.34508	8.21902	9.56895	11.0822	7.19193	8.09271	8.99848	8.78755	-1.40177	0.985976
mz_0819.3691	8.74416	6.36716	6.57126	7.05054	6.669	7.34981	4.96089	7.81545	7.65355	8.57371	8.71743	1.49844	0.985976
mz_1493.3582	7.52336	8.35529	7.32864	7.47472	5.83383	8.72587	9.00419	9.12842	7.61375	6.86151	7.09917	-1.33719	0.985976
mz_1174.6817	11.3197	11.4078	11.6908	12.7788	13.6641	10.3053	12.1398	13.6594	14.1169	11.9434	13.9445	1.60541	0.985976
mz_0915.6403	7.10426	8.56976	6.80365	7.73302	7.69984	8.30905	7.99972	8.05587	6.95412	7.28876	6.37401	-1.04115	0.985976
mz_1962.2992	7.6816	5.28418	8.07713	6.03693	8.22566	5.78035	6.38734	6.7779	6.87338	7.26129	6.028	1.30295	0.985976
mz_1454.9470	9.16932	8.6227	8.96417	9.14582	9.81751	7.69531	8.46558	9.29126	9.09471	9.28992	8.75965	0.930349	0.985976
mz_1102.8268	6.84428	3.70711	8.13264	6.62862	6.95897	5.93631	7.37587	7.40166	7.54365	8.3098	6.36318	1.59975	0.985976
mz_0667.2126	13.7479	8.63561	13.197	14.0112	12.3049	8.61338	12.5482	12.8607	9.13968	10.7239	15.105	2.70386	0.985976
mz_1717.7467	8.54236	6.68567	8.86688	7.04315	8.16746	8.33525	6.82081	9.227	8.76519	9.17572	8.56267	1.26323	0.985976
mz_1070.8511	8.14814	8.81545	8.17046	8.61257	6.64004	9.22699	9.28986	7.13687	7.9373	6.79626	9.09284	-1.29395	0.985976
mz_1967.7637	10.3482	6.19649	11.2632	11.8899	6.25634	5.70625	10.9481	12.0109	10.5504	10.4475	10.7883	2.8274	0.985976
mz_1044.6863	12.9851	14.7351	11.6086	14.7529	12.636	15.5357	14.1564	13.4075	13.9294	10.8312	14.2154	-1.76328	0.985976
mz_2287.2919	10.9539	8.71585	10.2205	10.4973	10.5072	10.3171	8.60041	9.51767	9.78277	10.4991	10.8562	1.14323	0.985976
mz_0825.5752	7.79446	6.74023	7.57808	7.91753	7.92567	6.93596	7.15214	8.26007	7.76987	7.96195	7.3216	0.873377	0.985976
mz_2500.6403	8.94244	9.58209	7.46239	7.44077	8.1695	9.82929	9.50305	9.53741	9.33449	6.51143	8.22377	-1.43537	0.985976
mz_0878.6328	7.71552	7.59259	8.37103	8.45308	8.56702	7.85443	6.7575	8.64187	9.06248	7.8684	8.56255	1.00374	0.985976
mz_1997.2718	5.69563	6.4391	5.3916	4.56699	4.2894	7.3034	8.08193	7.20714	7.68134	4.25355	5.11286	-1.75	0.985976
mz_0854.6141	12.8182	13.4492	12.6285	9.86263	12.0715	13.301	13.0579	10.3634	12.8049	11.8819	11.7268	-1.4996	0.985976
mz_1566.2991	6.51981	9.20261	8.63503	8.24918	9.13518	8.89771	9.37414	8.19122	6.80546	7.11654	5.30304	-1.66372	0.985976
mz_2815.0139	5.0028	8.54873	7.06224	7.42481	6.5609	7.71819	8.84626	6.05009	7.9799	7.4974	7.84154	-1.4436	0.985976
mz_1239.8996	8.89058	7.72101	8.56604	7.18308	7.16585	5.15151	5.79892	7.44123	7.75396	8.89481	6.32738	1.55405	0.985976
mz_2105.3293	7.85989	6.79519	7.39814	7.15886	7.25952	5.67212	6.3318	7.47488	8.65671	6.12427	7.73183	1.19165	0.985976
mz_0885.5556	10.4864	12.6037	9.85009	11.9884	11.7131	13.1107	11.9137	11.071	10.3962	12.1699	11.9973	-1.33366	0.985976
mz_1110.8883	13.0859	12.539	12.7818	11.6528	13.303	11.2586	11.8275	12.8234	14.8114	14.0519	13.611	1.39013	0.985976
mz_1364.1594	9.83059	7.24199	7.80718	5.57905	8.2996	7.45958	2.40228	8.46398	7.64447	8.52788	8.18228	2.3406	0.985976
mz_2007.4822	6.92378	8.17787	6.94575	7.12259	7.88512	7.81284	8.25903	6.76007	7.2002	7.35422	7.24866	-0.903197	0.985976
mz_1182.7792	7.67091	9.17156	9.46986	8.75545	7.71802	9.35028	9.02431	8.05585	7.72883	7.51097	7.35221	-1.14929	0.985976
mz_2362.4995	7.92196	8.06452	7.78672	8.77562	9.42337	5.97984	6.74216	7.94794	8.17694	7.16794	8.53173	1.28769	0.985976
mz_0722.3640	10.1182	11.2666	9.1101	10.7137	9.83707	11.3003	11.0784	10.6015	9.49922	10.6346	10.69	-1.06457	0.985976
mz_2826.0789	11.6604	10.4006	11.3621	12.3474	9.80436	10.4777	10.7305	12.7514	12.5199	12.4338	12.2467	1.35449	0.985976
mz_1511.3324	13.9326	12.6394	13.0842	13.3589	13.4155	12.7759	11.8836	12.9895	14.1381	12.9711	13.4125	0.979822	0.985976
mz_1133.8449	8.73046	11.1103	10.3691	10.3011	11.419	11.1475	12.146	10.6483	10.7428	9.22566	8.46594	-1.48014	0.985976
mz_1815.1253	8.79436	7.76995	9.6514	9.46787	9.59547	7.57059	9.39647	9.84038	9.01758	9.14605	9.12288	1.08383	0.985976
mz_1075.9838	8.16048	7.17252	8.09918	8.46494	9.13229	7.47509	7.25404	7.37894	10.0352	8.30262	8.43513	1.20055	0.985976
mz_2277.6059	8.5749	7.69743	8.41106	7.53384	8.23578	7.45578	6.27069	7.52273	8.54778	8.5665	8.12232	1.04807	0.985976
mz_1885.7589	8.98423	11.8477	7.48124	9.99204	11.2367	11.9347	9.35134	9.62013	9.67499	7.29248	8.91166	-1.89539	0.985976
mz_1826.3586	8.99157	7.78902	8.98479	9.31997	8.72818	7.54916	9.36405	9.71428	9.47529	9.5257	10.3872	1.1568	0.985976
mz_0557.4540	9.63112	8.28025	9.23907	8.51163	9.63451	7.53843	8.57658	9.14761	9.32875	8.66119	8.79621	0.987011	0.985976
mz_1316.9367	8.02247	8.42248	8.9056	7.84699	9.05838	8.45785	5.44443	9.258	9.27371	9.64106	9.99106	1.55807	0.985976
mz_2134.8846	12.1373	9.69198	11.7344	11.587	11.9041	11.2576	11.3327	11.4393	11.5866	11.6643	12.24	1.02587	0.985976
mz_1873.2921	9.17393	8.95566	9.05412	8.64414	9.17304	10.6711	10.5501	8.23143	9.17332	9.4485	8.9757	-1.07466	0.985976
mz_1680.1888	10.0282	8.90923	9.16755	8.96166	10.0255	7.97119	6.65849	8.59326	8.80405	8.01179	9.96727	1.34862	0.985976
mz_0468.3085	13.9083	14.5626	16.8972	13.6823	13.393	16.5594	16.7958	13.2598	14.5095	14.43	14.1642	-1.69203	0.985976
mz_0941.5862	6.69484	10.2979	6.61085	6.21998	7.31902	7.94836	8.44564	8.20268	4.53465	8.85592	7.82258	-1.86475	0.985976
mz_1759.4220	9.31357	7.23295	9.99422	8.56761	6.88875	6.71788	5.09124	8.98198	7.05581	6.05105	8.91661	1.87384	0.985976
mz_0801.5616	9.47059	7.21222	9.00483	10.1767	9.32211	8.23755	9.3242	9.53261	8.65493	9.86889	9.24586	1.15158	0.985976
mz_2123.4337	7.8551	7.69117	7.73084	7.82566	8.10377	4.89485	6.82719	8.60798	8.06771	7.29668	6.83659	1.31947	0.985976
mz_2872.8950	9.76468	8.61622	9.82903	10.2176	8.07911	9.21369	6.78049	9.29883	10.3766	9.28088	9.70541	1.36555	0.985976
mz_0943.5364	9.17123	10.4795	9.72669	10.5991	9.23647	10.1047	11.3871	9.69627	9.2004	8.45636	9.99218	-1.14723	0.985976
mz_3011.5082	7.13203	6.92211	6.86345	7.8721	5.91596	5.41007	5.62601	7.02442	7.87118	7.03604	7.65178	1.18481	0.985976
mz_1511.3398	10.7042	11.5884	10.6197	11.9996	11.9994	10.3786	6.26234	11.994	12.3516	10.4464	11.5014	2.04225	0.985976
mz_2960.5097	9.19842	7.12971	9.19633	9.10727	7.95654	7.6495	7.94507	8.36955	8.49761	8.21626	8.13847	1.0103	0.985976
mz_0834.5079	10.0251	8.68234	9.83458	8.93912	8.04628	8.21869	6.7671	8.73219	8.54196	9.40505	9.82555	1.27935	0.985976
mz_0818.5917	11.2838	12.7384	8.26335	13.3195	11.144	12.9832	12.8363	10.7117	11.6237	11.2867	11.1665	-1.75273	0.985976
mz_0466.2939	11.1258	12.197	15.4081	11.0481	10.298	15.0687	14.691	11.1101	12.1616	12.3095	11.0599	-2.17044	0.985976
mz_3128.4142	5.99611	8.76623	6.71352	6.1028	7.0733	8.81726	9.27605	8.56829	8.92255	7.74232	8.40015	-1.5133	0.985976
mz_1865.0893	9.92014	8.98203	9.52	10.1314	9.34509	6.98134	8.77537	10.1153	8.90007	9.22124	8.5586	1.21774	0.985976
mz_1498.0429	6.96348	10.3051	9.66172	10.3862	9.2902	10.5378	10.265	7.89314	8.11705	7.9165	10.0238	-1.58779	0.985976
mz_1564.0799	7.57206	8.13309	7.96734	5.48295	7.19472	9.21619	9.24515	5.7697	6.83722	9.56542	7.03692	-1.68652	0.985976
mz_2159.5718	8.47655	6.31853	7.95396	8.65395	8.51851	5.06424	8.67229	7.71781	8.66402	7.08683	8.34536	1.4921	0.985976
mz_0925.5777	13.2712	14.4484	11.6592	12.833	13.3625	13.3314	13.1291	12.1863	11.8043	12.7064	11.8383	-1.17863	0.985976
mz_1700.4804	10.781	10.5849	12.648	12.411	11.5675	8.6345	11.6266	10.8287	11.436	12.0693	11.9825	1.43351	0.985976
mz_1710.1994	9.01581	8.01884	8.61158	7.06668	7.97249	7.64289	6.15799	8.6201	8.84347	9.50582	8.90015	1.29377	0.985976
mz_0678.2498	12.6791	11.6932	11.4382	11.8704	11.7204	8.1523	10.9892	11.7828	10.6977	12.4356	11.8506	1.53111	0.985976
mz_0494.3252	14.1751	14.1396	18.6565	13.9327	13.8564	18.8254	18.671	13.3761	13.9928	15.2398	13.0319	-2.67936	0.985976
mz_1602.2627	7.76978	7.13877	8.67489	7.31325	9.01869	7.87701	7.15703	8.26346	9.52525	9.77085	8.81214	1.2526	0.985976
mz_0946.6109	8.52102	7.42735	9.23576	8.88858	8.3583	8.42121	8.08898	9.59831	9.5952	9.73102	8.40799	1.06284	0.985976
mz_1884.9938	8.41525	8.93512	7.65108	8.28219	7.45892	8.8139	8.88109	7.40347	8.81746	7.58862	7.31943	-1.00965	0.985976
mz_2584.2887	8.99499	8.42502	9.29173	9.0828	9.45548	7.47723	6.84044	9.06878	8.68344	7.90558	7.62595	1.18269	0.985976
mz_1479.1317	7.57648	5.61983	7.42923	7.02445	6.0269	5.96963	4.85581	5.72725	5.92622	9.17631	9.37818	1.80137	0.985976
mz_0999.8022	5.91186	7.76848	6.7075	7.14387	6.52888	7.89214	7.16482	4.80453	6.52206	7.39242	6.07637	-1.22254	0.985976
mz_3027.0308	9.76146	9.67197	9.75134	9.6267	9.82368	8.05508	8.44386	10.1375	8.93096	9.88237	10.0954	1.02754	0.985976
mz_2819.0241	8.8302	8.22255	9.18354	9.03069	8.46015	7.2099	7.56047	9.20635	8.61124	9.18157	7.44229	1.07895	0.985976
mz_1002.8695	6.45262	7.87931	7.12508	6.10015	6.57761	7.69112	7.99059	7.43345	7.29322	4.56965	6.87899	-1.29982	0.985976
mz_1578.0267	13.5964	13.4244	14.0231	13.3278	13.2003	9.30927	13.6719	14.6279	13.7489	13.9597	15.2566	1.8324	0.985976
mz_2190.9236	6.05308	7.22251	8.04436	8.48869	8.18247	6.70132	5.47027	7.83394	7.13459	8.52941	8.09478	1.33047	0.985976
mz_1479.9478	8.94927	6.47436	8.39059	8.76361	7.31144	7.03502	7.63295	10.1075	7.45866	8.03292	7.99307	1.32844	0.985976
mz_1008.8103	12.1784	12.304	12.3818	12.8412	11.8529	10.2551	11.1588	12.6531	12.1258	11.9889	12.4358	1.06791	0.985976
mz_1279.8582	8.45746	6.21065	8.22827	9.43723	8.18189	7.36528	7.87123	7.46529	7.7989	8.09742	8.76591	1.15499	0.985976
mz_0943.4074	11.5994	14.2441	10.5959	11.9238	12.9472	15.7736	11.6462	12.8297	13.5872	9.09059	10.8697	-2.20754	0.985976
mz_0623.3167	10.1852	10.2323	9.22456	10.4105	9.67386	11.1369	11.1518	9.48054	10.5854	9.39536	9.61464	-1.01908	0.985976
mz_2527.6579	9.29756	11.0542	8.49648	9.08075	8.2872	9.6838	9.48526	9.72682	9.46466	8.03679	9.00223	-1.15036	0.985976
mz_2388.1968	13.7254	12.6409	13.39	13.4278	13.6787	11.5822	12.9881	13.4366	13.2986	12.6158	13.4813	0.978041	0.985976
mz_2822.0323	11.0685	9.11078	9.9274	11.0856	9.95733	10.8341	7.35067	10.2793	10.9273	10.2105	10.6014	1.40864	0.985976
mz_1597.7772	9.10777	7.81154	8.26305	9.40054	9.88686	8.59169	7.46912	9.46776	9.21452	7.9356	9.39686	1.12667	0.985976
mz_1631.4701	8.19215	7.20376	8.03615	7.28395	7.4323	6.18281	7.09283	8.12796	8.02563	7.18968	8.13621	0.976535	0.985976
mz_1863.1100	11.6096	10.8641	12.4052	11.8276	12.2441	10.9162	10.9147	11.9639	10.7237	12.2169	12.0798	0.985524	0.985976
mz_0758.3968	12.6487	11.9597	11.494	13.3041	14.4228	10.6203	11.9016	12.0908	13.3536	12.5407	12.8122	1.33947	0.985976
mz_1560.1942	7.40228	4.55872	5.636	7.12204	7.26196	5.7376	6.90998	6.3328	8.61173	7.26548	7.94739	1.46203	0.985976
mz_2968.0691	7.5252	4.01115	7.71172	7.6289	7.098	7.50134	7.38582	8.42882	7.67567	7.87596	8.59623	1.51813	0.985976
mz_1309.8770	8.59514	7.78541	9.60121	8.61846	9.45348	8.086	6.50331	7.05999	8.88062	8.44423	9.44166	1.30361	0.985976
mz_0967.4673	9.0315	13.4242	8.72772	10.7771	7.61734	14.4739	7.94235	8.84976	11.7667	7.3218	9.28496	-2.7747	0.985976
mz_1764.1534	8.68008	6.7074	7.04916	8.31131	6.86355	7.71636	6.20171	8.35512	8.76574	9.27318	8.09031	1.2984	0.985976
mz_1329.8452	6.70039	7.77878	8.08616	5.55929	6.44882	8.35451	8.51159	7.89353	5.78368	7.93038	5.34878	-1.49608	0.985976
mz_1044.3812	7.87045	7.0421	7.24913	8.0227	7.50634	6.7297	6.12777	6.95353	8.14091	7.15945	8.87339	1.08879	0.985976
mz_0570.3637	8.28713	6.81559	9.13953	8.58215	8.83977	7.11747	8.38426	10.3011	7.79759	7.75405	10.0051	1.3992	0.985976
mz_2831.3457	7.50492	4.10939	8.4509	7.04882	9.15598	5.40659	8.01536	5.76871	7.16832	8.06791	8.21241	1.82846	0.985976
mz_0972.6172	7.96235	7.13862	8.43336	8.85642	8.70531	6.72526	7.73667	8.13483	8.30676	7.30639	7.91971	1.00296	0.985976
mz_2842.2100	7.13286	6.66145	7.7759	6.05706	8.20569	6.29521	5.18483	7.5881	6.44872	7.34809	7.37284	1.194	0.985976
mz_1009.8096	13.2212	12.5303	13.0656	14.0325	12.7437	11.1747	12.4394	12.9215	13.3515	12.8444	12.529	1.04055	0.985976
mz_1985.8721	12.1667	14.9972	12.7816	13.002	14.8479	15.4136	13.4898	13.5842	13.7324	11.8279	13.5213	-1.45053	0.985976
mz_1613.1715	10.2357	11.5407	9.0679	8.44641	9.96237	10.4117	10.9817	9.08212	10.4092	9.66856	10.9474	-1.25059	0.985976
mz_0935.4892	8.05189	9.82611	7.94597	9.34859	7.27687	10.4571	9.5817	9.48899	9.66437	6.56875	9.15954	-1.51683	0.985976
mz_2575.1705	9.86888	8.8614	9.63524	10.6964	7.73783	8.47367	7.89438	10.4002	10.3247	9.87548	9.29677	1.31961	0.985976
mz_2348.6998	8.63337	6.8086	7.8714	8.46393	8.10734	7.01852	6.94466	7.45106	7.71939	6.89179	8.39879	1.01821	0.985976
mz_1071.4912	10.0687	8.00535	9.07169	9.64132	10.7931	8.42816	9.54126	10.2957	9.07078	9.41775	9.97933	1.13404	0.985976
mz_2541.1839	8.76972	10.5141	7.58239	10.1463	8.82009	10.1051	10.4682	9.96973	9.25736	8.9227	9.73319	-1.21229	0.985976
mz_2892.8848	7.9848	6.69104	8.03295	8.16019	7.40051	6.84294	6.50096	8.20329	7.45604	7.71498	6.51365	1.00499	0.985976
mz_2363.7080	8.71889	7.55693	7.35167	7.95802	8.09812	5.85644	7.37847	8.46012	7.81863	7.64482	7.96996	1.07191	0.985976
mz_2540.6978	8.18833	7.35727	7.22308	8.62267	7.59412	6.65967	7.00937	8.20073	8.14129	7.46225	8.50248	0.9831	0.985976
mz_0440.3007	9.52261	8.2752	9.61372	9.58208	8.56995	8.23786	8.67836	9.54522	8.9398	9.94022	8.98606	0.940319	0.985976
mz_0963.7271	7.87756	8.30815	7.13781	7.65181	7.78753	9.36401	8.6537	7.87947	8.83628	6.37876	5.74659	-1.36331	0.985976
mz_0940.4723	9.549	10.8539	10.2819	10.0658	8.78981	10.1361	9.82552	7.38436	6.91461	8.15286	8.30937	-1.59087	0.985976
mz_0551.2956	9.65066	8.74597	10.3768	9.25367	8.18293	8.2312	7.26234	7.94404	10.1758	10.8781	9.77733	1.45007	0.985976
mz_1147.7301	9.47766	9.85133	10.1605	9.66351	9.21453	9.61309	11.8271	8.93251	9.13339	8.26707	8.57861	-1.25205	0.985976
mz_1726.4514	12.3701	9.54379	12.9997	12.5642	8.18387	7.6855	12.0072	12.4245	12.9349	12.2801	12.6228	2.302	0.985976
mz_1287.9535	9.63934	7.16565	8.10025	9.44418	7.82113	8.39447	6.37845	10.1588	8.5457	8.81301	7.45911	1.43483	0.985976
mz_1151.8237	6.6983	5.58696	7.49601	7.37892	7.8199	6.18299	6.63398	7.21553	7.36734	6.12394	7.14203	1.0206	0.985976
mz_0595.3718	8.74639	5.13558	7.6629	7.1459	8.9374	7.83241	7.38006	8.0158	7.40968	8.61629	8.95787	1.40384	0.985976
mz_0799.3085	9.03732	8.16564	3.47378	5.19912	7.61769	12.6513	7.10095	5.84592	8.25528	6.0607	6.9961	-2.74522	0.985976
mz_1465.9838	10.1439	9.78205	9.72342	10.4362	9.73444	8.41745	8.5068	9.44237	9.30604	10.1491	10.4531	1.02146	0.985976
mz_0571.2889	15.5771	15.6365	20.8678	15.1563	14.7082	20.5321	20.244	15.5918	15.8677	14.2062	15.1453	-2.91415	0.985976
mz_2858.0687	8.17986	7.92215	8.14844	8.71047	8.1636	7.6087	6.56596	7.68075	8.64851	8.56935	8.54061	0.964595	0.985976
mz_1666.4596	8.16184	5.00379	6.92595	6.29504	8.13185	7.9027	5.38966	8.29506	7.34048	8.66304	7.06916	1.51159	0.985976
mz_1506.1875	7.57529	6.27764	6.91658	6.45172	7.68388	6.85627	6.57803	8.9966	7.97681	9.47455	8.48073	1.37387	0.985976
mz_1321.9880	7.07359	6.74093	6.19463	5.55922	6.59976	7.65783	7.39989	6.43973	6.43397	5.82485	6.22014	-0.972978	0.985976
mz_1115.6446	8.10924	7.74744	8.00207	7.82318	8.20828	8.00373	4.94719	7.71624	10.6957	8.68841	9.55345	1.70011	0.985976
mz_3129.7409	9.18941	7.92205	9.23187	9.47436	9.23328	6.54549	9.36556	8.53056	9.79792	8.42894	9.87575	1.27589	0.985976
mz_1408.9936	12.0303	11.5816	12.0121	11.3767	11.3652	10.9728	10.6911	12.4719	12.4892	12.3891	12.2179	0.962222	0.985976
mz_1897.7600	7.98726	7.62164	7.07453	7.20006	8.57226	6.557	6.10388	7.51236	8.22188	7.97534	8.08928	1.06828	0.985976
mz_0735.5534	8.94966	7.09511	7.97921	8.40169	8.49682	7.82503	8.36096	9.31241	8.90613	9.62765	8.70658	1.03715	0.985976
mz_2942.0171	7.81103	7.58828	7.93664	6.31218	7.97561	9.08653	9.40181	6.94054	8.12921	6.28363	7.86611	-1.28534	0.985976
mz_1099.5296	3.83652	7.98677	6.4572	6.75212	7.61822	10.0192	8.28754	6.04398	7.96626	8.77686	7.24057	-1.92804	0.985976
mz_1510.0592	9.58512	12.1604	11.7979	12.7723	10.0506	13.3691	12.0674	9.8618	11.1413	11.4202	7.36839	-2.03259	0.985976
mz_0515.1735	10.3365	8.89066	10.7373	9.7837	8.4175	5.73285	9.53223	9.35678	9.81736	9.29201	9.63759	1.62044	0.985976
mz_1776.0290	8.16189	7.02567	8.60255	8.98515	7.96166	6.95254	8.03914	9.27061	7.48246	7.99698	9.40842	1.1446	0.985976
mz_1103.4528	14.6949	14.4687	14.4072	14.5915	15.0199	10.5918	14.1948	14.965	13.8508	14.6772	14.8337	1.54491	0.985976
mz_0853.5835	9.04581	10.123	8.82072	9.21755	6.10633	9.60645	9.78379	8.84443	8.11451	8.32636	9.1869	-1.37993	0.985976
mz_2628.7428	9.69614	8.60417	10.2296	9.96354	9.65464	7.63634	9.47225	9.85277	8.4925	10.0831	9.51004	1.11437	0.985976
mz_1760.1998	6.34856	9.26911	4.89599	7.10882	7.02674	8.71597	7.51613	7.82792	7.46496	8.57287	6.52276	-1.52933	0.985976
mz_0859.7514	10.1277	7.98848	8.7065	9.25106	9.07053	8.52177	9.21299	9.77209	10.2089	9.92359	9.8811	1.04327	0.985976
mz_1434.1806	6.26305	6.34958	5.18456	5.78531	2.93748	7.68802	7.3054	5.88443	7.06731	5.45613	5.72279	-1.5767	0.985976
mz_1685.1661	12.5044	11.5382	12.0318	12.0653	12.0286	12.4424	10.7239	13.3346	13.0496	14.0049	13.7014	1.27194	0.985976
mz_1252.9384	11.9401	12.0516	11.0869	11.5569	11.9647	13.5376	12.2465	12.1877	11.6357	11.176	11.2303	-1.01463	0.985976
mz_1008.8366	6.5764	7.46387	7.55977	6.037	7.08125	7.51373	7.67311	4.46285	5.74499	6.59013	6.01174	-1.29222	0.985976
mz_1397.9406	8.95001	7.85725	10.685	9.68732	10.6369	9.29368	8.08481	9.87733	8.56397	8.95027	9.90973	1.24566	0.985976
mz_0951.6154	13.8609	12.8875	13.7414	12.704	12.2293	13.253	10.7785	14.1046	15.4522	14.8986	14.2708	1.60136	0.985976
mz_1737.2181	7.76701	8.59871	6.93227	7.83788	7.22034	8.37384	8.59891	7.00253	7.25156	8.50737	7.8538	-0.977226	0.985976
mz_2137.4208	10.5627	10.1037	10.0852	10.5644	9.4864	5.55583	8.73725	9.49055	10.4351	8.4307	10.1358	1.76658	0.985976
mz_0945.7630	9.42038	8.62723	9.63456	10.511	10.6938	7.62253	9.70573	9.73693	8.93097	10.2669	9.51587	1.18698	0.985976
mz_2125.5663	10.038	9.42979	10.0349	9.1128	9.98527	8.18072	9.16952	9.99922	9.72197	9.75985	10.5744	0.976624	0.985976
mz_1131.8210	8.10339	10.4184	8.50151	9.3166	9.27268	9.64075	8.92857	8.76304	8.12267	8.20813	8.72718	-1.03566	0.985976
mz_3026.9933	7.46287	8.3442	7.73488	7.28115	8.28144	8.00176	8.63427	6.52445	7.4019	6.79226	7.18774	-0.99341	0.985976
mz_2139.7792	7.28039	6.9575	7.09947	7.33835	6.33813	6.04688	5.51937	6.77477	7.49047	7.85179	7.37163	1.01854	0.985976
mz_0761.5439	11.3822	12.2657	11.8216	12.2652	12.0358	12.1822	13.0137	10.8407	11.1977	11.4052	10.2801	-1.08364	0.985976
mz_1333.8719	7.26911	8.91773	8.15	7.04936	7.27464	8.51243	11.0101	8.31458	9.6378	8.83484	7.42824	-1.48527	0.985976
mz_2175.8648	13.291	12.4162	13.6277	14.0203	12.9974	11.557	12.4079	13.2205	13.8372	11.5988	14.0065	1.19793	0.985976
mz_0584.3558	9.28151	8.46816	9.09883	9.40919	9.03338	8.3135	6.8638	9.07275	8.72466	9.7246	7.75533	1.13071	0.985976
mz_1374.8621	7.94571	9.60744	8.31924	7.47351	9.90761	9.4269	10.2312	8.94764	7.01531	8.60355	9.26536	-1.32043	0.985976
mz_2857.8105	10.7067	10.0673	10.7601	11.2007	10.6163	9.05119	10.6415	10.856	11.4413	10.5402	10.9606	0.965225	0.985976
mz_1046.6986	9.16434	10.8601	10.3481	10.1686	8.63463	12.2404	10.0325	9.65455	10.0528	8.97849	10.8685	-1.31058	0.985976
mz_1568.5237	8.12063	6.59496	8.23067	8.79644	6.927	6.52115	7.20346	8.02192	8.40889	8.73864	6.55005	1.20109	0.985976
mz_0615.1813	7.73991	6.56679	7.41907	9.21059	8.88614	8.17752	5.82241	7.39208	8.22075	8.28889	7.85164	1.27056	0.985976
mz_0499.3194	7.55344	8.82679	10.3013	9.89163	9.32049	8.32475	7.62791	10.4312	9.28088	9.64176	10.2788	1.32763	0.985976
mz_1453.1297	7.54777	8.43566	8.33774	8.15552	7.78935	8.32035	9.73457	7.32052	7.79236	8.05526	7.90093	-0.967762	0.985976
mz_1184.8475	10.1964	12.2098	11.3597	10.5298	11.2111	12.6704	11.1588	11.8977	11.0804	10.7037	10.4293	-1.08698	0.985976
mz_1356.8601	7.84993	7.77847	6.4161	6.99008	6.72012	7.61576	10.3443	5.61072	5.15222	8.585	7.55432	-1.7197	0.985976
mz_2544.1802	7.31268	6.0578	7.81778	7.61748	7.78872	6.78424	7.04521	7.24631	7.52516	7.49558	7.179	0.868755	0.985976
mz_1993.7733	10.0386	6.18489	10.5894	11.21	7.34209	5.53376	10.9528	10.7161	9.84352	8.92382	10.366	2.32154	0.985976
mz_1456.0558	7.11041	7.45321	7.03352	8.23106	9.11721	6.8002	6.87337	8.98223	8.80042	8.1112	8.38813	1.17952	0.985976
mz_2019.9503	11.2953	11.0608	11.6235	11.6769	12.1964	9.99746	10.5568	11.7184	10.6994	11.3567	11.3882	0.956003	0.985976
mz_1424.9939	11.9736	10.7593	10.8452	11.4258	11.6993	8.2558	10.5875	11.6193	10.6302	11.3557	10.0182	1.32843	0.985976
mz_2249.5272	7.00769	6.69523	5.20338	6.19615	5.61043	7.78385	8.40282	6.5576	7.65457	6.25056	6.57328	-1.24559	0.985976
mz_0473.3262	10.157	8.46666	10.1128	8.95908	9.67711	9.55901	8.90831	10.3731	10.3155	9.95916	10.0495	0.972423	0.985976
mz_1249.2635	7.1867	4.19262	6.83088	5.61502	8.27655	5.08895	8.07624	8.49878	7.83726	8.21252	7.93925	1.76368	0.985976
mz_0679.5789	12.9426	12.1367	12.3768	13.052	12.4083	10.9779	12.3453	13.1697	12.7654	13.5859	12.328	1.00859	0.985976
mz_0828.6089	9.8886	8.5335	9.69063	8.26369	8.7384	11.4813	12.3154	6.35813	7.73946	10.1256	9.55262	-1.98209	0.985976
mz_1720.1485	10.5374	9.89853	10.0938	11.0514	10.8884	9.28668	9.67552	10.3426	10.3062	10.2588	10.4344	0.868879	0.985976
mz_0803.3822	7.63541	8.60213	7.0896	5.77563	8.99076	11.4448	8.08774	8.06627	8.61703	6.88754	8.12695	-1.72958	0.985976
mz_1189.7414	6.79817	7.6609	6.31166	7.69144	7.44923	8.29854	10.089	6.95004	7.62815	6.39605	8.92553	-1.41401	0.985976
mz_0803.6171	9.20763	10.5184	9.28139	8.71401	9.72705	10.8978	11.6715	9.35993	10.4877	11.3363	10.1464	-1.24666	0.985976
mz_1183.8006	13.5143	13.5742	16.2037	13.3102	12.6892	15.7114	15.9107	12.8698	13.3464	12.5235	12.0004	-1.75827	0.985976
mz_1202.0342	7.35488	8.73498	7.98772	7.18405	6.93975	7.96641	8.33665	6.22151	5.31368	6.0574	8.5096	-1.39994	0.985976
mz_1348.7154	9.52046	10.0232	11.7702	8.38874	9.84674	11.4611	12.0585	10.2775	9.81164	8.14838	8.90023	-1.59795	0.985976
mz_0675.3538	7.66263	9.64697	8.96374	9.12074	9.50376	9.91291	9.92558	9.28944	9.2075	8.32766	8.05276	-1.06246	0.985976
mz_1882.3104	7.39623	10.344	9.51247	11.0475	7.21785	10.2925	10.8539	9.3115	9.60815	9.03843	7.48973	-1.66909	0.985976
mz_1748.4662	11.7124	11.6941	12.1184	12.5548	11.8487	10.8139	10.3078	12.7632	12.0878	10.9687	11.9064	1.05647	0.985976
mz_0813.5521	8.63894	8.73588	8.48593	8.69117	8.32088	5.59923	8.33485	8.9859	9.51532	9.35256	9.21181	1.34366	0.985976
mz_1601.8306	10.2136	8.99517	10.5118	10.0866	9.87655	6.97046	10.028	9.42042	10.3062	8.99622	10.5125	1.32594	0.985976
mz_1552.3351	9.48384	8.64663	9.00482	9.94478	9.7411	8.07697	8.52799	8.76962	10.0544	8.51631	10.2464	1.05296	0.985976
mz_0984.6139	17.4782	16.2711	15.3614	16.1891	15.0227	14.7776	13.4665	16.0834	16.8242	17.0223	16.2224	1.43701	0.985976
mz_0520.2681	13.3945	13.5552	17.1555	12.9917	12.5573	16.8589	17.0433	13.2756	13.6067	13.8682	13.0092	-2.08683	0.985976
mz_1310.7592	12.8114	11.5332	12.5147	12.0805	11.9661	11.2707	11.4874	12.419	12.6023	11.9861	11.9259	0.857828	0.985976
mz_2410.2175	9.08854	8.75352	9.46762	9.66958	9.32194	6.48261	8.45404	8.76235	8.91885	8.69767	8.42792	1.14759	0.985976
mz_1393.9180	6.74382	8.53594	8.64367	6.90156	6.25839	8.41429	8.23339	7.83652	7.57621	5.8065	7.36176	-1.25349	0.985976
mz_1406.1493	5.52533	8.57997	5.65309	5.71405	8.71092	8.15829	7.84733	6.3071	7.88916	6.21168	7.42758	-1.51533	0.985976
mz_1963.4196	6.23696	5.09428	8.56796	6.89271	7.65896	6.56395	7.32692	7.94231	8.55296	8.61255	7.27277	1.38876	0.985976
mz_2577.8074	11.0813	8.32551	11.1868	11.1269	11.2779	11.0094	10.3573	10.8877	10.6523	10.947	11.1405	1.14014	0.985976
mz_1858.1884	11.8117	10.5696	11.2223	9.69631	12.5668	9.17238	10.21	11.7109	10.5294	10.9018	12.1697	1.34215	0.985976
mz_1974.4920	6.90169	6.10348	6.21335	7.46092	7.70695	5.9385	6.08179	6.5035	7.19171	6.77473	7.06579	0.936074	0.985976
mz_2282.5648	9.29314	8.36881	8.02064	8.69623	9.98062	7.30265	7.17633	8.61223	8.67246	8.67815	7.92278	1.1186	0.985976
mz_0960.5865	11.2426	11.7087	11.2339	10.9253	11.117	13.7743	11.355	10.0293	10.8082	10.3102	12.2043	-1.29547	0.985976
mz_1574.3042	10.6446	9.91651	10.2658	10.5323	10.6417	9.28342	9.63648	10.3451	10.5093	9.94992	10.686	0.834702	0.985976
mz_0818.5341	7.42674	9.07495	8.75617	7.58967	8.42628	8.95883	8.6796	6.77582	7.98412	8.18583	5.93072	-1.27004	0.985976
mz_0929.5761	9.58438	9.52319	9.15727	9.40799	9.0975	8.4209	7.15449	10.0355	9.1478	9.66072	9.53601	1.0872	0.985976
mz_1886.0073	8.99374	8.0238	8.46958	8.72724	9.07536	8.16081	7.29908	9.04583	8.52344	8.47769	8.31056	0.875031	0.985976
mz_1954.4760	9.67558	11.2972	6.86545	6.90962	10.4612	10.8672	7.37227	5.93853	6.02365	7.43788	6.93972	-2.31412	0.985976
mz_1688.4451	10.3825	8.41875	8.99285	9.78253	8.36518	7.18116	8.107	9.30414	7.78664	8.89363	9.51424	1.22542	0.985976
mz_2034.9142	7.45698	5.94685	7.76422	7.86897	7.96703	5.91559	7.62869	7.67737	8.16438	6.23263	8.24455	1.17497	0.985976
mz_1327.3543_1	9.59229	9.71681	11.3664	10.4927	9.75878	10.0538	7.57758	10.2533	10.4884	10.6268	10.2753	1.24071	0.985976
mz_0868.8090	8.33541	9.65097	8.94046	8.1313	5.9059	9.87081	9.28196	9.15315	8.55987	6.9737	9.09178	-1.4648	0.985976
mz_0643.5425	12.1014	13.7737	12.8065	13.3246	13.0017	13.4766	13.4019	12.5402	9.92624	10.7351	12.0957	-1.48431	0.985976
mz_1226.8319	6.94987	10.0737	6.6693	6.58167	9.08846	9.27871	9.41361	10.0143	8.1001	9.03188	7.43989	-1.60422	0.985976
mz_2053.3344	5.97939	7.28339	5.59237	7.32386	7.16553	7.57294	6.97403	5.59545	4.7032	4.44187	6.40551	-1.37589	0.985976
mz_1489.0925	10.7118	10.973	9.96439	9.34289	10.4995	11.6453	10.4726	8.09113	8.26224	10.3345	10.0702	-1.37071	0.985976
mz_3003.5132	10.3782	10.3396	10.5087	10.6829	10.0611	8.9144	8.85288	10.1015	9.872	10.4436	10.555	0.956418	0.985976
mz_1036.7306	8.61897	7.1247	9.99343	9.0188	9.31837	8.22038	8.17706	8.60766	9.10907	9.58914	7.64139	1.14639	0.985976
mz_0957.7964	10.2449	9.34338	8.65421	11.4847	10.3217	9.07416	9.01038	10.9677	11.2196	9.90911	10.1963	1.23212	0.985976
mz_1007.6992	12.4108	11.5146	12.3624	11.9775	13.342	11.3337	11.4114	12.444	11.7195	13.7396	11.9786	1.07691	0.985976
mz_1189.5905	9.95088	8.13781	10.4644	7.44712	9.83746	7.92778	5.63427	8.66357	8.19853	7.31535	9.68812	1.71239	0.985976
mz_2845.0550	8.41588	7.47883	8.80894	7.35056	8.33186	6.90531	7.2139	8.52489	7.75446	7.55528	8.7519	0.987372	0.985976
mz_0885.6328	7.3607	5.39611	8.07709	8.02999	6.37311	8.07268	5.59728	8.05592	8.19586	7.67644	7.63036	1.31958	0.985976
mz_1196.8279	9.51095	9.30281	9.9136	8.04901	7.97054	10.8309	10.4723	9.63333	8.32221	9.76181	7.60505	-1.35621	0.985976
mz_2911.8939	7.96364	7.35405	8.28402	8.67179	8.24246	6.12581	6.93247	7.6452	7.03137	7.40906	7.4375	1.03152	0.985976
mz_0857.3140	13.3426	14.4713	9.34845	8.04125	13.8793	13.9474	11.5005	12.7494	8.62469	7.66368	7.47755	-3.16555	0.985976
mz_0877.6328	8.09993	8.26258	8.46798	6.94685	6.74274	8.61444	9.36294	7.99247	8.54067	6.35496	6.79731	-1.25379	0.985976
mz_1354.7490	9.87866	9.57341	10.2505	9.25616	9.67481	10.6004	11.1059	8.9634	9.18719	9.00401	8.97781	-1.02749	0.985976
mz_1726.1790	8.29121	7.97477	7.55692	6.58558	7.50904	6.23966	3.94632	7.76092	8.16951	7.29023	7.34182	1.50957	0.985976
mz_1788.0643	11.3702	10.8128	11.2811	10.5099	11.7598	9.65716	10.3261	10.868	11.1222	11.8767	11.046	0.963889	0.985976
mz_1268.9251	10.189	6.89683	10.9684	6.69312	11.7604	10.9743	7.4405	12.9558	11.6439	14.7087	11.824	2.90571	0.985976
mz_1025.6511	6.12627	9.46704	7.0487	7.78338	6.3941	10.1802	7.40406	9.00759	8.99308	6.16802	7.06937	-1.69327	0.985976
mz_0580.3820	10.0987	8.84676	7.47024	7.88553	9.10669	7.47805	6.53942	9.37299	9.11057	10.2218	9.31976	1.45188	0.985976
mz_0862.6379	6.92265	8.77671	7.4174	7.43929	7.4798	8.01875	8.37038	6.99903	6.5303	8.20427	8.09061	-1.00319	0.985976
mz_0703.1621	8.4766	10.3488	10.2577	9.62783	8.43653	10.5455	11.1033	10.15	9.54475	9.66181	10.2257	-1.11825	0.985976
mz_1211.9282	5.11487	8.14766	7.17573	8.29372	6.74039	8.50295	7.79973	6.84412	5.16998	5.7206	7.97507	-1.52081	0.985976
mz_2805.7792	4.83497	6.84561	7.11674	6.68295	6.58006	8.50023	7.37298	6.77582	4.21993	6.60144	6.29759	-1.43425	0.985976
mz_1847.0661	9.93943	8.74811	10.0195	9.97821	10.1867	7.29432	9.62204	8.41017	9.84609	9.79942	9.71226	1.18166	0.985976
mz_1050.0209	9.44182	8.71643	7.92473	9.66693	9.76542	7.26675	9.20859	10.1135	10.4473	11.2872	9.78022	1.40613	0.985976
mz_0932.8641	7.85767	12.5149	9.17971	11.2343	9.69311	9.45083	10.7667	10.2557	8.19231	9.05994	8.01349	-1.72506	0.985976
mz_0951.9103	10.8862	12.6239	11.7017	12.6082	13.1907	12.8384	13.8052	11.1037	12.0517	12.3026	11.1683	-1.21253	0.985976
mz_1748.1845	10.41	9.13147	9.93552	8.86591	9.63564	8.19475	8.75216	9.17572	9.88612	10.0155	9.38859	0.971334	0.985976
mz_0978.6887	10.9909	12.1579	10.1761	11.3109	11.2628	8.70231	8.48442	12.189	12.0813	11.43	11.3135	1.56278	0.985976
mz_1108.6027	6.186	5.81935	7.65218	7.87209	7.27231	7.31692	5.17338	7.41911	6.66701	8.53934	7.26153	1.25548	0.985976
mz_0337.2020	8.01353	7.43132	7.79086	6.93477	7.43677	5.2196	7.14676	8.30321	7.62585	8.03549	7.64201	1.12358	0.985976
mz_1086.6935	10.0646	10.4908	11.4216	10.1699	9.71065	11.2749	12.9399	10.5176	10.7314	10.2992	10.148	-1.18567	0.985976
mz_1384.8185	6.1335	7.67598	6.73126	7.22425	4.14088	7.57977	6.8095	6.13059	6.48903	6.17837	4.34338	-1.43368	0.985976
mz_0535.3276	9.67469	9.33725	10.2045	9.28969	11.5479	8.02874	8.41224	10.2589	8.50146	10.1531	9.40638	1.28684	0.985976
mz_0894.6066	6.13212	6.1427	7.98526	8.08629	8.56438	7.84737	5.51045	8.19175	8.38526	7.16408	8.28647	1.34928	0.985976
mz_1803.0651	10.224	11.5927	10.6599	10.68	11.2026	11.6139	11.9715	10.7862	11.4758	11.0913	10.6774	-0.876406	0.985976
mz_1405.1313	10.2457	11.1957	10.3206	11.3661	10.8056	12.4242	11.9591	10.3137	9.54523	6.53668	11.0722	-1.83394	0.985976
mz_0944.7913	9.18731	7.62669	7.13012	9.98583	9.02756	7.85173	7.19473	9.20618	8.42803	8.38773	8.63479	1.19072	0.985976
mz_0480.3096	14.1467	14.8819	18.1934	14.5965	13.8922	17.287	17.6553	14.2206	14.7585	13.5681	13.6555	-1.97912	0.985976
mz_1298.9598	11.7607	13.0916	12.7678	12.6427	12.018	12.7885	12.6782	11.131	11.8263	11.1322	11.3557	-1.02345	0.985976
mz_1137.8573	12.3367	12.6182	11.4328	12.409	11.927	13.8154	12.8013	12.1623	11.9727	12.9327	11.1075	-1.04325	0.985976
mz_3001.5703	11.5502	10.401	11.651	11.6907	11.5262	9.901	11.6599	11.8819	11.2357	11.5802	11.6322	0.939549	0.985976
mz_2998.0034	10.0577	10.8796	10.5842	11.0987	10.7659	8.81481	9.30608	11.2338	10.5815	10.4875	11.0092	1.06047	0.985976
mz_1843.2369	8.33967	8.25125	7.35723	7.2675	8.17574	9.16521	9.68463	6.94141	6.09178	9.25331	8.01288	-1.35376	0.985976
mz_3026.5818	9.33707	8.24262	8.64554	8.46076	9.52138	7.70058	8.44361	9.36749	9.02784	8.82603	8.92287	0.884685	0.985976
mz_2401.2133	9.88287	8.85799	9.95156	10.8014	10.3692	6.82882	9.59694	9.30685	10.456	9.27697	8.46371	1.38564	0.985976
mz_1102.6050	7.83713	7.41296	7.59737	7.75589	7.30148	6.66444	5.9167	9.13865	9.21978	12.4081	7.98009	1.9901	0.985976
mz_0787.2722	8.68826	8.32668	7.26306	7.94644	8.19468	11.8606	8.30108	8.69243	8.24918	6.64522	7.55629	-1.59169	0.985976
mz_0702.5151	15.774	16.16	15.7023	15.5383	15.5543	16.5446	16.8812	15.163	16.3947	15.405	15.707	-0.873768	0.985976
mz_2716.6344	11.1953	11.1571	11.116	11.2697	11.0575	9.77415	10.2855	11.7385	11.4906	10.9703	11.7131	0.913292	0.985976
mz_1765.4325	6.53478	9.89104	9.1022	8.25346	7.20424	8.96403	9.72623	9.55295	6.07061	8.76108	8.26794	-1.55869	0.985976
mz_0814.5932	7.93003	9.98699	9.27936	10.2004	7.50134	10.3032	11.4909	7.83594	9.86849	10.3679	9.64419	-1.51524	0.985976
mz_0922.8797	10.6544	12.3336	9.78344	10.8707	11.0369	12.334	10.1153	10.3782	10.6024	10.2875	9.90216	-1.15486	0.985976
mz_0796.3280	8.58726	8.07748	8.36979	7.04157	6.37987	5.72814	5.68772	9.2821	9.44108	7.89678	7.57897	1.5744	0.985976
mz_1400.0001	6.06046	8.32008	8.13035	6.7391	7.37226	8.02695	7.20477	6.05612	6.57904	5.39214	6.67362	-1.22522	0.985976
mz_1117.6613	8.91874	8.14163	9.81937	8.04148	7.56385	7.34692	7.07136	8.49773	8.68564	8.6756	8.58899	1.07896	0.985976
mz_0801.2514	10.2372	12.8392	10.5367	10.7912	11.3944	12.1863	11.4251	9.96766	12.371	7.97222	11.0289	-1.61276	0.985976
mz_0636.4599	8.60542	7.52202	7.9908	7.72688	8.74656	7.01897	7.39058	8.57618	7.81429	7.69208	8.63851	0.913316	0.985976
mz_1161.1094	6.5096	8.5331	6.82913	4.83059	8.21406	8.1628	9.37949	6.42497	8.69895	8.48151	6.43613	-1.63868	0.985976
mz_1442.9445	7.52433	8.92011	5.79254	8.81599	5.15725	8.24238	9.30467	6.60224	7.59783	7.67943	8.60921	-1.60004	0.985976
mz_2183.4474	6.30356	7.6942	6.94424	5.89877	4.06554	7.64585	7.57004	5.54669	6.12336	7.3398	7.54879	-1.41535	0.985976
mz_2862.9072	7.77853	7.55115	8.08708	7.93624	8.06196	7.24971	5.92274	7.82901	7.37498	7.786	7.87966	0.933815	0.985976
mz_0668.3053	10.4043	9.36955	9.19363	8.6304	9.11538	7.95056	7.57617	9.30127	9.99263	9.35559	9.19673	1.09999	0.985976
mz_2848.8586	11.0023	9.98135	9.40674	10.6837	10.8712	8.1487	10.0568	11.0515	9.95521	10.7485	10.6533	1.15091	0.985976
mz_1159.6316	13.243	16.0918	13.6844	13.7611	14.6419	15.8203	14.3278	14.7353	14.7291	14.7654	14.6552	-1.13636	0.985976
mz_2199.8723	6.59194	7.26741	5.99785	6.78039	6.49524	9.22906	6.81427	7.74782	5.98111	5.46631	6.82098	-1.28504	0.985976
mz_1327.2952	6.95896	8.06976	6.1332	7.12331	5.68189	7.24457	7.94528	5.39069	5.84922	6.73397	8.12448	-1.25374	0.985976
mz_1620.0346	8.10491	6.73021	7.77322	8.90154	8.31023	6.77582	5.085	5.57357	7.42519	7.54054	7.19777	1.40636	0.985976
mz_1266.9986	10.2088	10.0273	9.6024	10.6626	10.1274	9.57336	7.09191	10.2558	9.49276	10.579	10.3127	1.25767	0.985976
mz_0892.5334	15.3819	14.7534	15.5689	15.4442	15.0089	13.9784	14.0791	14.7054	14.8382	15.6434	14.7224	0.893878	0.985976
mz_2972.5097	9.0614	7.93433	8.81105	8.39887	9.01355	7.77758	7.62987	8.14384	7.96065	8.94402	9.07798	0.895829	0.985976
mz_1440.2733	10.0084	8.59429	7.5173	11.0531	10.8206	6.00085	10.0649	10.6747	10.8726	9.86174	9.79039	1.85485	0.985976
mz_0814.5381	11.2868	11.7351	10.5161	10.6	9.71939	11.4368	11.7299	10.8673	10.5362	10.5303	11.4316	-0.948007	0.985976
mz_1337.0898	7.24192	6.79019	6.42388	7.25205	7.41026	5.51401	6.22287	8.20499	7.31925	6.6426	7.02914	1.01482	0.985976
mz_1743.2334	11.2097	10.6256	10.6171	10.8072	10.9676	8.66647	10.7515	11.3159	11.8231	10.7151	11.4462	1.09824	0.985976
mz_1165.7615	8.50879	9.30423	8.83657	9.30399	8.87925	8.83225	10.9073	7.50943	6.3941	5.98354	8.80437	-1.65376	0.985976
mz_2279.7901	10.8139	9.90335	10.8153	10.2972	10.4839	9.59521	9.57919	10.2468	10.3221	10.5672	10.3795	0.798164	0.985976
mz_1246.9172	8.89071	6.98323	7.33114	7.50298	7.32465	7.16926	6.44538	8.36117	7.71378	9.25964	7.52266	1.12238	0.985976
mz_1782.5140	9.5753	7.71922	12.2874	11.6427	8.30628	8.52147	10.4612	11.1146	12.4518	11.6885	9.63168	1.93664	0.985976
mz_0847.6535	12.5253	13.2916	11.8656	12.7442	13.0348	13.8477	12.9504	12.6509	11.661	12.7964	11.89	-0.967214	0.985976
mz_0822.5866	12.9495	13.4704	14.3633	13.1063	11.5407	15.0466	14.2915	13.7228	12.9498	12.5531	13.0564	-1.23928	0.985976
mz_0597.2436	9.64302	10.4931	10.3904	9.40849	10.9597	11.1977	11.0614	9.43187	7.59261	10.0656	9.33907	-1.31354	0.985976
mz_1512.0620	9.98808	12.6811	13.3042	12.7683	12.3226	13.4837	13.5219	11.3197	11.5642	12.4081	11.0259	-1.39126	0.985976
mz_0930.6195	9.59031	9.79522	9.00315	8.2806	8.1017	9.12492	9.54172	8.00851	8.4545	8.49759	8.30955	-0.956547	0.985976
mz_2148.4857	8.5487	9.19993	7.32338	7.40125	8.9038	9.9712	9.57469	8.92843	8.94942	8.11295	9.42519	-1.1328	0.985976
mz_1051.8123	7.30645	6.00094	7.22549	7.49301	5.07459	5.91087	5.9308	7.16173	7.46735	7.98884	7.43694	1.19677	0.985976
mz_0572.2994	10.7985	10.4917	15.7528	10.2038	10.5282	15.453	15.5975	11.1664	10.3501	10.3568	9.74233	-2.73503	0.985976
mz_1353.9700	6.01818	7.21902	6.96938	6.25175	7.33492	7.36968	7.9483	6.71738	5.87958	6.46986	6.87808	-0.947444	0.985976
mz_0855.3348	12.7159	15.3962	11.0509	12.2803	13.9273	17.3884	12.2818	14.0959	14.5248	7.71024	9.98504	-2.98584	0.985976
mz_1565.0818	6.18889	8.83345	8.12234	5.10745	7.96815	8.34851	8.34717	7.23222	4.38568	8.24939	7.10231	-1.71516	0.985976
mz_0513.2572	8.67974	10.1358	9.0638	9.63091	8.23457	10.4935	9.00465	8.27121	9.00672	9.28242	8.77304	-1.01016	0.985976
mz_0495.3327	11.0895	11.0849	14.9558	11.0264	10.8712	15.2834	14.8817	10.7274	11.7587	11.9207	10.2264	-2.17794	0.985976
mz_0454.2928	17.5705	17.3567	20.4936	17.4837	17.0341	20.7232	20.4654	17.3563	17.3949	17.557	17.0463	-1.77306	0.985976
mz_2872.8586	9.56142	9.20755	8.99536	9.54085	9.42013	7.75833	7.76808	9.97766	9.89876	8.18264	9.03643	1.082	0.985976
mz_1210.0429	7.14997	6.15035	6.20562	6.13791	7.0898	8.47839	7.98396	6.5828	5.98379	6.17267	5.46691	-1.18888	0.985976
mz_2782.9502	10.9393	11.1574	10.6339	11.9863	11.6425	10.0485	10.0747	11.6137	11.5861	11.1417	11.5144	0.955363	0.985976
mz_2155.5844	7.9082	7.77513	7.97399	8.65999	8.19213	8.00423	4.94147	8.42576	8.72083	7.80347	7.86102	1.28623	0.985976
mz_1230.9062	6.47295	5.31842	8.33739	7.62158	7.23565	6.15954	7.2981	6.75689	7.21669	7.74252	7.76064	1.13435	0.985976
mz_1049.8144	10.2526	11.8279	10.9689	10.3994	11.1629	12.1987	11.9126	12.0377	10.5409	11.6588	10.7631	-1.0067	0.985976
mz_1211.7385	10.5246	11.7296	12.3934	9.8149	12.5402	12.7355	13.5255	11.4497	10.4523	11.5328	11.671	-1.36616	0.985976
mz_2596.2334	11.8937	11.0008	11.8809	12.2385	11.9781	11.7318	9.7551	11.7962	10.9821	12.1656	11.8931	1.02427	0.985976
mz_0665.4093	9.23491	8.15219	9.55841	10.0837	9.6764	7.1504	9.57295	9.86046	9.20719	9.58097	8.39283	1.15751	0.985976
mz_1043.6641	7.7736	9.1867	8.69971	8.32088	7.79138	8.74175	9.6345	8.04368	8.64944	8.73833	8.33141	-0.894099	0.985976
mz_0353.3414	8.2256	7.31759	7.79158	8.42301	8.94395	5.3709	8.24101	8.1348	8.49221	7.86594	7.61269	1.20972	0.985976
mz_1997.7244	11.4691	7.70754	11.8556	10.4784	10.5272	9.53304	8.79244	10.8564	10.1747	7.63428	9.61907	1.64917	0.985976
mz_1700.2760	11.0461	9.12071	9.5635	10.661	11.3674	9.34523	10.9757	10.9648	12.3462	12.8778	11.1236	1.42992	0.985976
mz_1510.3363	9.35452	8.28243	9.63185	11.1137	11.0997	10.0153	9.59819	10.8776	11.0742	10.2035	10.3771	1.16788	0.985976
mz_2854.7980	9.34865	7.87209	9.11174	10.3008	9.32693	7.75942	10.2194	10.8721	10.5576	9.40095	10.5509	1.31672	0.985976
mz_0882.4376	15.6176	15.9811	14.7828	15.5745	15.5341	15.7873	16.4515	14.4074	15.5473	15.0572	14.5956	-0.933741	0.985976
mz_2534.7737	14.8607	14.0007	14.1818	14.9813	14.4596	13.7467	14.3186	15.0022	15.2861	15.0022	15.5032	0.887641	0.985976
mz_1525.9628	6.53548	4.14047	6.91988	6.14488	7.50587	4.8644	7.33692	5.88859	7.47146	6.96588	6.99498	1.35612	0.985976
mz_1127.7744	9.59178	7.53409	9.3836	7.97304	9.57491	9.33163	6.70887	8.62463	9.67849	9.05025	8.86858	1.23496	0.985976
mz_1175.7310	12.1527	13.0895	12.2461	12.4076	12.4802	12.5251	13.5755	11.2992	12.2066	12.2734	12.2924	-0.893604	0.985976
mz_1475.3113	7.27252	9.15579	7.06234	8.38224	7.43518	10.7611	6.94964	8.21835	5.97625	7.28557	7.73605	-1.53446	0.985976
mz_1407.1503	7.04976	7.7867	4.84438	6.76293	5.05839	7.97739	7.81205	7.3121	8.01082	5.85858	6.82452	-1.39353	0.985976
mz_1694.1774	15.0903	14.9447	14.7332	13.8572	14.7735	13.5287	13.3924	16.0188	15.3318	15.6814	15.2021	1.13078	0.985976
mz_1196.8159	10.1052	10.0265	10.1241	9.92352	9.90333	12.0305	10.4189	8.75028	8.42501	8.24051	10.4779	-1.33157	0.985976
mz_0941.6382	6.59103	5.82348	8.77427	7.11676	8.3059	7.52359	6.70208	8.01406	7.90919	8.06162	7.84156	1.14375	0.985976
mz_0629.4752	9.03079	6.33096	8.72942	9.9318	8.18284	9.19352	7.72973	8.09985	10.1356	9.13257	9.68969	1.36517	0.985976
mz_1135.6316	11.2296	12.2785	13.974	11.3775	11.1272	13.6916	14.2873	11.9882	12.2968	11.2029	7.868	-2.03612	0.985976
mz_1025.5057	8.73007	8.2135	7.95332	6.83435	7.86988	9.53037	9.30714	7.50446	8.3338	8.65153	7.64043	-1.07727	0.985976
mz_1942.6604	11.182	9.42887	11.0248	10.3775	7.52577	6.91391	7.52584	8.67906	9.76743	8.9955	9.49057	1.67412	0.985976
mz_0786.5737	12.0481	12.5685	12.8501	10.5914	11.5305	12.0207	13.8705	11.9237	10.1439	8.59243	11.46	-1.67736	0.985976
mz_0973.6198	7.42977	8.09226	7.72319	8.06402	6.89213	8.22019	8.27594	6.69248	5.98975	7.6251	5.45901	-1.2117	0.985976
mz_0975.7623	7.51392	8.45876	8.66668	8.90223	6.57877	10.1795	9.72675	8.38264	7.96837	8.1072	9.31819	-1.27525	0.985976
mz_1041.5557	8.17589	9.41039	6.51231	8.44349	8.47353	8.75308	8.99256	8.51961	8.05269	7.60132	8.27199	-1.04566	0.985976
mz_2616.7139	8.88757	7.88522	8.73782	9.32287	9.00407	7.47759	8.15712	8.89622	7.97453	8.43132	8.52845	0.882878	0.985976
mz_0828.7287	13.7789	14.6374	13.8341	13.3713	12.2472	14.6543	13.1998	12.6005	11.7399	10.4797	13.2649	-1.49923	0.985976
mz_3118.0609	5.79193	5.59562	6.95744	7.27676	6.61736	6.37631	5.21237	6.74425	6.88189	7.9382	6.16945	1.06906	0.985976
mz_1764.1583	6.36418	8.39428	7.3465	7.11303	7.39448	7.23524	8.33641	5.49535	7.20604	7.62864	6.32884	-1.12901	0.985976
mz_1646.1892	12.6727	12.4596	12.7671	12.8626	13.0451	12.5212	10.8101	13.3523	12.4253	13.0405	13.0444	0.970928	0.985976
mz_1338.9030	9.24042	6.99835	8.60983	8.48003	9.14575	8.64482	6.52861	8.75263	8.96265	7.85238	7.46488	1.17298	0.985976
mz_0972.6699	12.1715	11.284	11.5334	11.951	10.4587	8.94198	10.5306	11.5327	10.7114	11.5342	11.5032	1.17231	0.985976
mz_2156.8771	9.73398	8.39317	9.19702	10.1865	10.0879	8.95058	8.52272	8.89989	9.22256	9.06966	10.1138	0.941771	0.985976
mz_1327.7185	8.42074	8.47688	8.89114	8.20287	7.21649	4.87474	6.91981	7.92291	8.0638	7.92106	8.27826	1.35752	0.985976
mz_1184.8030	8.50559	8.79978	9.17504	10.058	9.06501	10.5544	11.5427	9.13541	9.74586	7.64777	7.88546	-1.39669	0.985976
mz_1181.7932	12.864	12.9915	12.4336	12.5296	13.0106	15.0376	13.9443	13.5017	13.1367	13.567	11.5451	-1.16759	0.985976
mz_1468.0840	12.6528	14.6543	13.3924	13.5438	13.7891	15.23	13.383	12.9731	13.8625	13.6984	13.3538	-1.0142	0.985976
mz_0709.5378	7.83675	14.1862	7.75725	12.7425	13.7528	12.9275	13.3441	9.84863	9.4244	13.6221	11.3577	-2.69319	0.985976
mz_1264.8703	11.7792	12.6099	11.2067	11.3267	12.4109	11.9875	15.3487	12.3132	12.0177	12.1382	12.5184	-1.35148	0.985976
mz_1481.0201	8.2027	11.3986	9.50319	10.5524	9.90569	10.3596	10.2461	9.85994	9.60334	9.05362	9.8511	-1.10159	0.985976
mz_0586.3433	10.394	11.3395	8.12889	10.1814	11.1531	10.9187	11.5222	9.32964	10.8618	10.1123	9.90972	-1.25127	0.985976
mz_0874.7106	8.90888	7.79908	8.68567	7.74824	8.42335	8.08066	7.73994	9.63159	8.91495	8.97062	9.63292	0.991304	0.985976
mz_0827.6171	7.02994	7.7318	7.59257	8.66504	7.85047	4.26088	6.94581	7.34788	7.19298	8.49187	7.58303	1.40639	0.985976
mz_1147.9451	8.21567	9.82078	8.97164	8.97964	9.05735	9.42819	9.66496	8.67358	9.20645	8.27391	8.96729	-0.844787	0.985976
mz_0817.7882	6.51603	10.025	9.69966	5.58842	9.05105	9.79388	9.11227	4.92038	5.74288	9.19742	8.92048	-2.18918	0.985976
mz_0547.4850	14.4479	18.1619	14.0126	14.1113	17.4672	17.3827	13.864	13.6763	13.6522	14.4404	14.1863	-1.97026	0.985976
mz_1300.9677	5.03641	7.5468	7.14011	5.39206	7.22627	7.58546	7.9452	7.20701	7.3222	6.45852	4.59375	-1.39544	0.985976
mz_1522.0592	8.78393	7.51588	6.83472	8.47904	9.95349	5.35006	8.96848	9.47081	8.69345	10.8317	9.28698	1.76362	0.985976
mz_0988.7376	8.39655	5.15948	8.17804	7.02427	6.64765	7.79862	6.6364	7.91193	7.68535	8.11018	8.16079	1.23284	0.985976
mz_1388.9310	8.15545	6.50012	5.94735	8.3979	8.43326	6.6481	5.90338	8.11756	6.53276	11.2507	8.5716	1.8253	0.985976
mz_1736.1281	8.9303	8.9792	9.31808	9.2443	8.88141	7.05592	7.01821	8.06372	9.16318	8.94231	7.90131	1.12113	0.985976
mz_0839.6043	15.7971	12.3328	14.6928	14.9007	14.0463	15.5132	12.9005	14.4593	15.6565	15.0389	14.8634	1.34973	0.985976
mz_1957.3574	10.5869	10.4184	10.8749	11.3513	10.5668	9.50593	10.6318	12.1883	11.7281	11.3863	10.8849	1.01059	0.985976
mz_1079.6524	5.5672	9.42801	8.19702	8.99082	7.42317	8.45041	9.44646	7.54463	8.27576	7.85964	8.31284	-1.33691	0.985976
mz_2183.4185	13.5308	12.2875	13.5601	14.0841	14.2518	9.98656	13.4807	13.2882	12.8927	11.7913	13.8359	1.48611	0.985976
mz_1270.9375	6.89741	9.17698	8.26509	7.71369	8.07306	8.69555	9.59282	7.88622	8.83972	9.24829	7.45998	-1.10718	0.985976
mz_1000.6332	18.4458	18.0232	18.3065	18.5458	18.2713	16.9291	17.9822	18.6075	18.5985	18.4782	18.532	0.828351	0.985976
mz_1020.6383	13.931	14.9555	12.3811	12.8656	12.5633	15.8047	13.6606	14.3917	14.6968	11.0102	13.8048	-1.60138	0.985976
mz_1386.0724	8.20527	6.84022	7.12181	7.81332	8.07365	7.06648	5.72812	7.47158	6.55331	7.34912	7.94137	1.02124	0.985976
mz_1765.6950	7.27061	6.94212	7.34508	8.84678	8.10344	8.07738	6.46236	8.38971	8.63131	8.58094	8.93147	1.1018	0.985976
mz_2984.5348	13.6344	13.7128	13.7836	14.8029	13.6453	12.9601	11.3757	13.423	13.2358	13.822	14.006	1.11129	0.985976
mz_1111.7150	12.4536	12.8012	13.988	12.9607	12.108	13.7664	14.9508	12.9925	12.6316	12.2354	11.3313	-1.25185	0.985976
mz_1182.0134	6.73652	7.54443	6.47093	5.42502	5.35125	6.66238	8.09716	6.54296	7.23448	6.06018	6.86588	-1.09875	0.985976
mz_1159.7911	8.33383	7.25642	8.05066	6.73022	8.26434	7.50064	5.83454	7.6563	8.15481	8.25121	7.87758	1.051	0.985976
mz_1862.3304	8.75619	8.41847	5.67138	6.00538	8.50102	8.26408	8.94224	7.08613	7.05831	6.36229	7.68668	-1.40067	0.985976
mz_0770.3254	10.0176	5.43467	9.16224	10.6118	7.9948	7.38781	8.70508	8.3656	8.8519	7.70286	7.72779	1.62847	0.985976
mz_1749.1821	8.64352	9.52961	9.14655	8.7695	7.74078	9.23803	9.44955	8.83521	7.90617	8.30321	8.71032	-0.898821	0.985976
mz_0629.4082	7.83382	8.05157	7.81743	5.39653	5.393	8.46266	7.44963	7.92723	6.57454	5.94138	5.25478	-1.47062	0.985976
mz_1608.4541	11.1976	10.9	11.4261	11.186	11.3968	7.83729	10.2104	10.5821	11.1765	9.96125	10.5229	1.28196	0.985976
mz_1784.2725	7.47188	4.85746	7.07115	7.14187	6.99215	7.86398	4.3264	6.08834	7.42621	7.03141	7.20205	1.37052	0.985976
mz_1497.8621	9.00374	9.66508	9.93839	9.47992	9.52608	8.17683	8.35148	9.868	9.61626	9.86103	10.0252	0.933697	0.985976
mz_0804.5760	15.0267	14.9865	14.7721	14.9524	14.2707	16.9612	15.2114	13.8627	14.2039	15.5944	13.8914	-1.14791	0.985976
mz_1495.1031	14.2476	13.5291	14.1359	15.1375	14.394	14.529	13.4687	15.2245	15.0037	14.7913	15.4864	0.960365	0.985976
mz_1152.7490	9.99151	9.6983	9.18659	9.41446	9.21595	10.5706	10.3815	9.51456	9.44131	9.01443	9.23395	-0.840189	0.985976
mz_1177.6786	16.1286	16.774	17.3413	15.1879	15.8957	16.9595	17.5424	15.9922	15.8941	16.578	15.2215	-1.06204	0.985976
mz_1333.9544	10.1406	8.19521	10.5253	11.7298	8.96429	8.9333	10.1446	9.47609	10.7315	10.5175	10.9028	1.28245	0.985976
mz_2670.7229	10.5702	8.82107	11.0168	9.50611	11.298	9.91548	9.40584	11.1489	9.3695	10.1513	10.8871	1.1127	0.985976
mz_1542.1483	7.87799	8.19562	7.01542	7.449	5.15707	7.8153	8.13009	6.89121	6.3747	6.22448	7.75467	-1.20394	0.985976
mz_0870.6148	9.65865	8.14936	9.27946	9.34736	9.02407	8.51199	8.13663	7.98018	9.53653	9.25834	9.45942	0.927007	0.985976
mz_1742.9824	11.5665	12.4239	10.9666	12.015	12.306	9.75039	9.68324	12.6725	12.0066	11.2391	12.9345	1.34418	0.985976
mz_1473.2667	10.151	8.85528	10.1832	10.2747	11.0881	8.53078	9.81169	10.5781	8.99147	10.9773	9.30634	1.12788	0.985976
mz_1542.0362	8.16795	9.08321	9.26146	6.0275	9.72321	9.85624	10.2493	8.81138	8.00502	8.80046	6.92488	-1.51435	0.985976
mz_1663.2024	8.73459	7.89117	7.49465	8.7072	8.68442	6.75483	7.11979	7.06233	8.22332	9.14926	8.78534	1.09988	0.985976
mz_0647.4670	8.32406	8.90348	8.09909	7.53074	7.7187	8.80902	8.48232	8.55982	7.19167	7.94001	7.01977	-0.933626	0.985976
mz_1314.9547	9.49443	9.96737	9.79036	8.53859	10.0588	10.3558	10.1293	7.50288	9.53029	8.0668	8.61434	-1.20128	0.985976
mz_1290.8268	9.64309	6.68361	8.95821	11.9104	10.6341	7.2237	9.72325	9.32978	9.49791	7.20418	11.8233	1.99826	0.985976
mz_3057.0413	7.59565	8.25786	7.61696	8.11611	7.91971	8.99219	8.41771	6.52909	6.0698	6.1339	8.51671	-1.24368	0.985976
mz_1675.3645	11.8508	10.728	11.6787	11.475	11.7454	9.4532	10.6611	10.5474	12.2185	10.8138	10.5101	1.0742	0.985976
mz_0419.2153	9.56754	10.13	9.71281	10.1377	10.5145	11.6884	10.9193	9.39343	10.2826	9.82199	10.2795	-0.948855	0.985976
mz_0869.3504	7.49697	10.1028	6.01257	7.15714	6.71159	11.8982	6.11251	8.20773	8.3548	7.97198	7.17817	-1.98478	0.985976
mz_1255.8664	8.69932	8.23207	8.62291	8.24057	8.72363	6.72461	7.25891	8.96892	7.23365	8.84782	8.15526	1.03131	0.985976
mz_1351.7913	7.03236	8.52853	4.82558	7.4264	7.29777	7.98789	7.15334	6.50559	6.4145	5.39847	7.58836	-1.32879	0.985976
mz_0524.3194	7.58467	6.6006	6.16661	6.99856	6.70699	6.73718	5.16777	8.79526	7.11017	7.91801	7.88091	1.22663	0.985976
mz_2194.8786	8.02743	8.58086	8.66773	9.45685	8.67642	7.38293	6.62921	8.07037	7.938	9.48654	8.85162	1.11587	0.985976
mz_1524.7415	7.15408	7.73809	5.94113	6.26939	6.14801	12.3366	6.36786	7.56701	6.22456	6.77494	8.06093	-2.04669	0.985976
mz_1575.7554	7.12414	7.42546	6.98752	7.59126	6.5891	13.3684	7.13825	8.5665	5.55091	6.45468	7.359	-2.28281	0.985976
mz_1774.4613	8.54386	8.39856	6.90245	7.28143	7.24907	8.26535	8.75894	7.69191	7.08336	7.10361	8.20516	-0.966678	0.985976
mz_2436.8038	7.39806	5.49004	5.4617	7.59325	7.74427	5.32359	7.46701	7.32526	7.9375	7.74769	7.95879	1.30227	0.985976
mz_0991.6761	7.70086	7.87848	7.67332	9.28347	8.11011	6.9265	7.91617	8.86382	9.40706	9.41367	9.03215	1.11184	0.985976
mz_0762.5726	7.75199	7.0041	8.5909	7.77823	8.68134	8.45093	5.43922	8.77657	8.00342	8.41725	7.5044	1.22326	0.985976
mz_2122.3821	11.5145	10.2971	10.9628	11.1989	10.996	8.48738	10.4105	10.3339	10.7184	10.0054	10.6866	1.07042	0.985976
mz_2199.9177	9.02726	8.32508	10.3599	9.26176	10.2693	9.56845	9.01838	10.1311	9.82973	10.2583	11.0746	1.05585	0.985976
mz_1333.8770	8.70675	8.60415	8.19863	7.49075	9.41937	9.19373	11.2158	9.17365	8.17964	8.25613	7.95812	-1.24835	0.985976
mz_2162.8431	10.4725	10.9953	9.42585	9.95581	9.55447	11.3348	10.9105	10.0273	9.91099	8.22399	11.4279	-1.20535	0.985976
mz_0331.1363	6.96143	7.56906	7.66267	8.53211	8.85081	12.2652	8.3355	7.90025	6.34851	7.68983	6.42626	-1.84342	0.985976
mz_2164.3410	8.29294	8.876	9.27814	9.26941	8.8468	7.43744	6.50202	8.47267	9.14938	7.77271	8.81544	1.13203	0.985976
mz_1766.4226	8.75815	6.85232	10.0397	11.7767	9.55522	6.65703	9.54912	7.95069	7.65932	10.1984	10.0442	1.81164	0.985976
mz_0967.6879	10.6889	11.1158	10.6011	11.1807	11.23	11.7421	11.4044	9.03657	9.12033	10.4828	9.53847	-1.1859	0.985976
mz_1271.7596	14.0874	13.7466	13.8026	13.5587	13.0493	10.7329	13.2575	14.1481	14.0039	14.0328	13.7004	1.21891	0.985976
mz_2181.8571	8.64117	8.22972	6.72046	8.6927	7.52301	5.95206	6.72807	8.11448	8.53312	8.79418	8.61582	1.23441	0.985976
mz_1675.2909	7.40095	6.14813	7.71309	8.72084	8.33567	7.9185	6.46455	8.03492	6.83226	8.08143	8.45101	1.10254	0.985976
mz_1444.9419	9.27771	8.41419	8.3708	9.53292	9.03237	7.88765	8.64793	8.84497	9.36915	9.48219	10.2006	0.947251	0.985976
mz_0930.7369	8.13291	8.35517	8.09959	7.54205	7.89016	9.87772	9.40591	7.22818	9.20256	8.68003	8.37279	-1.0694	0.985976
mz_1162.6497	7.02116	10.1014	5.98778	7.81297	7.35156	8.83355	7.49853	7.58538	6.7408	9.09568	7.74622	-1.39346	0.985976
mz_0481.4040	8.44216	9.99217	10.0764	7.73811	9.64397	9.62646	9.94106	8.12233	9.03119	8.71226	8.14693	-1.11406	0.985976
mz_1399.0486	8.88481	11.0193	9.30711	10.2118	9.38783	10.8259	10.9488	10.8668	10.5589	9.2052	10.4848	-1.06794	0.985976
mz_1554.0209	9.20775	6.39525	8.94179	8.20002	8.9005	9.01043	7.73922	7.87242	9.58041	10.6014	9.16733	1.34399	0.985976
mz_1605.0589	14.1853	13.6806	13.7064	13.9173	14.463	9.11001	13.862	14.1135	13.3494	13.2072	14.8226	1.75307	0.985976
mz_2303.4650	8.60645	8.10977	8.87664	8.08193	8.20212	8.36869	10.7831	6.31492	7.18831	6.98868	6.67128	-1.47091	0.985976
mz_1064.7255	6.88911	9.95751	9.91316	8.10358	8.29799	9.14475	8.92176	9.18027	6.63512	6.2528	5.93549	-1.6904	0.985976
mz_1541.0123	9.80936	6.37184	9.23611	9.66441	8.95422	9.27644	8.82001	9.00051	8.79018	11.3011	9.72096	1.40351	0.985976
mz_1938.4458	7.38685	8.45069	7.25358	7.21083	7.5725	10.3947	6.3473	6.12452	6.83792	6.23376	7.01257	-1.44349	0.985976
mz_1308.8738	13.9281	12.8403	12.8072	13.2937	13.995	12.3223	12.4123	13.2641	13.5267	13.1183	13.1334	0.858324	0.985976
mz_1422.2111	9.85694	9.20106	9.41913	9.55725	8.93671	10.7472	10.7781	8.42829	8.74506	9.86873	8.66641	-1.05729	0.985976
mz_0820.4970	8.51121	6.21515	6.32372	8.24275	7.19222	6.96954	6.12065	6.9146	7.25532	8.56932	7.57366	1.13774	0.985976
mz_0656.4297	4.88922	6.55973	6.23203	7.39109	6.28564	7.2311	7.57041	5.42009	6.00992	6.40852	5.35745	-1.12117	0.985976
mz_2316.5127	6.85464	8.41489	8.48154	6.73103	8.06251	9.88732	9.80143	8.11317	9.20637	8.07028	9.16462	-1.28236	0.985976
mz_1046.6916	11.3832	12.4038	12.2042	11.8313	12.0505	12.5378	12.5174	11.7653	11.2761	11.2533	11.582	-0.818072	0.985976
mz_1033.8981	15.0695	15.321	14.976	15.6185	15.3461	12.9657	14.5132	15.6387	15.8736	14.7692	15.3005	1.05737	0.985976
mz_1784.1727	8.91996	6.47479	7.97086	8.05641	7.87823	7.3113	7.65333	7.65031	7.89348	8.44772	7.67775	0.915367	0.985976
mz_2175.5092	8.0128	10.5391	7.49157	7.14276	9.29566	10.5274	9.53018	8.3952	9.5776	11.1666	7.81269	-1.58703	0.985976
mz_1744.1567	9.62618	5.8803	8.90773	6.72164	9.30017	9.13256	6.73067	9.16908	8.50037	9.00948	8.70685	1.49484	0.985976
mz_2218.9308	7.6655	6.46858	5.83828	7.19061	7.51249	6.81381	4.06258	7.57429	6.33629	6.98499	7.53526	1.29805	0.985976
mz_1485.8973	9.01597	8.49564	9.16825	9.81435	9.56765	8.08175	8.72419	8.54331	9.44663	9.34067	9.36412	0.84876	0.985976
mz_0593.2834	9.79334	10.6368	9.61081	9.29912	10.2815	10.8243	10.1307	9.52265	9.17899	9.87841	9.94715	-0.841616	0.985976
mz_1485.0460	7.14414	6.57716	7.54848	5.92371	7.41177	5.7566	6.51281	7.64125	6.88638	8.26986	8.49822	1.13329	0.985976
mz_1116.9042	6.25218	6.28061	8.07622	8.28362	6.01662	6.57719	4.5578	6.64785	8.20817	7.08663	6.57944	1.33864	0.985976
mz_2231.6446	10.27	7.0102	7.80782	9.39645	9.10014	8.74329	8.1094	9.64082	8.91146	9.74725	8.34372	1.19792	0.985976
mz_0615.1966	11.8682	8.10657	8.65368	12.071	11.0253	8.00905	9.19537	10.1825	9.65628	8.31173	9.16419	1.67962	0.985976
mz_0862.6050	10.0828	7.64795	9.51448	9.84293	8.43994	9.50953	7.1824	9.1005	9.3695	8.64551	9.11121	1.15006	0.985976
mz_2167.3551	8.18109	8.11786	6.3256	7.06262	6.54086	8.05083	8.31378	7.3324	7.81287	7.32274	6.96657	-0.967731	0.985976
mz_1713.4967	11.6979	6.76678	12.6188	13.2922	5.82105	6.6507	12.6714	14.2115	14.0528	12.5766	12.6686	3.42113	0.985976
mz_1350.0278	7.23688	5.4629	7.4628	8.02803	7.16331	7.11774	7.1793	7.31942	7.17206	8.35352	8.51672	1.06995	0.985976
mz_0844.5709	16.5981	14.0425	17.2773	16.2214	15.1828	17.3707	15.2311	18.0667	17.7925	18.9196	17.964	1.70472	0.985976
mz_2165.9032	7.47522	7.0776	7.94022	8.35327	8.85536	8.03159	5.83387	8.92141	8.19202	7.0829	8.20447	1.14709	0.985976
mz_2189.9334	6.84623	5.64966	7.29195	5.45229	8.01091	5.5307	5.96736	7.29363	6.10544	7.32201	6.36787	1.12039	0.985976
mz_1108.0112	9.19398	5.56816	9.34248	9.22001	9.67523	9.40177	7.36981	7.93087	8.33881	10.123	7.96448	1.52702	0.985976
mz_0502.1684	8.00263	9.68004	8.79712	4.31966	7.57335	8.50749	9.81271	7.0288	6.34811	9.65411	8.01615	-1.86592	0.985976
mz_1576.1144	8.60623	8.98098	8.17232	8.84034	9.11386	10.8407	10.433	8.46635	8.63756	10.242	9.52969	-1.13386	0.985976
mz_0905.6226	10.8728	8.95626	10.9194	10.6341	11.2969	8.20623	11.3784	10.8568	11.4247	9.7912	10.5206	1.27594	0.985976
mz_2608.7131	11.4092	10.4635	11.348	11.5648	11.6307	9.79451	10.833	11.1718	10.9567	11.3118	10.481	0.87056	0.985976
mz_0937.3958	6.95228	6.45597	7.73768	4.16411	6.32756	8.08625	11.2285	6.99159	7.78633	6.5781	6.86678	-1.91469	0.985976
mz_1433.7087	8.18162	7.35285	7.45292	7.84258	8.48578	6.95739	5.95123	6.75222	8.1254	7.26975	8.03283	1.01407	0.985976
mz_1044.7568	10.9231	11.5975	11.7858	10.9074	11.958	12.6444	13.546	11.5249	11.9387	11.9033	11.7619	-1.00805	0.985976
mz_2576.2472	9.51865	9.11367	10.1188	10.0869	10.4401	7.45302	9.554	9.27895	8.6806	10.1942	10.6451	1.16353	0.985976
mz_1210.7909	8.48262	11.906	9.46082	9.96605	10.4561	10.6566	10.037	9.83372	10.1599	9.42158	10.2971	-1.10678	0.985976
mz_1110.0785	8.61933	8.2701	8.24478	8.55315	8.03075	12.8722	10.6668	8.33728	9.22601	11.3149	7.22761	-1.90881	0.985976
mz_1604.2469	9.16885	6.13845	7.46195	9.31412	8.16408	6.18216	7.67712	7.18457	6.9578	7.20941	8.06696	1.27506	0.985976
mz_1599.1348	8.81505	7.69641	7.77929	9.8738	8.59083	7.31784	7.60415	9.30568	9.17563	7.7251	7.85701	1.10084	0.985976
mz_1954.2670	8.81061	7.85267	9.22118	8.99113	7.41698	7.08797	7.51879	8.80181	8.93622	7.28078	9.87934	1.18078	0.985976
mz_2360.6599	8.4144	8.02566	7.26495	8.00576	8.53022	5.25628	7.01113	8.81369	8.70788	8.66421	6.51524	1.35019	0.985976
mz_1921.0553	12.8123	12.7926	12.2562	12.6225	12.6111	11.2171	9.02357	11.4949	11.8225	12.6131	12.7063	1.35629	0.985976
mz_0809.6167	15.109	13.165	16.1778	13.8903	14.0592	14.0836	13.8724	15.1277	14.3122	15.9695	14.3965	1.17327	0.985976
mz_1585.8721	13.4966	13.0086	13.3198	13.3334	13.5778	11.0412	12.2762	12.6518	13.0018	12.7286	12.6671	0.988456	0.985976
mz_1832.1575	10.7062	10.6076	9.9084	11.1815	9.717	9.13098	9.13092	11.1558	10.3385	11.3685	11.4272	1.10223	0.985976
mz_1484.0901	9.69478	6.71784	9.06477	10.497	11.5985	10.7962	7.83988	11.814	8.55527	11.2283	9.83025	1.83405	0.985976
mz_1633.8154	6.78505	5.94536	7.54103	6.33775	6.16707	7.07122	4.4753	7.14074	6.94667	7.28286	8.27985	1.2295	0.985976
mz_2952.9803	8.69887	8.72286	6.15055	8.58418	6.73273	8.40518	8.72469	5.71314	6.20616	5.06922	8.56596	-1.65248	0.985976
mz_1979.7577	10.0695	6.03707	11.2052	11.7858	6.34133	6.80903	11.1808	12.3874	10.6383	10.5129	11.4317	2.53754	0.985976
mz_1161.6473	14.323	16.0928	17.0142	13.9436	14.9934	16.4399	16.8204	15.4064	15.5107	15.6394	15.0942	-1.21037	0.985976
mz_0483.3292	14.3384	14.4578	17.2328	14.3915	13.4593	16.4582	17.0018	13.5819	14.1853	13.7873	13.9187	-1.61068	0.985976
mz_2549.2231	8.95176	8.27085	7.67152	9.12361	9.27659	7.60254	7.9009	9.01094	8.79463	8.64611	9.25973	0.917095	0.985976
mz_0950.5025	7.54762	9.93802	10.1313	7.08356	7.5318	9.27069	9.90087	9.51293	8.83135	5.89994	8.32952	-1.59469	0.985976
mz_0811.2913	6.67855	8.2952	6.999	6.04296	7.89361	10.9005	7.16341	7.55832	7.94518	8.03734	7.43585	-1.46252	0.985976
mz_1464.0901	5.73098	8.33335	6.78504	7.98966	7.54281	7.83795	8.49173	8.24579	6.80479	6.49204	7.17205	-1.12562	0.985976
mz_2837.9924	8.81477	7.35713	8.9895	9.06902	9.08662	8.70501	7.57253	8.1319	8.65673	8.47014	8.95079	0.892963	0.985976
mz_0993.7729	6.87066	9.35951	6.89553	7.75335	7.81154	9.63946	8.7148	8.92716	9.79908	8.2617	7.11529	-1.30863	0.985976
mz_0712.3304	12.8294	12.9501	12.6933	12.6195	11.9571	12.9299	13.1417	11.1504	12.0393	10.7433	11.4901	-1.06694	0.985976
mz_2375.6790	10.0511	10.3933	10.7537	11.6541	10.4992	9.50565	10.4816	12.0337	11.0778	11.5659	12.1021	1.09035	0.985976
mz_1728.1523	6.76439	8.27323	7.20816	6.76913	6.69572	6.93127	7.74021	6.07424	6.5341	7.46536	5.88303	-0.973971	0.985976
mz_0881.4172	8.96338	10.5041	7.36553	7.96642	9.53012	13.0439	7.34169	9.04369	7.45063	4.52216	8.63673	-2.36173	0.985976
mz_1438.9732	8.98458	10.5654	9.90843	11.1519	11.1518	8.54439	8.19889	10.204	10.0009	12.4897	10.7284	1.47456	0.985976
mz_1981.6250	8.44197	6.88986	9.92351	7.34365	6.99276	5.72017	6.57395	7.61137	7.14281	7.75703	6.59893	1.33184	0.985976
mz_1755.5437	11.1726	6.63301	12.1121	12.6085	5.68067	6.93138	11.961	13.3729	13.0293	12.1042	12.9208	3.11668	0.985976
mz_1322.8644	8.75576	6.99589	9.53398	8.62126	8.56255	8.18392	7.82725	7.2931	9.39647	9.28187	8.52509	1.07724	0.985976
mz_1594.8208	6.27161	8.9532	8.0916	7.82224	6.14249	6.69404	8.46491	5.9519	6.13738	7.08995	6.52581	-1.28326	0.985976
mz_1444.0323	8.71234	6.56565	8.48222	8.83185	8.22902	7.61578	7.21749	8.6955	6.22769	9.59656	8.34746	1.25736	0.985976
mz_1876.3199	10.008	8.97572	10.2198	9.453	8.9753	10.4355	11.3952	6.79673	7.58065	7.2531	8.74751	-1.63957	0.985976
mz_1808.4696	11.2367	8.66518	11.5801	11.499	7.4035	8.01216	9.5419	9.25469	10.2321	11.1935	13.0651	1.94333	0.985976
mz_1657.2803	11.9316	8.58493	11.8271	10.1223	12.1142	11.744	9.8769	10.4181	11.3905	13.4533	11.6397	1.5435	0.985976
mz_1605.9642	8.56266	9.65182	7.81621	9.77587	8.86465	8.73812	11.6601	9.13676	9.47967	7.78075	7.99363	-1.34041	0.985976
mz_2570.7948	13.2388	11.9237	13.7912	13.4607	12.7705	11.9458	12.7701	12.9975	13.6041	12.1386	13.1804	0.934505	0.985976
mz_1787.0803	6.75932	6.33948	5.18834	5.09659	6.64268	7.31933	7.54614	5.59157	5.60181	6.78942	6.2637	-1.07664	0.985976
mz_1348.8729	7.85401	8.96042	9.43314	6.6287	9.42958	9.45219	9.52293	6.44991	8.03823	8.46531	6.44906	-1.46836	0.985976
mz_1019.6559	11.2452	10.3719	11.9025	9.39444	9.77942	12.0339	12.8619	9.88095	8.26416	10.2195	11.0145	-1.5433	0.985976
mz_1247.0299	7.58225	12.9551	6.20453	8.40971	6.76307	7.79476	7.74543	8.14728	7.32784	8.1355	7.86935	-1.94349	0.985976
mz_0776.3360	7.16477	3.37536	7.79782	7.21478	6.4551	6.9268	7.01227	8.11394	6.53594	6.80532	8.13391	1.50622	0.985976
mz_1675.1661	7.69243	8.99695	4.87446	7.24687	6.20892	8.0152	8.65149	7.92658	8.07705	6.62739	8.39933	-1.42292	0.985976
mz_1485.9736	10.9657	13.2086	10.4936	11.9607	13.103	14.5755	13.5992	11.4714	11.6856	14.1973	13.7676	-1.58882	0.985976
mz_2566.7635	11.9482	10.8188	12.2256	10.8052	11.439	9.53238	11.5361	11.6722	11.6459	11.7263	11.5688	0.999818	0.985976
mz_0445.3088	7.83122	8.24458	9.441	8.22123	9.8357	8.18762	7.15747	8.83106	9.31243	9.40624	8.51248	1.06069	0.985976
mz_1701.4967	10.3806	8.3598	10.8935	12.0631	8.17582	6.57753	11.5395	12.9369	12.6174	10.0238	11.1959	2.21026	0.985976
mz_1288.3308	7.45313	10.0563	7.40501	9.12198	7.59466	9.65773	9.42675	10.0565	9.34964	8.24813	8.54802	-1.24145	0.985976
mz_0890.5764	10.7267	8.59509	10.4923	9.45374	8.75161	8.34127	9.10553	10.001	8.7024	9.94638	9.85694	1.06076	0.985976
mz_1081.6839	9.11718	9.22534	9.80845	10.089	10.0873	8.76316	9.63196	10.2739	10.4366	10.681	10.363	0.900216	0.985976
mz_1136.6297	7.86084	8.39363	7.73783	8.7807	8.41172	9.00941	11.3392	7.75726	9.14794	8.76714	8.31229	-1.23378	0.985976
mz_3014.5128	8.72443	8.60618	8.36617	8.94739	8.63691	8.51933	6.30057	9.91162	8.96272	9.23008	8.65425	1.1205	0.985976
mz_2793.0237	9.19173	5.80132	8.77436	9.07289	6.95508	8.21303	8.46761	9.56344	9.53218	9.69877	8.43716	1.40921	0.985976
mz_2036.2843	6.4904	7.82181	6.62317	7.43365	6.16168	7.81389	7.88408	5.72088	7.2706	7.46735	7.5334	-1.00229	0.985976
mz_0693.5311	12.3799	15.2615	13.2584	14.3963	13.2036	13.3198	15.2022	13.3682	11.691	12.9014	14.6583	-1.36237	0.985976
mz_1168.8210	7.86855	8.19774	8.19601	8.91391	8.67985	7.57576	6.59599	8.56354	7.78286	8.63756	8.50722	0.937192	0.985976
mz_0495.1273	5.6269	8.28912	4.46672	7.72924	8.18151	7.84586	8.03237	5.5037	7.70482	5.86375	7.06911	-1.53757	0.985976
mz_1874.3042	9.94664	9.07753	7.89058	9.09633	9.57469	10.3134	11.838	9.32311	5.84128	9.18871	8.91191	-1.68798	0.985976
mz_0548.3496	8.24306	8.75158	8.13036	8.73179	7.92596	9.29579	9.03874	8.68108	7.43934	7.8111	8.39176	-0.859396	0.985976
mz_0667.5636	15.1086	14.9536	14.6085	15.1159	15.2917	15.3507	15.9633	13.5571	13.4241	13.6857	13.4987	-1.13626	0.985976
mz_1566.1055	7.92635	9.45919	7.84328	6.76118	9.83077	9.50643	8.68557	7.74523	8.01584	8.40065	7.97777	-1.15443	0.985976
mz_1199.9200	6.66515	7.75858	6.72008	7.77768	7.79083	8.64994	7.72809	6.47582	6.58197	7.83099	6.45373	-1.0085	0.985976
mz_1333.2204	11.2008	7.83377	11.1614	9.50138	9.6153	8.84735	9.58023	9.36554	9.06253	10.3797	9.43731	1.21172	0.985976
mz_0895.5728	7.77994	9.50656	8.19096	8.87481	9.01986	11.1376	8.87386	9.20277	6.89532	9.95179	6.59137	-1.52599	0.985976
mz_1521.1912	6.80813	7.42251	6.53953	4.91074	7.17853	8.13242	7.94852	6.69262	7.42184	5.44971	7.77396	-1.2376	0.985976
mz_1026.7427	16.2385	15.937	16.449	16.4587	16.4256	14.7737	16.1241	16.5705	16.7497	17.3512	15.9826	0.916652	0.985976
mz_0607.3969	9.28817	10.1588	9.03261	10.1948	8.76352	9.58198	10.9735	9.24518	8.29388	10.0526	8.49463	-1.06743	0.985976
mz_1008.7122	12.67	12.7411	12.7818	12.8675	12.9464	11.017	10.2734	11.6116	12.1325	13.8201	11.7732	1.23154	0.985976
mz_2215.7013	8.90682	6.70537	7.83945	7.80256	7.89568	6.71133	7.95232	7.61956	8.43004	8.66265	7.55362	0.965789	0.985976
mz_0950.6128	12.3193	11.3919	12.528	11.6554	10.5101	9.93278	10.9075	11.9396	11.2106	12.328	12.0264	1.07061	0.985976
mz_1002.7615	8.80135	7.25194	8.00039	8.67067	9.35227	8.50167	7.94666	8.43661	10.7914	9.29098	9.14673	1.16121	0.985976
mz_1347.0694	7.24584	7.44115	8.58289	8.90317	8.75894	8.24187	7.41862	8.97239	9.22592	9.15629	8.68578	0.990854	0.985976
mz_2134.8621	9.33316	9.36957	9.18277	8.99645	10.8258	7.41804	7.81476	9.28927	10.6066	8.07345	9.50709	1.27603	0.985976
mz_0801.5640	7.89179	7.7585	8.04723	8.19058	7.80891	7.08733	6.96299	8.10403	8.01824	7.9867	8.26114	0.768969	0.985976
mz_1923.6951	10.4699	7.3951	10.8643	11.7558	7.96578	7.87737	11.0252	12.6587	10.9171	9.50883	11.7013	1.96431	0.985976
mz_0957.5839	10.1384	10.1724	9.78385	8.45271	9.25153	11.1332	9.81967	7.72678	6.55637	10.261	8.62381	-1.52577	0.985976
mz_1027.6328	5.45518	8.07137	5.3742	7.43523	6.8086	7.08703	7.72051	6.41404	7.73545	6.63827	5.70388	-1.1807	0.985976
mz_1463.8870	10.3507	10.3804	8.06614	8.82029	8.0013	9.70075	9.4896	7.26424	9.24318	8.34555	9.01397	-1.21874	0.985976
mz_0979.5037	15.5536	14.783	15.9218	15.025	15.3352	15.161	13.1503	16.1236	14.5014	15.3426	15.5557	1.05508	0.985976
mz_0898.6284	8.99216	8.97979	9.36338	9.60851	9.69932	7.55897	8.88837	9.42943	9.10512	9.42095	9.16816	0.872673	0.985976
mz_0997.6105	8.93477	7.12712	8.93941	8.56127	7.98493	7.39293	7.37484	6.9267	8.59938	7.98486	8.32235	0.983412	0.985976
mz_0636.6051	11.0788	10.8744	10.9567	10.8693	11.0075	8.45867	10.7367	10.4867	11.4623	11.8655	11.3392	1.11001	0.985976
mz_1520.1741	8.86588	9.90384	8.15366	6.77792	10.1537	10.8248	10.9605	9.21582	8.33177	10.7802	10.0265	-1.52486	0.985976
mz_0618.4739	9.08215	12.8064	8.31252	9.83024	9.56283	12.4897	9.68101	9.87234	9.81322	12.9581	6.60005	-2.15511	0.985976
mz_2991.5437	10.3535	9.1342	8.36553	9.79955	9.47368	9.29952	6.4228	8.98931	9.77372	10.0081	9.91039	1.29871	0.985976
mz_1334.8840	10.1783	11.745	13.235	11.2428	13.0626	13.6691	14.1809	10.9777	11.8771	11.9897	11.4998	-1.44048	0.985976
mz_2979.5132	7.77646	7.04741	8.77227	8.58797	8.81308	6.95418	7.03782	7.88516	6.94685	7.72862	7.47315	0.984809	0.985976
mz_0565.3593	8.63862	7.59231	8.46464	9.2101	8.78414	7.00857	7.37753	8.90891	8.22152	9.33781	6.44563	1.17528	0.985976
mz_1203.8316	6.72123	5.58723	6.90386	7.78363	3.82586	3.61467	6.26724	6.88832	7.65615	7.29248	7.27895	1.63743	0.985976
mz_2809.0550	11.7963	11.1993	11.9027	11.7552	11.064	10.3764	10.6721	11.7586	11.4118	11.4952	11.2668	0.807086	0.985976
mz_1661.5085	10.7095	7.95258	10.796	8.55858	12.7212	8.98945	8.23655	12.3633	12.2016	6.69005	10.8831	2.22256	0.985976
mz_1001.7692	6.94717	7.55097	7.24949	5.91169	6.58815	9.42496	8.85715	9.13053	6.50729	8.38528	7.12338	-1.38065	0.985976
mz_2827.1020	6.19771	6.217	7.61988	7.43165	7.66543	6.77151	7.12769	8.23162	8.69692	8.32107	8.15901	1.08501	0.985976
mz_1560.8405	13.1843	11.2665	12.7618	12.2654	11.4793	10.5438	11.4083	13.6161	12.2119	10.7765	11.8715	1.198	0.985976
mz_1512.1184	8.08294	8.05334	9.17722	8.24215	8.44119	6.61668	7.36663	9.00402	7.64503	9.01327	7.47919	1.04008	0.985976
mz_0975.6410	7.32892	8.88013	7.70731	7.52619	8.34935	9.27058	8.64068	7.9575	8.98992	8.05556	8.27491	-0.906755	0.985976
mz_1418.4192	10.5315	6.92539	9.20966	7.71695	9.21059	6.31934	8.06738	7.59949	7.59852	7.24858	9.6338	1.48959	0.985976
mz_1356.9743	8.28599	7.68628	4.06566	7.97898	8.6952	3.88513	4.80742	7.85331	6.3202	8.72315	8.14971	2.04941	0.985976
mz_2042.9299	8.18637	7.35712	8.10301	8.22453	8.08212	8.22108	6.81134	8.33896	8.57368	8.14937	9.00197	0.869322	0.985976
mz_1452.9106	11.7445	11.6725	11.6382	11.7385	12.4137	9.58097	11.6104	12.5642	11.4694	12.2817	12.1176	1.04136	0.985976
mz_0841.5658	14.4161	13.5045	17.0728	14.459	16.6841	15.7141	14.332	17.1471	15.1209	16.6904	16.4528	1.48852	0.985976
mz_2874.8395	12.1596	12.6097	12.8439	13.3769	13.3969	10.8282	12.7354	13.514	13.4006	12.8831	13.0629	1.02199	0.985976
mz_0880.5206	6.06894	8.09968	6.43049	6.64269	6.95872	8.38993	8.10374	7.18269	8.19138	8.02168	7.66181	-1.05298	0.985976
mz_0875.5808	14.9865	12.6435	14.7152	14.0596	16.1494	14.3772	12.8236	14.0359	13.5972	14.6946	13.7307	1.21471	0.985976
mz_1322.3641	8.35014	6.95932	7.79094	6.66503	8.56282	7.25067	6.51302	8.02865	7.5129	7.64469	8.49452	0.973541	0.985976
mz_2282.5437	8.23129	8.82759	9.19088	9.11641	6.9709	9.13372	9.54268	6.15465	8.51773	7.53007	6.26591	-1.42077	0.985976
mz_2220.3097	10.5548	9.89974	9.65248	9.97056	10.8159	9.74237	7.73391	10.7036	10.6238	9.12762	10.7485	1.14931	0.985976
mz_1346.2502	8.77455	11.3817	10.3246	9.19337	10.2679	11.2764	10.7896	8.23379	10.1214	11.8769	9.62842	-1.34662	0.985976
mz_1163.7380	9.12663	8.73803	9.21191	8.28131	7.95793	10.1198	9.48988	8.24376	8.81789	7.58112	8.49446	-0.98485	0.985976
mz_0635.4892	9.43196	7.43076	7.09023	8.54189	9.03614	7.93059	7.84239	9.09383	8.67517	9.82978	8.92203	1.09305	0.985976
mz_2505.2068	4.40152	8.68275	7.89447	7.63344	8.05935	8.87051	8.80989	4.01721	7.96928	7.60698	7.92963	-1.84873	0.985976
mz_1168.8245	7.50139	7.06946	8.27348	6.87133	7.20346	6.23463	6.8527	7.70737	7.19396	8.3949	8.08836	0.935351	0.985976
mz_0912.5608	9.95966	8.35393	9.32129	7.80903	9.73728	8.14856	7.77096	9.2602	8.06723	9.42195	10.3749	1.15279	0.985976
mz_1160.7916	7.59706	7.72171	8.39363	9.32722	8.20939	6.66781	8.07162	8.44116	8.67871	8.74177	8.16726	0.957474	0.985976
mz_1271.0135	9.5512	6.77169	8.07397	7.69763	7.61444	8.00365	6.8032	9.85708	7.23591	8.99682	8.53502	1.25241	0.985976
mz_1972.8247	9.93797	10.3343	7.21354	8.05295	10.6122	11.5707	8.21989	8.35235	7.78485	6.13177	7.18157	-1.88324	0.985976
mz_1551.9443	5.20224	6.92318	6.01409	6.72364	7.61854	7.47368	8.62258	7.34637	6.58137	4.24608	6.44136	-1.40144	0.985976
mz_1562.1620	8.63423	5.92081	7.92714	6.36084	6.38578	5.44212	6.09326	8.06097	6.52347	6.2383	6.26401	1.23061	0.985976
mz_1509.8984	10.3817	9.43325	10.2787	10.6408	9.44027	9.93234	8.0358	10.2487	9.91613	9.65224	10.2925	0.972581	0.985976
mz_1008.6607	7.91669	7.69371	8.44955	6.7486	6.19076	8.73515	8.72922	8.09163	6.41495	5.87698	7.46074	-1.24229	0.985976
mz_2966.9596	8.58385	8.54549	9.02529	8.58225	9.17774	7.11429	6.95285	8.22396	9.2245	7.23687	8.82597	1.07251	0.985976
mz_1157.8236	6.85797	8.17537	8.82892	9.2613	7.19801	6.7884	6.63682	8.73343	8.63333	9.12893	8.81669	1.23212	0.985976
mz_0976.8304	7.39823	10.3144	8.35119	9.75619	10.7214	5.79512	7.16672	9.59066	10.8937	9.92038	10.4196	1.87267	0.985976
mz_0654.1922	10.6311	9.67674	7.75102	9.81678	10.5679	10.2948	13.5872	10.5185	8.48545	8.72758	9.2034	-1.72353	0.985976
mz_1669.2494	8.5675	11.3135	8.51351	10.1065	9.42326	9.86241	9.66839	10.2355	8.67108	8.47782	9.29328	-1.12038	0.985976
mz_1189.0088	8.17789	9.13328	8.0913	7.68022	8.29379	9.81477	7.89488	7.91773	7.95628	5.42129	7.78652	-1.28201	0.985976
mz_0274.2741	12.0551	10.9678	10.9564	11.5966	12.0377	9.72363	10.8087	11.875	11.6837	11.2222	10.4298	0.982002	0.985976
mz_1273.9437	9.27786	6.0582	8.86908	8.31262	8.16397	7.38726	8.1257	8.35519	8.01402	7.00217	8.52653	1.12479	0.985976
mz_1546.9368	8.77543	6.47093	7.60311	8.43228	8.45272	7.58258	7.03439	6.73366	7.89347	7.84844	8.8106	1.03941	0.985976
mz_1950.4474	9.63088	10.1036	9.45176	5.61616	8.0829	9.67384	9.71879	9.75065	8.34667	7.65778	5.7099	-1.80124	0.985976
mz_1045.9035	6.91844	7.85301	7.0625	7.15238	5.61266	7.75517	7.94206	7.97624	7.23381	6.61533	5.98119	-1.03101	0.985976
mz_0867.4748	9.15731	9.32748	9.56818	8.77299	8.24078	7.15166	7.48983	9.18935	9.57284	8.64813	9.1914	1.05297	0.985976
mz_1346.0108	9.52426	5.89702	6.85515	7.87424	7.80695	5.20619	7.2518	6.64534	6.80152	6.48657	7.75651	1.35048	0.985976
mz_2990.0229	10.5125	10.6673	7.97038	10.0189	9.83052	10.7723	10.8896	10.5623	9.46507	9.16471	9.89839	-1.09855	0.985976
mz_1604.0636	14.6882	14.1112	13.464	14.4491	15.5294	9.9096	14.4568	14.6998	14.0185	13.8383	15.6019	1.7103	0.985976
mz_0798.5502	10.4203	11.1224	10.251	9.25137	10.3293	11.1437	10.9338	9.77243	10.8921	10.3429	10.365	-0.86358	0.985976
mz_1524.0527	7.01243	3.91764	7.25939	7.63576	5.51087	7.32187	6.12499	8.94672	7.64354	7.96895	6.64958	1.54024	0.985976
mz_1429.0016	8.69964	9.43669	8.0431	8.38017	8.15964	8.54863	10.015	8.66497	7.09798	8.3976	9.13867	-1.01072	0.985976
mz_2622.2527	9.98358	8.30264	9.7333	9.29672	10.5146	7.93639	9.00793	8.33511	8.5259	9.55918	9.89565	1.06485	0.985976
mz_1757.5593	10.9484	7.20385	11.9316	12.353	7.15869	8.35144	11.7012	13.0217	11.6343	11.7963	12.4327	2.32411	0.985976
mz_1797.1147	15.3525	15.1947	15.7561	15.2039	15.6298	14.6194	14.6432	15.7772	15.486	15.6502	15.7727	0.759459	0.985976
mz_2136.5186	10.9701	11.3905	11.336	10.3318	10.4105	11.4725	11.7837	10.8509	10.7386	10.8798	10.5795	-0.786744	0.985976
mz_0775.3605	9.8373	9.37808	9.33037	9.12935	7.12544	4.95989	8.3843	9.6916	9.3775	9.79142	9.83379	1.6905	0.985976
mz_1402.8834	4.39973	7.28917	4.45598	7.63525	4.09268	8.09304	7.81403	7.39848	6.48828	5.82033	7.82208	-1.71798	0.985976
mz_1760.4569	11.0969	10.8395	11.6486	11.2792	11.4271	10.2001	10.185	11.5363	11.8014	10.1649	11.4568	0.893205	0.985976
mz_1528.0933	11.6962	13.1421	13.1935	12.5826	12.961	13.7055	13.4297	12.7173	12.7282	12.3925	12.2896	-0.855676	0.985976
mz_1475.6676	7.41283	8.06373	7.06511	8.24109	7.64091	8.17803	8.7262	8.16613	6.49689	7.02057	6.00364	-1.06676	0.985976
mz_1824.5610	7.14568	6.84351	8.31559	9.0569	7.56853	7.97599	2.3079	6.84587	6.61056	8.29404	7.37655	1.94258	0.985976
mz_1910.7890	9.91058	12.5307	10.5187	10.2304	13.1094	13.5443	10.231	10.2686	9.45136	10.0691	10.4853	-1.59662	0.985976
mz_1274.2424	7.69123	8.32965	8.40972	7.93337	10.005	11.2355	8.8867	7.54355	8.09668	7.73212	7.62587	-1.35426	0.985976
mz_1072.0855	7.48636	7.07339	8.88404	8.81335	6.70475	6.9975	8.52475	11.1571	11.2833	10.9778	11.9611	2.12659	0.985976
mz_2577.7193	8.53052	7.74723	9.28842	10.083	9.65083	8.60602	8.94415	9.36541	9.5324	8.69455	9.9455	0.953868	0.985976
mz_1343.3856_1	11.1828	13.0823	12.5861	12.2995	13.1905	13.5201	13.9787	12.2817	13.0762	13.309	12.0897	-1.02511	0.985976
mz_1962.4177	8.02973	7.69143	8.95905	8.82301	8.91458	7.81206	5.57702	7.73383	7.60421	8.1009	7.34905	1.16246	0.985976
mz_0455.3343	9.04402	8.12668	8.85536	8.77669	8.87106	8.49243	7.18794	9.08454	8.52757	8.39014	8.58019	0.830512	0.985976
mz_0774.5619	12.183	12.51	11.9049	11.2334	11.6268	12.9981	11.4905	11.2169	10.6339	11.05	11.1554	-0.957339	0.985976
mz_1272.9435	10.2102	5.19286	8.91969	8.34013	9.19482	9.77867	8.70831	9.41999	9.93389	9.57031	10.6801	1.64035	0.985976
mz_0655.4419	5.35203	7.94436	7.10944	7.9575	6.98683	8.34769	8.43652	8.14715	5.77067	7.32197	7.52359	-1.22171	0.985976
mz_1564.9699	5.87544	7.62918	7.01922	6.90222	8.04396	8.20338	7.9435	6.65644	7.31981	4.86729	7.0859	-1.20407	0.985976
mz_0867.6321	8.09671	4.16666	6.82412	9.25118	8.93299	5.93021	8.33157	8.67357	5.68734	7.64918	8.17029	1.76786	0.985976
mz_1217.0546	7.58009	9.0504	7.22823	8.87457	8.09214	8.90207	8.68636	6.77559	6.89104	8.71197	8.28547	-1.07472	0.985976
mz_2304.5339	9.96342	10.6712	10.8094	10.5738	10.805	10.9748	12.9204	9.57021	11.2223	10.111	10.3395	-1.09782	0.985976
mz_0633.5300	8.4326	8.48702	7.73732	7.71083	7.13505	10.056	8.26839	8.27594	8.3328	8.45079	6.76004	-1.08271	0.985976
mz_2196.4670	6.58244	6.7755	5.82666	6.68132	8.25716	5.94446	5.22288	7.33153	6.80211	8.07007	7.52549	1.15365	0.985976
mz_3133.0715	9.12782	8.28861	8.8662	8.58742	9.32594	5.27873	8.60568	9.03493	8.38783	7.65879	8.65065	1.31394	0.985976
mz_0914.5764	8.54818	6.94287	7.7561	7.84217	5.46654	6.35034	6.6047	8.65571	8.62921	8.20522	8.07973	1.26522	0.985976
mz_1517.0354	10.03	10.1266	11.3632	10.8071	10.7448	9.63955	10.0622	10.2818	10.7291	11.1181	11.3977	0.866196	0.985976
mz_2292.5339	9.66926	8.25739	11.7765	10.7278	9.14165	7.1781	9.82474	10.012	10.2652	9.57492	8.06197	1.48358	0.985976
mz_1607.1246	7.72375	7.06645	8.64434	8.48351	8.55891	8.77281	6.11925	8.37251	8.11784	8.3281	8.80296	1.05949	0.985976
mz_1596.4178	8.44527	8.10048	9.29334	9.73042	10.0058	7.68009	9.82822	11.5312	11.1089	9.08118	10.155	1.38263	0.985976
mz_2158.8539	9.36561	8.4231	9.68674	10.0237	9.84586	8.36446	9.60031	9.89234	9.71993	9.77736	8.97318	0.864641	0.985976
mz_1343.9622	9.92665	8.60535	9.74553	9.78102	9.37068	10.006	7.07071	10.0816	9.26839	9.47923	9.54503	1.08907	0.985976
mz_1875.0247	8.0229	6.58748	5.42456	8.00286	8.01786	6.49146	6.76462	8.56036	7.89953	8.45277	8.34737	1.22651	0.985976
mz_0453.2858	14.4398	13.5881	18.1413	14.1143	13.875	18.0638	18.3641	13.8063	14.2763	13.4882	13.7569	-2.18474	0.985976
mz_0989.6852	7.78391	6.7408	8.43572	10.4844	8.57722	9.17033	8.04618	10.6729	9.77179	9.86013	9.49179	1.39896	0.985976
mz_0842.6141	12.3386	12.6929	14.1661	11.862	14.5777	15.507	14.862	10.2359	12.9494	13.1531	10.7809	-1.84603	0.985976
mz_0709.3909	7.56374	6.54191	5.53701	6.21152	5.83213	8.10205	8.87135	7.64688	6.93211	6.43616	6.84169	-1.21328	0.985976
mz_1574.8197	13.9973	12.0443	14.2791	14.192	13.9738	13.8537	12.6313	13.8269	13.503	13.2241	13.3105	0.945235	0.985976
mz_0596.3769	8.23124	6.93725	9.41349	8.40988	7.81811	5.99161	6.52079	7.96207	6.19527	9.43038	6.0978	1.46156	0.985976
mz_1175.9457	6.46045	7.66043	5.86354	7.97593	8.94125	5.28622	5.42018	8.43293	7.48883	8.6143	7.00794	1.47587	0.985976
mz_2370.5046	7.1412	8.00222	6.80377	6.41223	6.9529	7.69817	6.88329	5.80504	6.28685	6.52301	7.13214	-0.895752	0.985976
mz_1673.4654	9.44877	8.66593	9.7164	11.243	10.2201	7.12349	11.2686	11.2785	10.1678	10.762	11.4931	1.52187	0.985976
mz_1620.8001	9.45212	8.8174	8.5772	8.98038	8.99015	7.48929	8.06377	8.33338	9.33694	8.88715	9.62289	0.899038	0.985976
mz_1152.8906	9.17817	9.73001	8.80678	10.069	8.70811	7.11858	8.46604	10.3224	10.4048	9.70838	9.78141	1.18417	0.985976
mz_1075.8698	8.43692	4.3362	6.9225	7.58807	8.27321	7.71222	6.50412	7.70567	6.72661	7.24211	7.02773	1.30617	0.985976
mz_1591.7684	7.03178	8.56858	4.59737	7.63384	7.64205	7.41643	8.19571	6.42422	7.90543	6.01438	6.62314	-1.32621	0.985976
mz_1676.0848	6.83615	5.33045	6.71032	5.98111	7.59031	5.83598	5.30261	5.38095	6.17194	7.34224	6.12909	1.02808	0.985976
mz_0793.5389	10.9692	9.98271	10.7811	9.71497	10.5973	10.5819	8.9743	10.6744	11.2835	11.3989	11.1989	0.980969	0.985976
mz_1507.1173	17.7344	16.6043	17.2147	18.1209	16.5925	17.4511	16.4694	18.4099	18.2636	18.1601	18.0302	0.974166	0.985976
mz_1412.0213	13.7209	13.6072	13.1485	13.4162	14.27	12.8547	12.969	14.2369	14.4369	14.8112	14.6483	0.94247	0.985976
mz_0535.3640	9.5949	9.99404	9.77435	10.3727	9.37897	8.92924	7.89919	10.5289	9.64758	10.0722	9.97571	0.977347	0.985976
mz_1462.0493	8.91699	7.3244	9.53449	9.30221	9.31875	8.75626	8.73425	9.14814	8.65499	9.02009	9.22855	0.868891	0.985976
mz_1294.7564	7.75673	5.59659	8.17614	8.92667	7.20411	8.56068	8.03155	9.58332	10.106	10.4017	9.77161	1.59452	0.985976
mz_2853.5800	11.5725	11.5301	11.6547	11.7173	11.3688	10.1165	11.1949	11.9984	12.2462	11.7846	12.0453	0.851303	0.985976
mz_1647.2968	7.60822	8.00684	6.37748	7.60479	8.72246	5.68826	6.59888	8.4122	8.07062	8.24625	8.92691	1.23145	0.985976
mz_1075.5902	6.1434	6.53432	7.25744	6.2693	7.55195	6.31438	6.15029	8.04064	8.12675	8.40329	7.59109	1.08999	0.985976
mz_2784.9153	7.55678	8.63519	8.48861	7.62055	6.39295	8.78009	7.9863	6.89489	7.78093	8.00204	7.10788	-0.986614	0.985976
mz_2308.5288	6.30196	8.22247	5.43812	6.88292	7.39917	7.81774	7.49995	7.03632	5.72452	7.8136	7.32403	-1.10664	0.985976
mz_1135.6469	10.9644	9.04643	11.0666	11.2041	10.4834	8.112	11.8535	12.0832	10.3019	10.5954	11.8455	1.39743	0.985976
mz_0772.5181	9.26763	11.2922	11.0645	6.27676	10.0672	12.1008	10.6338	10.5974	10.7005	9.63154	9.62986	-1.68788	0.985976
mz_1392.9623	7.09757	6.26469	9.0416	7.98703	8.21223	5.9367	8.59275	7.28857	9.07947	9.15644	8.05394	1.30822	0.985976
mz_0819.3574	5.86588	8.11204	6.47586	6.68918	6.19743	8.03316	6.65152	7.01747	7.32745	6.99405	6.63419	-0.948719	0.985976
mz_1598.2197	9.67409	7.21695	8.56691	8.64658	7.9963	5.84076	8.47332	7.55953	8.90687	7.89211	7.83144	1.20722	0.985976
mz_1447.3966	5.56549	8.49954	5.59099	6.11794	6.1781	8.93401	6.89434	6.44243	8.77001	8.31902	4.87227	-1.62727	0.985976
mz_1154.9380	8.95363	6.21246	8.10615	6.73491	8.56122	7.14781	6.35675	9.65744	8.6346	5.39493	9.84979	1.66424	0.985976
mz_1059.6872	8.12492	11.1865	8.91974	8.74272	8.26965	10.3815	10.8135	9.82926	10.9785	10.2353	10.7	-1.3188	0.985976
mz_1120.9336	8.4228	5.99328	8.68224	6.97341	7.92568	7.12716	7.02933	6.96939	6.84224	8.94684	8.00144	1.12892	0.985976
mz_1075.8909	9.06061	10.2237	10.168	10.1985	9.86887	10.6623	11.0842	8.79472	9.98214	10.3501	9.3831	-0.930985	0.985976
mz_1659.5014	10.4488	8.58855	10.4557	12.1621	10.1785	7.93927	9.78702	9.9019	11.7128	7.49358	10.8926	1.63414	0.985976
mz_1472.0337	8.75829	8.20226	9.0018	7.98315	9.11086	7.26042	5.49937	8.77603	6.03139	9.28754	8.52941	1.44746	0.985976
mz_0707.5045	8.82573	5.68867	8.68659	8.72905	7.44679	8.90586	7.90589	8.63499	9.75937	9.13318	9.11757	1.29152	0.985976
mz_1658.2786	13.2897	9.47187	11.8416	11.2169	10.5576	13.3261	7.62501	12.3198	11.6294	14.3562	12.417	2.06254	0.985976
mz_0674.3957	7.6415	9.54956	8.02784	8.75929	9.34579	8.74524	8.73568	6.97703	8.06768	5.89868	6.4217	-1.36772	0.985976
mz_1253.9353	10.9664	10.3598	9.68553	10.3544	10.0715	11.4353	11.2582	9.25701	10.5409	10.0913	9.73787	-0.929659	0.985976
mz_0613.5319	8.95836	6.86269	7.90794	9.0529	8.5264	8.83742	6.3827	8.42836	8.37807	7.77927	8.44777	1.07395	0.985976
mz_1465.0616	6.69883	9.00121	5.10513	7.3773	8.91303	8.60562	9.47022	8.49287	8.04186	8.67146	7.38025	-1.44059	0.985976
mz_0659.5409	12.3319	13.5453	13.8223	12.9994	13.3922	14.0203	13.6118	12.6606	12.8684	11.31	11.6443	-1.09715	0.985976
mz_1889.4994	4.55811	7.43872	6.67357	6.18741	5.45979	8.07362	8.21732	8.92246	7.57991	6.17441	5.37333	-1.54376	0.985976
mz_0991.6035	9.93227	9.73972	8.39283	8.60214	8.80222	10.4045	8.9186	9.05747	7.27855	5.70157	7.68963	-1.50554	0.985976
mz_2657.7092	8.86767	7.38325	8.84384	9.38476	7.34812	7.48412	8.02831	8.28581	8.71126	8.56449	8.46007	0.926359	0.985976
mz_0478.2939	12.2195	10.0345	14.2126	11.3742	9.44969	14.3113	14.9145	9.62309	10.5706	8.91978	7.34823	-2.62208	0.985976
mz_1474.9707	8.09785	8.57623	8.4782	8.43141	8.47661	5.32535	7.90942	8.14241	8.80822	8.23739	8.93428	1.18046	0.985976
mz_1816.8937	4.85957	7.51781	7.14664	5.32089	6.67826	11.5834	5.98862	6.99795	6.90436	6.32958	7.44538	-1.90295	0.985976
mz_1890.3965	6.94443	8.13501	6.99613	8.37905	6.39792	7.43509	8.01866	6.6042	6.45189	7.0015	6.32023	-0.975998	0.985976
mz_1115.6653	8.38463	6.61124	9.54504	9.50185	8.90283	8.54149	9.21634	9.12055	9.39647	9.65054	9.10116	1.07736	0.985976
mz_0701.4787	11.1054	11.1796	11.3564	8.59277	11.5963	9.2309	7.42548	11.1824	10.9229	10.7154	10.9039	1.51826	0.985976
mz_1345.4013	7.65474	7.07265	7.52008	7.61501	6.99283	4.76651	6.01038	6.93495	7.02666	7.18076	5.64371	1.12125	0.985976
mz_2931.4920	6.42569	8.28867	5.50039	6.54635	7.71343	7.36578	7.585	6.79953	4.09593	6.29909	7.64114	-1.36879	0.985976
mz_2346.4834	5.11663	7.40498	7.32296	6.25265	7.38561	7.71215	9.65428	4.54351	7.72549	8.05004	7.12377	-1.56706	0.985976
mz_1134.6390	10.3133	11.1789	11.3337	9.87053	10.2816	11.4131	13.5267	11.7471	11.7473	9.99576	11.1337	-1.23667	0.985976
mz_3144.4303	8.8105	8.04696	8.37791	9.32895	9.3532	8.42671	7.72954	8.49876	8.71887	8.76931	9.10857	0.803024	0.985976
mz_1701.1892	9.54448	10.5088	9.00633	11.756	10.3449	8.14832	9.12973	10.8298	10.5133	11.1196	11.5148	1.31635	0.985976
mz_2901.8731	10.0422	10.0832	10.027	11.3278	10.6262	6.22366	10.052	10.4461	10.518	9.48913	9.63617	1.47777	0.985976
mz_1066.0886	10.0082	11.3833	9.83775	10.0025	11.1392	11.2114	10.9073	10.1833	10.7431	10.1677	10.5992	-0.832204	0.985976
mz_1422.0597	8.23193	7.53866	9.04611	7.748	8.40273	8.13476	6.36155	8.41084	8.52993	7.68032	8.26152	0.943931	0.985976
mz_2150.8671	13.4518	12.7916	12.8919	12.99	12.4706	11.7378	11.3178	11.7568	13.3533	13.0395	13.5618	0.990405	0.985976
mz_1444.2037	8.12207	6.55275	7.67311	9.51508	8.5603	6.01764	6.7816	6.4673	7.93298	5.76309	8.96298	1.42395	0.985976
mz_2331.5515	8.61281	9.02262	8.30904	9.01536	9.29122	8.95383	10.3762	8.00505	7.41387	8.81444	8.05155	-1.0117	0.985976
mz_1048.7223	7.03866	8.07869	7.60713	6.80927	6.47931	11.1164	9.35743	8.97395	9.37815	9.64661	7.26565	-1.61768	0.985976
mz_1241.0264	8.25668	8.3197	7.40125	6.58805	7.63874	8.78402	8.58711	7.56536	8.53781	6.38931	7.96526	-1.0208	0.985976
mz_0488.2419	13.957	12.8659	14.2905	12.5765	13.9993	11.8933	13.5676	13.7959	14.4222	13.178	14.2018	1.02703	0.985976
mz_0859.5728	10.9149	9.33898	11.6198	10.6114	10.7714	11.2191	9.63447	11.281	11.074	10.5408	11.2797	0.947446	0.985976
mz_2860.8238	13.5162	13.6881	13.084	14.1337	14.063	11.6483	12.6216	13.7533	13.4102	13.3357	13.4947	0.946215	0.985976
mz_1702.8029	11.7826	11.6024	12.4777	12.1011	12.1753	10.3584	11.5793	12.1972	11.8669	11.7793	11.711	0.831332	0.985976
mz_1958.4873	8.25876	5.96605	9.38987	7.27394	9.04906	8.32507	7.54054	8.5574	8.06891	9.13807	7.87539	1.17421	0.985976
mz_1427.0310	8.58796	9.37559	5.4603	8.54088	8.52033	9.26468	9.2927	8.14506	8.20271	9.03657	7.66071	-1.29167	0.985976
mz_0492.2368	8.21385	6.08796	10.4036	11.0193	8.94435	9.53809	9.27023	9.74824	9.60842	10.1333	10.3438	1.50309	0.985976
mz_1603.4678	8.01983	7.74837	8.09188	8.20496	9.77959	7.70447	7.59883	9.02275	8.64067	8.04496	9.8336	1.02089	0.985976
mz_0721.3206	9.28572	10.0491	9.94546	10.0364	10.1195	8.17097	7.85007	9.25099	8.81347	10.4843	10.4378	1.10668	0.985976
mz_0241.2173	9.13751	9.50715	7.35154	8.02613	8.17156	9.79296	9.8104	9.99551	8.85066	9.34756	7.22274	-1.1906	0.985976
mz_0816.5468	8.58	10.6378	8.43646	10.0371	8.8162	10.2316	9.28579	8.03423	10.0971	9.32978	8.29435	-1.09857	0.985976
mz_2187.4728	7.33425	6.51559	8.05697	7.04115	8.03526	6.49539	7.12978	7.76605	8.07023	6.98793	7.23323	0.852043	0.985976
mz_1448.9551	12.4613	12.4439	12.7886	12.4242	10.9409	9.21797	12.0228	12.8401	13.3759	13.0508	12.7864	1.35528	0.985976
mz_1621.7608	6.14202	1.39997	5.43135	7.60609	6.21272	4.92186	6.69054	5.32473	5.21696	6.62226	6.16293	1.75243	0.985976
mz_1044.6594	7.10939	6.97847	7.45966	7.52994	8.31406	5.78655	7.28739	8.80304	8.02022	7.25724	7.07719	1.01221	0.985976
mz_0857.5913	10.3211	11.79	11.6242	9.25188	11.186	11.5544	11.6979	10.6052	11.1452	10.9064	10.4816	-0.990553	0.985976
mz_1000.0406	10.296	8.17207	9.2508	12.3954	10.2882	10.3247	9.12621	9.56294	10.5878	11.3111	10.4837	1.31435	0.985976
mz_1137.8549	8.2246	5.08066	8.65339	8.35408	8.86421	7.93689	7.70927	7.35714	9.00755	8.22463	6.92703	1.29264	0.985976
mz_1439.0413	10.33	9.48329	8.91924	9.69327	10.3511	9.42882	8.1954	10.7444	10.0806	9.5588	10.4473	0.979733	0.985976
mz_2823.0554	9.73513	8.36109	9.49439	10.7178	9.00066	9.54108	9.0252	10.5149	9.47282	10.2019	10.3284	0.957461	0.985976
mz_0615.4959	12.0054	10.3277	10.9975	11.8923	11.4111	10.9119	10.8396	11.0342	11.1354	12.5754	11.6444	0.893891	0.985976
mz_1111.7431	7.56875	9.1714	8.87721	7.48938	8.08623	9.67163	9.20473	8.16996	9.21727	9.31177	8.1965	-0.984623	0.985976
mz_2144.4509	6.73456	8.40725	7.60009	6.85763	6.9421	8.27024	7.4502	7.87793	7.80231	6.5713	5.69016	-1.03305	0.985976
mz_2624.2109	8.99927	8.06471	9.23304	8.67106	8.76665	7.8756	7.90617	8.24021	9.21824	8.6188	8.20169	0.79479	0.985976
mz_1050.8706	11.3582	12.1162	11.1989	11.1106	11.187	11.8875	11.4661	10.3944	11.5093	10.8747	10.1686	-0.848036	0.985976
mz_1104.9176	6.75249	8.25925	5.09374	9.09935	8.24849	7.33294	9.13331	6.33635	5.47348	5.02221	6.61452	-1.66175	0.985976
mz_0450.2262	8.91997	9.2638	8.90935	9.99438	8.75079	7.5325	8.15769	9.16214	8.96931	9.56385	9.92597	0.956472	0.985976
mz_1920.0491	10.8497	9.502	10.273	8.20603	10.3867	8.66428	9.11821	10.1731	10.2697	10.4367	11.1485	1.12311	0.985976
mz_1160.9400	8.01201	5.68257	7.39626	8.63875	8.17458	6.50583	7.82577	7.21821	7.09728	8.05068	7.1939	1.05132	0.985976
mz_0827.3601	9.19218	9.27046	8.78568	8.14826	8.19148	12.4563	8.6634	8.8841	9.08205	8.39256	9.51057	-1.35671	0.985976
mz_1992.4646	10.1556	8.86036	8.82331	8.35454	9.49651	9.07117	5.58801	9.6277	9.65204	8.84306	8.71192	1.36823	0.985976
mz_0828.3673	10.7258	10.4225	10.3401	10.7656	10.4387	8.61482	8.91244	10.4276	9.23092	10.5164	9.96488	0.98466	0.985976
mz_0841.6199	9.21438	12.9294	11.0262	11.6563	11.7852	13.769	12.2501	13.2472	11.8104	11.8536	12.2409	-1.37856	0.985976
mz_1139.7286	8.74646	8.12058	8.92468	8.47641	6.87742	5.7333	7.99329	8.8512	8.56482	8.67904	8.5362	1.17464	0.985976
mz_1153.6927	6.95169	6.04489	7.29148	7.27439	7.02131	6.17373	3.80998	6.35062	4.23213	7.80786	7.6806	1.48339	0.985976
mz_1154.8500	8.66127	8.7719	8.98479	8.8733	7.11388	5.99598	5.8742	8.11068	8.12628	9.12339	6.97401	1.36526	0.985976
mz_1764.8027	6.26758	5.20122	4.28852	7.16453	5.63243	10.1735	9.84915	6.36959	7.75811	5.62856	8.04498	-2.01366	0.985976
mz_1844.9017	5.47618	6.51674	8.10019	6.43189	7.07413	11.7154	7.20002	6.1044	6.41948	6.97178	6.87931	-1.79521	0.985976
mz_0753.4253	10.4939	7.55131	7.93027	6.95359	10.5475	6.04318	9.19482	9.28146	8.98577	10.4798	9.40302	1.66297	0.985976
mz_0901.6562	7.34199	7.99531	7.30079	7.52579	6.98599	8.11597	7.9407	5.61072	7.6514	5.88117	7.54591	-1.03686	0.985976
mz_1666.6932	5.17967	8.57541	6.80811	7.68809	6.99612	8.62285	8.35723	5.78818	7.95049	8.84859	7.92182	-1.37086	0.985976
mz_2186.5816	9.48277	8.47434	8.58006	8.4908	8.59801	6.56494	7.95337	8.10925	8.69631	8.52011	8.38047	0.943004	0.985976
mz_1430.9247	7.38403	8.26866	7.06794	6.69327	6.61276	8.18918	7.48113	7.90262	5.91636	6.22847	7.88622	-1.0182	0.985976
mz_1716.5117	5.62727	5.61195	11.1244	11.6676	7.60204	5.2386	10.9857	12.5092	10.9135	10.5056	11.6798	2.9249	0.985976
mz_0783.4875	7.77398	8.12934	8.80434	7.37341	8.21475	9.65953	8.94231	8.7158	7.93816	6.96939	7.22342	-1.03374	0.985976
mz_1555.8326	7.05048	7.90352	6.71598	8.02054	8.56377	8.38366	8.60508	7.83419	6.82227	6.50402	6.52888	-1.0424	0.985976
mz_1521.0589	4.82542	9.21346	8.33963	7.58994	8.14125	9.10903	7.56378	6.8507	7.16776	6.35221	8.27679	-1.4358	0.985976
mz_0971.6359	8.47373	7.79499	8.52434	8.42498	8.38734	8.18902	7.59345	9.06475	8.28271	9.17012	8.75262	0.775921	0.985976
mz_1308.7357	12.9026	12.2416	12.1577	11.8543	10.696	12.658	13.7321	12.5841	11.229	10.6168	11.8681	-1.13866	0.985976
mz_1262.0107	7.79818	5.01455	7.7675	6.24883	5.83035	4.81136	7.45294	7.14934	7.14405	7.22058	6.74646	1.22855	0.985976
mz_2797.5515	6.95821	5.47016	5.50086	6.60624	7.47064	4.99473	7.09675	8.13723	7.79737	7.23681	6.71198	1.19854	0.985976
mz_2977.4753	7.27526	7.00532	8.67919	8.33323	7.93987	6.39028	8.13888	8.36745	8.34845	8.08498	7.83083	0.929247	0.985976
mz_0776.6164	12.2796	11.39	12.2236	12.597	12.574	12.0399	11.1957	13.6942	11.4572	13.4816	12.1459	1.01478	0.985976
mz_1268.7474	7.24859	8.63753	7.81741	8.39425	7.37667	8.74494	8.24723	7.48775	8.34364	5.70279	7.35947	-1.07691	0.985976
mz_1136.6535	7.56505	11.2072	11.7389	9.07172	9.9233	11.1296	10.1351	10.2021	9.15257	7.33015	8.98336	-1.57807	0.985976
mz_0591.4748	8.9189	11.239	11.0381	7.30925	9.10803	11.3749	10.1846	10.0229	9.39851	10.2369	10.5009	-1.36616	0.985976
mz_0783.5393	9.05509	9.60706	9.48818	8.733	9.55067	9.9992	9.9204	9.36596	8.14544	9.13881	7.86675	-0.924231	0.985976
mz_1119.9349	9.73746	9.02679	10.1583	7.84603	9.13914	7.54325	8.38273	9.67419	8.80946	9.89222	10.0239	1.09249	0.985976
mz_1884.5821	7.44795	7.52798	7.21259	7.55314	8.11397	8.29639	9.96121	6.53534	8.03669	7.85262	7.48884	-1.06505	0.985976
mz_1015.6370	7.66645	9.58892	7.7472	8.16194	6.67772	8.61188	8.5528	8.33796	8.36014	7.34936	8.93686	-1.01317	0.985976
mz_1259.9281	6.46223	4.73814	8.24216	7.90706	7.81505	6.48978	7.49266	8.31264	6.11469	7.3169	7.98985	1.27988	0.985976
mz_2343.4482	7.18981	7.73701	5.90388	7.87368	5.32713	7.46366	7.77041	6.47528	7.49967	6.27693	5.01009	-1.21247	0.985976
mz_1193.5996	7.47397	8.31133	7.97068	4.32474	6.98661	11.636	6.44629	7.79387	7.85484	5.5189	6.61206	-1.98091	0.985976
mz_1490.0079	8.03174	7.87897	7.33237	8.94951	7.57897	6.07869	7.1305	7.52309	8.08382	9.1356	7.98043	1.04755	0.985976
mz_0873.6191	8.16352	9.06957	9.13369	6.48157	8.85641	10.1462	9.33612	8.22934	9.38754	8.53771	8.21708	-1.14144	0.985976
mz_0693.4813	11.0026	10.3651	11.6019	10.4941	11.556	9.70007	10.2215	11.4851	10.1437	10.3654	11.4601	0.91807	0.985976
mz_1998.2933	6.14934	7.52556	6.06413	6.52936	8.26197	8.09949	7.3519	6.84426	6.47359	6.63789	6.48636	-0.978123	0.985976
mz_1059.7012	7.16664	8.30531	7.46499	9.16824	7.40495	8.65268	9.07202	8.00932	8.04438	6.84154	7.2665	-1.00585	0.985976
mz_0813.5920	10.2142	10.0189	8.77244	5.79274	6.07162	10.0866	9.49707	8.7645	8.81174	8.29408	9.10873	-1.63879	0.985976
mz_1088.6966	7.49901	6.69614	7.6587	6.91796	7.16121	8.48961	10.2801	7.66571	6.26635	7.15681	7.60843	-1.24685	0.985976
mz_1586.1962	6.21903	7.43905	5.33869	4.55677	6.08597	6.92966	6.9842	7.51547	7.00405	5.18906	5.60625	-1.17823	0.985976
mz_1728.5117	7.65543	6.84158	10.3088	12.289	7.9815	5.60594	12.0181	13.0252	12.4364	11.9592	11.6446	2.75732	0.985976
mz_1968.8308	10.6562	13.1953	10.3873	10.8588	13.1192	13.9679	10.3977	11.1636	11.4506	10.3463	10.0266	-1.51922	0.985976
mz_0743.5432	7.59274	9.24056	8.79686	6.97842	8.51519	9.29324	9.72705	8.95068	8.87058	9.12614	8.47612	-1.00694	0.985976
mz_1600.7827	6.19667	5.94327	6.49172	3.94928	6.2323	12.3822	6.97789	7.14339	6.3612	7.28794	6.53014	-2.16039	0.985976
mz_2160.4552	8.63465	9.60768	11.5746	8.11304	10.3281	10.6351	11.4059	8.82762	8.64578	8.6524	8.11862	-1.43771	0.985976
mz_1642.2610	5.83644	7.81682	6.34981	7.10811	7.18516	8.37374	8.35681	6.57634	8.33377	7.38832	8.05548	-1.07828	0.985976
mz_0629.4653	12.0419	6.46252	10.3634	8.62537	11.734	10.2429	10.8123	11.0267	11.4741	12.6942	10.3322	1.8639	0.985976
mz_1650.1066	13.6971	13.8848	12.7448	12.6747	13.306	14.9572	13.7835	13.8085	13.8488	13.1425	13.3934	-0.881503	0.985976
mz_1237.8887	6.57516	6.66115	6.71079	7.54216	5.28159	5.99249	4.73201	6.64372	8.15904	8.307	7.37685	1.27932	0.985976
mz_2208.8132	6.40121	6.92095	7.47687	6.11678	6.43816	8.05522	8.01043	7.48309	7.07132	5.61595	6.75425	-0.992496	0.985976
mz_0401.2898	8.71361	8.05546	8.96469	8.86588	8.0041	8.39898	7.65424	8.51974	9.14599	9.34505	9.7292	0.8748	0.985976
mz_1769.1849	7.93915	8.71186	10.1156	10.0372	9.76851	8.80281	7.99413	9.02638	9.83039	9.40135	10.0109	1.01325	0.985976
mz_1295.6160	11.0642	11.1718	10.5218	11.3159	11.702	7.94051	10.4286	11.3965	10.3267	10.6827	11.4441	1.20978	0.985976
mz_1008.6993	12.917	10.8374	12.236	12.2585	12.261	11.6159	11.9041	11.1052	12.3529	13.5966	13.713	1.10257	0.985976
mz_0593.4423	17.0875	18.0433	17.3192	17.3426	16.3442	17.603	17.269	16.3719	13.9936	12.9601	15.9608	-1.71591	0.985976
mz_0953.3918	8.39465	7.60937	6.23369	5.13959	6.83778	7.8167	8.12079	4.92005	7.08188	7.47364	6.07338	-1.32962	0.985976
mz_1042.9383	7.56554	7.73449	6.9231	6.21234	7.7078	8.41402	7.69779	6.62026	6.79816	7.776	6.76212	-0.903102	0.985976
mz_0829.4414	9.0534	7.0377	7.06518	10.1155	9.71633	10.3226	5.63633	9.74702	9.70818	10.0872	9.53926	1.71346	0.985976
mz_1089.9196	9.70267	8.28357	8.56417	8.90023	9.76341	8.19533	8.96818	9.49021	9.34397	9.55104	9.12671	0.822943	0.985976
mz_0897.5581	8.95282	7.95737	9.01226	9.99991	7.75755	8.48419	6.41709	7.61433	8.41013	10.5412	9.21698	1.3186	0.985976
mz_1771.1641	11.2404	10.2499	9.6038	10.34	11.2222	9.05274	9.99395	10.6643	10.6546	11.1871	10.6297	0.927238	0.985976
mz_1058.7513	8.92979	8.26876	8.73859	8.68746	8.57013	5.46661	8.49021	8.86283	8.67977	8.94456	7.46381	1.20109	0.985976
mz_0821.6742	8.83362	8.87669	9.77768	9.29574	8.52799	8.10457	8.22444	9.21842	9.83149	9.82384	8.85112	0.868087	0.985976
mz_2972.0488	11.6688	10.2808	11.2187	11.0577	10.2115	10.0492	10.8897	11.7535	11.7691	11.1128	11.4656	0.875622	0.985976
mz_0271.1516	10.654	12.8588	10.6694	14.2051	12.1879	10.1707	8.85951	11.8254	13.7562	12.6325	13.7978	1.83638	0.985976
mz_0950.5635	11.0758	8.80963	10.3369	9.23376	10.0789	9.82343	9.77478	10.5273	10.4537	10.5895	10.7682	0.913725	0.985976
mz_1274.1951	8.63344	7.50775	9.34459	8.25483	7.97952	6.11371	7.02435	6.78042	7.13605	7.3864	8.74043	1.15002	0.985976
mz_2564.2436	11.0127	11.3829	10.8919	11.6156	12.25	10.7034	10.8428	12.5459	12.1406	12.4951	12.6912	0.979004	0.985976
mz_1181.7755	10.495	11.2137	11.4317	10.8559	11.3698	11.2201	13.2446	11.1139	9.77238	11.1643	8.83567	-1.26298	0.985976
mz_0879.8022	6.67806	8.09229	7.7502	8.56766	7.11833	8.69733	8.72518	7.94415	8.29182	6.99694	6.69851	-0.999225	0.985976
mz_1792.8811	6.99569	6.86745	6.92833	6.35093	6.64688	11.5772	8.29428	8.59922	8.97743	6.82994	4.82017	-1.8944	0.985976
mz_2378.1834	12.2391	12.1706	12.7234	13.1005	12.9869	9.67508	13.0886	13.3554	13.081	12.2064	13.1538	1.21107	0.985976
mz_1682.2197	8.07818	10.144	8.18018	9.47772	6.64258	10.1454	7.67527	8.316	5.55938	8.6374	7.22689	-1.55676	0.985976
mz_1505.1507	7.62996	4.79228	7.96774	7.03457	8.39174	8.00336	6.68602	8.53648	6.15331	8.46514	9.70637	1.49178	0.985976
mz_1141.9345	12.812	9.89213	10.8243	11.8355	12.3667	11.7515	11.4256	11.8388	13.5975	12.9043	11.6003	1.19934	0.985976
mz_1021.7712	14.5979	14.0457	13.0221	13.9798	12.3341	15.1843	14.477	12.4709	14.2561	13.9445	13.137	-1.10117	0.985976
mz_2737.6759	9.07909	7.65928	8.78874	7.88721	7.65542	8.36155	5.53385	8.19243	8.44322	8.68454	7.81574	1.1334	0.985976
mz_0943.7263	9.96078	9.50059	10.3504	11.5826	10.7459	10.9422	9.46884	11.1442	11.3556	11.6862	10.8889	0.993787	0.985976
mz_2997.9916	6.82886	8.59819	7.00848	8.18204	7.49817	8.68009	7.92858	7.01735	7.55426	8.0878	8.0054	-0.879493	0.985976
mz_1817.9015	7.06261	7.63396	4.50961	5.63368	6.67727	14.7643	7.52459	8.12134	10.7756	6.23676	7.71921	-2.88227	0.985976
mz_1107.7024	9.21549	9.0553	8.83209	8.39359	8.31045	10.1283	9.61204	7.83166	6.95479	9.0807	9.48596	-1.08545	0.985976
mz_0731.5181	13.0377	16.3068	12.6496	12.9558	14.9559	15.1015	12.5371	12.6393	12.8755	13.6843	13.0938	-1.412	0.985976
mz_1331.7498	7.32293	5.13605	7.62399	8.43854	7.34794	6.64993	8.1064	8.44434	6.81566	8.07375	8.5413	1.19526	0.985976
mz_0414.1524	6.01905	12.1312	12.1161	9.57973	12.356	12.366	13.0198	10.2757	9.21729	12.0205	11.188	-2.15914	0.985976
mz_0983.5733	12.1635	6.24806	8.33388	6.81097	8.63871	6.82618	7.74367	9.64486	7.06881	7.71768	10.8238	1.96098	0.985976
mz_0693.3339	7.57276	6.13299	10.9896	10.3507	10.8658	9.41646	8.92315	8.54493	8.8881	11.2753	10.7037	1.74132	0.985976
mz_0699.1308	8.90061	8.65649	9.9577	9.47244	8.85434	8.80869	8.27532	9.43748	9.75404	9.59436	9.04645	0.797009	0.985976
mz_1452.2663	10.472	9.47704	8.33268	11.0822	8.62282	7.37019	6.76829	8.83039	8.7117	8.68431	9.28806	1.38118	0.985976
mz_1738.1214	8.3744	7.51035	6.77718	8.47172	8.76425	7.30319	6.04642	8.53583	8.73191	6.94551	7.8229	1.09964	0.985976
mz_1768.1636	9.0157	9.83336	7.88037	8.55483	8.36641	9.32205	9.39348	8.60281	8.53795	9.75048	8.45612	-0.870715	0.985976
mz_1140.9270	12.9265	12.056	11.9089	12.3205	12.7385	12.0386	12.0044	12.9806	13.5951	13.354	13.5237	0.885445	0.985976
mz_1011.8715	8.18775	9.27137	8.38454	9.60212	8.30355	9.17801	10.6094	7.43197	10.0334	7.74752	8.50851	-1.16133	0.985976
mz_0475.1939	10.6454	10.1184	10.3699	9.24145	11.0732	11.471	11.4764	6.49435	8.84303	9.89862	8.80481	-1.60057	0.985976
mz_3112.1478	7.93728	7.27666	7.54457	8.41653	7.54531	7.00488	7.39599	8.11836	8.81365	7.58361	8.5115	0.833008	0.985976
mz_2289.6059	8.87722	9.63628	9.10634	9.84374	8.50707	10.7581	9.94913	8.24188	8.67519	10.2307	9.48999	-0.992992	0.985976
mz_1325.8867	8.52219	9.44813	9.73936	6.5202	9.10336	11.3057	8.99163	6.41238	9.38955	9.31082	5.27318	-1.88126	0.985976
mz_0690.4317	9.60309	7.28362	8.13487	8.61977	8.68687	7.41102	8.34618	9.08303	7.38695	9.68402	8.55118	1.03845	0.985976
mz_1419.0197	18.5812	19.0298	18.6753	19.1353	19.1886	17.7193	18.0368	19.4375	19.4136	18.968	19.2972	0.825113	0.985976
mz_1050.7380	11.9228	13.2369	11.6724	11.885	13.3313	14.1824	11.9599	9.64456	12.7189	11.8026	9.57697	-1.55707	0.985976
mz_1646.8232	7.25976	7.03803	5.73568	7.31705	5.45721	7.61616	7.5105	6.81232	5.2705	7.00474	5.29972	-1.11861	0.985976
mz_1476.0855	10.527	10.6693	10.4993	10.7259	9.87714	10.7511	11.1311	9.07995	9.14901	10.1368	8.62181	-1.02336	0.985976
mz_0820.6097	8.26504	8.95812	8.2051	7.4833	7.51525	9.32129	8.60944	9.1149	7.33848	8.21493	8.34379	-0.902851	0.985976
mz_0472.2306	6.31191	8.10659	6.68794	7.91306	5.3841	7.2648	7.79111	7.44403	4.66161	7.32106	5.66814	-1.29685	0.985976
mz_0657.4966	11.297	12.0645	10.9837	11.5664	11.1063	12.7865	12.9875	11.7194	11.1773	13.2965	11.667	-1.01112	0.985976
mz_1109.7205	9.63102	7.591	10.872	10.7148	8.60692	8.13532	9.29118	8.78022	9.41431	9.11986	8.86744	1.16166	0.985976
mz_0459.3469	10.4342	10.5979	10.4224	10.2683	11.1448	12.9574	11.2738	10.3179	10.9389	10.779	10.7984	-0.971722	0.985976
mz_0983.5995	13.6357	12.912	12.213	12.3903	12.1636	12.3319	7.2542	12.2535	13.3778	13.3459	12.0458	1.84551	0.985976
mz_0482.3241	16.8234	16.5993	19.6032	16.7487	16.5653	19.0869	19.5228	16.1107	17.0179	15.8736	16.0809	-1.55003	0.985976
mz_0944.6339	10.8474	7.76587	10.0329	9.34149	9.45737	9.97421	8.98992	9.81772	9.72606	10.6164	9.63688	1.02452	0.985976
mz_2946.0331	7.93459	6.7249	6.53252	7.52959	7.14952	4.54086	7.36615	7.29074	7.96387	7.24493	6.9791	1.11747	0.985976
mz_0981.6307	10.0407	8.32021	9.84301	9.75771	9.3067	9.51344	9.04494	10.0737	9.44327	9.79897	9.71167	0.787435	0.985976
mz_0663.6051	7.94931	9.28813	8.15346	6.49491	8.71623	8.79421	8.26233	5.89292	7.78953	7.71265	8.24002	-1.16293	0.985976
mz_0583.4826	9.2042	7.34519	8.81415	9.64719	9.16857	9.10272	8.60081	9.35431	8.79859	10.0112	9.08604	0.91096	0.985976
mz_1293.5886	8.14202	8.47891	7.41751	6.81247	8.48876	9.51425	8.77507	7.52716	7.90493	6.34756	9.37435	-1.1709	0.985976
mz_2302.5182	11.4823	11.9636	13.4443	11.1122	10.5073	11.2169	13.6731	9.58981	10.435	9.60801	8.8904	-1.65089	0.985976
mz_1804.0687	9.53151	9.96167	9.34187	9.79982	8.35277	9.70381	10.1096	8.65253	8.33834	9.53759	8.79517	-0.881332	0.985976
mz_0871.6910	9.45901	7.07738	8.87836	9.5009	7.76102	7.28563	8.28179	9.28003	8.72124	7.50514	7.8931	1.07659	0.985976
mz_0709.5741	8.58799	8.67315	6.18938	8.29158	7.73793	4.39188	6.63898	9.43099	8.99383	10.502	7.31438	1.81301	0.985976
mz_2307.7698	10.2843	9.4734	9.73481	10.2334	9.9154	8.37445	8.97565	9.92164	9.2481	8.94366	10.2001	0.869001	0.985976
mz_1519.8100	12.3303	12.9656	12.6377	12.2773	12.3884	12.6347	13.4605	12.3276	12.3142	11.8375	10.6918	-0.91967	0.985976
mz_0917.7005	8.50434	6.76188	8.79142	7.55692	7.17587	7.63464	5.50009	7.11797	8.08359	7.57598	6.94296	1.08643	0.985976
mz_0783.5957	7.43283	9.20014	7.73311	7.71139	7.15851	9.31425	8.52091	9.18723	9.21802	7.37905	7.91675	-1.04466	0.985976
mz_1425.9795	8.59736	9.86831	8.18403	8.88756	7.45853	8.96955	8.65649	4.55311	7.93437	8.3077	7.3803	-1.50192	0.985976
mz_2699.6239	8.08182	7.4649	6.59927	5.34602	4.41296	7.63523	8.24674	6.29487	7.93678	6.09245	6.56267	-1.36644	0.985976
mz_1652.2150	6.9402	7.22675	7.97611	7.27349	6.89281	7.34233	5.77956	8.33649	8.56398	8.07671	9.07017	1.10836	0.985976
mz_1133.6160	15.4867	16.9671	18.3319	15.7506	16.183	17.3949	18.2177	16.6866	16.1189	15.8043	16.7174	-1.14164	0.985976
mz_1405.8136	6.72817	8.3358	6.87956	7.10621	5.635	11.5647	6.97476	8.4396	9.47386	6.73402	5.98304	-1.83599	0.985976
mz_0595.4544	7.53942	8.31652	9.43361	8.43361	7.86531	9.67294	10.4861	9.04173	8.92633	8.27693	7.04085	-1.17213	0.985976
mz_1366.9520	8.46255	8.66441	7.0736	8.03716	8.2459	9.10189	9.00312	8.7489	8.12975	8.13495	7.90541	-0.830867	0.985976
mz_0701.4752	7.03737	6.65374	8.12568	8.80532	9.44194	7.69284	6.19341	7.10689	7.13055	8.20924	8.04358	1.14091	0.985976
mz_1594.0580	7.17986	4.8355	9.96827	5.26975	8.30945	7.52451	7.30116	9.46427	9.6097	10.4797	7.72781	1.94738	0.985976
mz_2613.7268	7.6479	7.3528	8.81369	9.27426	8.47311	6.63602	7.33539	8.52979	7.56886	8.96123	6.54355	1.11848	0.985976
mz_0573.3034	14.4524	14.4305	19.2901	14.1145	14.0209	18.0382	18.9399	14.6136	14.9991	13.1529	14.3397	-2.26327	0.985976
mz_2186.8682	6.31244	8.5059	7.11066	5.76886	7.38489	7.02751	8.84878	5.57497	7.93365	7.52461	7.73707	-1.209	0.985976
mz_1543.9458	6.37118	5.59412	5.77604	7.32397	4.96175	7.67357	8.09061	6.36352	4.00915	5.17291	6.01628	-1.37009	0.985976
mz_1776.5339	12.0261	6.54308	12.0098	12.6076	9.10271	9.20999	10.4903	9.83236	11.0236	7.78364	12.0234	2.05337	0.985976
mz_1165.5319	6.60636	7.40321	7.69753	7.72267	6.13111	7.73676	7.99213	7.13818	6.52888	4.91695	5.58408	-1.16998	0.985976
mz_1517.7944	15.0717	15.0691	15.5439	14.5204	14.1382	15.1799	16.0723	14.2425	14.5788	14.44	13.5943	-0.924177	0.985976
mz_1542.9265	9.29397	9.0224	8.26174	8.29811	7.98008	7.11202	6.65611	8.47255	8.5765	9.23626	8.956	1.03756	0.985976
mz_1425.8926	8.36037	8.10166	7.34165	7.50155	7.54934	8.54648	9.32074	8.08761	7.41899	7.33357	8.58819	-0.883635	0.985976
mz_0766.5475	8.08703	9.10889	9.45839	8.92399	8.9723	10.0822	10.0663	9.77329	8.92856	7.81286	8.22936	-0.979255	0.985976
mz_3030.5018	8.00546	6.29535	7.36194	8.57125	8.38561	7.31462	6.8348	8.3536	7.48021	8.45382	6.25942	1.04399	0.985976
mz_1308.9521	7.6783	3.98533	6.57072	7.63366	7.77433	5.57089	7.65741	5.83457	7.69547	7.90705	6.08323	1.40929	0.985976
mz_0917.5454	9.14607	6.51406	6.60388	9.49919	9.0299	8.66662	8.18607	10.8699	10.0369	9.73998	9.16308	1.47219	0.985976
mz_1437.3911	8.59866	5.96207	9.17859	10.5514	6.00319	8.50696	7.25037	9.8124	9.3642	8.64959	8.43495	1.58433	0.985976
mz_0469.3077	8.13058	7.98624	9.17027	6.13451	3.8991	9.50502	9.28759	6.85663	7.33387	8.06983	7.95644	-1.73238	0.985976
mz_1134.6378	7.96059	10.987	11.314	9.23082	10.0083	11.7102	10.6464	10.4035	11.1533	9.35157	9.07446	-1.30245	0.985976
mz_2140.4255	10.9027	10.6176	10.9572	10.1384	10.4751	9.98342	9.11573	11.1526	10.7629	11.0349	10.5448	0.840487	0.985976
mz_1458.0533	8.05981	7.29352	7.18806	8.38962	7.88374	6.50972	5.80465	8.8024	5.8857	7.76643	7.46353	1.14395	0.985976
mz_2195.3746	9.06862	8.08566	8.91299	9.00501	7.69572	6.07707	7.5416	8.14653	8.16938	6.92933	8.99766	1.13087	0.985976
mz_1424.0460	7.5015	8.90291	7.94031	7.44366	6.52703	8.8807	8.69668	8.65212	8.73786	8.22719	7.88372	-0.96259	0.985976
mz_1376.1904	7.57029	7.64294	6.93109	8.42044	9.06158	4.94253	8.82603	9.65939	10.3178	9.60488	8.54059	1.62609	0.985976
mz_0986.6285	12.3623	11.9182	12.2415	10.8295	11.2507	9.152	10.881	11.6716	12.1521	11.7651	11.707	1.0971	0.985976
mz_2971.5022	8.0756	5.73653	8.41512	7.60147	8.18228	8.3059	7.2194	8.62455	8.19061	7.64031	7.95667	0.998547	0.985976
mz_2133.8697	10.8306	11.4273	10.9644	11.0584	11.3406	9.06299	9.45342	10.7376	11.3146	10.3689	11.0802	0.980685	0.985976
mz_2155.5405	9.43921	8.23487	9.30347	7.56534	7.74786	8.27539	6.7453	9.29723	9.1555	9.24206	8.84499	1.0726	0.985976
mz_0908.6234	6.21569	6.29448	5.62946	7.11895	8.15278	8.54423	8.56644	7.62427	4.86627	5.60921	5.59881	-1.44979	0.985976
mz_0757.5490	12.3139	13.6384	13.0953	11.8711	11.8468	14.017	12.4137	12.1482	11.9141	13.2757	12.6957	-0.961242	0.985976
mz_1901.2506	7.07936	5.48838	8.25432	7.64921	7.88204	6.95979	7.43496	6.86103	7.56548	8.18274	7.32693	0.972426	0.985976
mz_1953.7480	9.85832	4.97798	10.4746	11.6705	7.1816	7.1492	11.0373	11.1479	10.0282	8.19708	11.3672	2.26917	0.985976
mz_0653.3729	9.76965	10.4505	12.4633	9.88717	8.80964	11.6443	12.9898	8.09118	8.33262	12.0042	9.91074	-1.78632	0.985976
mz_0691.3183	9.84771	10.7891	6.25431	9.36496	8.5933	11.8734	8.5682	10.6204	9.58681	7.14001	7.2651	-1.82617	0.985976
mz_0794.4426	7.01492	7.20336	7.51301	6.85833	7.12581	5.30306	5.56947	6.67441	6.86552	6.71393	6.61213	0.89696	0.985976
mz_1626.1630	9.66621	9.69681	9.98149	11.0934	10.2985	11.3803	11.3505	9.11049	8.99801	9.65883	9.03168	-1.07938	0.985976
mz_2464.6955	9.4755	7.60189	8.82208	7.3691	8.73991	8.39738	7.7601	9.60543	9.11089	8.56538	9.98001	1.03875	0.985976
mz_2206.4243	8.41446	7.10426	7.9789	8.26539	7.35393	7.69691	6.51789	7.63592	7.92678	8.38719	7.52674	0.829811	0.985976
mz_1205.8179	7.81033	7.63788	7.05133	8.4489	6.50761	6.27664	5.57592	7.66683	7.13647	7.65077	7.97241	1.03377	0.985976
mz_0972.7028	8.27774	8.21245	8.45868	7.51104	8.46954	10.5546	8.42839	8.40822	7.68872	6.59368	8.10726	-1.12578	0.985976
mz_2131.9142	9.85424	9.65853	10.9384	9.95161	9.66273	7.89761	10.0597	10.3577	10.5859	10.327	9.82768	0.98289	0.985976
mz_0732.3120	8.09127	9.84827	9.77192	10.0653	8.60902	9.36448	10.7059	8.35585	7.96357	8.52738	9.68223	-1.08955	0.985976
mz_2557.1599	8.10527	7.98481	7.94263	7.80346	8.49877	6.57845	6.08388	7.64699	6.80942	7.79796	8.13927	0.960589	0.985976
mz_1264.8914	7.51308	9.21064	8.45428	6.92499	7.73866	8.45419	8.38409	6.95243	7.8835	8.62972	7.96974	-0.924676	0.985976
mz_1488.9810	12.8078	12.4821	13.4773	14.1698	14.5709	10.4721	13.3008	13.2141	12.8398	12.0538	13.5931	1.2558	0.985976
mz_1179.9324	8.77687	9.15784	8.23449	8.3485	7.07208	9.37506	9.06416	8.27256	8.86051	8.7944	8.29033	-0.867803	0.985976
mz_1065.8914	6.04588	7.60584	6.25233	7.32226	6.1673	7.89044	9.3528	8.51698	6.76166	5.77867	8.65071	-1.34605	0.985976
mz_2579.2370	7.9987	9.63645	6.2704	9.33587	8.58502	9.21625	9.17423	7.70805	8.46199	9.16045	8.10581	-1.13902	0.985976
mz_0789.6004	17.7341	16.3077	17.2871	17.0168	16.9785	17.3228	16.3732	17.8021	17.1484	18.7168	18.1149	0.931967	0.985976
mz_1695.1923	18.8334	18.5592	18.3786	18.4755	18.2458	17.8273	17.6381	18.7899	19.3467	19.269	19.4437	0.839632	0.985976
mz_1801.1323	9.18616	9.29719	7.96573	9.8556	8.69096	6.01097	8.06167	9.06414	9.07176	8.89448	9.09106	1.18755	0.985976
mz_1479.0197	7.07294	8.04495	6.74423	6.93948	8.15165	8.20341	8.70467	7.04858	8.38825	7.91018	6.86653	-0.927444	0.985976
mz_0690.4715	10.8156	10.7118	10.826	10.2857	7.56793	12.5255	12.5691	11.7055	10.8626	10.546	11.1799	-1.46181	0.985976
mz_2541.7193	10.5532	10.0567	11.1647	11.345	11.1474	8.94572	10.8965	12.3395	10.7923	10.0818	10.6915	1.04812	0.985976
mz_1781.4638	11.7389	6.8273	11.7476	11.3048	8.59589	9.30744	10.9836	9.68089	9.70605	11.3456	12.1433	1.74343	0.985976
mz_0899.5968	8.12449	7.98358	8.36536	8.37803	8.4184	5.95621	7.72295	8.42152	8.53293	8.67955	6.9485	1.01268	0.985976
mz_1812.3148	10.8861	10.535	9.87514	10.6723	10.7905	10.177	9.06735	11.4953	10.6276	11.0099	11.25	0.899383	0.985976
mz_1243.7103	9.25641	8.58139	7.97701	9.4018	8.91879	10.4597	10.7903	4.99561	8.05619	7.72992	9.70703	-1.68846	0.985976
mz_1143.6770	9.18355	8.11006	8.83297	8.31728	8.76139	7.88973	6.27448	7.719	8.77988	9.08759	7.22871	1.06404	0.985976
mz_2414.2171	8.26128	6.86038	8.21132	8.27099	7.78834	5.32084	8.35143	7.583	8.48102	7.07593	7.93799	1.10702	0.985976
mz_1255.6739	8.91653	9.0693	8.89396	8.52508	8.75799	10.792	10.8557	10.2258	9.23321	9.72036	9.61192	-1.0034	0.985976
mz_0837.3546	7.99193	6.93468	6.2565	7.5579	8.25165	5.80841	7.33472	8.08733	7.82013	7.36784	8.17346	0.995739	0.985976
mz_1167.7693	18.7053	19.1303	20.6482	19.8445	19.3238	20.0311	21.0307	17.8588	18.1566	16.8706	17.2759	-1.47851	0.985976
mz_1058.0108	10.3442	10.8832	11.0679	11.8309	12.0074	13.7719	12.3528	11.3635	11.5755	10.81	10.5316	-1.1446	0.985976
mz_0767.4691	9.52064	7.16537	8.49299	7.96588	8.84695	7.78712	8.74305	9.35173	9.5596	8.09154	9.24523	0.985809	0.985976
mz_1549.1555	9.6906	9.7524	6.99181	7.22803	8.00836	8.41944	8.40323	5.51566	6.72318	6.34326	8.57077	-1.4744	0.985976
mz_3023.5546	11.1391	9.15439	10.1646	10.4154	10.0837	10.5148	9.62676	10.6925	10.6593	11.3298	10.5153	0.859626	0.985976
mz_0537.3915	7.43343	8.67299	8.27629	3.7298	8.98812	9.35526	9.27445	6.69124	8.90499	8.2333	4.63934	-1.98883	0.985976
mz_0715.5154	15.206	14.5309	14.3128	14.2009	14.021	15.8995	15.0821	14.1134	13.6307	14.1583	14.7062	-0.877189	0.985976
mz_0943.5847	7.55143	9.29965	7.41661	7.71673	8.47846	8.3016	7.89002	6.11857	8.31575	7.06559	6.89938	-1.05177	0.985976
mz_1304.8425	13.5485	14.3098	17.381	14.5501	13.3077	16.9925	16.9192	14.6505	14.6671	14.324	13.2101	-1.61896	0.985976
mz_0731.5490	8.91316	9.85515	9.5203	7.4616	9.1272	9.77829	9.7721	9.17253	8.5551	9.5756	8.69212	-0.924645	0.985976
mz_0612.4235	7.42544	8.20104	8.03579	8.82451	6.40652	8.24215	9.83008	7.16872	6.1878	7.84196	8.51241	-1.20736	0.985976
mz_1084.7306	9.54834	9.54953	9.24706	8.76166	8.4277	10.9482	10.3064	8.61282	9.6718	10.1119	10.0071	-0.969472	0.985976
mz_1913.0251	9.58507	9.92446	10.2017	9.75782	8.89959	7.53409	8.70994	9.42796	9.50016	10.2007	10.2598	1.00626	0.985976
mz_2567.2121	11.8648	9.87736	11.3009	11.9243	11.9136	10.1993	12.1396	11.6933	11.3116	11.4353	12.1171	0.956373	0.985976
mz_1582.1422	10.0246	10.065	9.64724	10.8112	10.5209	8.12912	9.94266	10.95	10.3134	9.83083	10.747	0.976689	0.985976
mz_2952.5086	8.4914	6.21752	6.57335	7.50977	7.88719	7.00471	6.76784	7.91417	7.73191	6.70592	7.94118	0.931003	0.985976
mz_2838.8970	8.18083	7.35861	8.33529	8.26833	7.77901	6.00715	7.58094	6.9557	7.2133	8.31034	8.5096	0.961815	0.985976
mz_1115.8461	8.7347	8.13184	8.67977	7.45108	8.99884	7.84199	6.15954	7.8598	8.17638	8.93781	8.2038	1.00248	0.985976
mz_1459.3966	10.8417	9.87301	11.9846	11.5101	11.9507	9.63595	11.201	10.7656	11.1728	10.1714	11.3687	0.984033	0.985976
mz_2579.1631	8.14332	8.35576	7.85222	8.83451	7.95863	7.39874	5.93998	8.57053	8.49323	7.82117	7.97827	0.974992	0.985976
mz_1402.0252	6.94752	7.28697	5.41388	7.28943	6.45044	7.72172	7.78874	5.44837	7.31709	7.57292	5.12178	-1.15396	0.985976
mz_0347.2921	14.3203	13.6508	13.9909	15.6963	14.8994	13.1825	13.5013	14.6257	15.314	13.5719	13.3697	1.02866	0.985976
mz_0729.5252	9.79692	8.36695	10.3116	9.71638	9.32249	7.61313	8.56836	8.54375	10.6367	8.65595	7.76219	1.16044	0.985976
mz_0787.5807	17.7674	16.8705	17.3766	16.5611	16.8103	15.9511	16.4308	17.3081	18.4057	18.2008	16.6433	0.966709	0.985976
mz_0513.1743	6.27195	7.52768	7.68843	4.31649	7.84517	8.0305	7.70534	5.87684	6.98724	6.8445	6.07858	-1.26586	0.985976
mz_2794.9502	9.07866	10.2675	7.99203	9.77168	9.35329	10.4697	10.6597	9.78634	9.37636	10.487	10.0627	-0.977118	0.985976
mz_1411.4482_1	12.8517	14.2935	12.7167	13.0541	13.6847	14.4332	14.1209	13.5472	14.0913	14.1977	13.3397	-0.847183	0.985976
mz_1422.0044	12.3712	12.6347	12.3455	12.5782	12.2514	10.5768	11.8011	12.6717	12.7806	13.0215	12.4017	0.881876	0.985976
mz_1273.9309	7.2439	8.97874	8.29818	8.70532	7.9096	9.03185	8.34595	8.76523	7.19794	6.9946	7.51913	-0.956275	0.985976
mz_1257.7248	7.67094	8.48772	8.54183	7.07407	5.89401	8.91984	8.80594	8.4903	6.66371	8.96697	5.47789	-1.39037	0.985976
mz_1531.9697	7.06479	8.47885	5.70151	4.84504	6.58521	8.51608	6.36108	8.24795	7.10929	5.59021	6.27596	-1.35784	0.985976
mz_1048.6300	8.51812	7.38696	8.11137	8.13674	8.96001	6.90368	8.4678	9.30769	8.70651	8.34679	7.83639	0.904306	0.985976
mz_1139.9200	6.91038	6.5011	7.23538	7.5571	7.35448	6.26621	6.62173	8.06923	6.1823	7.74448	7.57599	0.865655	0.985976
mz_0889.5787	9.30965	10.3377	9.82167	9.21706	9.78436	10.3594	10.1583	8.83162	9.59633	9.27605	10.192	-0.781558	0.985976
mz_0875.6019	14.0927	14.4197	13.5368	14.5465	13.1893	12.8672	12.7401	14.8268	15.2778	15.4335	14.6975	1.10778	0.985976
mz_1074.7299	10.2518	12.1025	11.0255	10.2235	11.7283	12.636	11.1545	11.2018	11.1737	11.3129	11.4386	-0.919851	0.985976
mz_1593.7823	11.3469	8.11641	10.5317	11.5823	9.98868	11.1104	9.22591	9.66328	11.3651	10.4325	10.5876	1.20301	0.985976
mz_1424.1904	6.05294	8.47729	5.77857	7.71472	8.0578	6.79337	7.3028	5.24921	5.33282	4.81443	6.33939	-1.357	0.985976
mz_1545.0039	8.65326	8.56658	9.4239	10.0215	9.12855	7.94975	8.10624	9.04324	9.49376	8.13186	8.7756	0.876442	0.985976
mz_0824.3229	9.70823	8.90363	8.68079	8.19514	9.04589	6.12073	7.30978	8.02191	7.41918	12.3679	10.2805	1.77023	0.985976
mz_2853.8402	9.6997	7.11831	10.6848	10.0658	9.15701	9.44159	9.18759	9.31214	10.4405	8.30637	10.9555	1.24522	0.985976
mz_0943.5307	8.58028	8.41535	9.5414	9.31215	9.09907	9.51314	6.38224	9.35542	9.27526	8.98336	9.29694	1.07691	0.985976
mz_2618.7186	5.94008	7.42749	6.13321	5.13874	5.39266	7.35084	7.72245	6.99712	7.02723	7.12705	7.60877	-1.07965	0.985976
mz_1139.8447	8.74168	7.62119	8.20449	7.22764	7.80783	7.30145	5.71351	8.41188	6.92265	8.74672	7.48161	1.06435	0.985976
mz_2948.5501	8.75196	8.26593	7.33702	8.80641	7.83404	6.44152	7.4229	7.68569	9.36667	9.04149	8.64079	1.05622	0.985976
mz_1257.6731	7.8325	8.44459	7.11432	8.26109	7.48892	8.05009	8.16915	6.81487	6.76154	6.69191	7.82597	-0.872387	0.985976
mz_1135.7145	11.0003	11.4204	11.905	10.6913	11.2773	11.2924	12.6355	10.1257	10.6867	10.5628	10.7054	-0.91344	0.985976
mz_0916.7212	7.89855	9.39182	9.42783	9.09476	10.0842	10.0591	10.602	9.60864	8.17939	8.81664	6.35157	-1.33492	0.985976
mz_0443.1441	12.9378	13.263	12.2399	13.257	12.8317	13.8362	14.4016	13.2028	12.5891	13.0946	13.7682	-0.843468	0.985976
mz_0923.4337	6.3421	10.6559	7.50115	8.83987	7.30014	13.1153	7.8546	8.34075	12.1913	7.55743	8.53962	-2.21541	0.985976
mz_1355.6899	9.34869	9.55345	9.34852	9.18497	9.91696	8.28278	7.16133	9.73708	9.35555	9.29382	8.39714	0.990322	0.985976
mz_2825.9924	13.9137	13.5778	13.2683	13.8862	12.6194	12.4324	12.3822	14.3699	13.6451	13.9534	13.9194	0.899432	0.985976
mz_1428.0527	7.57147	8.52863	8.59498	6.92207	9.39458	7.39079	5.40955	8.72098	9.02474	8.80702	8.1281	1.28583	0.985976
mz_1994.7726	9.91559	7.15041	11.4315	12.094	5.92007	4.67575	11.4629	12.4287	10.4659	10.6237	10.384	2.64492	0.985976
mz_0591.3844	7.75274	6.48148	7.16544	7.86186	6.73209	6.79739	7.31082	7.71283	9.12888	8.1588	8.11656	0.965422	0.985976
mz_0785.3244	9.34112	10.085	9.77078	8.27751	8.52275	9.22117	9.98883	9.07874	8.24372	9.21815	8.68796	-0.872414	0.985976
mz_1267.8664	10.2747	12.2233	10.0263	12.1101	11.974	13.0188	13.0096	10.1247	12.8073	12.6437	11.7477	-1.28701	0.985976
mz_0828.6324	16.7923	15.8991	16.8989	16.2099	16.0839	16.6303	14.5983	17.1301	15.8823	18.5085	17.4998	1.16648	0.985976
mz_1188.9951	8.20734	9.09606	9.44174	10.6232	8.71477	7.67362	9.32771	10.7149	10.3843	11.344	10.5797	1.30212	0.985976
mz_0676.3515	6.57477	4.02532	8.0316	8.84194	8.21055	5.95485	7.83776	6.92628	6.68403	6.16533	7.77711	1.46214	0.985976
mz_1274.8112	7.24667	6.89572	7.49122	6.71841	6.32619	8.2067	7.47871	7.24832	5.06259	5.22612	5.37137	-1.19068	0.985976
mz_2189.3641	8.82083	7.64266	8.5013	8.75817	7.85763	8.29808	8.17328	9.1073	9.46218	9.42498	9.14317	0.846436	0.985976
mz_0980.2781	7.44297	6.69525	6.00598	7.07632	7.60787	6.22021	6.17059	7.21464	8.39016	7.91341	6.87941	0.95433	0.985976
mz_1033.7019	11.2289	8.6397	13.4314	11.2939	11.1097	12.6931	9.33418	12.4439	9.93469	12.7786	13.3928	1.72942	0.985976
mz_1030.8209	8.19054	8.54492	7.73736	7.5417	7.59782	8.21083	8.55354	8.21936	7.58479	5.63629	6.34019	-1.08042	0.985976
mz_1440.0374	13.2141	13.2643	11.035	10.181	11.761	13.7574	13.5132	11.79	13.1032	14.1449	11.8364	-1.37845	0.985976
mz_2528.6716	10.4692	10.988	10.1	10.6013	9.61417	11.9726	10.1674	10.1446	10.1696	10.0195	10.4006	-0.852819	0.985976
mz_0798.5854	8.86088	7.77606	8.92249	9.01426	7.34212	8.55893	5.6465	9.09438	9.4959	7.70547	8.04365	1.23273	0.985976
mz_1742.1692	8.16959	5.62192	7.39022	8.47128	8.1227	7.75731	6.75741	7.88597	7.02986	6.96812	7.62199	0.995254	0.985976
mz_2457.1717	8.28193	7.73917	7.366	5.0941	6.58229	8.46339	8.53782	5.58771	7.98584	6.76066	7.95344	-1.2953	0.985976
mz_1321.7513	8.92364	7.741	8.95559	8.30412	8.75085	7.36265	9.31183	9.68213	8.89045	10.2254	9.49441	1.01482	0.985976
mz_1653.7871	6.35534	7.62661	6.16372	5.77438	7.08791	8.88148	6.12193	5.9201	6.67812	6.25012	7.38486	-1.09152	0.985976
mz_0910.5862	9.11726	9.14403	9.90791	8.26984	8.93742	11.4649	9.51919	8.89197	7.89264	9.20081	9.43422	-1.0862	0.985976
mz_1302.8083	8.32287	5.26572	8.09046	6.59543	7.36553	7.948	6.68528	7.96945	7.62167	9.29145	7.41064	1.20043	0.985976
mz_0978.9423	14.3551	15.2572	14.1817	14.9257	14.3745	15.2742	15.3622	14.819	14.8185	14.928	14.069	-0.738941	0.985976
mz_0898.8433	13.0907	13.0343	12.4319	12.9869	11.9969	13.0969	13.5863	12.3171	11.2542	11.4233	12.8825	-0.941226	0.985976
mz_0779.5679	12.4283	13.6836	12.5172	13.0454	13.2204	13.2872	13.0607	10.728	12.7712	12.3237	11.1133	-1.07537	0.985976
mz_1841.3735	5.57797	6.29179	7.14442	5.58412	8.42677	4.32793	6.75951	7.61361	7.97898	6.87273	8.73433	1.44854	0.985976
mz_1347.6652	8.35269	6.80668	10.5455	7.96155	9.79493	8.88905	8.56018	9.6189	9.68779	9.33313	8.76814	1.17252	0.985976
mz_0808.4982	11.0712	12.6519	10.1206	12.7456	10.8054	11.9955	12.7614	10.7693	12.4931	11.9598	10.9019	-1.11124	0.985976
mz_0755.5796	8.15668	7.24946	7.77252	8.89486	8.08716	7.8881	7.40605	8.68611	8.21562	8.21855	8.14646	0.757705	0.985976
mz_1030.6472	11.2334	13.4608	11.6001	12.9115	11.1338	12.6196	14.1694	11.5116	12.0253	13.166	13.9314	-1.22749	0.985976
mz_0980.6127	8.85756	8.81156	9.44212	9.69375	9.06699	8.07618	8.36677	9.89339	9.66499	8.10927	9.67908	0.882722	0.985976
mz_2255.5929	9.30735	10.1886	8.95797	9.08715	8.81986	9.68044	10.0694	8.88083	9.59603	9.48166	9.72817	-0.747086	0.985976
mz_1351.1007	6.868	8.10322	6.45017	5.5037	6.54864	7.94234	7.22007	4.74592	7.97623	7.99474	5.68121	-1.28413	0.985976
mz_1683.2498	9.07602	5.8263	9.25292	6.83663	5.46597	6.73455	6.72924	6.87723	8.17214	8.74837	8.46986	1.43237	0.985976
mz_1493.1110	8.27731	8.48773	8.77439	7.24535	9.88104	11.5663	9.1146	9.37646	8.17087	7.85507	7.1941	-1.37606	0.985976
mz_2237.7948	8.41671	8.36341	8.30597	8.25133	7.96136	8.35879	9.57529	7.65821	6.88361	5.60303	7.79433	-1.15651	0.985976
mz_1899.1464	9.20557	8.5279	7.68219	8.25342	8.53333	6.52	7.3114	7.78023	8.06378	9.83474	8.94781	1.08454	0.985976
mz_0978.6335	11.5142	12.5566	11.9279	11.845	11.6667	12.3606	12.8086	12.2397	11.9124	10.6357	12.2597	-0.825063	0.985976
mz_0781.5800	9.35406	8.44161	8.32642	7.39171	8.03818	6.28173	6.4419	8.04398	7.23894	7.98388	9.03712	1.1217	0.985976
mz_0715.3875	6.75877	8.83372	8.48849	6.86271	9.01947	9.00124	9.55888	6.09956	9.04674	7.38687	8.95962	-1.3035	0.985976
mz_1933.0189	7.37182	7.71775	8.83064	8.91043	9.11199	7.76602	7.34171	8.51608	8.51209	7.9072	8.5448	0.854636	0.985976
mz_0777.5440	8.05267	11.6544	8.2468	12.029	8.92806	11.2119	11.8687	10.7653	11.3763	10.0037	10.8915	-1.54166	0.985976
mz_2519.6740	10.873	12.5769	11.278	11.0639	11.6064	12.0909	12.8455	12.2871	12.1816	10.6277	12.5094	-0.951084	0.985976
mz_2942.9232	6.91419	6.2133	7.60621	6.72089	5.79646	6.20932	5.28821	7.01995	7.14422	6.07491	7.19242	0.905047	0.985976
mz_1699.2072	8.42669	10.2557	9.59447	9.68531	9.6329	10.2881	10.0332	9.75679	10.0033	8.97028	8.57565	-0.861669	0.985976
mz_0409.2361	11.8725	12.14	11.3669	10.7199	11.2977	11.8945	11.4898	10.6837	11.356	10.052	10.0839	-0.912336	0.985976
mz_2954.0018	8.45729	8.46248	8.06645	7.96693	9.036	6.25608	7.86968	7.92476	9.12914	8.57812	8.95162	0.984377	0.985976
mz_1159.9872	7.62601	9.50722	9.04387	6.58214	7.25474	9.54322	8.31531	6.61189	8.99856	8.31454	8.82211	-1.21518	0.985976
mz_0483.2728	16.6252	15.995	18.2907	16.7735	16.4361	18.5287	18.4881	14.8396	16.6603	14.5916	14.2062	-1.61773	0.985976
mz_1884.5914	8.1024	7.67967	9.93813	8.73782	6.89594	6.657	8.0529	8.75206	8.17844	8.95683	9.07839	1.11681	0.985976
mz_1255.7255	11.6872	11.1793	12.0806	10.6103	12.3167	12.4733	13.2651	9.90594	11.3037	10.8894	10.4742	-1.1474	0.985976
mz_1586.1352	8.06459	9.17632	9.31461	9.7929	9.44809	6.65167	8.80108	9.88359	9.87684	9.53092	8.70568	1.11746	0.985976
mz_0909.5685	10.0369	8.52008	9.88155	9.86966	9.79923	10.1634	8.59387	10.3458	10.2384	11.4893	9.1769	1.01226	0.985976
mz_1123.5072	15.9896	14.5817	16.4237	16.7207	17.0051	15.2187	16.1742	16.7417	14.6746	16.3474	17.25	1.06923	0.985976
mz_2324.5390	8.94817	9.44292	9.84613	9.5237	8.75836	9.73773	11.6506	9.28472	8.95993	10.02	8.98084	-0.986857	0.985976
mz_1544.9058	10.8043	10.8214	10.7627	10.7523	11.1045	9.52752	10.1888	11.4203	10.8338	10.6014	11.5395	0.79808	0.985976
mz_1448.2631	15.2714	11.1341	12.0821	14.6192	13.9457	12.5094	12.6368	13.8669	12.4875	12.0529	13.2366	1.35184	0.985976
mz_1291.8183	9.26282	9.11955	10.6874	9.44042	8.80317	7.40047	9.47456	9.92974	9.25657	10.2647	9.9302	1.03203	0.985976
mz_1574.2074	8.52166	6.5779	7.3403	7.85055	6.38537	5.09177	6.22561	7.94041	5.30905	6.4302	8.13579	1.27407	0.985976
mz_1473.8561	16.3244	15.857	15.7533	16.1662	16.2507	13.2072	16.0063	16.2604	16.3471	15.3391	16.3637	1.07712	0.985976
mz_1387.6505	6.5502	6.76413	6.10562	7.75907	7.30756	5.35732	4.77642	5.25671	6.84686	6.77892	7.31882	1.10785	0.985976
mz_0493.2045	9.74642	12.4473	8.28337	5.90061	4.85091	8.88078	7.02969	6.15109	7.37206	9.27699	6.31231	-2.21586	0.985976
mz_1158.6184	11.6207	12.8315	14.4985	11.9825	11.6716	13.4631	14.668	13.179	10.9662	11.455	13.0318	-1.35356	0.985976
mz_2555.6951	7.95877	6.59604	8.63685	9.14114	7.72179	7.76422	7.54949	7.46883	8.64341	7.94045	8.05776	0.892876	0.985976
mz_1169.6007	5.39793	7.13385	6.46299	6.69306	5.99354	8.7133	8.18238	7.52592	6.93498	8.67506	6.82429	-1.19637	0.985976
mz_2898.8606	9.5508	9.94215	9.48615	9.57262	9.603	4.44656	9.50695	10.4053	9.36972	10.0667	9.21135	1.69298	0.985976
mz_0511.3030	15.0315	14.5361	17.2028	15.8368	14.0787	16.7159	17.4017	13.8803	14.2941	13.3322	13.3909	-1.587	0.985976
mz_2976.9439	6.361	7.35295	6.89697	7.02482	6.99658	7.69194	7.68035	6.09966	7.10537	7.08325	7.02322	-0.751222	0.985976
mz_1418.0032	14.5355	14.57	14.2734	14.5123	15.0404	12.6377	13.5065	14.4638	13.8476	14.0706	15.0769	0.906174	0.985976
mz_1454.0319	9.7843	10.1319	9.66121	9.76049	10.4839	8.74828	8.08479	10.2559	9.82992	9.85416	9.42305	0.893285	0.985976
mz_1797.6059	10.9909	8.20825	11.2757	12.1453	6.85069	6.38854	12.1705	12.695	13.1577	12.251	11.446	2.42912	0.985976
mz_1864.3563	13.6007	12.6774	13.559	12.6447	9.85295	13.3669	13.4964	11.3865	10.5636	7.44904	8.19017	-2.27443	0.985976
mz_2647.7248	7.2105	6.19992	8.47639	7.70507	7.27376	4.41105	8.10396	6.71575	7.953	6.70692	8.07964	1.27681	0.985976
mz_0917.3918	10.3676	11.7195	8.73529	11.6785	11.8779	14.6164	10.3042	11.8309	11.011	8.52432	8.18735	-1.93675	0.985976
mz_2832.9744	10.5256	10.9263	12.1175	11.0829	12.1587	11.0108	10.8155	12.2636	11.7656	12.1697	12.6956	0.929895	0.985976
mz_1036.7223	10.3645	11.1867	10.6727	11.1292	9.83571	10.4804	11.9785	8.62424	11.2379	8.14612	9.26722	-1.30551	0.985976
mz_1470.9783	14.7621	13.379	14.8764	15.0769	13.8833	13.6498	13.6997	14.2303	13.8722	13.8892	14.4241	0.800626	0.985976
mz_1661.1715	6.15824	8.58094	8.2171	8.41072	7.52945	9.36995	9.18999	8.98924	8.79128	6.14851	8.22378	-1.23842	0.985976
mz_0942.8332	6.21343	10.2425	9.16502	8.78784	8.91732	9.60549	9.64722	9.51829	9.06382	8.48566	9.10841	-1.17428	0.985976
mz_1844.1727	11.2988	10.5203	10.5504	10.7491	11.1831	9.72278	9.79971	11.0421	10.2514	10.5606	10.6201	0.76768	0.985976
mz_1472.8835	8.06033	8.60877	7.10182	7.14613	6.26269	11.1308	7.18608	9.14484	8.66072	5.84663	6.79385	-1.59809	0.985976
mz_2979.5437	11.0366	9.83575	10.3172	9.45741	10.3998	8.41408	10.5398	10.9625	10.6723	10.8056	10.9218	0.975094	0.985976
mz_2248.5746	8.27488	7.82161	8.6262	8.05795	8.06842	7.30207	8.00424	8.47549	8.76707	8.39431	8.93877	0.741079	0.985976
mz_0982.7682	6.87321	6.29287	8.33319	8.03053	7.77532	6.61875	8.25096	8.78384	9.07436	9.66284	7.42021	1.18999	0.985976
mz_2856.8136	15.2621	15.0736	14.5203	15.1985	15.158	12.9677	14.6502	15.1369	15.3251	14.9722	15.4312	0.895052	0.985976
mz_1230.0631	8.2521	9.19492	6.48477	9.86457	9.00878	8.88022	9.51321	7.24112	8.09005	7.83313	6.15937	-1.32939	0.985976
mz_1051.6762	14.2937	14.3744	14.8248	13.9599	14.2426	14.686	15.4197	13.7799	13.5109	13.2756	14.0295	-0.837057	0.985976
mz_1690.1943	6.73824	5.49646	8.12598	8.20687	8.54351	6.52929	7.01484	5.65528	8.66253	6.68242	8.39943	1.27992	0.985976
mz_1009.6656	5.43679	8.06999	6.54379	6.71429	7.53588	7.79097	8.07949	8.10823	5.23402	7.53674	7.4031	-1.16604	0.985976
mz_1078.7414	10.7753	10.6551	11.6824	11.182	11.2454	10.1827	10.7588	11.0705	11.1467	11.4193	11.5019	0.720765	0.985976
mz_1442.9415	7.74748	6.13869	9.01942	7.22082	8.56622	8.07945	7.7451	9.09642	7.67924	8.85063	8.98844	1.07501	0.985976
mz_2147.4779	7.54945	8.81473	8.43564	7.30669	6.9476	8.73311	7.72775	8.24968	6.94893	7.69825	7.13823	-0.890889	0.985976
mz_2320.0070	6.69081	9.28648	8.21854	8.92017	7.16977	7.40379	9.04748	6.20649	7.28552	7.2962	7.70226	-1.14303	0.985976
mz_1203.0084	9.54354	6.65377	8.59558	8.68926	8.99017	8.90699	7.27747	7.64464	8.13185	9.62318	8.29652	1.0766	0.985976
mz_1110.9282	7.1368	6.98378	6.0094	8.4131	7.65443	8.58118	8.88701	8.00515	5.95638	5.94754	5.74097	-1.29268	0.985976
mz_1947.0947	6.78718	8.19418	7.54808	8.10205	7.4641	7.88081	8.45619	6.80287	6.2839	6.42749	8.28224	-0.964819	0.985976
mz_0893.6147	7.11225	8.29635	7.8725	7.68385	8.09488	8.83715	8.46519	8.72789	7.58366	7.30742	7.25853	-0.827772	0.985976
mz_2875.5644	8.13948	8.51834	5.92129	8.26431	7.7202	8.90454	8.9732	7.16435	8.28183	8.22137	8.43202	-1.03059	0.985976
mz_1249.8770	3.42209	8.14312	5.90721	6.95153	7.45157	7.33082	8.99791	5.65316	8.49336	6.83069	7.52946	-1.6274	0.985976
mz_0376.3421	10.5986	10.0487	8.89792	11.3799	9.86772	9.48748	8.94538	10.6173	10.9752	10.6004	12.1411	1.14091	0.985976
mz_2563.2132	8.57644	8.20768	7.44273	8.42035	8.69104	5.62929	7.91511	8.63532	8.41811	7.62532	8.6683	1.05901	0.985976
mz_1354.0241	7.00146	6.69663	6.02531	6.84356	5.3539	5.98198	4.48833	6.92848	7.67889	7.64151	7.41538	1.13875	0.985976
mz_1748.1516	9.4093	8.15191	8.49258	9.05978	10.3026	10.2683	5.96707	9.93922	9.56691	9.13139	10.0453	1.36428	0.985976
mz_0926.5999	8.42165	9.36364	7.37443	6.79437	7.1444	9.12934	7.15251	6.57507	6.53342	8.39965	7.99654	-1.14356	0.985976
mz_1095.6719	7.66755	7.66009	6.97674	6.78258	5.21062	7.59685	7.01194	5.54404	5.09832	7.04083	6.19059	-1.10905	0.985976
mz_0539.4670	16.1277	16.9313	16.9107	16.5204	16.6527	17.3797	16.5477	16.0251	14.631	14.9912	15.6877	-1.00959	0.985976
mz_1336.8914	8.45713	9.91144	9.27162	7.67065	7.74849	8.85582	9.24285	7.74011	9.00874	9.13317	8.17366	-0.936258	0.985976
mz_0731.2298	11.3609	11.3565	10.6061	11.3222	10.0673	11.3448	12.3521	10.9035	10.5771	9.70125	11.5036	-0.929202	0.985976
mz_0548.2994	11.5228	11.8131	15.4748	12.9657	11.1924	14.5332	14.8496	10.8534	11.755	10.9161	10.4144	-1.84515	0.985976
mz_1229.7376	8.48152	8.70321	9.38835	7.33689	8.00238	8.99172	8.85777	8.23109	5.86222	7.09246	6.25187	-1.27005	0.985976
mz_0605.1852	12.556	14.4372	12.2308	11.882	12.5992	14.0994	12.5553	12.3433	13.0551	13.0496	13.8733	-0.998625	0.985976
mz_0438.3214	9.12832	7.08382	7.74675	7.21145	9.23944	5.96484	8.71651	7.67857	8.56965	9.15006	8.87653	1.19504	0.985976
mz_2130.6055	6.66768	8.31073	8.88161	8.23804	7.56528	5.84779	6.80097	8.02486	7.90877	8.73858	9.53955	1.20905	0.985976
mz_2957.5441	10.3048	10.6223	8.17732	10.4655	9.66255	10.8225	10.6215	10.4225	9.58873	9.99074	9.13225	-0.9707	0.985976
mz_1218.8334	5.61879	7.63538	7.30656	8.12575	6.09437	7.35074	8.28918	7.1097	5.96758	6.92566	6.71144	-1.02596	0.985976
mz_1470.9969	9.72403	7.5253	10.3681	9.37832	9.8383	8.70214	10.0927	9.19166	10.4863	9.65405	9.55289	1.00082	0.985976
mz_2345.0465	7.74184	8.44698	6.42293	7.09573	8.005	8.47575	7.79293	7.34483	8.4308	5.44458	6.29212	-1.14132	0.985976
mz_1632.1324	8.76574	7.38488	7.93228	8.71643	8.76679	7.89447	7.21665	7.64619	8.29217	8.08266	8.04278	0.781959	0.985976
mz_1526.7333	6.13766	5.99095	7.04215	7.59688	7.30873	12.3134	7.98119	7.87497	7.13043	5.3732	6.5903	-1.88005	0.985976
mz_1815.7182	8.18495	9.23575	7.36833	8.36192	8.0172	8.86731	7.98516	7.06167	8.55697	7.74649	7.05667	-0.901802	0.985976
mz_1786.0861	13.2762	10.4103	12.391	13.2811	13.5624	12.4208	13.4433	13.8969	12.2172	13.5107	13.8384	1.15525	0.985976
mz_1211.5021	8.40433	8.7913	8.36746	6.57071	6.91566	8.07303	8.92493	8.374	7.64845	7.09265	4.82229	-1.32198	0.985976
mz_2078.8783	9.58169	8.31216	9.6041	8.2862	8.98959	6.45695	8.71633	9.46463	8.32783	9.49165	7.73356	1.10643	0.985976
mz_1720.4865	12.1268	11.5422	12.0043	11.1365	11.1508	10.0601	10.7067	12.2974	11.8665	10.7509	12.2238	0.924922	0.985976
mz_1579.0346	10.0654	11.9625	12.3388	12.1289	13.3186	9.49385	11.7617	13.3103	12.8604	12.1431	14.4276	1.50142	0.985976
mz_1166.7657	19.6903	19.4218	21.163	19.9726	19.5886	20.5275	21.5329	18.334	18.4763	17.0391	17.8715	-1.47713	0.985976
mz_0766.5311	8.11544	10.319	10.2029	10.1153	8.22596	11.0952	11.0091	9.8459	9.51649	11.143	9.99312	-1.16299	0.985976
mz_0949.5049	14.0798	15.1657	13.6852	13.4031	12.1367	14.9949	14.3233	15.2035	12.8073	14.4822	13.9021	-1.11549	0.985976
mz_1119.6003	6.91702	3.72195	6.72246	7.77799	8.08295	7.63523	7.53723	7.89364	7.22533	11.2339	10.2665	1.96683	0.985976
mz_1099.8512	10.456	9.51516	10.9259	10.3945	10.5506	10.6406	9.69608	10.2406	12.5617	11.4373	11.0519	1.00168	0.985976
mz_1677.1078	9.153	7.78313	7.69108	9.09204	8.10213	7.22253	8.14682	8.5483	7.92663	9.22302	9.30944	0.913209	0.985976
mz_2262.8214	8.15015	7.16377	9.51243	9.31666	8.57712	4.98003	8.17541	7.16788	8.13093	6.04396	9.49821	1.5266	0.985976
mz_0874.5569	7.96793	8.30546	7.78637	5.35172	6.83124	7.75809	7.82371	7.75165	5.82449	6.29969	6.98848	-1.11222	0.985976
mz_0695.4857	9.82433	8.06292	12.4794	9.69978	11.3297	12.414	7.26977	9.6923	11.5695	12.7091	11.846	1.89488	0.985976
mz_0816.7929	7.75901	15.3204	9.46175	8.96726	14.5202	14.9208	9.29185	7.46293	9.2447	13.317	11.117	-2.94645	0.985976
mz_0827.3035	16.721	18.3957	13.4277	15.3885	16.716	19.0624	14.966	17.0447	16.7284	14.3301	15.4591	-1.74776	0.985976
mz_1446.0044	11.3647	11.2579	11.4018	11.7438	11.5774	9.76379	11.6607	11.7696	12.3546	12.1504	11.7789	0.873546	0.985976
mz_1355.9834	8.32208	8.29295	7.8782	7.08657	8.09139	8.1469	9.41938	6.68327	8.34549	7.98526	6.22287	-1.04286	0.985976
mz_0997.5893	9.2105	4.99082	7.8685	8.05557	7.23315	7.48307	7.73412	6.733	8.47773	7.92166	8.00883	1.20261	0.985976
mz_1683.2123	8.23894	9.08461	9.19566	9.31029	8.63061	9.10894	9.45622	7.57198	5.78198	5.89088	7.83451	-1.40973	0.985976
mz_1374.4404	5.98525	5.76206	7.42561	7.76596	7.6103	3.85929	7.50739	7.81607	6.26276	7.54487	5.97857	1.33909	0.985976
mz_1358.8688	7.32577	7.85664	7.23805	6.12043	7.27346	8.00222	8.62079	7.25402	8.62164	6.90642	7.12132	-0.927244	0.985976
mz_0951.6696	8.63461	6.85221	8.99783	7.10249	8.3854	5.59182	8.51843	8.55141	8.17923	8.95724	6.86198	1.22128	0.985976
mz_2010.3085	7.95522	9.1679	7.94757	9.57711	7.7373	9.77811	9.07238	8.87561	8.37973	7.88923	9.04514	-0.913598	0.985976
mz_0603.4408	10.6278	9.99722	9.09157	10.6214	10.0998	8.55729	9.08113	10.4445	9.60456	10.2546	10.0443	0.886705	0.985976
mz_1006.7858	11.6413	10.5196	9.55302	11.224	9.38431	11.3126	12.0876	10.4991	9.81306	9.94042	9.92568	-1.05899	0.985976
mz_0584.5249	13.4691	13.5993	12.6025	14.4997	13.2259	14.0025	14.6951	12.1505	13.8098	12.4693	11.5798	-1.12314	0.985976
mz_1632.3283	11.7041	11.7424	11.6441	10.1857	11.5005	6.95283	9.55443	10.3636	10.3469	10.5997	10.7005	1.46409	0.985976
mz_2166.4048	9.67086	9.29782	10.1686	9.81082	10.2127	8.40159	9.5614	9.43676	9.22778	10.1766	10.9006	0.863654	0.985976
mz_1156.9219	12.8586	11.0143	11.3399	12.6917	11.3222	11.9374	10.4654	11.5117	12.9346	12.4764	11.8176	0.980037	0.985976
mz_2297.5018	10.0039	10.4194	10.9486	11.2426	11.5696	9.26416	10.4081	10.825	10.6736	10.5043	11.3927	0.864499	0.985976
mz_1411.9861	8.66222	7.36305	9.06669	9.41828	8.04619	8.26909	8.84831	9.09659	9.01963	9.84434	9.25247	0.890647	0.985976
mz_2148.8731	10.1932	10.1602	9.78477	8.48725	9.03527	10.3814	10.2429	8.6172	10.1631	6.06835	8.67538	-1.38343	0.985976
mz_2594.2367	11.4979	10.7011	11.323	11.7722	11.5639	8.70924	11.0507	10.6662	10.2544	11.2398	10.9869	1.00939	0.985976
mz_1910.6787	9.82208	5.94241	10.3931	10.5424	7.10768	5.68475	10.68	11.9207	9.77197	7.06445	10.28	2.17707	0.985976
mz_0752.5824	7.35046	7.9392	6.6485	7.12424	8.21276	7.94563	8.11723	6.47394	6.91616	6.78392	7.73809	-0.844681	0.985976
mz_2573.1737	7.5136	8.74541	8.03795	6.68981	7.96836	8.43265	8.50519	8.34776	8.2797	7.12887	7.79463	-0.840998	0.985976
mz_1083.5639	11.0952	10.8977	10.8887	12.0864	11.3587	10.6897	9.21862	10.7465	11.1056	10.6123	11.4363	0.897559	0.985976
mz_1387.9486	16.4889	16.1714	16.5731	16.1401	15.9291	16.4921	14.0265	16.6477	16.432	17.4838	17.018	1.02575	0.985976
mz_1834.4825	8.71031	7.51573	7.58517	8.18819	7.70604	6.13829	7.29863	7.70963	7.39752	8.03094	7.36037	0.851804	0.985976
mz_1526.0777	11.1174	8.79404	10.7396	10.9508	10.1026	10.0475	8.81654	8.83088	9.95771	10.0645	9.95472	0.995405	0.985976
mz_1164.9257	12.7143	8.65176	11.1358	9.39797	11.0568	12.743	8.44254	13.3941	11.4279	13.6823	11.7122	1.86941	0.985976
mz_1393.9239	9.07615	7.97886	8.64027	8.41828	7.5471	8.30159	6.3364	8.87	8.13101	8.15059	9.488	1.00123	0.985976
mz_1846.0583	10.9693	9.48919	11.4828	11.1145	11.772	10.5089	10.8429	11.978	11.0554	10.7957	10.2374	0.895304	0.985976
mz_1102.7122	9.26131	9.03687	7.22233	8.35578	8.57261	10.0228	10.4595	8.29734	9.79278	9.12479	9.57067	-1.06502	0.985976
mz_2597.6728	8.60827	8.36521	8.51199	7.44727	8.03034	8.88867	8.99914	7.13275	8.55428	7.2977	6.24759	-1.02223	0.985976
mz_1086.1012	8.72722	16.6201	11.1548	9.86647	15.4887	16.4519	10.7786	9.75989	11.6809	14.0169	13.7615	-2.80981	0.985976
mz_1173.0867	9.63361	9.31447	8.77241	8.1877	9.93743	12.0144	12.1106	9.1758	9.92538	12.428	8.38865	-1.59035	0.985976
mz_1440.0527	12.3185	12.1863	12.477	12.1962	12.8661	11.5634	11.9873	12.6029	12.5675	12.8978	13.3593	0.748332	0.985976
mz_2903.3152	7.36966	5.1211	8.11639	7.121	5.48982	5.11736	6.83569	7.57531	6.95936	5.20129	7.84361	1.26817	0.985976
mz_0889.6140	9.27103	9.01264	8.83931	8.34817	9.01568	10.1864	9.29911	7.96088	7.73504	9.35551	8.2049	-0.908054	0.985976
mz_0843.3348	13.6944	15.8062	12.5493	11.8537	14.716	16.0318	13.095	15.3152	14.6098	11.0416	11.2954	-1.84322	0.985976
mz_2337.2586	8.13564	8.33437	6.36532	7.98527	7.46158	7.71316	10.3121	7.88082	8.35457	8.09991	7.16226	-1.10588	0.985976
mz_0741.6156	7.19721	7.31575	5.97281	6.81206	3.90904	7.99399	7.88906	6.74184	7.00132	7.8142	6.26668	-1.26854	0.985976
mz_0644.6477	7.27148	6.28746	6.5236	6.76981	6.87419	5.04968	6.3309	6.67213	7.5766	10.4462	6.35857	1.42223	0.985976
mz_0538.2752	6.21562	7.4802	4.88901	5.44291	6.37456	7.39784	7.29303	6.73803	8.1113	6.27985	6.42739	-1.08052	0.985976
mz_1634.1833	8.80286	8.76944	8.81916	9.01042	7.77474	7.29328	7.59796	8.80254	8.94993	9.40143	8.47421	0.867516	0.985976
mz_2563.2358	10.4786	9.45515	10.4196	9.66741	10.1742	8.76939	9.84715	9.9386	9.36658	10.9288	10.682	0.84975	0.985976
mz_1307.8562	13.6026	12.9431	15.4614	12.5049	13.5399	15.135	15.9014	13.5983	12.9045	12.5493	11.9212	-1.39955	0.985976
mz_0601.5929	8.43629	7.00807	7.91253	5.86206	8.31701	5.36837	7.27059	7.60383	8.2892	10.6115	7.17596	1.47705	0.985976
mz_0974.6175	9.00771	6.04905	7.06838	9.37284	7.96222	7.30099	8.3991	9.66659	9.73048	8.19662	7.32775	1.29186	0.985976
mz_0805.6429	7.0662	6.45811	7.3878	8.30274	6.10978	6.76947	6.27946	8.88974	7.89801	7.61784	6.95319	1.02582	0.985976
mz_1459.5057	10.2927	10.2808	10.7293	9.72441	8.89126	11.2556	10.9492	9.59783	9.75621	10.6847	9.84162	-0.888768	0.985976
mz_2733.6083	9.41797	9.78967	9.44123	9.73335	10.2897	8.95319	9.07385	10.0579	10.5935	11.1794	10.5542	0.886163	0.985976
mz_2579.7213	9.69229	9.87413	9.86458	9.4442	9.06924	7.34372	8.6199	9.49592	9.48568	9.54438	9.6653	0.92012	0.985976
mz_1176.6860	15.1348	16.6346	17.0812	15.0526	16.1824	16.6253	17.4381	16.1486	16.0098	16.4546	15.7826	-0.918541	0.985976
mz_1071.7529	12.1638	10.78	11.6605	11.0295	10.9102	12.1011	9.6607	11.9683	12.684	13.9431	12.4296	1.25137	0.985976
mz_2990.0382	10.004	9.72235	10.0973	10.2992	9.26037	9.39355	8.78951	9.64364	10.8139	10.2327	10.7438	0.835062	0.985976
mz_1157.6188	13.0023	15.068	15.8891	13.6358	12.7093	14.7527	16.301	14.6234	14.1951	13.2543	15.3542	-1.29098	0.985976
mz_1583.3019	9.14114	6.66426	9.58089	9.65852	8.95016	9.87389	7.98914	9.02335	9.66473	8.61611	9.38588	1.07683	0.985976
mz_0933.5576	11.6035	10.437	10.9491	10.4349	11.6651	11.2239	7.57574	10.5848	9.90384	11.6846	11.5021	1.29546	0.985976
mz_1196.7309	8.03576	8.62309	6.6131	6.47641	4.52912	8.00751	8.34435	8.16922	8.79857	6.4515	6.23476	-1.41143	0.985976
mz_1358.2772	12.2467	10.813	10.9125	11.5482	10.7837	10.8824	10.2607	12.58	12.0295	10.9727	11.3776	0.904319	0.985976
mz_0412.1496	12.5485	13.7282	13.3446	13.0413	13.1453	14.7025	12.9878	12.2826	13.8555	10.0873	10.941	-1.40042	0.985976
mz_1566.6044	9.023	7.1902	8.48784	9.79954	6.84732	7.88226	8.30231	8.65262	9.40693	9.86664	9.29796	1.13114	0.985976
mz_1543.0796	9.66731	7.05407	7.31405	9.30583	8.04054	8.63915	7.0607	8.34904	8.83721	8.60149	8.81125	1.0312	0.985976
mz_1042.6706	6.27589	8.2495	8.21024	8.53181	6.24202	8.28138	8.8531	6.82148	8.60476	7.10858	7.06508	-1.10384	0.985976
mz_2625.1915	7.04909	8.05898	7.28007	8.79762	7.9382	9.01753	9.13967	8.09417	5.69424	6.71938	8.7453	-1.19897	0.985976
mz_1180.7814	16.4246	15.3295	18.379	16.0013	15.9169	18.0957	18.4527	14.9994	14.7898	14.8374	14.2248	-1.59601	0.985976
mz_1463.0769	12.4237	12.162	12.2846	12.4927	12.0754	14.1612	13.1802	12.1021	12.0686	12.7311	12.4642	-0.837494	0.985976
mz_0864.5960	8.15355	7.01595	9.16445	7.81935	7.92348	7.03547	7.42821	7.25046	7.00206	8.8382	8.9206	0.974144	0.985976
mz_2574.1669	8.35598	5.99334	8.44038	8.10749	6.67044	6.81321	8.3108	8.06594	8.44172	8.25899	8.06204	1.01126	0.985976
mz_1063.7185	7.92845	9.20254	7.97732	8.86094	7.99435	7.79917	9.19692	5.73903	6.70567	8.24332	6.87727	-1.19208	0.985976
mz_2535.7815	10.3555	9.0379	9.92369	10.5399	10.4057	10.0219	10.1699	10.576	10.692	11.1541	10.515	0.777016	0.985976
mz_1224.8229	8.46817	6.33374	6.36624	9.40052	7.14836	6.13091	6.83696	7.2742	7.55121	6.32461	8.47398	1.19204	0.985976
mz_1696.1848	14.9646	14.9683	14.7601	14.5254	14.3545	13.3282	14.1206	16.0469	15.8228	14.6265	15.8071	0.974467	0.985976
mz_1138.5898	5.73702	7.22718	4.00666	5.91789	5.83509	8.2886	6.382	6.27708	8.06602	5.16118	6.73253	-1.33258	0.985976
mz_1012.5968	8.13544	6.83831	7.43377	8.88997	7.88554	7.56648	7.72669	8.21643	8.776	8.24771	7.91051	0.809762	0.985976
mz_1019.6441	7.9059	8.51493	9.0141	7.94881	9.64236	9.8269	12.1282	9.94576	9.57758	8.60749	7.78044	-1.35386	0.985976
mz_1108.9325	8.90339	8.53956	9.25844	10.2034	8.04617	8.1879	8.73653	9.09792	9.77094	11.0885	10.1837	1.08105	0.985976
mz_0931.7361	6.54841	7.49997	6.62938	7.26505	6.83196	6.58837	8.19783	6.66545	6.73752	5.87535	6.04889	-0.85347	0.985976
mz_1734.6341	9.15259	8.55427	9.07058	9.45634	8.35679	8.27036	7.50211	9.68354	8.84067	9.85487	7.86557	0.926206	0.985976
mz_1054.8174	7.78321	8.12785	7.12177	8.18366	6.79813	4.52393	7.50871	8.8471	8.89254	8.19391	8.66948	1.34106	0.985976
mz_2235.8214	9.70885	8.38972	9.22664	10.0688	8.31124	8.2063	8.18217	9.19377	9.07984	8.67724	8.53739	0.841074	0.985976
mz_0818.5271	8.11883	5.94109	8.44803	8.52025	7.3756	5.67623	8.59533	8.3667	7.81139	8.25688	6.52221	1.18994	0.985976
mz_0504.3061	14.3346	14.5433	16.6292	14.1047	14.4699	15.8507	16.5026	14.0897	14.3248	14.2843	13.5443	-1.15953	0.985976
mz_0788.6175	9.14866	9.15021	7.2677	9.25413	7.9912	9.34718	8.15295	5.95555	5.14032	5.96228	7.86195	-1.56072	0.985976
mz_1566.9994	9.57021	7.43178	9.38319	7.15163	8.52801	9.18722	6.22056	8.50335	9.36721	10.4316	8.50807	1.31722	0.985976
mz_1372.9238	7.61169	9.57634	8.18308	9.45232	9.40949	9.3695	10.1026	8.82707	8.74818	9.18375	9.00343	-0.880437	0.985976
mz_1774.1673	9.50222	9.98434	8.43041	8.20237	8.15833	9.02041	10.0269	9.51088	7.94331	8.95293	9.37885	-0.917302	0.985976
mz_1482.0170	7.29521	8.15916	7.65784	7.48239	7.79485	8.452	8.18086	7.96951	6.58973	7.71363	7.58377	-0.753142	0.985976
mz_1149.8127	6.27657	7.85851	6.55721	7.32687	5.45802	8.04226	7.86586	7.65126	8.19981	5.9697	7.4043	-1.06674	0.985976
mz_0869.5361	9.90233	11.8624	11.6591	9.83352	9.46696	11.4425	10.2792	9.99156	8.80294	10.8815	10.2776	-1.09277	0.985976
mz_1270.9571	7.03689	7.50373	7.82503	8.01881	8.10407	4.42524	7.51373	8.27937	7.22438	7.34062	7.28915	1.15889	0.985976
mz_0759.5417	11.915	11.7524	11.6334	9.78757	9.88265	11.2045	10.7972	9.79863	7.91102	8.48342	9.05915	-1.44247	0.985976
mz_1497.0460	7.96856	7.36573	4.29548	7.78587	9.08743	10.6132	8.62718	5.3766	5.82071	8.08292	7.95223	-1.8225	0.985976
mz_2384.8418	8.92906	8.01113	8.89902	9.72735	8.85421	8.46614	8.61491	8.57513	9.26532	9.24576	9.29409	0.734681	0.985976
mz_2414.7596	11.5991	10.111	12.4547	10.7848	10.4952	9.40682	11.4439	10.9555	11.6118	11.9225	10.866	1.0156	0.985976
mz_2138.3523	9.95043	10.2438	9.38322	10.2684	10.2587	10.6851	11.0386	9.63061	10.645	9.3721	8.68796	-0.881263	0.985976
mz_0631.3075	4.77584	8.22927	5.74985	7.1435	6.61801	7.89862	7.61282	3.39044	7.6139	7.26215	8.06929	-1.5857	0.985976
mz_1577.8074	8.06679	7.16539	8.47752	8.08982	7.89162	7.56669	7.61499	8.19397	7.49806	8.59166	8.85324	0.758813	0.985976
mz_2215.9044	8.71882	7.01187	7.7284	8.12386	7.97982	8.39447	5.58902	7.77204	8.05488	8.42344	7.30515	1.01485	0.985976
mz_1184.8279	9.84788	8.1352	8.98016	9.96459	8.07652	8.39271	8.6691	8.82853	9.99331	10.4032	8.87752	0.972455	0.985976
mz_0578.4263	8.88645	6.90089	7.16084	10.7733	9.18448	8.93286	7.89425	8.95168	9.10834	9.10995	9.96677	1.2334	0.985976
mz_0841.3191	15.0125	18.1624	13.1571	14.4924	16.4992	18.6959	14.4654	17.1011	17.4065	12.2376	13.7248	-2.154	0.985976
mz_1385.8613	13.2969	13.234	13.4563	13.0327	12.6529	11.272	11.5577	13.2843	13.7688	11.5299	13.4582	1.03879	0.985976
mz_0497.3449	15.1147	13.2477	16.7128	12.7485	14.0546	16.9596	17.0877	12.5816	13.1042	14.6074	12.6232	-1.82162	0.985976
mz_1307.9013	10.8804	11.0843	10.9758	8.2607	10.2062	8.14033	8.60633	10.7156	12.112	11.548	11.0328	1.43946	0.985976
mz_0756.3566	9.49859	11.2001	10.6562	8.62202	9.81502	11.6887	9.70673	10.2563	10.3364	10.178	9.56308	-0.999455	0.985976
mz_1295.8523	8.02786	10.0831	9.17412	9.73256	9.48917	10.7756	9.97702	9.81846	9.64647	9.87079	9.53247	-0.867072	0.985976
mz_2460.8097	8.2379	6.08985	7.83594	7.73756	8.65205	7.26832	7.75375	7.83692	7.3167	7.24196	8.93594	0.937067	0.985976
mz_0708.4845	7.97787	12.3772	10.1263	9.45281	12.5114	12.352	12.3742	9.45478	12.5183	11.515	12.0909	-1.66191	0.985976
mz_1547.1762	8.31827	7.8343	10.2138	9.05089	7.97049	5.74799	8.15258	7.01612	7.49759	9.92404	8.83707	1.35858	0.985976
mz_2446.1479	8.06923	9.63379	7.93072	8.07025	9.05744	9.42819	8.80785	7.62395	8.86414	8.0122	9.49255	-0.899883	0.985976
mz_2061.7240	6.55891	6.86898	7.57031	6.87863	9.6698	6.88472	7.07444	9.97635	7.76841	10.8986	8.67308	1.55655	0.985976
mz_2657.3745	7.00073	6.46281	7.21188	6.6622	7.55346	7.18431	4.47406	7.30386	7.35192	6.22318	7.10157	1.0107	0.985976
mz_1357.3422	8.56002	8.5517	7.94394	8.75775	10.0351	7.2103	7.46898	7.08903	9.36113	11.0963	11.2711	1.52062	0.985976
mz_1496.0800	7.93346	8.9221	8.24871	9.0543	7.75127	9.33576	8.66459	8.5835	8.20176	7.01596	8.16698	-0.854661	0.985976
mz_1244.7474	12.9283	12.4229	12.3321	13.1632	11.7016	10.1755	11.941	12.6688	11.2715	13.8635	13.7032	1.1909	0.985976
mz_0874.7736	8.21864	4.23896	8.30898	7.72166	8.25979	7.81173	5.73413	8.28387	8.11197	5.65514	5.34401	1.55974	0.985976
mz_1625.2079	9.20895	7.46515	8.60866	8.48911	9.00213	7.84433	6.73447	7.31948	8.80152	7.49268	7.58452	0.965396	0.985976
mz_1574.1352	8.94937	8.73268	8.7739	8.55161	9.16047	6.35298	8.55019	9.52125	9.03181	8.08621	8.8269	0.984073	0.985976
mz_2632.1606	9.61392	8.81753	8.83658	8.82011	8.74388	8.05387	5.28968	8.27	7.21516	9.32961	8.5284	1.28268	0.985976
mz_1245.0835	8.41602	8.28523	8.62983	7.62317	7.97161	6.78411	6.96302	9.14375	8.69774	9.36624	7.09271	1.02351	0.985976
mz_1005.8093	11.5196	11.5119	12.234	9.92543	10.829	9.40904	9.94462	11.9507	12.5405	10.6749	11.8909	1.15712	0.985976
mz_1416.0245	7.97442	6.75369	3.9697	8.28027	5.99229	11.1356	10.1307	7.05576	6.24201	9.48113	9.04271	-2.08522	0.985976
mz_1310.8894	11.3259	10.875	9.52761	9.99364	9.11484	11.3074	11.5211	11.4456	10.0792	10.7314	8.63042	-1.12842	0.985976
mz_1533.1606	11.4716	12.1778	12.963	12.2173	12.3751	12.3711	13.3167	10.1492	10.8607	11.3947	10.5629	-1.12257	0.985976
mz_2662.6755	9.33679	9.9062	10.1742	9.2087	9.81577	6.90615	9.33829	10.319	9.97444	9.33405	10.202	1.07874	0.985976
mz_0937.5448	9.56715	8.97901	9.90273	10.2174	9.18266	9.33475	9.18351	9.92718	10.2201	9.75083	10.6943	0.76704	0.985976
mz_0573.4514	7.99128	9.01877	7.26712	7.30891	8.50442	9.40945	8.24091	7.75103	8.66651	8.91427	6.33039	-1.04797	0.985976
mz_1704.4389	10.189	6.38722	11.1518	13.0639	7.74903	7.53658	11.63	13.4116	8.25963	11.1417	12.3887	2.4015	0.985976
mz_1589.4521	10.3716	12.9686	10.3999	11.3432	13.1926	13.9798	13.3653	10.5474	12.4666	15.0658	10.7411	-1.67187	0.985976
mz_0485.2874	16.0045	14.9548	17.0857	15.3477	15.6833	17.2346	17.6646	15.013	15.0259	13.5033	14.4839	-1.34959	0.985976
mz_2827.0003	10.5488	10.0749	9.63367	10.7699	10.0575	8.90501	9.43441	9.988	10.0918	10.4844	10.3763	0.772368	0.985976
mz_0859.3297	8.61391	9.31589	6.72743	6.23179	6.23566	6.84914	7.72191	7.34811	6.41615	6.56589	6.43094	-1.14108	0.985976
mz_1458.0632	9.21071	10.2596	9.2575	10.4969	10.0403	12.3263	10.2885	9.34896	9.5198	11.5866	8.21	-1.24929	0.985976
mz_2124.9448	8.29366	6.08157	7.85387	6.17285	5.56223	5.42889	7.85528	9.28899	9.45928	9.10447	8.48538	1.57234	0.985976
mz_1981.7793	9.96513	7.8003	10.3542	11.5488	7.87128	7.33603	11.0171	11.9908	10.4427	10.0829	10.2852	1.59984	0.985976
mz_2360.7126	13.4336	13.0857	12.7625	13.6501	12.5436	11.6551	11.8244	12.2815	14.1056	13.4795	12.7256	0.934347	0.985976
mz_0682.4665	6.41444	7.46913	9.07784	7.90364	7.16903	5.79361	7.06543	8.24824	7.96095	8.8367	7.3917	1.09926	0.985976
mz_1076.6675	7.66805	8.0581	7.08687	7.60351	7.83997	6.6221	4.78815	8.3717	6.49793	7.65787	8.68739	1.18721	0.985976
mz_1676.0483	7.66077	7.53198	9.76729	7.45706	8.38578	7.99236	6.39934	8.30973	8.52942	8.54193	7.76517	0.99425	0.985976
mz_1623.0984	12.408	12.4147	10.2281	11.9555	11.3924	13.746	11.3066	10.6036	12.1831	11.4294	10.7312	-1.12268	0.985976
mz_0427.3793	9.32103	7.63727	9.53421	8.51035	9.61251	7.25755	8.18974	8.78608	6.90118	9.36623	8.09982	1.07157	0.985976
mz_1270.8581	6.72988	6.88608	7.70774	6.91832	4.14053	8.31812	8.52883	6.87515	6.00888	7.57386	7.10241	-1.27892	0.985976
mz_2432.1322	7.56537	11.1464	8.16787	9.68933	9.43084	9.35724	9.22898	4.82257	8.17982	8.81657	9.47025	-1.64304	0.985976
mz_1373.1544	4.92062	8.12499	4.77836	8.97033	6.11991	7.151	9.13001	6.12854	5.31024	8.61543	7.04642	-1.64911	0.985976
mz_2583.6689	9.47201	7.63827	9.66676	9.94403	9.25874	8.68571	8.65797	10.2052	7.81109	10.3584	8.38811	1.06073	0.985976
mz_2883.8473	11.9903	11.8653	12.6155	12.1934	12.0225	8.06586	12.079	12.3499	11.7161	10.975	12.1785	1.3351	0.985976
mz_1649.7686	4.21851	3.89654	7.39518	7.45506	7.3148	5.41062	6.30904	7.22255	5.87569	7.73294	5.67397	1.40569	0.985976
mz_1528.8244	8.37717	9.57678	8.93378	9.15419	7.83303	9.60967	9.64845	9.0842	8.86079	9.46423	8.92665	-0.782378	0.985976
mz_1532.1112	9.08498	7.80824	8.60395	9.51052	10.4057	8.34793	9.22293	9.89313	8.75366	9.67521	9.02255	0.909015	0.985976
mz_0617.4289	8.99551	7.48183	8.4902	9.60672	8.59241	8.31927	8.13413	9.71433	8.70225	7.754	8.99452	0.877836	0.985976
mz_1775.6130	5.14108	4.32943	7.32921	7.85726	9.49397	6.16722	7.84318	7.39467	7.66946	7.56216	9.24282	1.59805	0.985976
mz_0343.1516	7.12612	7.9491	7.99493	7.98298	7.88009	6.15229	6.02452	7.27219	8.09112	7.11974	7.41409	0.901521	0.985976
mz_1787.3488	9.01954	6.23208	7.80199	8.88825	7.05785	8.36841	7.89687	9.70795	8.60182	10.0345	8.49704	1.202	0.985976
mz_1243.7455	13.4299	14.9312	14.1589	15.1595	13.9649	12.3566	13.9522	15.8108	15.8996	15.7296	16.1873	1.29593	0.985976
mz_0555.5347	9.39468	10.3854	8.98354	9.04672	8.84431	9.04142	9.79866	8.71474	8.81559	8.99253	9.21601	-0.740811	0.985976
mz_0737.5439	9.18204	7.4634	7.7401	9.43841	9.65129	9.15979	8.16381	9.60908	10.7865	9.00073	9.25763	1.07089	0.985976
mz_1279.0244	7.76583	7.39786	7.2919	6.84184	7.7122	7.984	8.00042	6.82474	6.6928	6.18689	5.73012	-0.913303	0.985976
mz_0558.3648	7.11424	6.00724	7.31083	7.67091	6.65558	6.75923	6.57494	6.4724	7.56799	7.87723	7.25809	0.793768	0.985976
mz_1345.2204	8.58017	7.34826	7.69316	7.21548	8.38018	4.03698	6.50245	6.23068	6.99044	7.68529	5.80025	1.35939	0.985976
mz_1542.1218	10.0726	9.49895	10.8123	9.51423	10.3154	6.83224	10.4287	9.19174	10.5032	10.0474	10.5202	1.20216	0.985976
mz_2803.9854	8.2266	9.14229	8.26979	9.23265	9.04317	7.09517	7.97139	9.82854	9.37934	8.70953	9.5587	0.961425	0.985976
mz_1540.1661	4.04169	6.29184	5.53614	4.08806	6.93357	6.63366	7.7902	7.2833	5.74496	5.59704	5.80984	-1.27591	0.985976
mz_1181.9254	9.44234	10.229	8.73929	10.3144	6.81358	6.07671	5.20619	7.86946	9.06653	9.48856	9.61927	1.74853	0.985976
mz_2367.6606	13.7749	12.9359	13.3036	13.7184	13.2053	10.873	12.8832	13.2988	12.4337	12.9305	12.7407	0.945033	0.985976
mz_2560.7377	8.68085	10.1754	9.44333	9.01172	9.06643	10.3737	9.6461	8.55922	9.26922	10.4794	9.24073	-0.846204	0.985976
mz_1512.3038	7.8475	6.37836	5.30751	7.37936	6.77317	6.39357	5.57331	8.15112	7.46911	7.78153	6.68186	1.05881	0.985976
mz_1958.3629	10.4131	11.3839	10.6284	10.4664	9.98828	11.0378	12.3088	11.1672	11.3371	8.53036	11.3386	-1.09317	0.985976
mz_1721.2068	6.79571	7.24724	7.19247	5.98429	7.71742	8.3281	7.66145	7.65998	6.88948	5.53264	6.38496	-0.975979	0.985976
mz_1483.8970	16.3451	15.3958	16.0692	16.7081	16.6796	14.6554	15.674	15.5468	16.3192	14.9036	16.3747	0.876548	0.985976
mz_1190.7537	15.3194	15.7205	17.8978	15.6503	15.9076	16.3817	18.2192	15.1151	14.7689	13.9909	14.3797	-1.39508	0.985976
mz_1111.7361	10.4243	10.1377	10.4877	10.8881	11.4909	10.8733	9.76686	11.2881	10.8514	11.3925	11.8162	0.820627	0.985976
mz_2291.6215	5.88837	8.95466	7.16539	8.12576	7.51654	9.14158	8.47943	7.9374	7.34476	9.22067	8.68426	-1.12317	0.985976
mz_2111.8311	7.44218	7.70712	7.70807	5.91416	4.73262	9.23958	7.43547	6.34788	8.28652	6.3589	7.69154	-1.31715	0.985976
mz_0846.6454	14.7648	14.5481	14.5899	13.7273	14.2014	16.2184	14.0524	13.2205	13.7794	13.24	14.1487	-0.980642	0.985976
mz_1467.9172	14.0099	12.9899	13.7455	13.6247	13.7809	10.3744	13.1619	12.9565	13.0576	12.1261	13.0984	1.12455	0.985976
mz_0875.4397	6.25258	8.22508	4.91296	8.36537	5.01675	7.92429	6.96903	5.96274	8.03055	5.61628	6.68391	-1.35099	0.985976
mz_1749.4012	9.33045	7.91284	9.70448	8.77351	9.007	8.37965	8.97833	10.4115	8.44624	8.92888	10.2155	0.928582	0.985976
mz_1464.4271	8.68308	2.362	8.98771	10.8908	8.60886	8.05629	8.94753	8.77209	9.37015	6.38615	7.38374	2.18005	0.985976
mz_1475.8566	14.314	13.8499	14.0856	14.4196	14.0338	12.5464	13.4699	14.1433	14.2382	13.1038	14.4212	0.806211	0.985976
mz_2872.2417	7.46942	8.41827	8.51681	9.14261	8.6714	5.30965	8.07246	8.0584	8.56974	8.49522	8.19798	1.1234	0.985976
mz_1571.1398	10.3744	11.2731	10.9318	11.7262	11.234	11.814	11.6282	9.50045	10.4217	10.1304	11.04	-0.901891	0.985976
mz_1303.6786	7.10285	7.58713	7.34508	7.46244	4.86475	4.3033	3.68236	7.22346	7.55816	6.26587	5.58882	1.4855	0.985976
mz_1540.5323	6.04818	7.34994	6.64344	7.17665	5.41045	7.51231	7.85295	6.61752	7.64231	6.92473	6.96663	-0.892994	0.985976
mz_1531.0280	11.1083	8.92303	11.2544	11.7079	10.9059	11.2268	9.2442	8.82061	11.2069	12.1082	11.1164	1.23056	0.985976
mz_1657.2494	10.7046	8.91807	10.9105	9.65666	8.81383	9.35557	9.2843	9.77062	9.90105	10.6717	10.2015	0.892824	0.985976
mz_0719.1570	11.24	13.9199	12.8396	12.0141	12.6948	13.456	13.3646	11.9653	12.4305	14.29	12.9148	-1.03154	0.985976
mz_1082.6668	7.99482	9.4504	7.60357	7.57188	8.68383	8.55307	8.62411	8.96521	7.65082	7.60727	8.26436	-0.833141	0.985976
mz_1126.0370	7.60947	9.86751	9.78765	10.6347	9.77241	6.41081	8.33825	10.0664	8.79353	9.99741	9.66546	1.33535	0.985976
mz_1127.7403	15.1887	15.5277	16.4379	15.4077	15.412	16.1816	17.4522	15.5034	15.9361	14.8583	15.1211	-0.904038	0.985976
[truncated: 26,012 more rows]

## Sheet: ST10_global_L2_strains
Supplementary Data 10. 1,000 L2 Mtb strains obtained from previously published Mtb whole-genome sequencing studies. All Mtb WGS data can be downloaded by searching study IDs in the NCBI Sequence Read Archive (SRA) database (https://www.ncbi.nlm.nih.gov/sra).
StuyID
ERP001037
PRJDB3875
PRJDB7006
PRJDB8544
PRJDB8553
PRJEB10385
PRJEB10533
PRJEB10950
PRJEB11778
PRJEB12184
PRJEB13325
PRJEB14199
PRJEB15382
PRJEB18529
PRJEB21685
PRJEB21922
PRJEB23245
PRJEB2358
PRJEB24463
PRJEB25543
PRJEB25592
PRJEB25971
PRJEB25972
PRJEB25991
PRJEB25997
PRJEB25999
PRJEB26000
PRJEB26001
PRJEB26002
PRJEB27354
PRJEB2794
PRJEB28842
PRJEB29199
PRJEB29446
PRJEB29604
PRJEB31023
PRJEB32037
PRJEB32234
PRJEB32341
PRJEB32684
PRJEB35201
PRJEB5280
PRJEB6273
PRJEB7056
PRJEB7281
PRJEB9680
PRJEB9976
PRJNA200335
PRJNA217391
PRJNA219826
PRJNA220218
PRJNA229360
PRJNA235852
PRJNA237443
PRJNA268900
PRJNA270137
PRJNA282721
PRJNA300846
PRJNA302362
PRJNA305488
PRJNA306588
PRJNA308536
PRJNA318002
PRJNA352769
PRJNA355614
PRJNA361483
PRJNA369219
PRJNA376471
PRJNA379070
PRJNA385247
PRJNA390471
PRJNA393378
PRJNA401368
PRJNA401515
PRJNA407704
PRJNA413593
PRJNA414758
PRJNA421323
PRJNA421446
PRJNA428596
PRJNA429460
PRJNA430531
PRJNA436223
PRJNA436997
PRJNA438921
PRJNA454477
PRJNA480117
PRJNA480888
PRJNA482095
PRJNA482716
PRJNA482865
PRJNA486713
PRJNA488343
PRJNA492975
PRJNA506272
PRJNA509547
PRJNA512266
PRJNA522942
PRJNA559678
PRJNA566379
PRJNA578162
PRJNA586859
PRJNA587747
PRJNA589048
PRJNA595834
PRJNA598949
PRJNA598981
PRJNA632617
PRJNA683067
PRJNA684613
PRJNA688213
SRA065095

[truncated: 3 more sheets: ST11_replication_stats, ST12_qPCR, ST13_Nanostring_target_sequence]
